# Supplementary material
Source: publisher figshare collection journal article supplement (https://acs.figshare.com/ndownloader/files/4392319)
Supplement: Supplementary file 1 [file 4392319]

# **Novel Method for Synthesizing Spiro[4.5]cyclohexadienones through a Pd-Catalyzed Intramolecular *ipso*-Friedel-Crafts Allylic Alkylation of Phenols**

Tetsuhiro Nemoto, Yuta Ishige, Mariko Yoshida, Yuta Kohno, Mutsumi Kanematsu, and Yasumasa Hamada\*

## **Supporting Information (2)**

### **5. $^1\text{H}$ and $^{13}\text{C}$ NMR Charts of New Compounds (S-32–S-97)**

# YKYI-04-244-Pro

G:\NMR\12< 2008"N"x\01-N\YKYI-04\YKYI-04-244-Pro 1.als

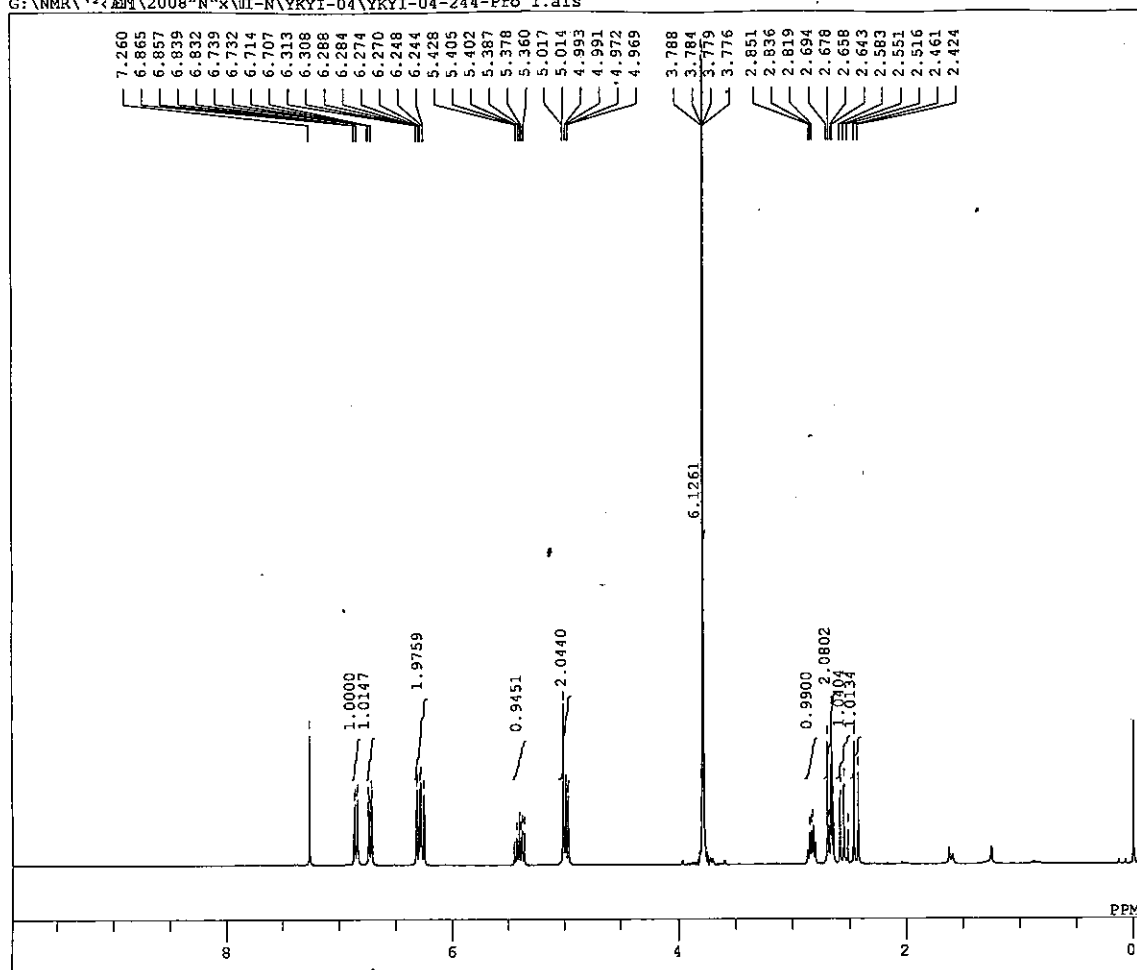

DFILE KYKI-04-244-Pro 1.als  
COMNT KYKI-04-244-Pro  
DATIM 10-MAR-2008 18:19:45  
OBNUC 1H  
EXMOD single\_pulse.exp  
OBFRQ 399.00 MHz  
OBSET 784.00 KHz  
OBFIN 597.07 Hz  
POINT 32768  
FREQU 5998.80 Hz  
SCANS 6  
ACQTM 5.4624 sec  
PD 2.0000 sec  
PW1 6.70 usec  
IRNUC 1H  
CTEMP 22.1 c  
SLVNT CDCL3  
EXREF 7.26 ppm  
BF 0.12 Hz  
RGAIN 20

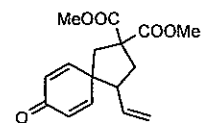

<sup>1</sup>H NMR: 4a

# YKYI-10-723-13C

G:\NMR\12< 2008"N"x\01-N\YKYI-10\YKYI-10-723-13C 1.als

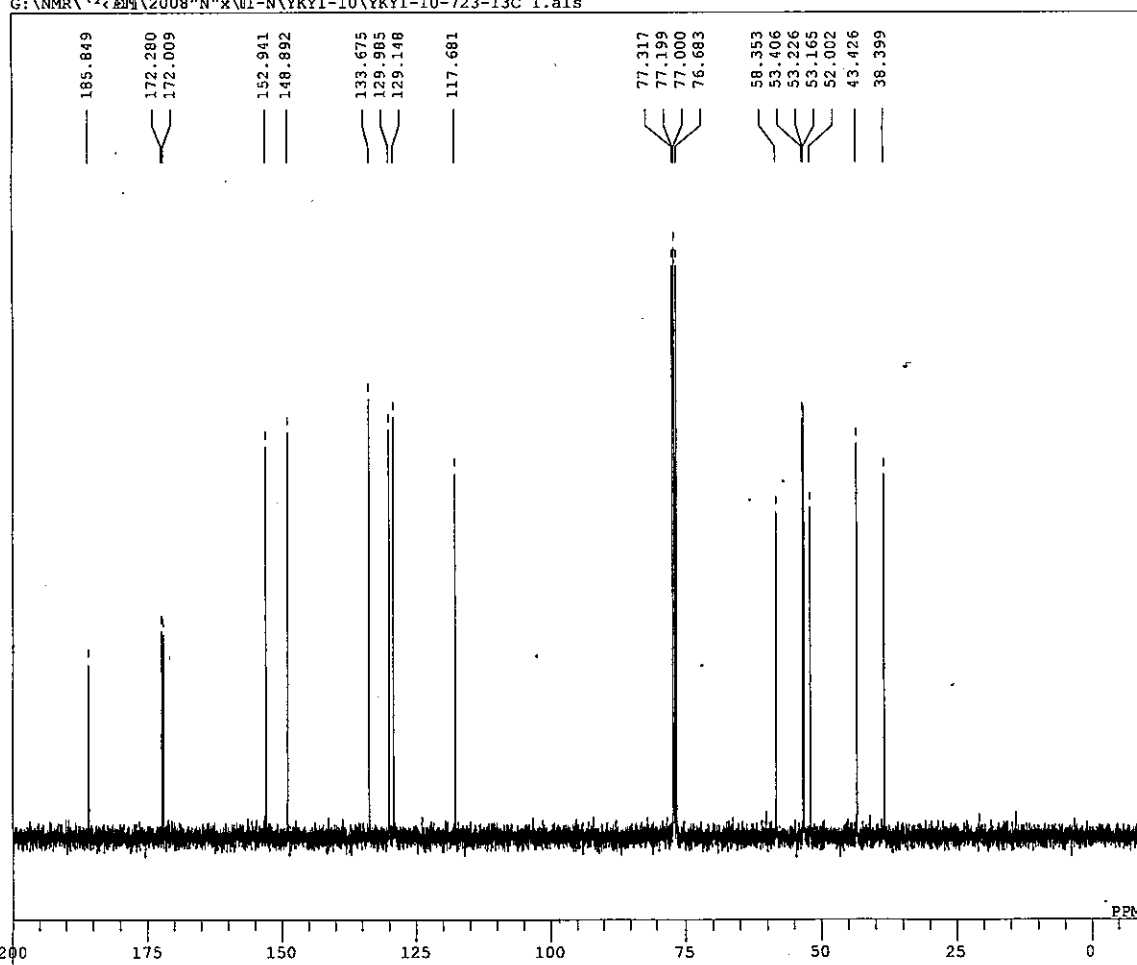

DFILE KYKI-10-723-13C 1.als  
COMNT KYKI-10-723-13C  
DATIM 18-FEB-2009 15:19:01  
OBNUC 13C  
EXMOD single\_pulse\_dec  
OBFRQ 100.00 MHz  
OBSET 536.00 KHz  
OBFIN 361.11 Hz  
POINT 65536  
FREQU 25188.92 Hz  
SCANS 43  
ACQTM 2.6018 sec  
PD 1.5000 sec  
PW1 3.50 usec  
IRNUC 1H  
CTEMP 18.7 c  
SLVNT CDCL3  
EXREF 77.00 ppm  
BF 1.20 Hz  
RGAIN 26

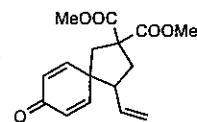

<sup>13</sup>C NMR: 4a

ykyk06-me2

G:\NMR\kf-1\ykyk06-me2 1.als

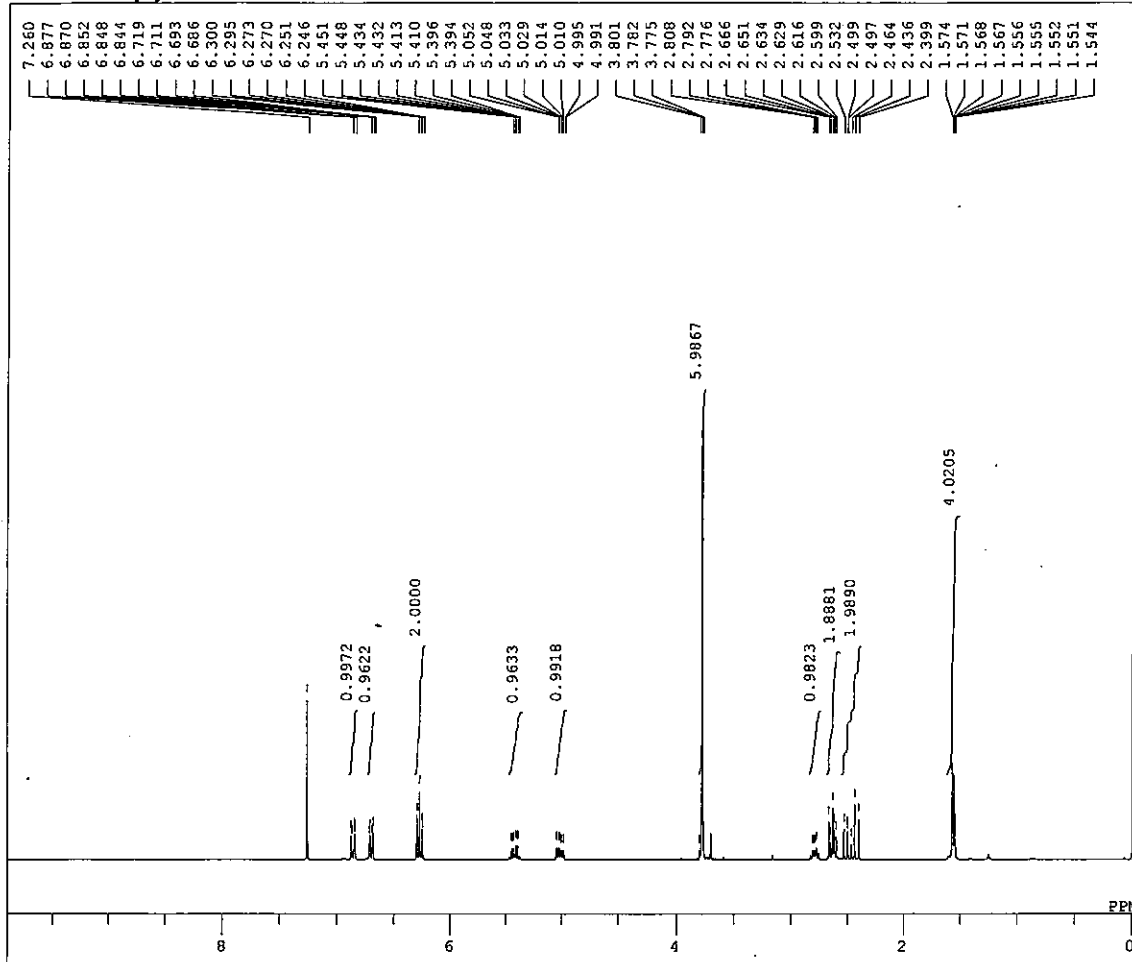

DFILE ykyk06-me2 1.als  
 COMNT ykyk06-me2  
 DATIM 2-OCT-2010 11:34:00  
 OBNUC 1H  
 EXMOD single pulse.exp  
 OBFRQ 399.00 MHz  
 OBSET 784.00 KHz  
 OBFIN 597.07 Hz  
 POINT 32768  
 FREQU 5998.80 Hz  
 SCANS 16  
 ACQTM 5.4624 sec  
 PD 2.0000 sec  
 PW1 6.85 usec  
 IRNUC 1H  
 CTEMP 22.7 c  
 SLVNT CDCL3  
 EXREF 7.26 ppm  
 BF 0.12 Hz  
 RGAIN 18

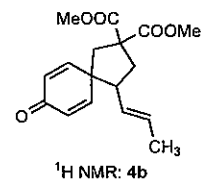

ykyk05-f6-13c

G:\NMR\kf-1\OV,u,6ftfHf6f (3)\ykyk05-f6-13c 1.als

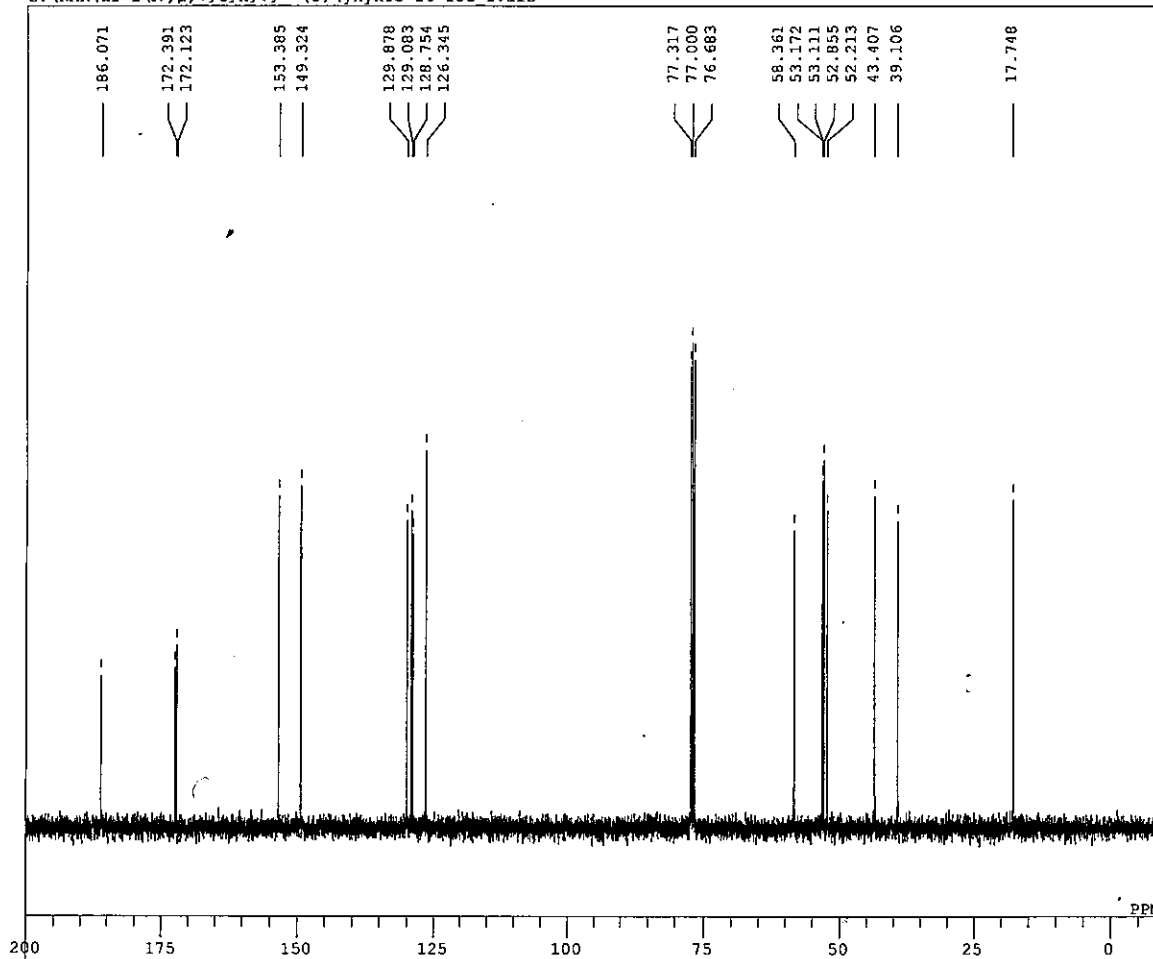

DFILE ykyk05-f6-13c\_1.als  
 COMNT ykyk05-f6-13c  
 DATIM 30-MAR-2010 05:32:10  
 OBNUC 13C  
 EXMOD single pulse dec  
 OBFRQ 100.00 MHz  
 OBSET 536.00 KHz  
 OBFIN 361.11 Hz  
 POINT 65536  
 FREQU 25188.92 Hz  
 SCANS 54  
 ACQTM 2.6018 sec  
 PD 1.5000 sec  
 PW1 3.50 usec  
 IRNUC 1H  
 CTEMP 21.5 c  
 SLVNT CDCL3  
 EXREF 77.00 ppm  
 BF 1.20 Hz  
 RGAIN 24

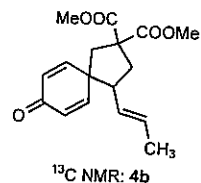

ykyk06-ph

G:\NMR\zf-i\ykyk06-ph 1.als

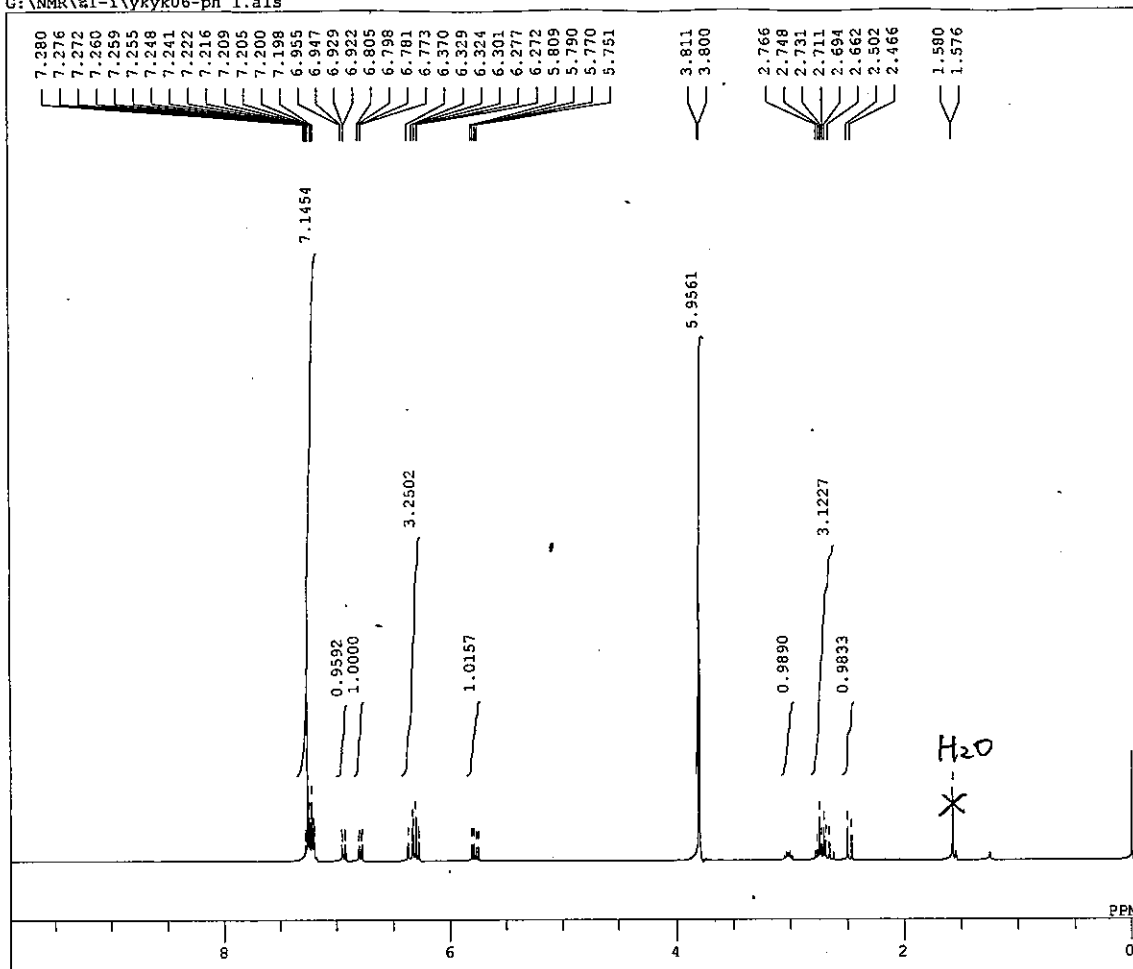

DFILE ykyk06-ph 1.als  
 COMNT ykyk06-ph  
 DATIM 1-OCT-2010 19:20:38  
 OBNUC 1H  
 EXMOD single\_pulse.exp  
 OBFRQ 399.00 MHz  
 OBSET 784.00 KHz  
 OBFIN 597.07 Hz  
 POINT 32768  
 FREQU 5998.80 Hz  
 SCANS 16  
 ACQTM 5.4624 sec  
 PD 2.0000 sec  
 PW1 6.85 usec  
 IRNUC 1H  
 CTEMP 22.3 c  
 SLVNT CDCL3  
 EXREF 7.26 ppm  
 BF 0.12 Hz  
 RGAIN 18

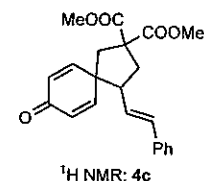

ykyk05-e4-13c

G:\NMR\zf-i\W,u,ftfHf (3)\ykyk05-e4-13c 1.als

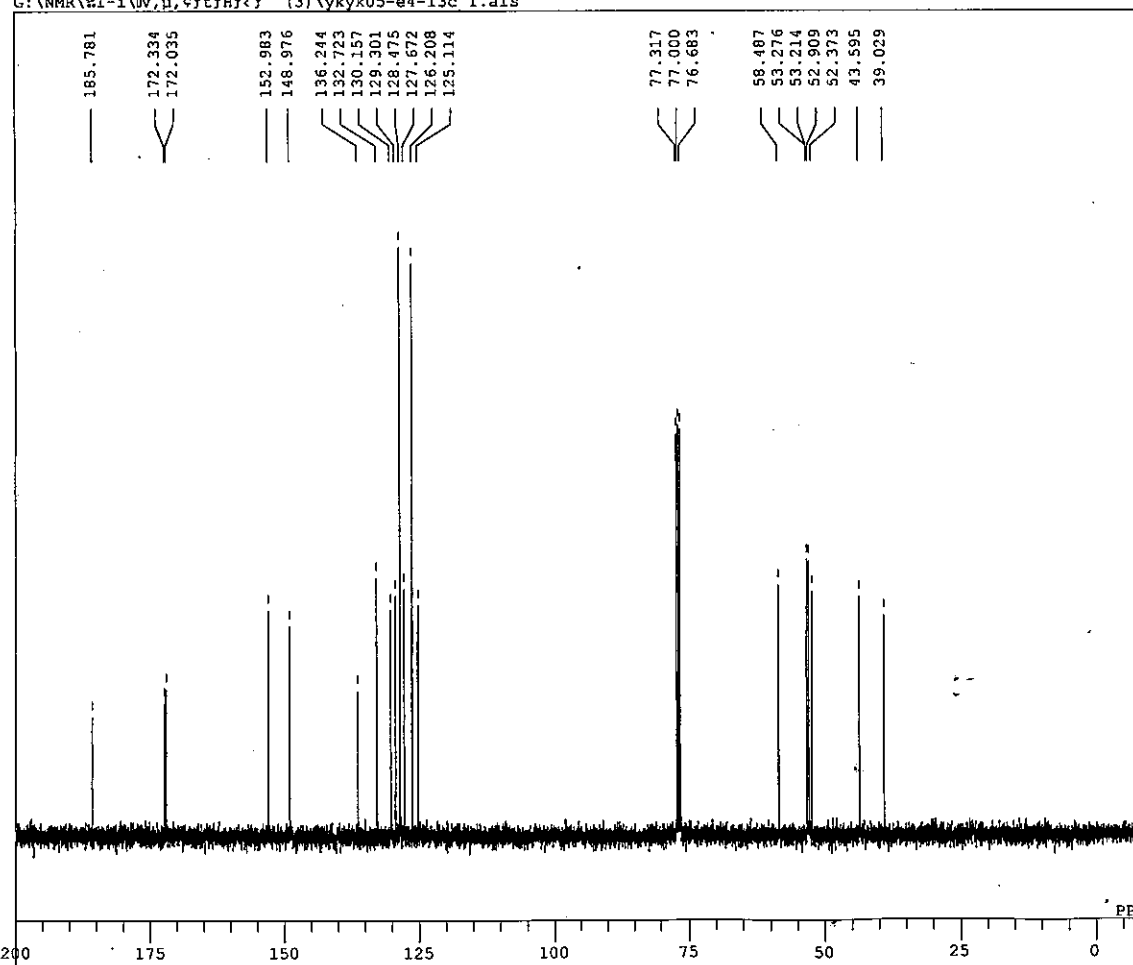

DFILE ykyk05-e4-13c 1.als  
 COMNT ykyk05-e4-13c  
 DATIM 31-MAR-2010 01:47:45  
 OBNUC 13C  
 EXMOD single\_pulse\_dec  
 OBFRQ 100.00 MHz  
 OBSET 536.00 KHz  
 OBFIN 361.11 Hz  
 POINT 65536  
 FREQU 25188.92 Hz  
 SCANS 55  
 ACQTM 2.6018 sec  
 PD 1.5000 sec  
 PW1 3.50 usec  
 IRNUC 1H  
 CTEMP 21.5 c  
 SLVNT CDCL3  
 EXREF 77.00 ppm  
 BF 1.20 Hz  
 RGAIN 24

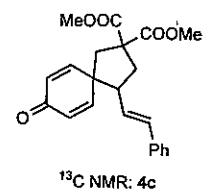

ykyk05-339-1h

G:\NMR\4f-1\ykyk05-339-1h 1.als

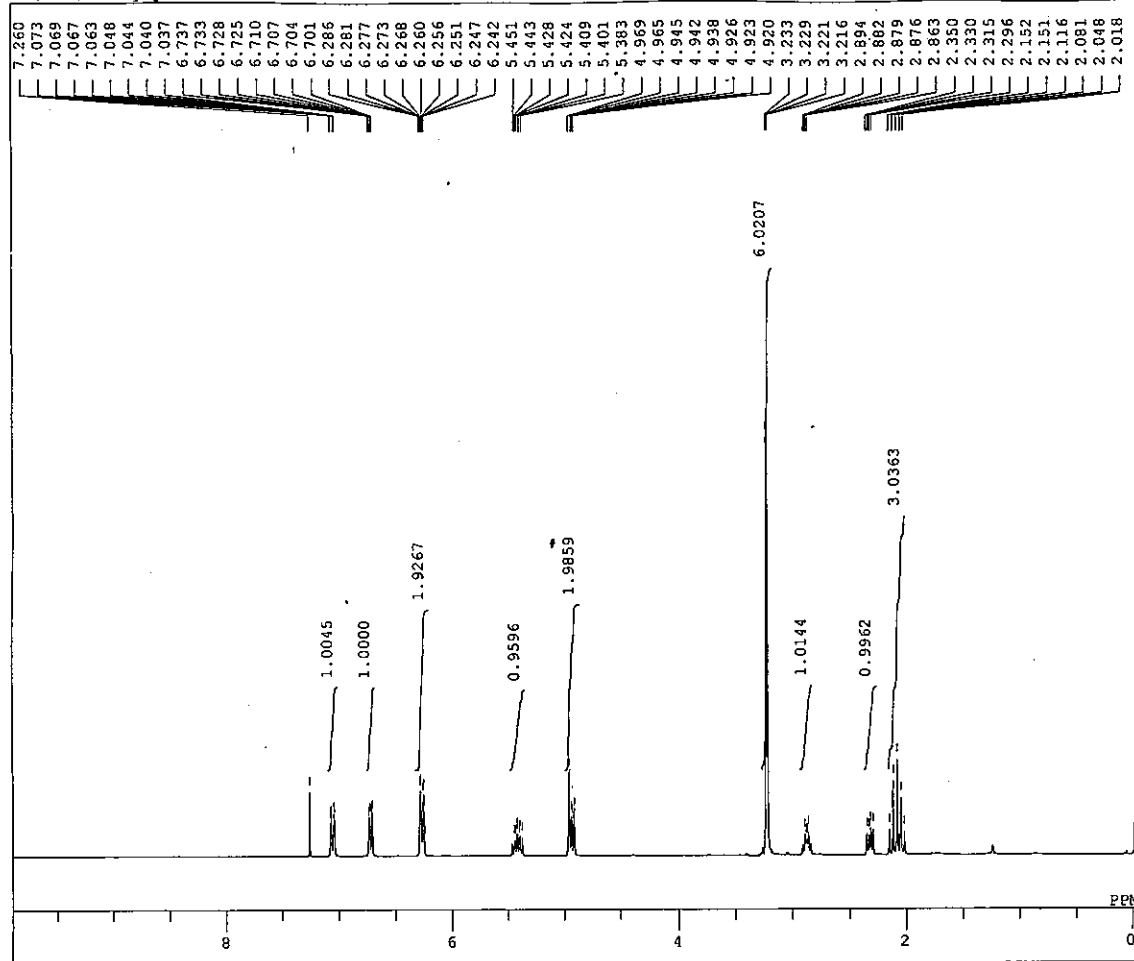

DFILE ykyk05-339-1h 1.als  
COMNT ykyk05-339-1h  
DATIM 31-MAR-2010 05:36:32  
OBNUC 1H  
EXMOD single\_pulse.exp  
OBFRQ 399.00 MHz  
OBSET 784.00 KHz  
OBFIN 597.07 Hz  
POINT 32768  
FREQU 5998.80 Hz  
SCANS 16  
ACQTM 5.4624 sec  
PD 2.0000 sec  
PW1 6.85 usec  
IRNUC 1H  
CTEMP 20.1 c  
SLVNT CDCL3  
EXREF 7.26 ppm  
BF 0.12 Hz  
RGAIN 11

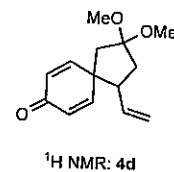

ykyk05-339-13c

G:\NMR\4f-1\ykyk05-339-13c 1.als

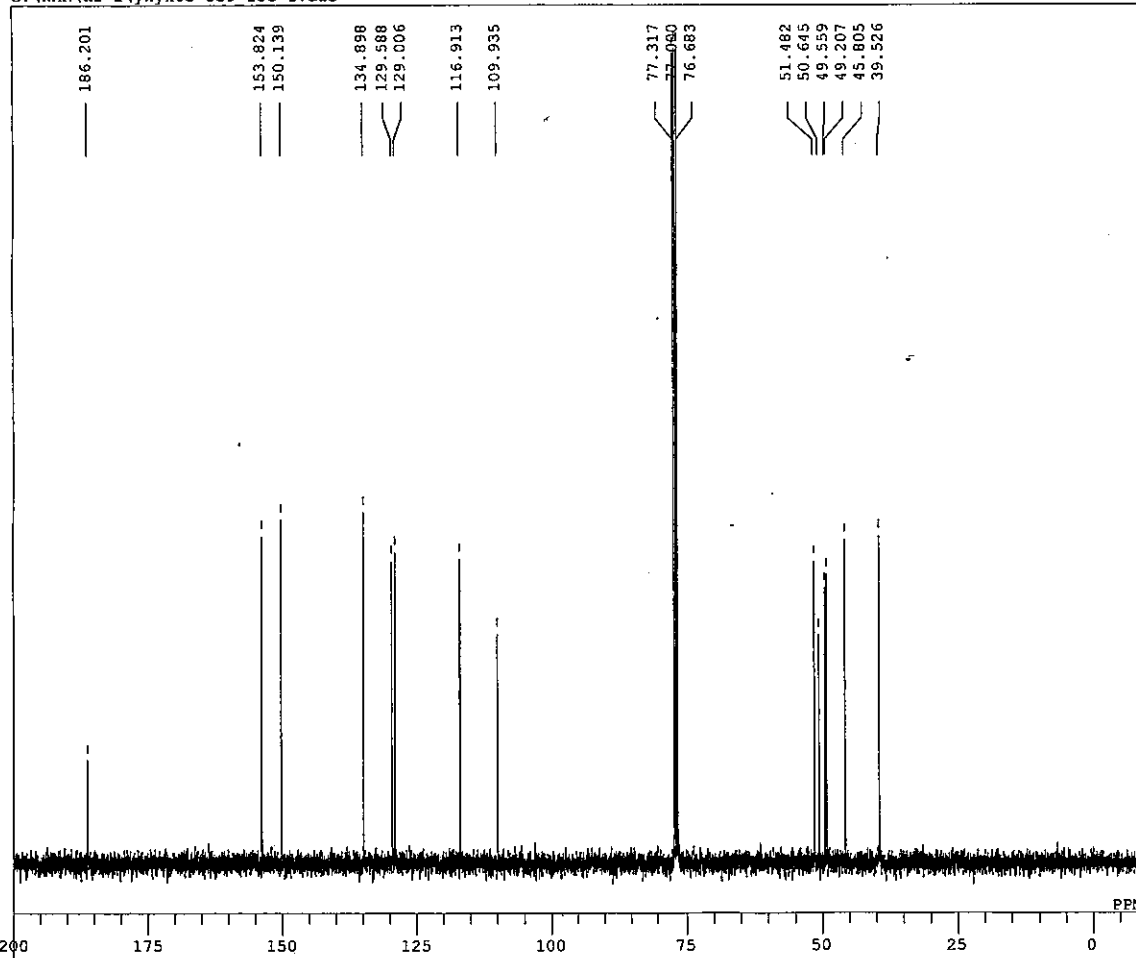

DFILE ykyk05-339-13c 1.als  
COMNT ykyk05-339-13c  
DATIM 31-MAR-2010 05:55:55  
OBNUC 13C  
EXMOD single\_pulse\_dec  
OBFRQ 100.00 MHz  
OBSET 536.00 KHz  
OBFIN 361.11 Hz  
POINT 65536  
FREQU 25188.92 Hz  
SCANS 142  
ACQTM 2.6018 sec  
PD 1.5000 sec  
PW1 3.50 usec  
IRNUC 13C  
CTEMP 21.4 c  
SLVNT CDCL3  
EXREF 77.00 ppm  
BF 1.20 Hz  
RGAIN 23

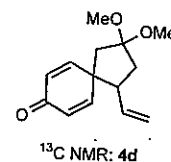

G:\NMR\12&lt;2008"N"x\fi-N\YKYI-05\YKYI-05-358 1.als

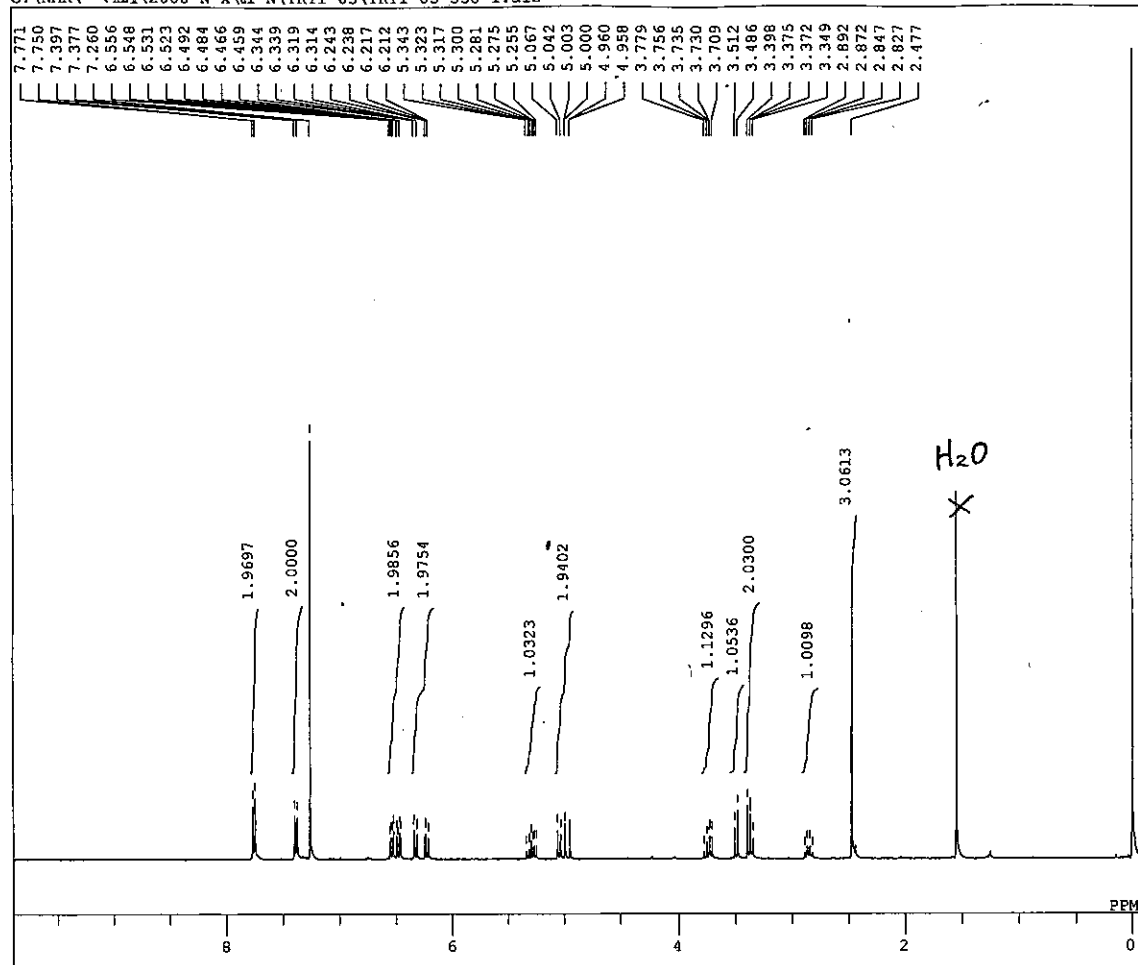

DFILE KYKI-05-358 1.als  
 COMNT KYKI-05-358  
 DATIM 14-MAY-2008 19:59:49  
 OBNUC 1H  
 EXMOD single pulse.exp  
 OBFRQ 399.00 MHz  
 OBSET 784.00 KHz  
 OBFIN 597.07 Hz  
 POINT 32768  
 FREQU 5998.80 Hz  
 SCANS 9  
 ACQTM 5.4624 sec  
 PD 2.0000 sec  
 PW1 6.70 usec  
 IRNUC 1H  
 CTEMP 23.3 c  
 SLVNT CDCL3  
 EXREF 7.26 ppm  
 BF 0.12 Hz  
 RGAIN 27

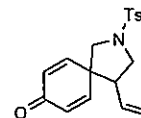<sup>1</sup>H NMR: 4e

## YK-P-NTS-TM-13C

G:\NMR\12&lt;2008"N"x\fi-N\YK-P-NTS-TM-13C.als

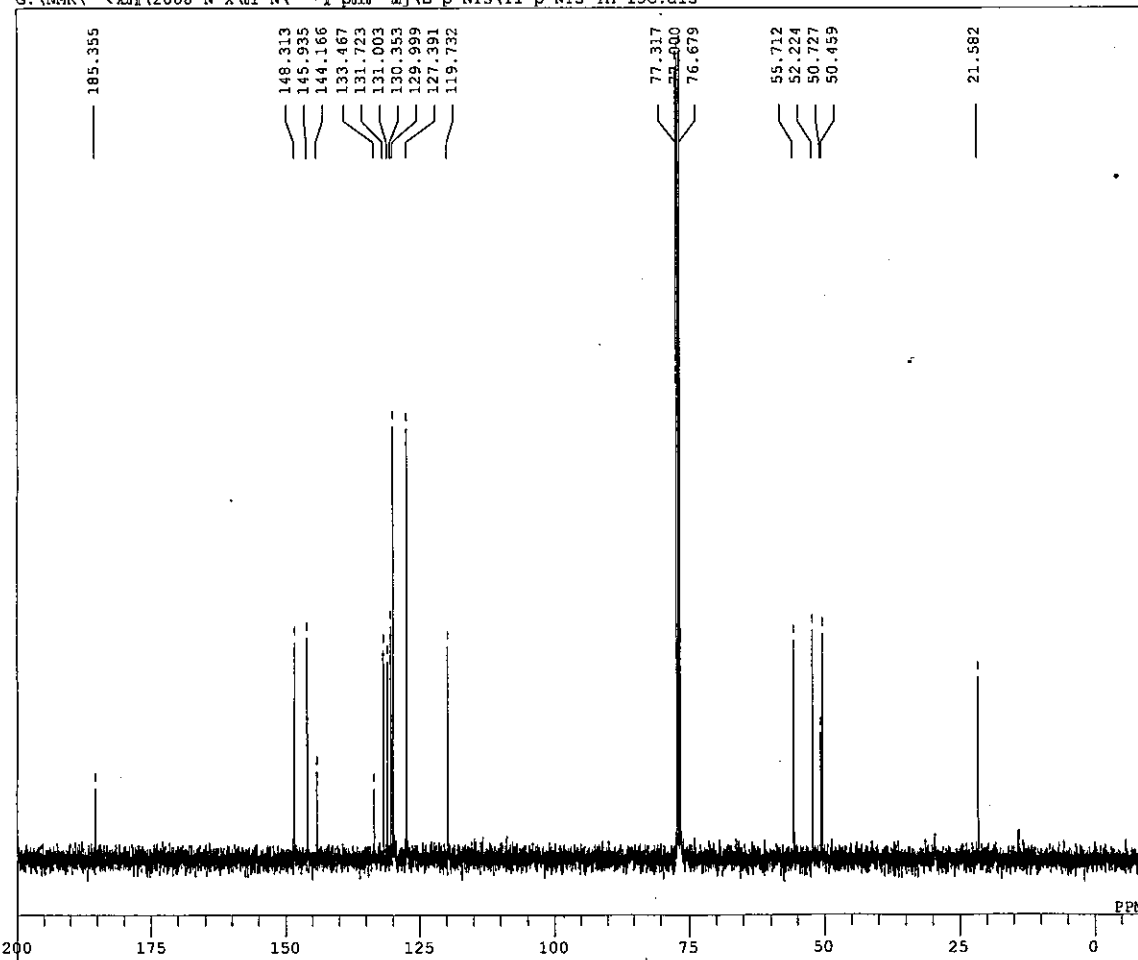

DFILE YI-p-NTS-TM-13C.als  
 COMNT YK-P-NTS-TM-13C  
 DATIM  
 OBNUC 13C  
 EXMOD SINGL-BCM  
 OBFRQ 100.40 MHz  
 OBSET 130.00 KHz  
 OBFIN 5500.00 Hz  
 POINT 65536  
 FREQU 27100.27 Hz  
 SCANS 145  
 ACQTM 2.4183 sec  
 PD 2.0000 sec  
 PW1 4.90 usec  
 IRNUC 1H  
 CTEMP 20.2 c  
 SLVNT CDCL3  
 EXREF 77.00 ppm  
 BF 1.20 Hz  
 RGAIN 23

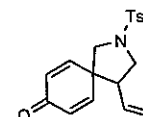<sup>13</sup>C NMR: 4e

## YK-TN-28-17-3-1H

G:\NMR\nemoto\28\YK-TN-28-17-3-1H 1.als

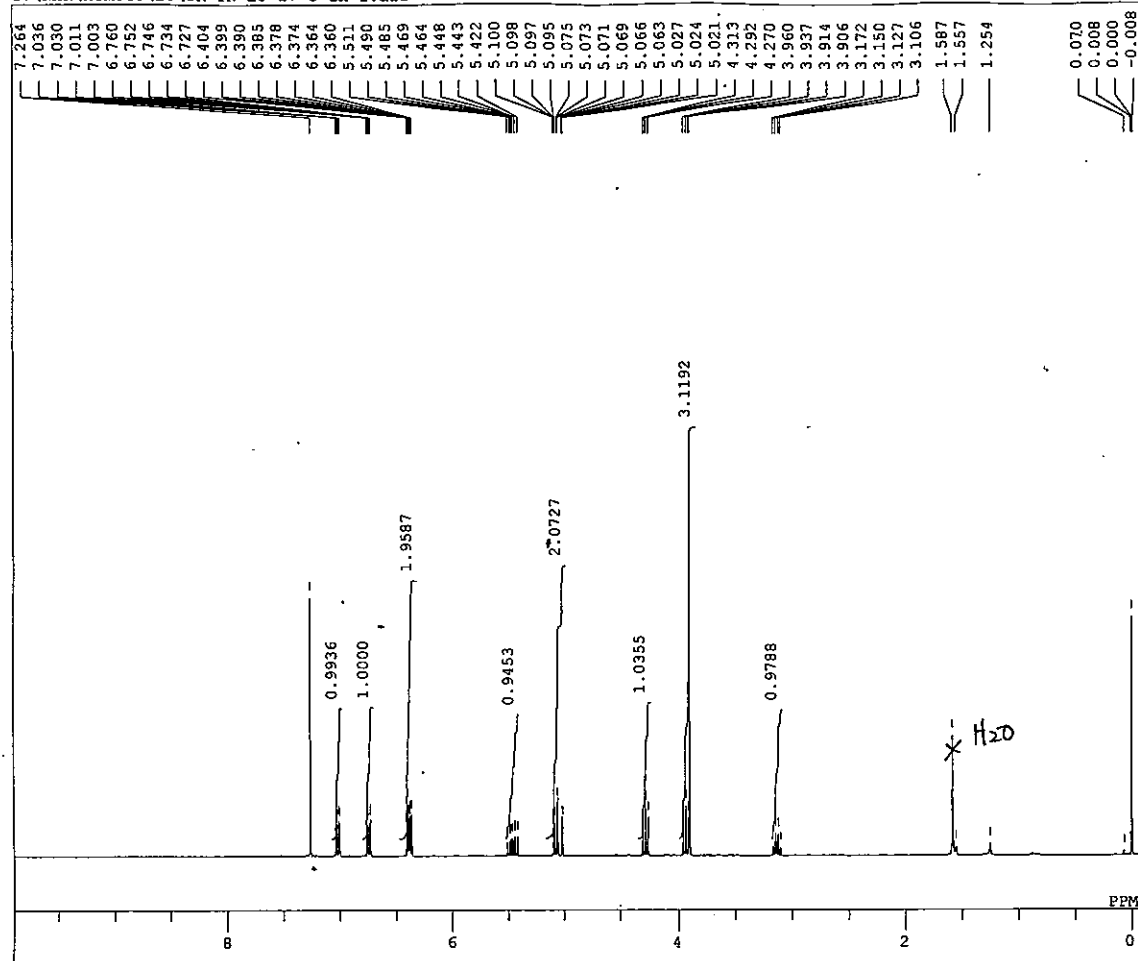

DFILE YK-TN-28-17-3-1H 1.als  
 COMNT YK-TN-28-17-3-1H  
 DATIM 2-OCT-2010 13:46:27  
 OBNUC 1H  
 EXMOD single\_pulse.exp  
 OBFRQ 399.00 MHz  
 OBSET 784.00 KHz  
 OBFIN 597.07 Hz  
 POINT 32768  
 FREQU 5998.80 Hz  
 SCANS 16  
 ACQTM 5.4624 sec  
 PD 2.0000 sec  
 PW1 6.85 usec  
 IRNUC 1H  
 CTEMP 22.5 c  
 SLVNT CDCL3  
 EXREF 0.00 ppm  
 BF 0.12 Hz  
 RGAIN 18

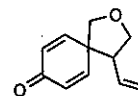<sup>1</sup>H-NMR: 4f

## YK-TN-26-67-13C

G:\NMR\nemoto\26\YK-TN-26-67-13C 1.als

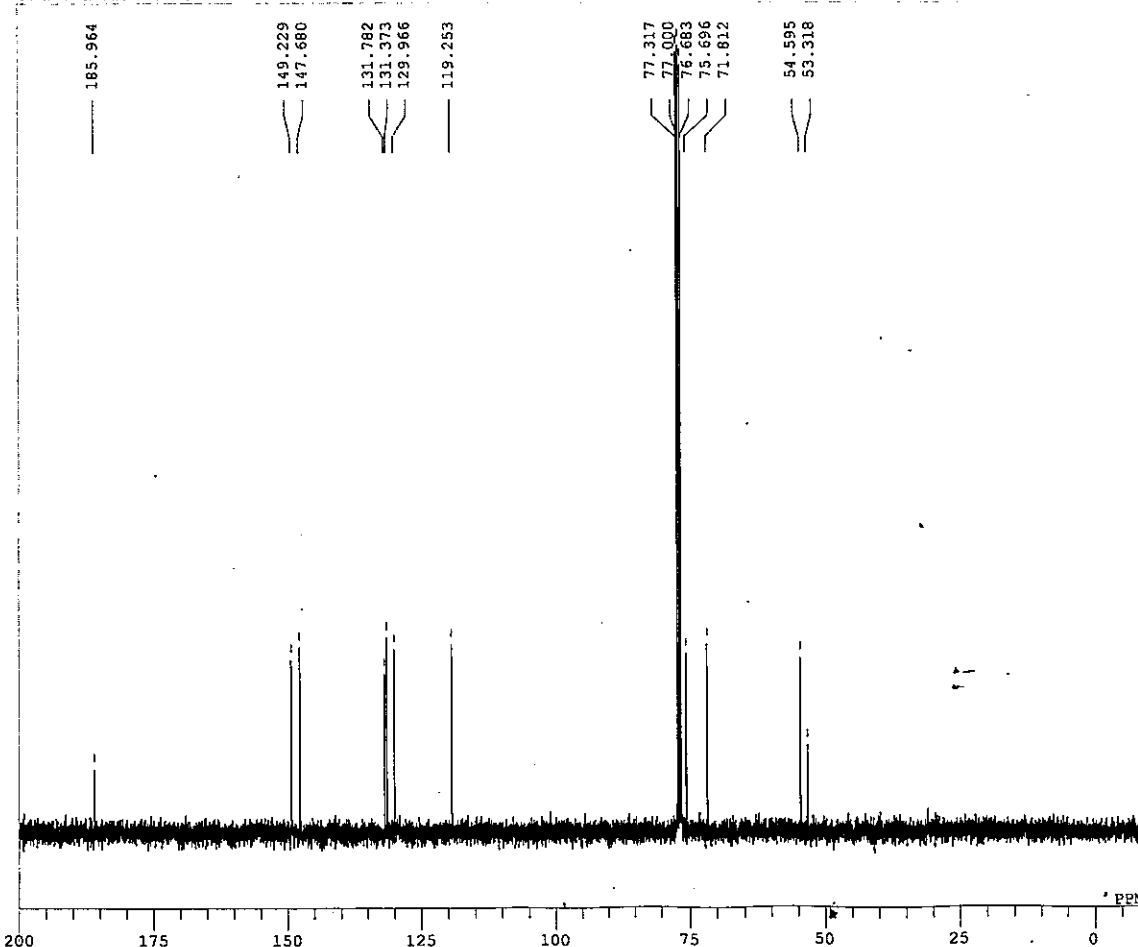

DFILE YK-TN-26-67-13C 1.als  
 COMNT YK-TN-26-67-13C  
 DATIM 14-JUN-2010 19:15:16  
 OBNUC 13C  
 EXMOD single\_pulse\_dec  
 OBFRQ 100.00 MHz  
 OBSET 536.00 KHz  
 OBFIN 361.11 Hz  
 POINT 65536  
 FREQU 25188.92 Hz  
 SCANS 112  
 ACQTM 2.6018 sec  
 PD 1.5000 sec  
 PW1 3.50 usec  
 IRNUC 1H  
 CTEMP 23.0 c  
 SLVNT CDCL3  
 EXREF 77.00 ppm  
 BF 1.20 Hz  
 RGAIN 23

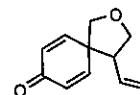<sup>13</sup>C NMR: 4f

# YK-TN-100623-o-Me-pro-1H

NAME: YK-TN-100623-o-Me-pro-1H\_1.sis

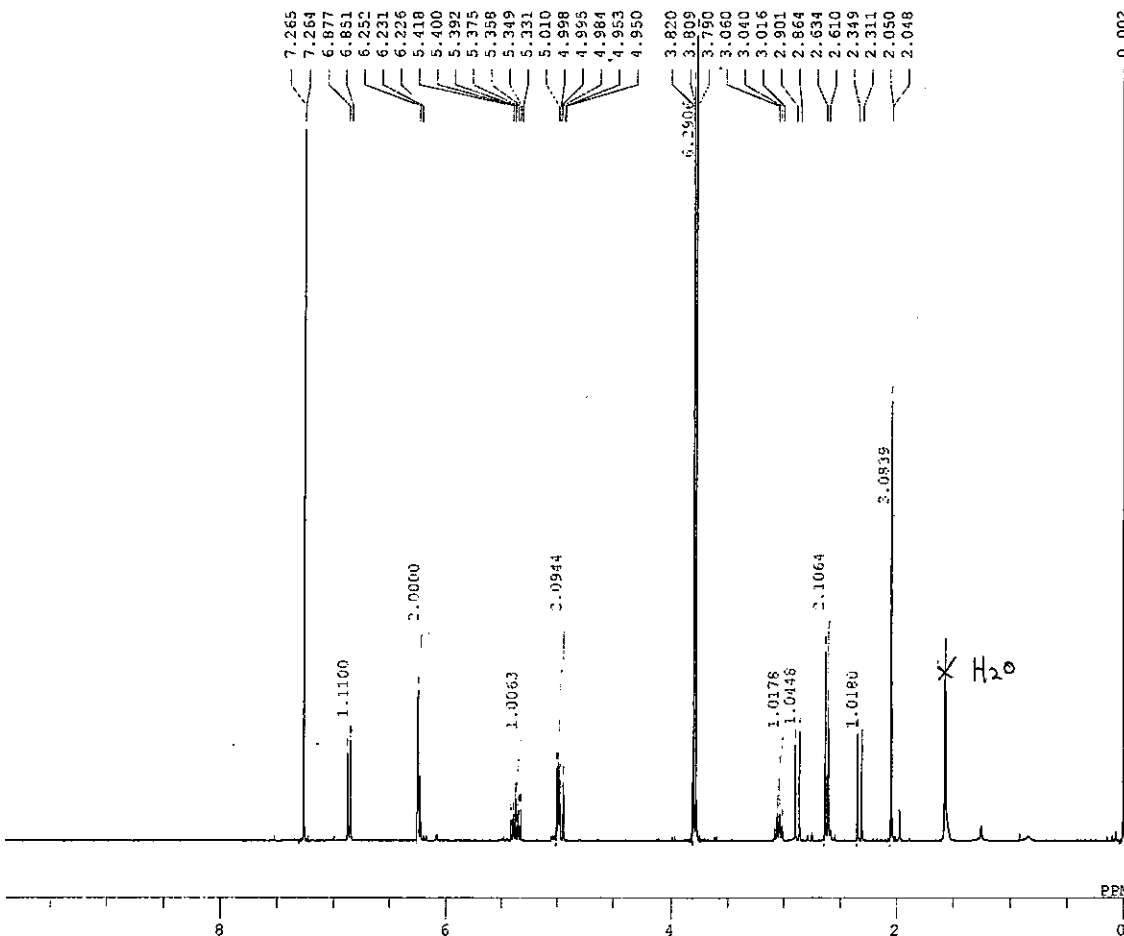

DFILE YK-TN-100623-o-Me-pro-1H\_1.  
COMNT YK-TN-100623-o-Me-pro-1H  
DATIM 24-JUN-2010 02:23:50  
OBNUC 1H  
EXMOD single\_pulse.exp  
OBFRQ 399.00 MHz  
OBSET 784.00 KHz  
OBFIN 597.07 Hz  
POINT 32768  
FREQU 5998.80 Hz  
SCANS 7  
ACQTM 5.4624 sec  
PD 2.0000 sec  
PWL 6.85 usec  
IRNUC 1H  
CTEMP 21.8 c  
SLVNT CDCL3  
EXREF 0.00 ppm  
BF 0.12 Hz  
RGAIN 19

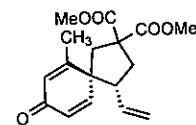

<sup>1</sup>H-NMR: 4g

Inseparable  
diastereo-mixture

# YK-TN-100623-o-Me-pro-13C

NAME: YK-TN-100623-o-Me-pro-13C\_1.sis

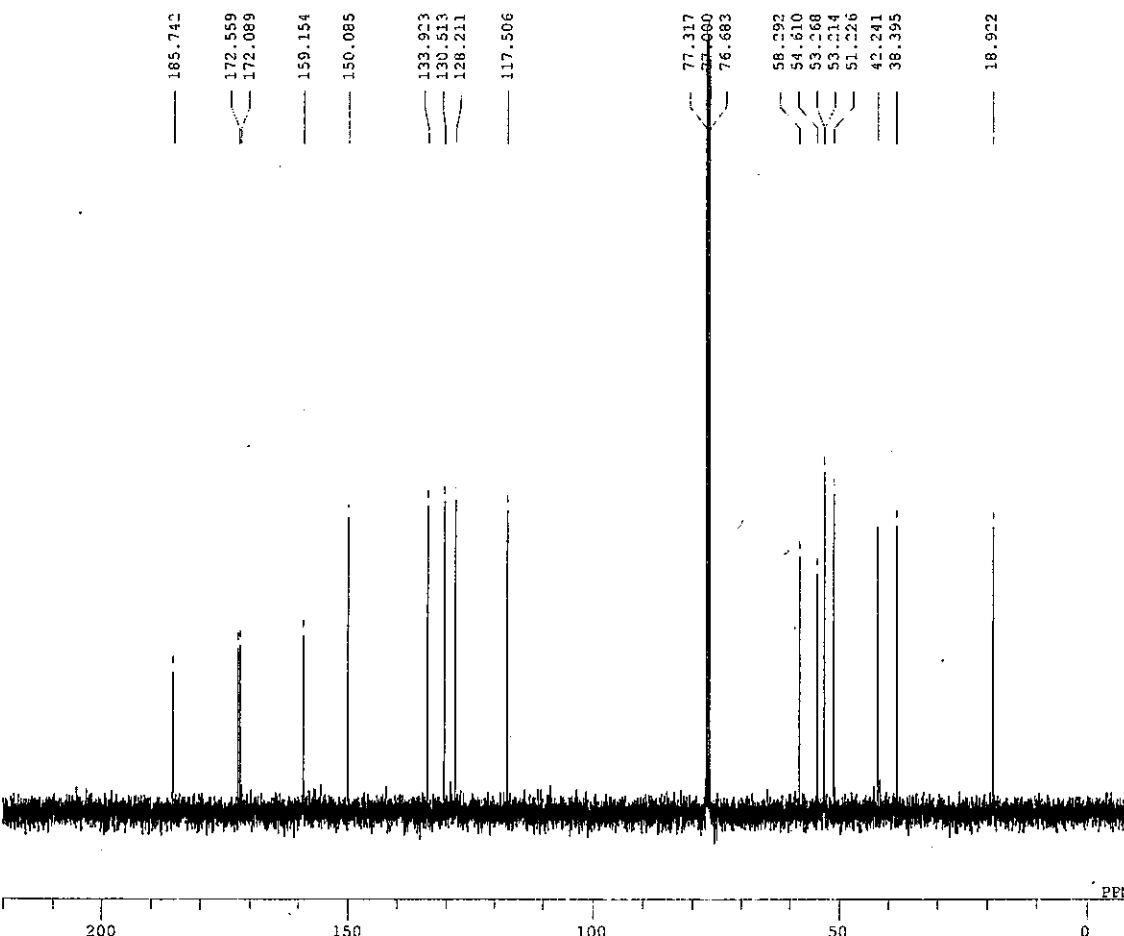

DFILE YK-TN-100623-o-Me-pro-13C\_1  
COMNT YK-TN-100623-o-Me-pro-13C  
DATIM 24-JUN-2010 02:31:29  
OBNUC 13C  
EXMOD single\_pulse\_dec  
OBFRQ 100.00 MHz  
OBSET 536.00 KHz  
OBFIN 361.11 Hz  
POINT 65536  
FREQU 25188.92 Hz  
SCANS 65  
ACQTM 2.6018 sec  
PD 1.5000 sec  
PWL 3.50 usec  
IRNUC 1H  
CTEMP 22.9 c  
SLVNT CDCL3  
EXREF 77.00 ppm  
BF 1.20 Hz  
RGAIN 24

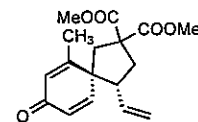

<sup>13</sup>C NMR: 4g

page 5-38



# YK-TN-100624-Cl-1H

G:\NMR\demote\27\YK-TN-100624-Cl-1H\_1.als

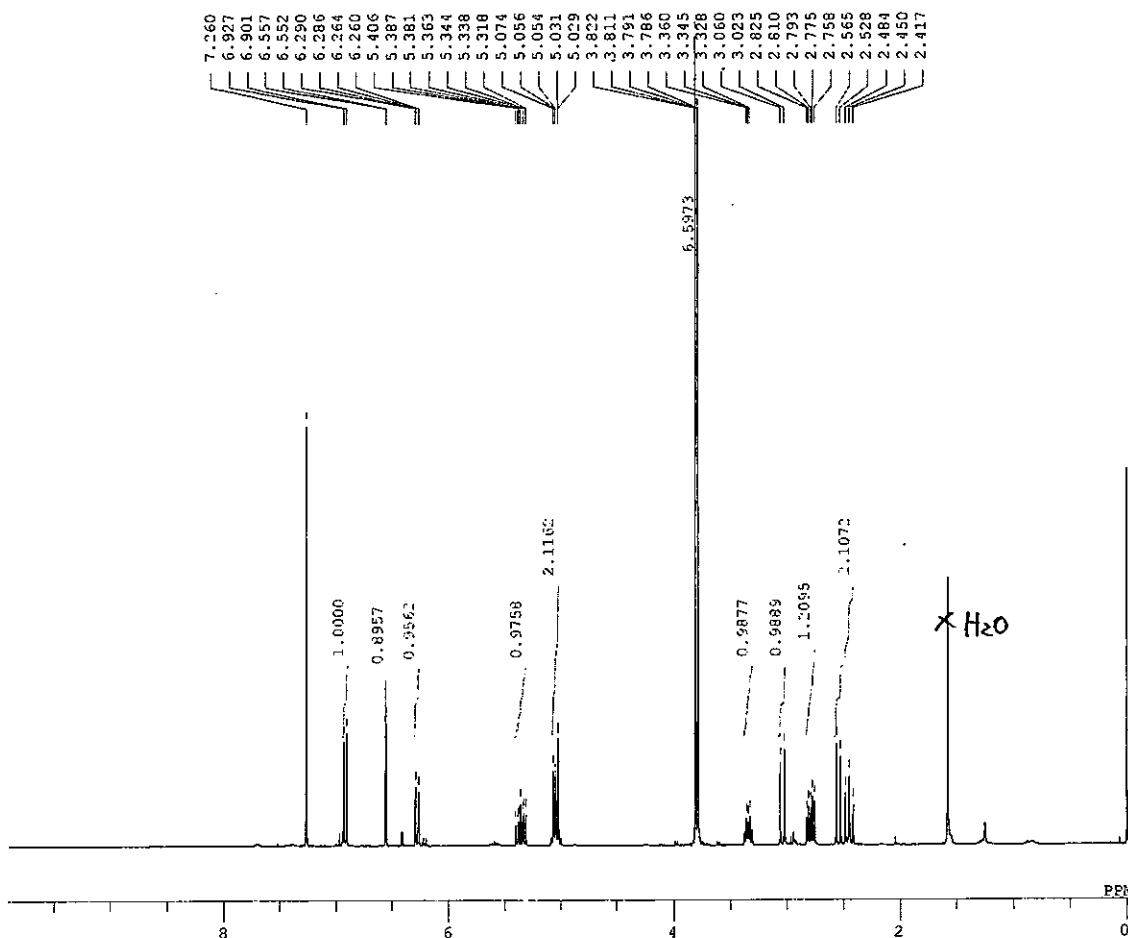

DFILE YK-TN-100624-Cl-1H\_1.als  
COMNT YK-TN-100624-Cl-1H  
DATIM 24-JUN-2010 22:36:12  
OBNUC 1H  
EXMOD single\_pulse.exp  
OBFRQ 399.00 MHz  
OBSET 784.00 KHz  
OBFIN 597.07 Hz  
POINT 32768  
FREQU 5998.80 Hz  
SCANS 9  
ACQTM 5.4624 sec  
PD 2.0000 sec  
PW1 6.85 usec  
IRNUC 1H  
CTEMP 21.1 c  
SLVNT CDCL3  
EXREF 7.26 ppm  
BF 0.12 Hz  
RGAIN 18

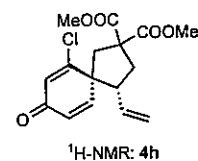

Inseparable  
diastereo-mixture

# YK-TN-100624-Cl-13C

G:\NMR\demote\27\YK-TN-100624-Cl-13C\_1.als

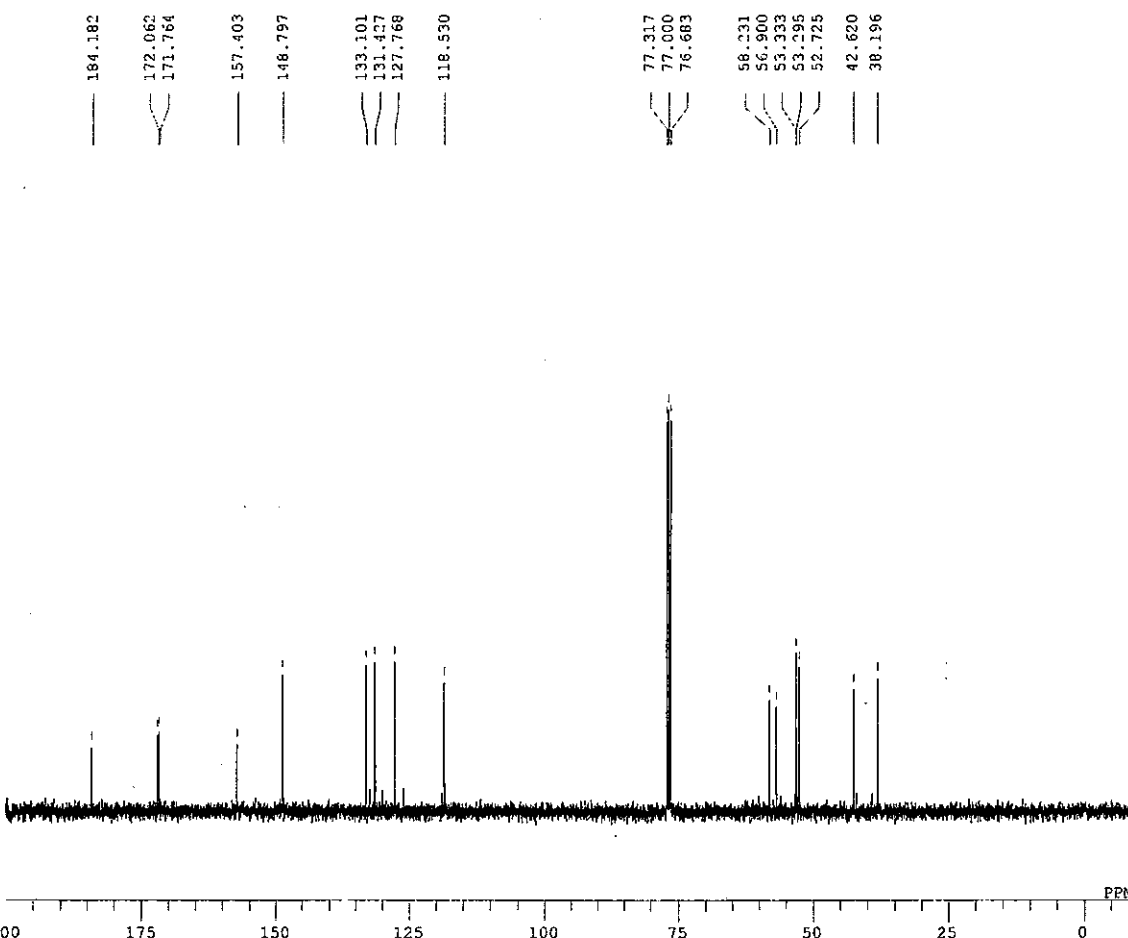

DFILE YK-TN-100624-Cl-13C\_1.als  
COMNT YK-TN-100624-Cl-13C  
DATIM 24-JUN-2010 22:43:57  
OBNUC 13C  
EXMOD single\_pulse\_dec  
OBFRQ 100.00 MHz  
OBSET 536.00 KHz  
OBFIN 361.11 Hz  
POINT 65536  
FREQU 25188.92 Hz  
SCANS 48  
ACQTM 2.6018 sec  
PD 1.5000 sec  
PW1 3.50 usec  
IRNUC 13C  
CTEMP 22.1 c  
SLVNT CDCL3  
EXREF 77.00 ppm  
BF 1.20 Hz  
RGAIN 24

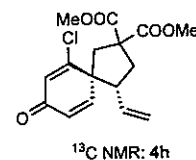

# YK-TN-27-100627-1H

3:ANMRAnemoto\27\YK-TN-27-100627-1H\_1.als

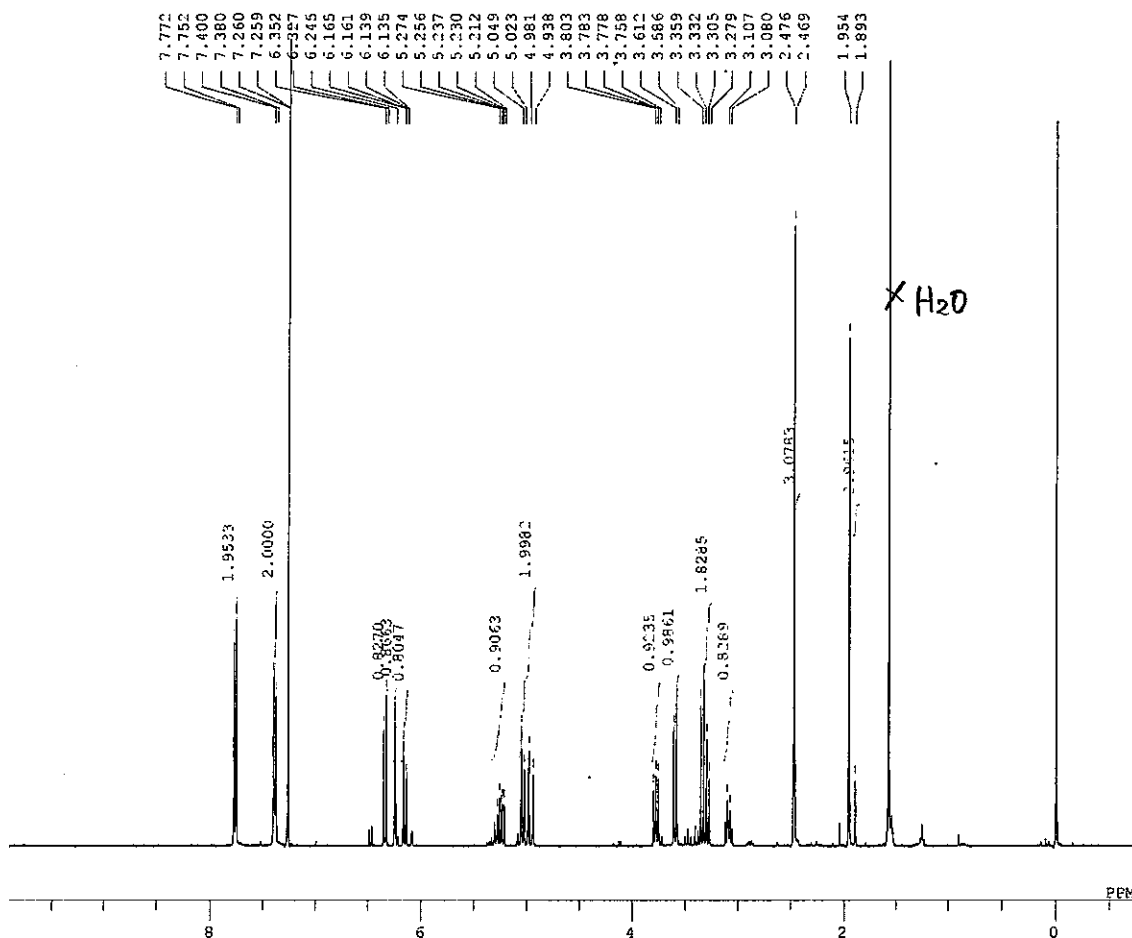

DFILE YK-TN-27-100627-1H\_1.als  
COMNT YK-TN-27-100627-1H  
DATIM 28-JUN-2010 01:47:40  
OBNUC 1H  
EXMOD single pulse.exp  
OBFRQ 399.00 MHz  
OBSET 784.00 KHz  
OBFIN 597.07 Hz  
POINT 32768  
FREQU 5998.80 Hz  
SCANS 8  
ACQTM 5.4624 sec  
PD 2.0000 sec  
PWL 6.85 usec  
IRNUC 1H  
CTEMP 22.9 c  
SLVNT CDCL3  
EXREF 7.26 ppm  
BF 0.12 Hz  
RGAIN 19

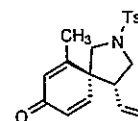

<sup>1</sup>H-NMR: 4i

Inseparable  
diastereo-mixture

# YK-TN-27-100627-13C

3:ANMRAnemoto\27\YK-TN-27-100627-13C\_1.als

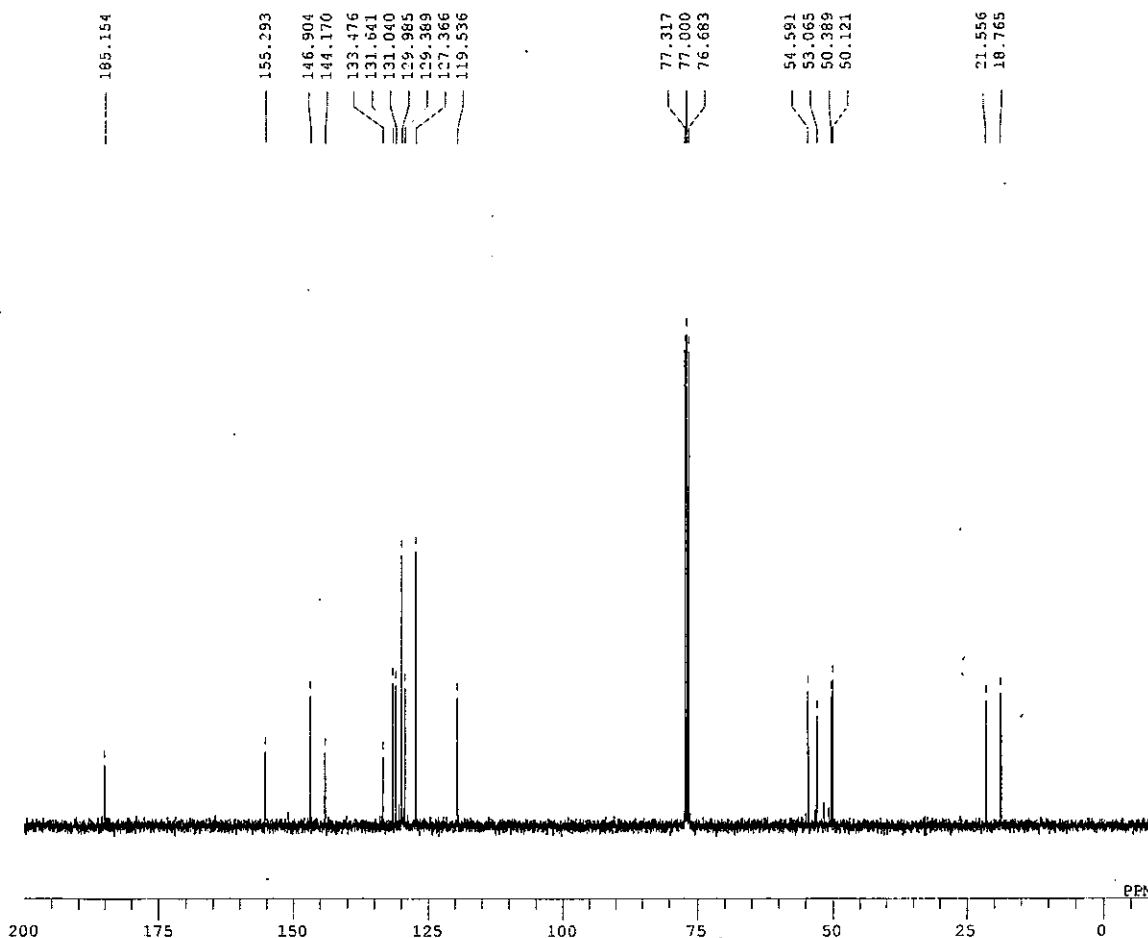

DFILE YK-TN-27-100627-13C\_1.als  
COMNT YK-TN-27-100627-13C  
DATIM 28-JUN-2010 01:43:03  
OBNUC 13C  
EXMOD single pulse dec  
OBFRQ 100.00 MHz  
OBSET 536.00 KHz  
OBFIN 361.11 Hz  
POINT 65536  
FREQU 25188.92 Hz  
SCANS 139  
ACQTM 2.6018 sec  
PD 1.5000 sec  
PWL 3.50 usec  
IRNUC 13C  
CTEMP 24.1 c  
SLVNT CDCL3  
EXREF 77.00 ppm  
BF 1.20 Hz  
RGAIN 24

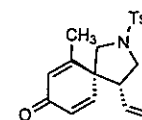

<sup>13</sup>C NMR: 4i

page 5-40

G:\NMF\memote\27\VF-TW-100e23-nach-pro-14 1.xls

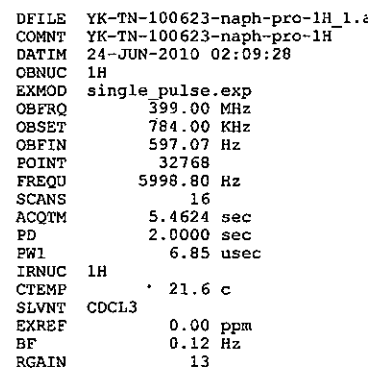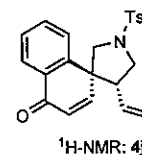

## G:\NMR\remote\27\_MF-Td-1992-graph-pro-130\_1.xls

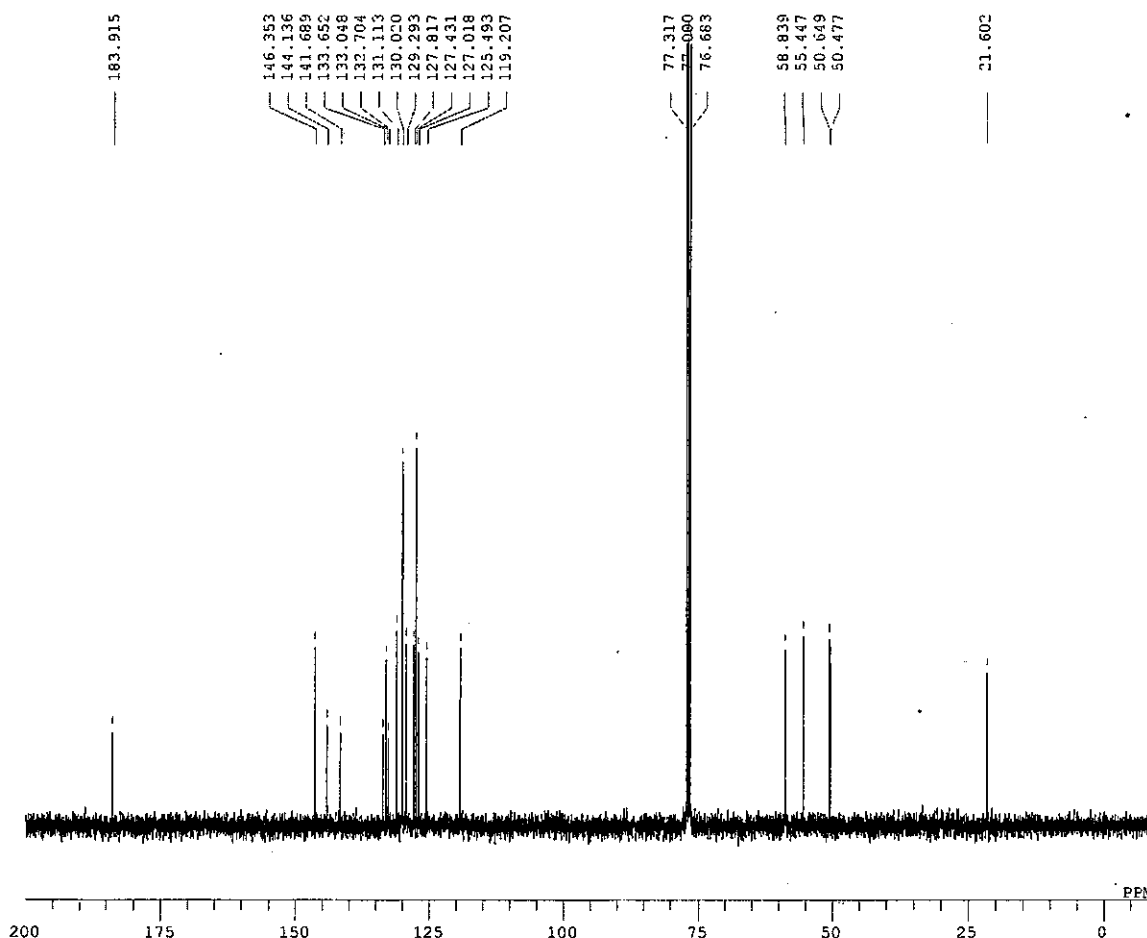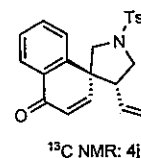

# YKMY-12-481-PRODUCT-1H

G:\NMR\q" c\spiro data\YKMY-12-481-PRODUCT-1H 1.als

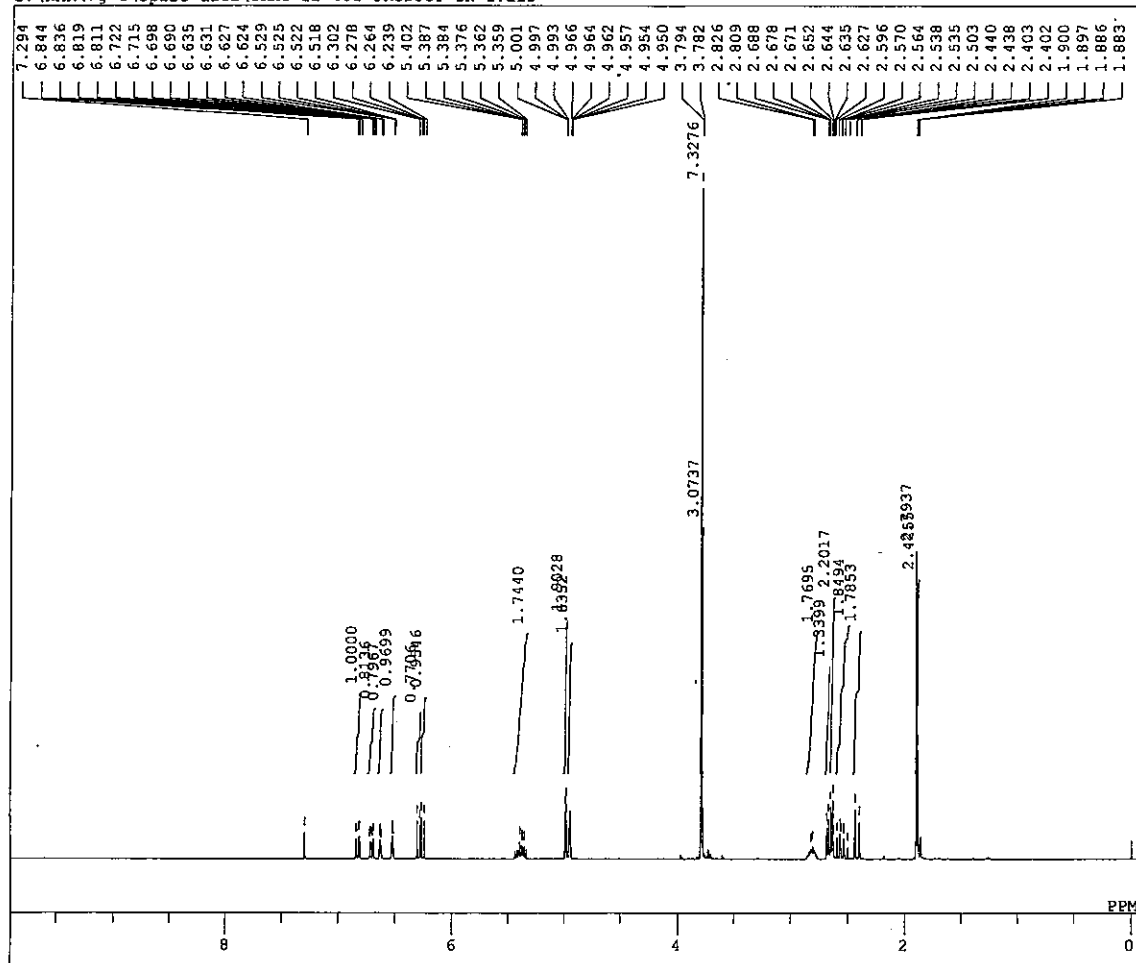

DFILE YKMY-12-481-PRODUCT-1H 1.als  
COMNT YKMY-12-481-PRODUCT-1H  
DATIM 20-JUL-2010 18:41:09  
OBNUC 1H  
EXMOD single pulse.exp  
OBFRQ 399.00 MHz  
OBSET 784.00 KHz  
OBFIN 597.07 Hz  
POINT 32768  
FREQU 5998.80 Hz  
SCANS 16  
ACQTM 5.4624 sec  
PD 2.0000 sec  
PWL 6.85 usec  
IRNUC 1H  
CTEMP 22.3 c  
SLVNT CDCL3  
EXREF 0.00 ppm  
BF 0.12 Hz  
RGAIN 9

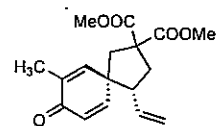

<sup>1</sup>H NMR: 4k

Inseparable  
diastereo-mixture

# YKMY-12-481-PRODUCT-13C

G:\NMR\q" c\spiro data\YKMY-12-481-PRODUCT-13C 1.als

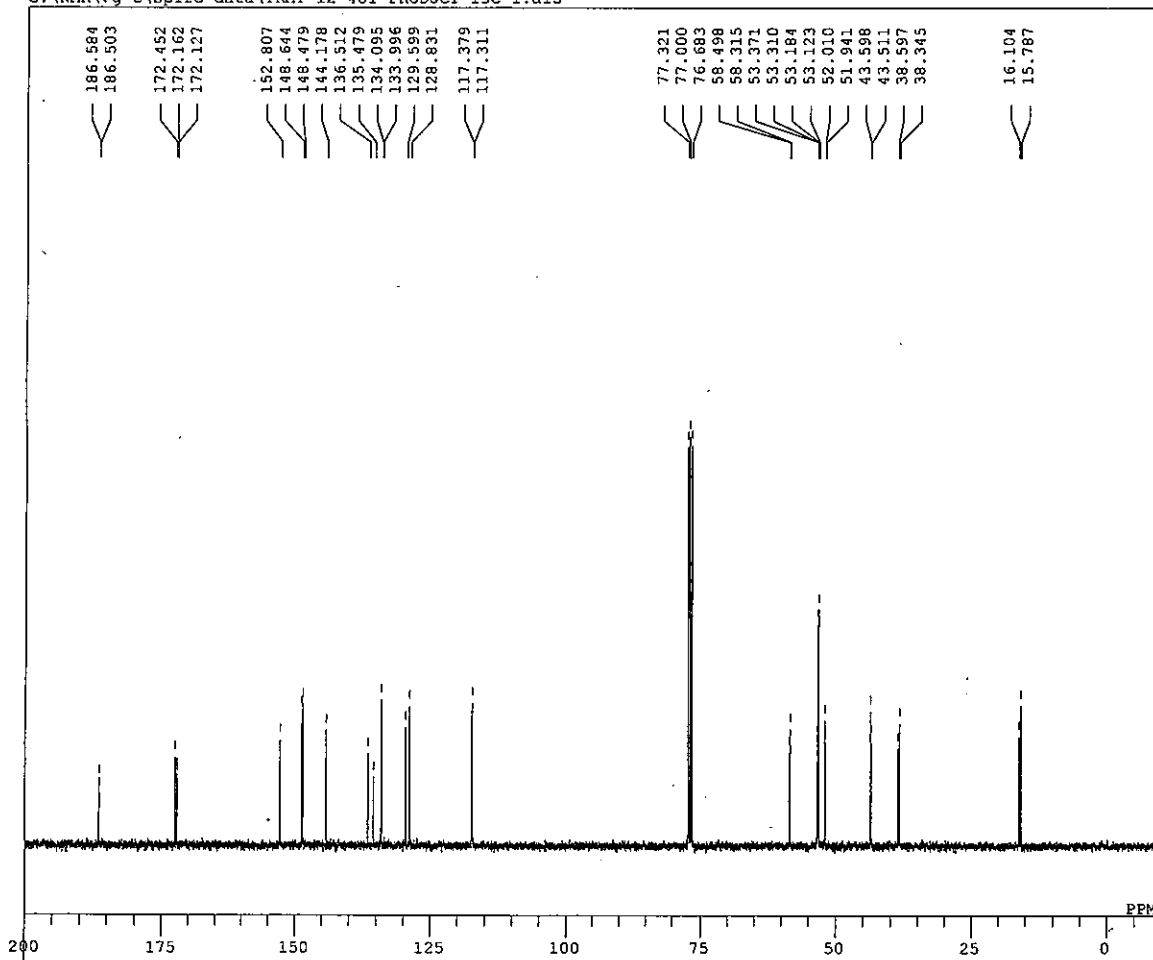

DFILE YKMY-12-481-PRODUCT-13C 1.a  
COMNT YKMY-12-481-PRODUCT-13C  
DATIM 20-JUL-2010 18:56:27  
OBNUC 13C  
EXMOD single pulse dec  
OBFRQ 100.00 MHz  
OBSET 536.00 KHz  
OBFIN 361.11 Hz  
POINT 65536  
FREQU 25188.92 Hz  
SCANS 184  
ACQTM 2.6018 sec  
PD 1.5000 sec  
PWL 3.50 usec  
IRNUC 1H  
CTEMP 23.2 c  
SLVNT CDCL3  
EXREF 77.00 ppm  
BF 1.20 Hz  
RGAIN 23

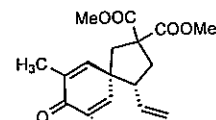

<sup>13</sup>C NMR: 4k

G:\NMR\yf-1\ykyk06-in6 1.als

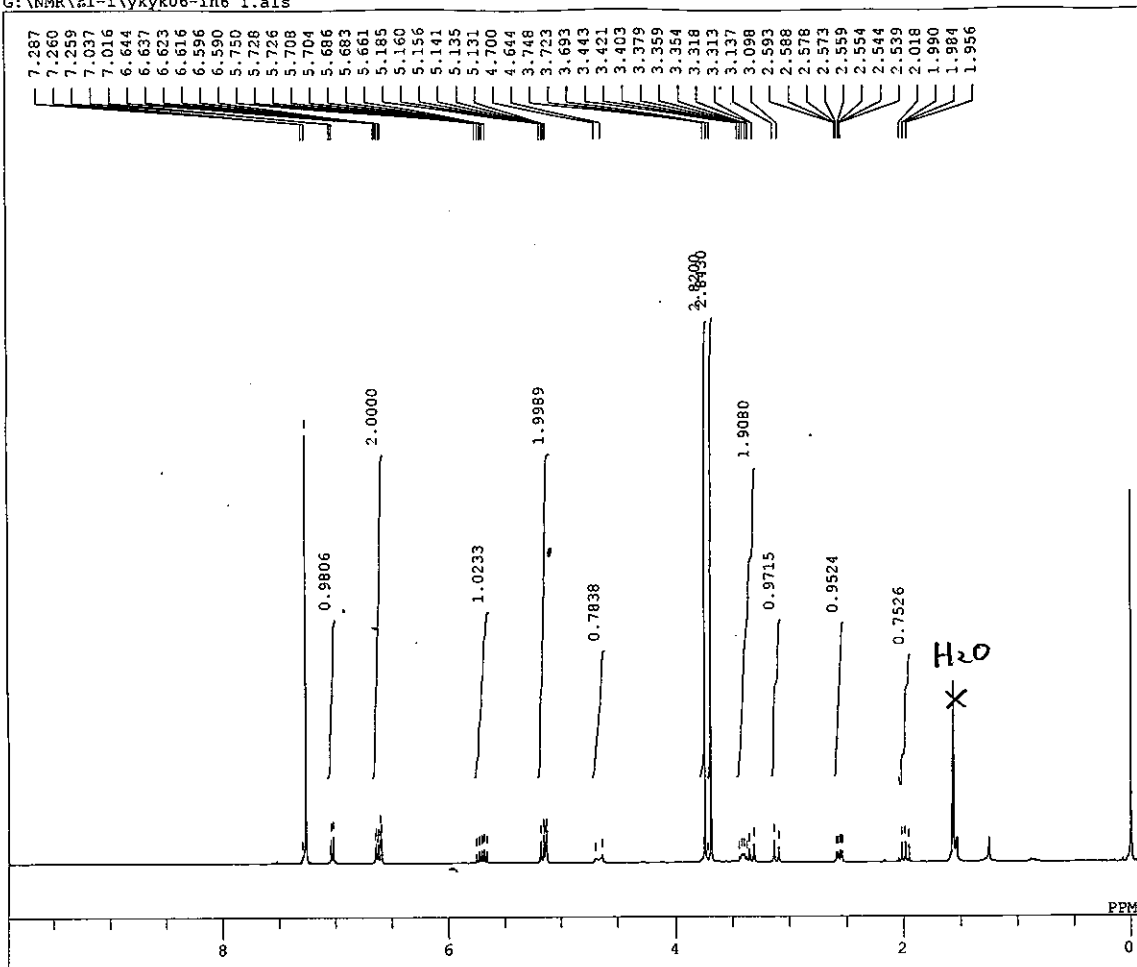

DFILE ykyk06-in6 1.als  
 COMNT ykyk06-in6  
 DATIM 1-OCT-2010 19:25:47  
 OBNUC 1H  
 EXMOD single\_pulse.exp  
 OBFRQ 399.00 MHz  
 OBSET 784.00 KHz  
 OBFIN 597.07 Hz  
 POINT 32768  
 FREQU 5998.80 Hz  
 SCANS 16  
 ACQTM 5.4624 sec  
 PD 2.0000 sec  
 PW1 6.85 usec  
 IRNUC 1H  
 CTEMP 22.1 c  
 SLVNT CDCL3  
 EXREF 7.26 ppm  
 BF 0.12 Hz  
 RGAIN 21

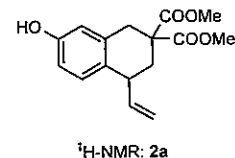

## YK-TN-100621-13C

G:\NMR\nemoto\27\YK-TN-100621-13C 1.als

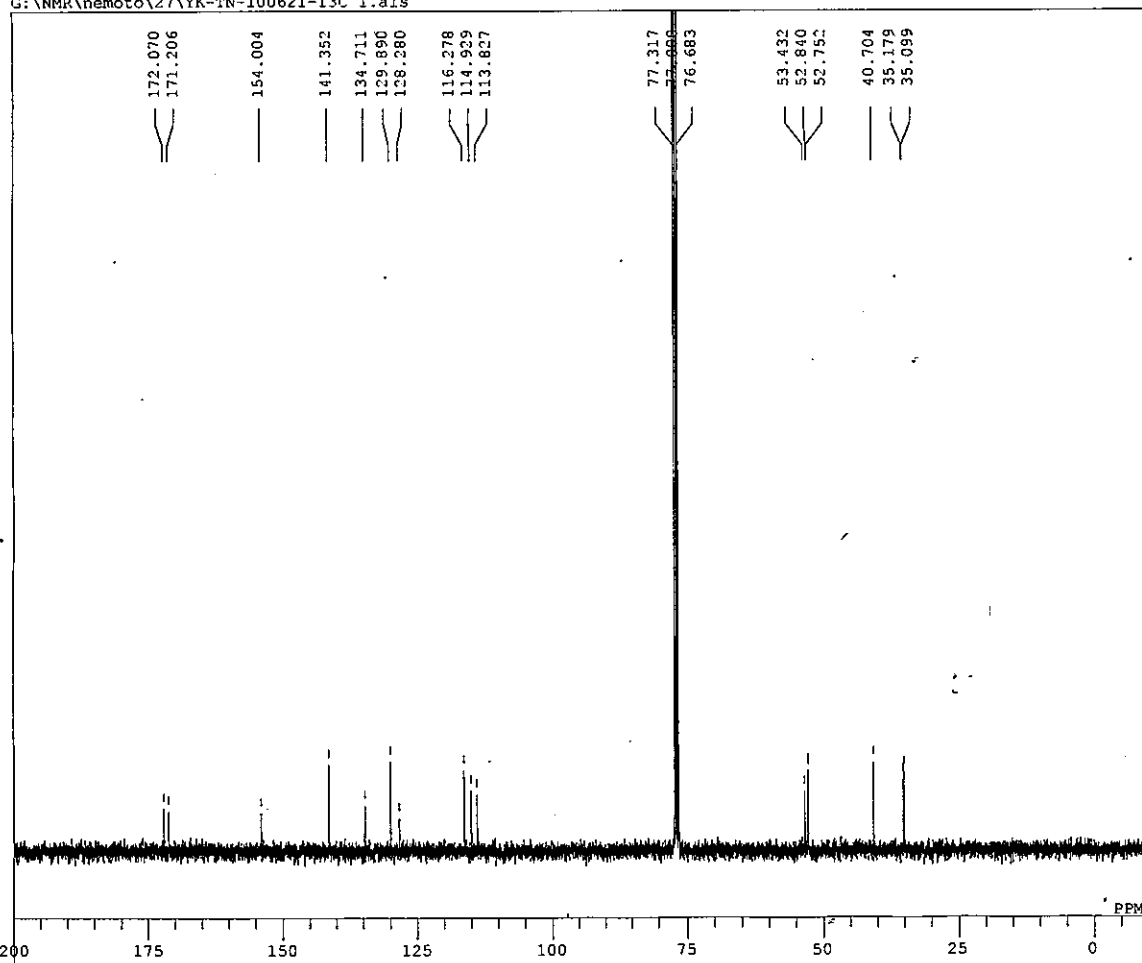

DFILE YK-TN-100621-13C 1.als  
 COMNT YK-TN-100621-13C  
 DATIM 21-JUN-2010 19:43:04  
 OBNUC 13C  
 EXMOD single\_pulse\_dec  
 OBFRQ 100.00 MHz  
 OBSET 536.00 KHz  
 OBFIN 361.11 Hz  
 POINT 65536  
 FREQU 25188.92 Hz  
 SCANS 280  
 ACQTM 2.6018 sec  
 PD 1.5000 sec  
 PW1 3.50 usec  
 IRNUC 1H  
 CTEMP 24.9 c  
 SLVNT CDCL3  
 EXREF 77.00 ppm  
 BF 1.20 Hz  
 RGAIN 24

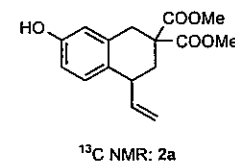

# YKYI-m-mal-TM-A-1H

G:\NMR\12\2008\N\X\I-N\ - \*f-pdi0-Uj\D m-malonate\YI-m-malonate-TM-A-1H 1.als

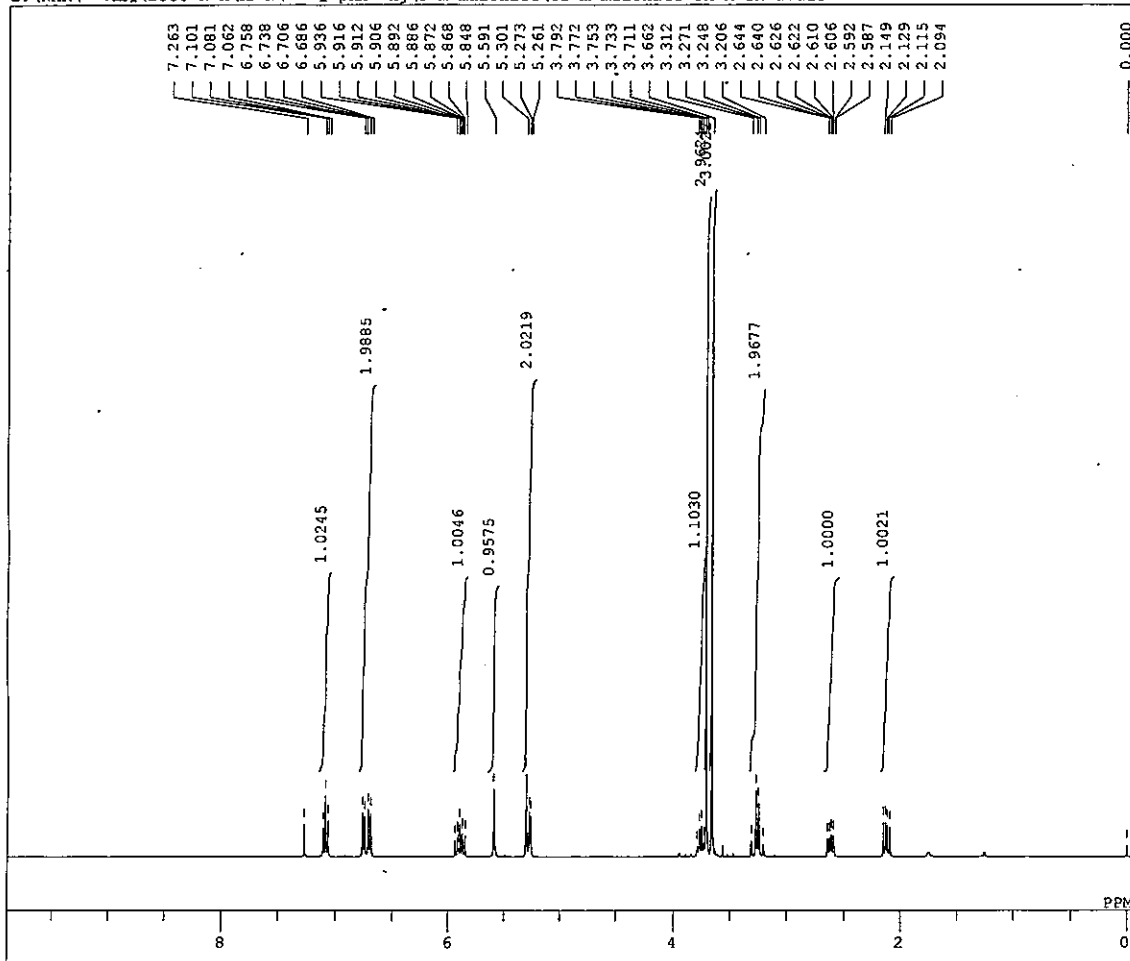

DFILE YI-m-malonate-TM-A-1H\_1.als  
COMNT KYKI-m-mal-TM-A-1H  
DATIM 29-NOV-2008 15:37:18  
OBNUC 1H  
EXMOD single\_pulse.exp  
OBFRQ 399.00 MHz  
OBSET 784.00 KHz  
OBFIN 597.07 Hz  
POINT 32768  
FREQU 5998.80 Hz  
SCANS 16  
ACQTM 5.4624 sec  
PD 2.0000 sec  
PW1 6.70 usec  
IRNUC 1H  
CTEMP 18.5 c  
SLVNT CDCL3  
EXREF 0.00 ppm  
BF 0.12 Hz  
RGAIN 11

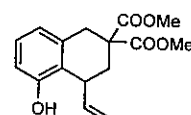

<sup>1</sup>H-NMR: 2b

# YKYI-m-mal-TM-A-13C

G:\NMR\12\2008\N\X\I-N\ - \*f-pdi0-Uj\D m-malonate\YI-m-malonate-TM-A-13C 1.als

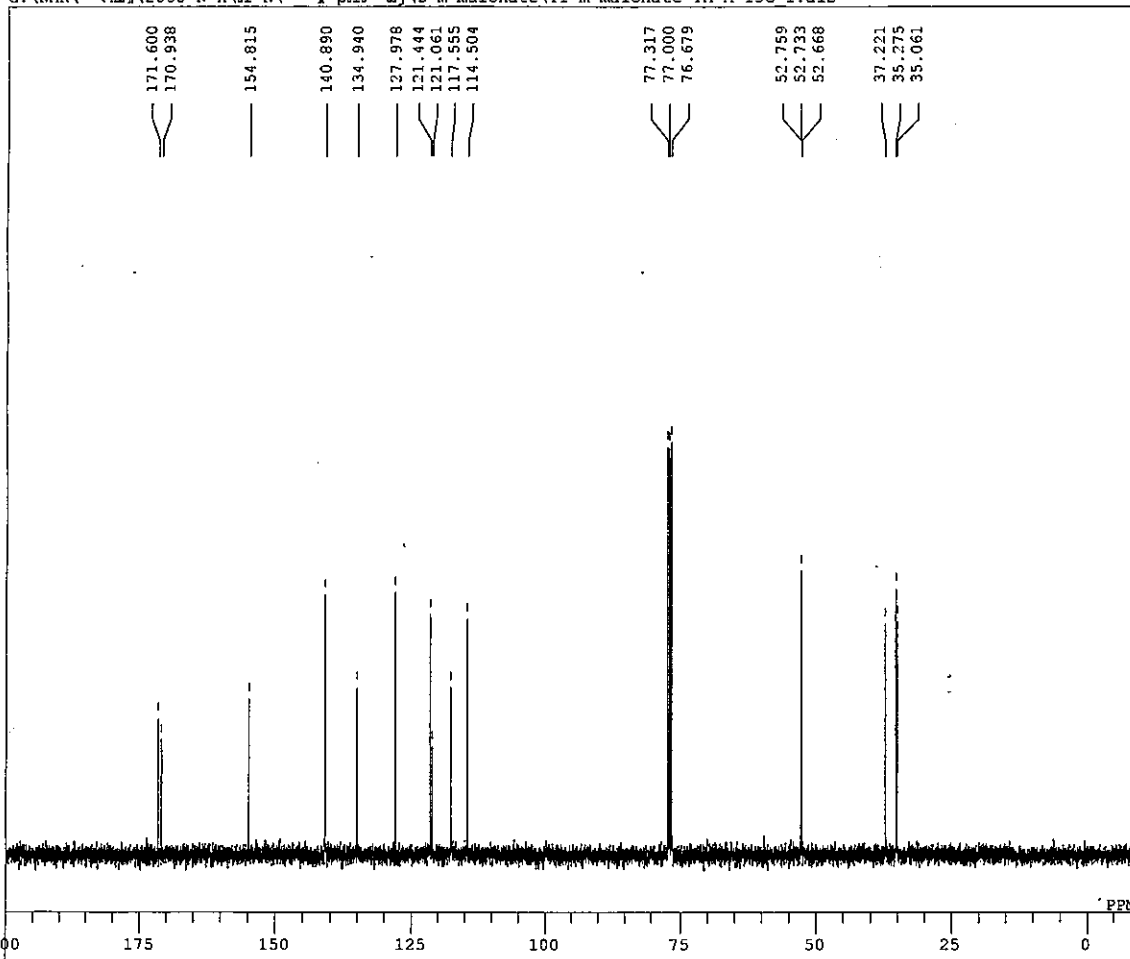

DFILE YI-m-malonate-TM-A-13C\_1.als  
COMNT KYKI-m-mal-TM-A-13C  
DATIM 29-NOV-2008 15:41:46  
OBNUC 13C  
EXMOD single\_pulse\_dec  
OBFRQ 100.00 MHz  
OBSET 536.00 KHz  
OBFIN 361.11 Hz  
POINT 65536  
FREQU 25188.92 Hz  
SCANS 32  
ACQTM 2.6018 sec  
PD 1.5000 sec  
PW1 3.50 usec  
IRNUC 1H  
CTEMP 19.9 c  
SLVNT CDCL3  
EXREF 77.00 ppm  
BF 1.20 Hz  
RGAIN 26

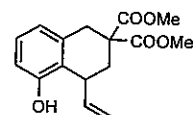

<sup>13</sup>C NMR: 2b

# YKYI-p-EST-3

G:\NMR\12< 2008"N"x\01-N\` •q-pilil~0j\A p-malomite\YI-p-malonnate-3-1H 1.als

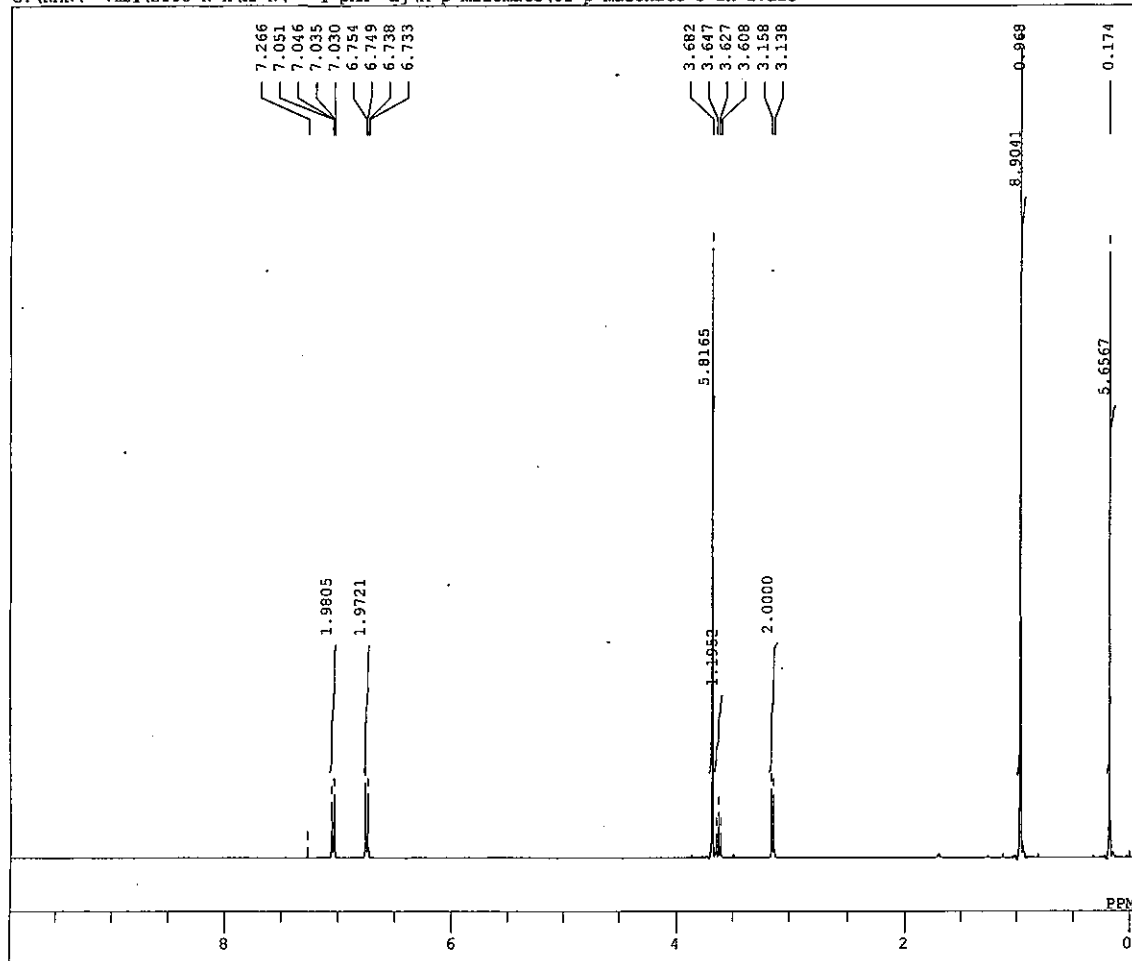

DFILE YI-p-malonnate-3-1H\_1.als  
COMNT YKYI-p-EST-3  
DATIM 15-NOV-2008 17:34:11  
OBNUC 1H  
EXMOD single\_pulse.exp  
OBFRQ 399.00 MHz  
OBSET 784.00 KHz  
OBFIN 597.07 Hz  
POINT 32768  
FREQU 5998.80 Hz  
SCANS 8  
ACQTM 5.4624 sec  
PD 2.0000 sec  
FWI 6.70 usec  
IRNUC 1H  
CTEMP 21.3 c  
SLVNT CDCL3  
EXREF 0.00 ppm  
BF 0.12 Hz  
RGAIN 9

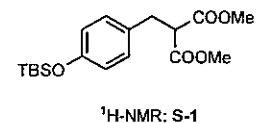

# YKYI-p-EST-3-13C

G:\NMR\12< 2008"N"x\01-N\` •q-pilil~0j\A p-malomite\YI-p-malonnate-3-13C 1.als

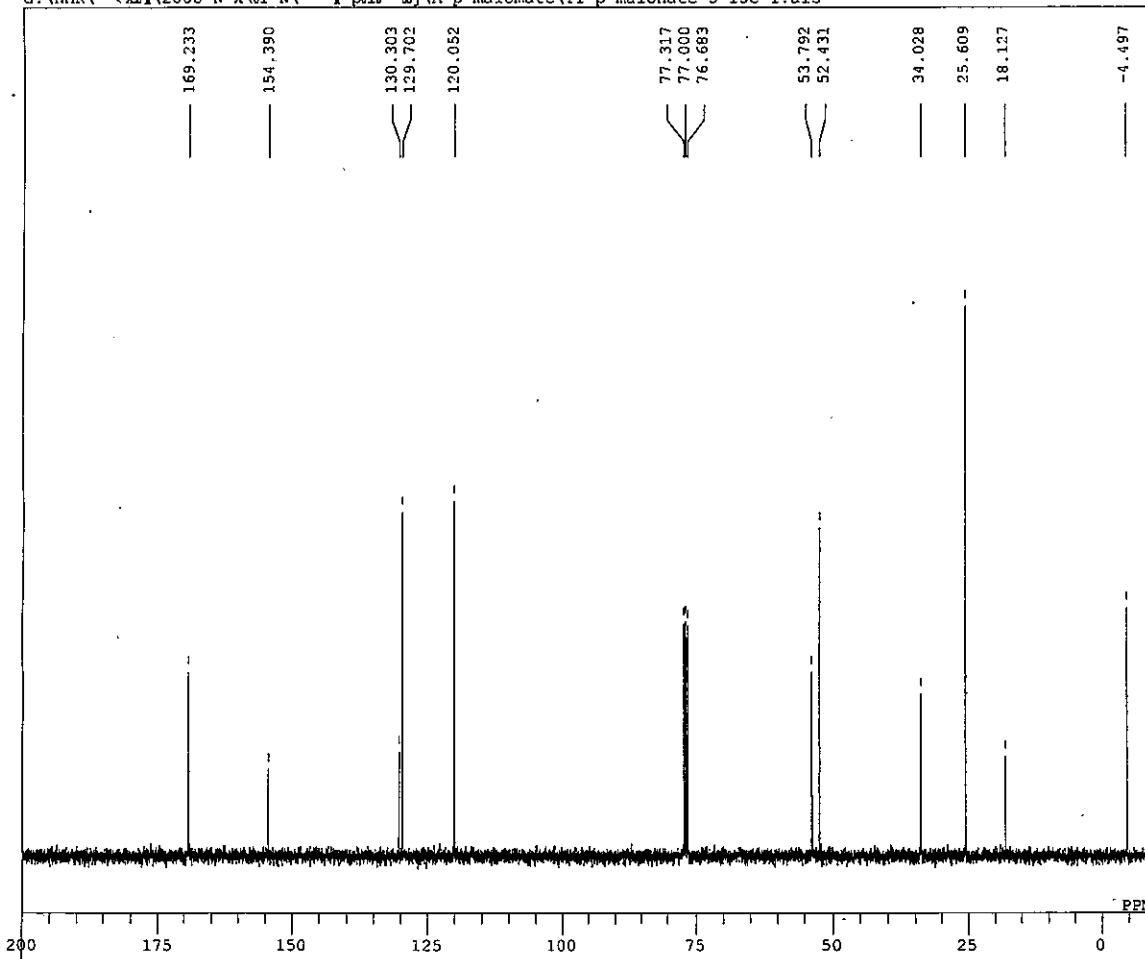

DFILE YI-p-malonnate-3-13C\_1.als  
COMNT YKYI-p-EST-3-13C  
DATIM 15-NOV-2008 17:38:16  
OBNUC 13C  
EXMOD single\_pulse\_dec  
OBFRQ 100.00 MHz  
OBSET 536.00 KHz  
OBFIN 361.11 Hz  
POINT 65536  
FREQU 25188.92 Hz  
SCANS 18  
ACQTM 2.6018 sec  
PD 1.5000 sec  
FWI 3.50 usec  
IRNUC 1H  
CTEMP 22.5 c  
SLVNT CDCL3  
EXREF 77.00 ppm  
BF 1.20 Hz  
RGAIN 26

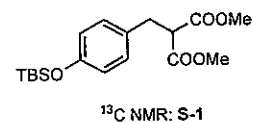

# YKYI-p-mal-2

G:\NMR\12\2008\N\X\01-N\ -p-mal-01\A p-malomite\YI-p-malonate-2-1H 1.als

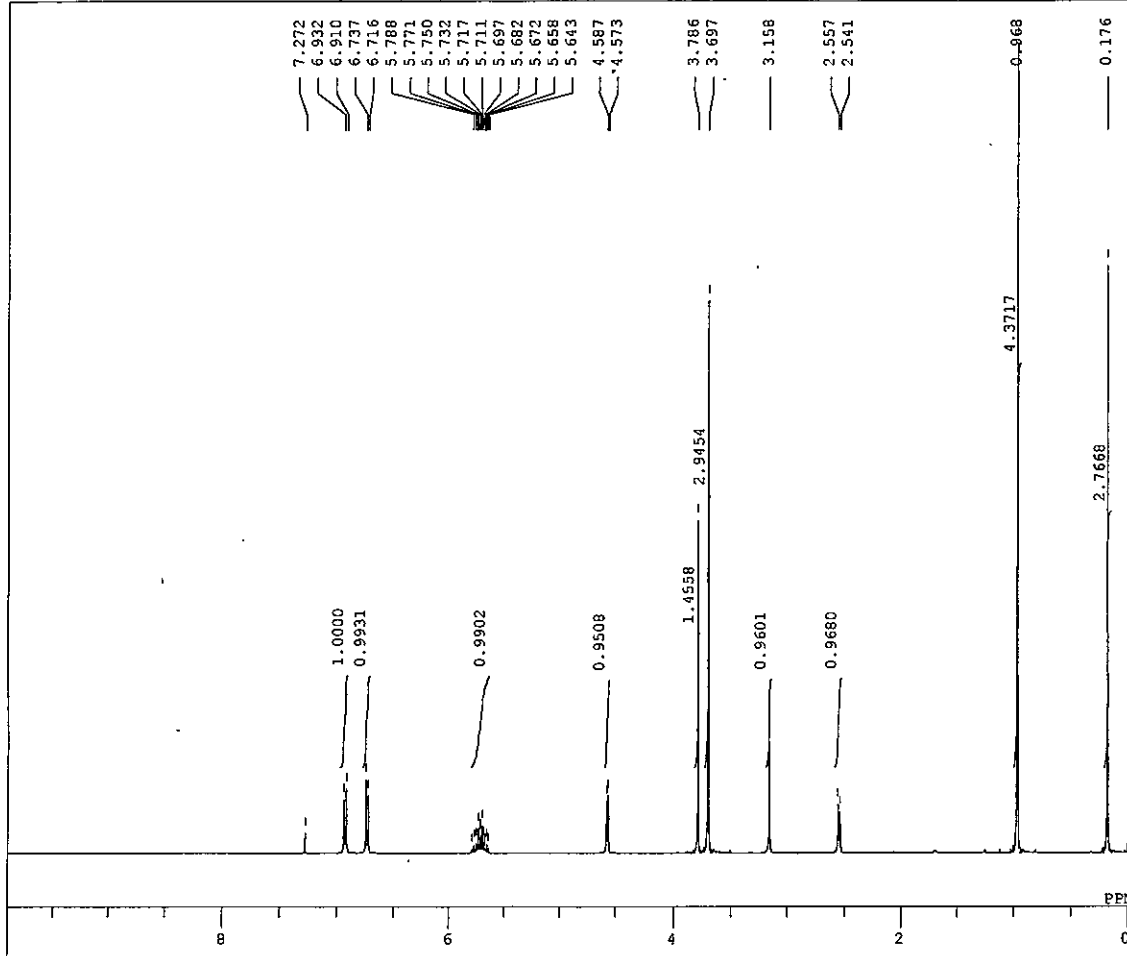

DFILE YI-p-malonate-2-1H\_1.als  
COMNT YKYI-p-mal-2  
DATIM 20-NOV-2008 19:15:38  
OBNUC 1H  
EXMOD single\_pulse.exp  
OBFRQ 399.00 MHz  
OBSET 784.00 KHz  
OBFIN 597.07 Hz  
POINT 32768  
FREQU 5998.80 Hz  
SCANS 8  
ACQTM 5.4624 sec  
PD 2.0000 sec  
PW1 6.70 usec  
IRNUC 1H  
CTEMP 20.9 c  
SLVNT CDCL3  
EXREF 0.00 ppm  
BF 0.12 Hz  
RGAIN 11

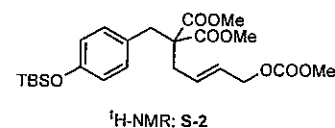

# YKYI-p-mal-2-13C

G:\NMR\12\2008\N\X\01-N\ -p-mal-01\A p-malomite\YI-p-malonate-2-13C 1.als

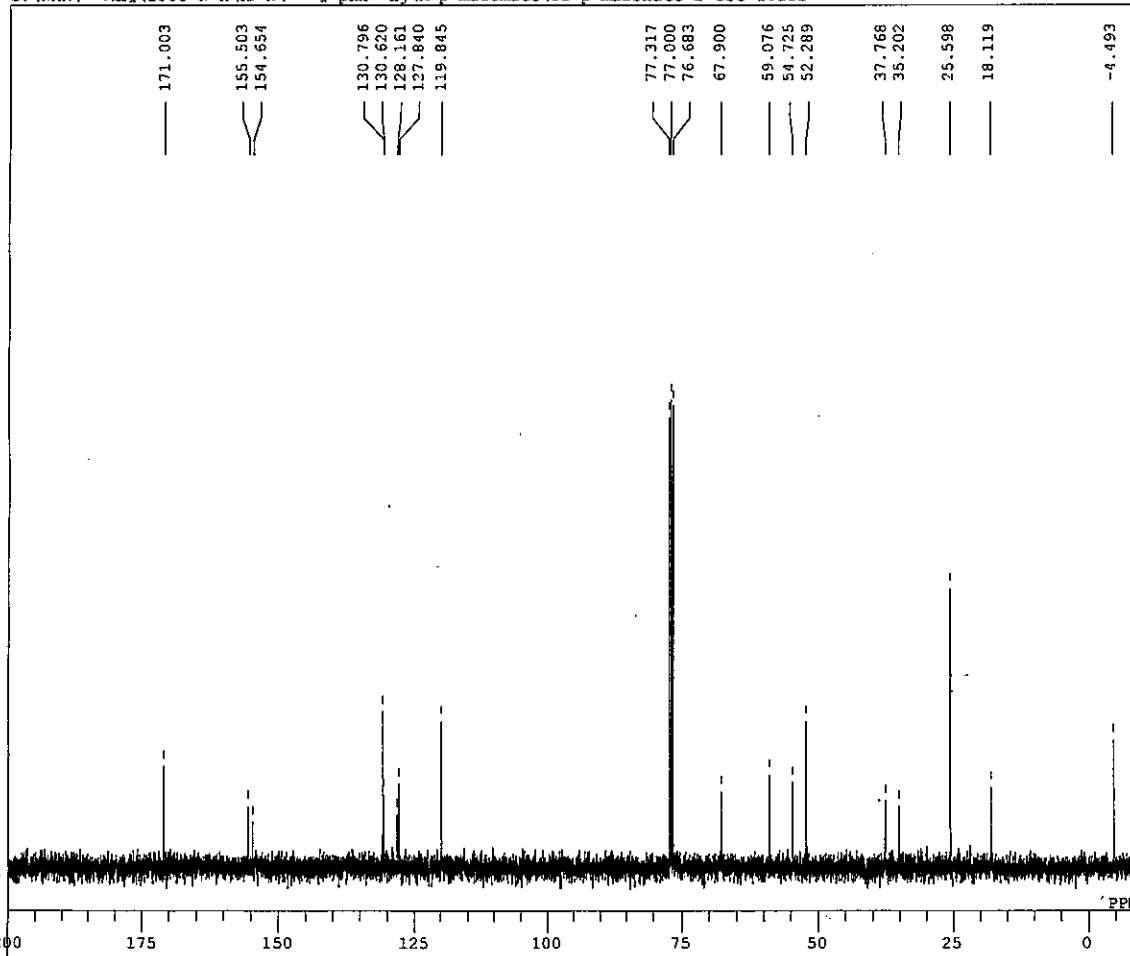

DFILE YI-p-malonate-2-13C\_1.als  
COMNT YKYI-p-mal-2-13C  
DATIM 20-NOV-2008 19:26:21  
OBNUC 13C  
EXMOD single\_pulse\_dec  
OBFRQ 100.00 MHz  
OBSET 536.00 KHz  
OBFIN 361.11 Hz  
POINT 65536  
FREQU 25188.92 Hz  
SCANS 102  
ACQTM 2.6018 sec  
PD 1.5000 sec  
PW1 3.50 usec  
IRNUC 1H  
CTEMP 22.2 c  
SLVNT CDCL3  
EXREF 77.00 ppm  
BF 1.20 Hz  
RGAIN 26

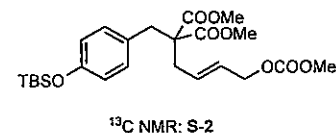



# YKYI-p-EST-1-1H

G:\NMR\12<2008"N"x\11-N\~ \*1-pli11-11j\A p-malomite\VI-p-malonate-1-1H 1.als

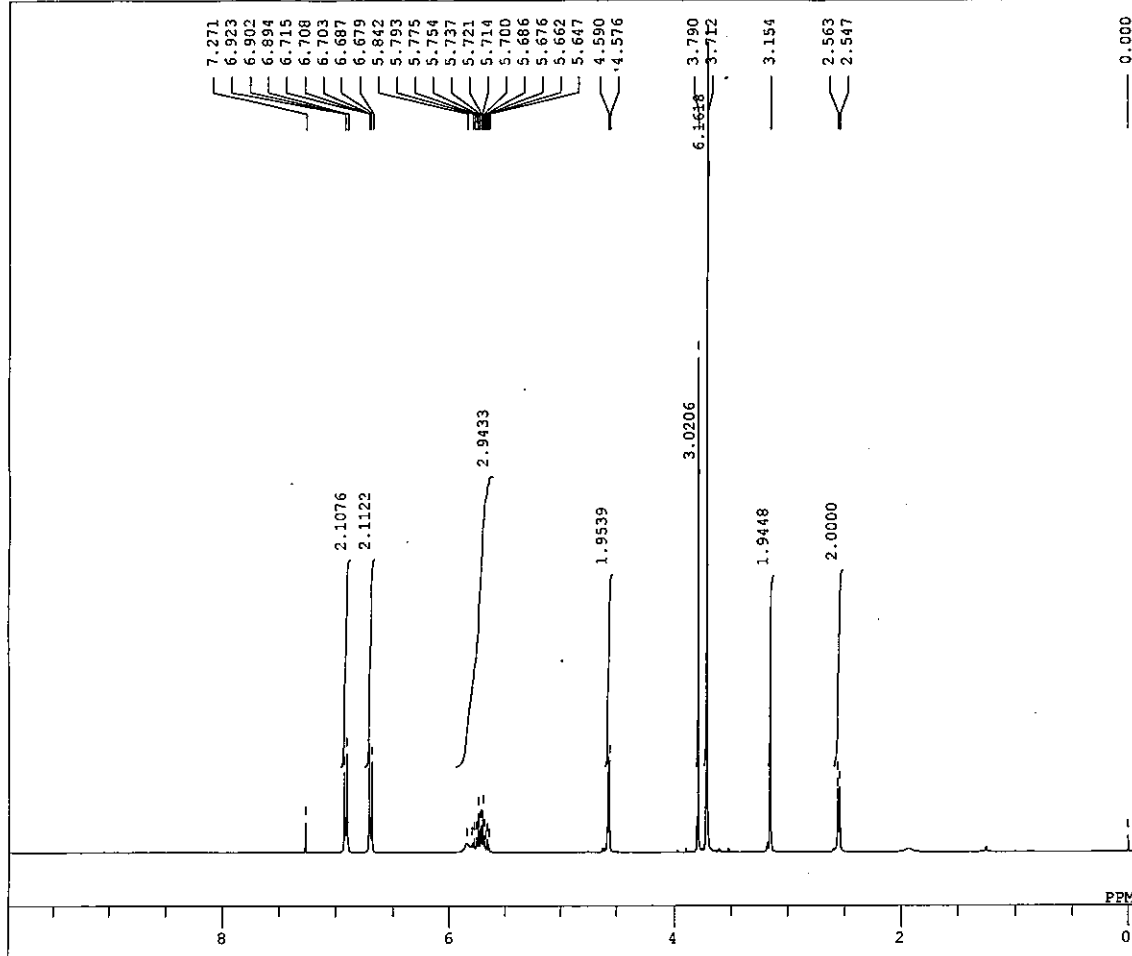

DFILE YI-p-malonate-1-1H\_1.als  
COMNT KYKI-p-EST-1-1H  
DATIM 15-NOV-2008 18:07:17  
OBNUC 1H  
EXMOD single\_pulse.exp  
OBFRQ 399.00 MHz  
OBSET 784.00 KHz  
OBFIN 597.07 Hz  
POINT 32768  
FREQU 5998.80 Hz  
SCANS 8  
ACQTM 5.4624 sec  
PD 2.0000 sec  
PWL 6.70 usec  
IRNUC 1H  
CTEMP 21.6 c  
SLVNT CDCL3  
EXREF 0.00 ppm  
BF 0.12 Hz  
RGAIN 11

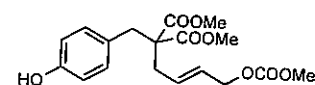

<sup>1</sup>H-NMR: 3a

# YKYI-p-EST-1-13C

G:\NMR\12<2008"N"x\11-N\~ \*1-pli11-11j\A p-malomite\VI-p-malonate-1-13C 1.als

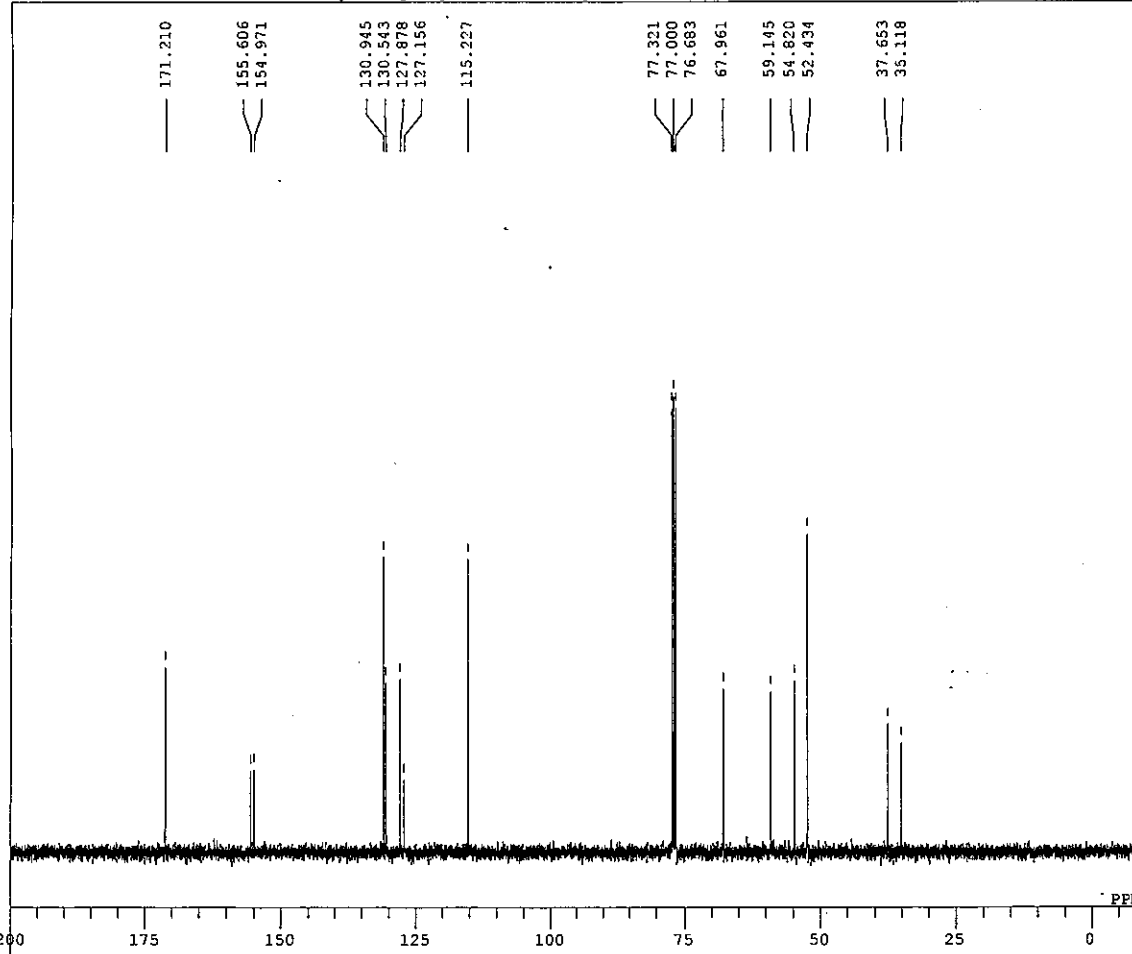

DFILE YI-p-malonate-1-13C\_1.als  
COMNT KYKI-p-EST-1-13C  
DATIM 15-NOV-2008 18:12:52  
OBNUC 13C  
EXMOD single\_pulse\_dec  
OBFRQ 100.00 MHz  
OBSET 536.00 KHz  
OBFIN 361.11 Hz  
POINT 65536  
FREQU 25188.92 Hz  
SCANS 63  
ACQTM 2.6018 sec  
PD 1.5000 sec  
PWL 3.50 usec  
IRNUC 1H  
CTEMP 22.7 c  
SLVNT CDCL3  
EXREF 77.00 ppm  
BF 1.20 Hz  
RGAIN 26

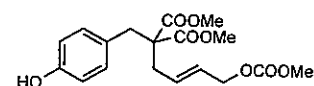

<sup>13</sup>C NMR: 3a

# YKYI-08-630-1H

G:\NMR\12<2008"N"x\I-N\ -T-pil~Uj\G 4-malonate-3-Me\YI-4-malonate-3-Me-3-1H 1.als

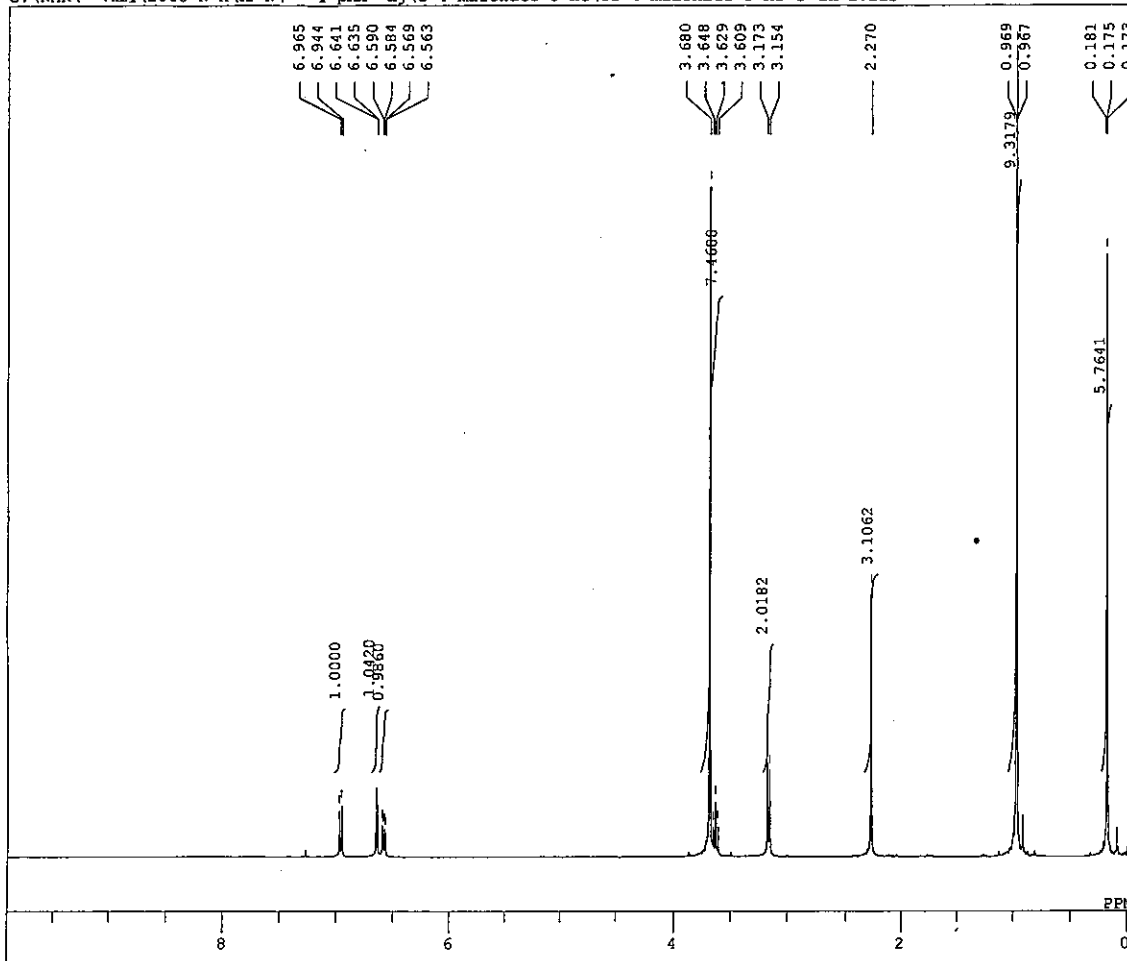

DFILE YI-4-malonate-3-Me-3-1H\_1.a.  
COMNT YKYI-08-630-1H  
DATIM 17-DEC-2008 20:18:44  
OBNUC 1H  
EXMOD single\_pulse.exp  
OBFRQ 399.00 MHz  
OBSET 784.00 KHz  
OBFIN 597.07 Hz  
POINT 32768  
FREQU 5998.80 Hz  
SCANS 8  
ACQTM 5.4624 sec  
PD 2.0000 sec  
FW1 6.70 usec  
IRNUC 1H  
CTEMP 18.5 c  
SLVNT CDCL3  
EXREF 0.00 ppm  
BF 0.12 Hz  
RGAIN 9

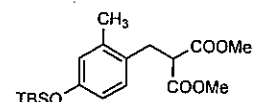

<sup>1</sup>H-NMR: S-3

# YKYI-08-630-13C

G:\NMR\12<2008"N"x\I-N\ -T-pil~Uj\G 4-malonate-3-Me\YI-4-malonate-3-Me-3-13C 1.als

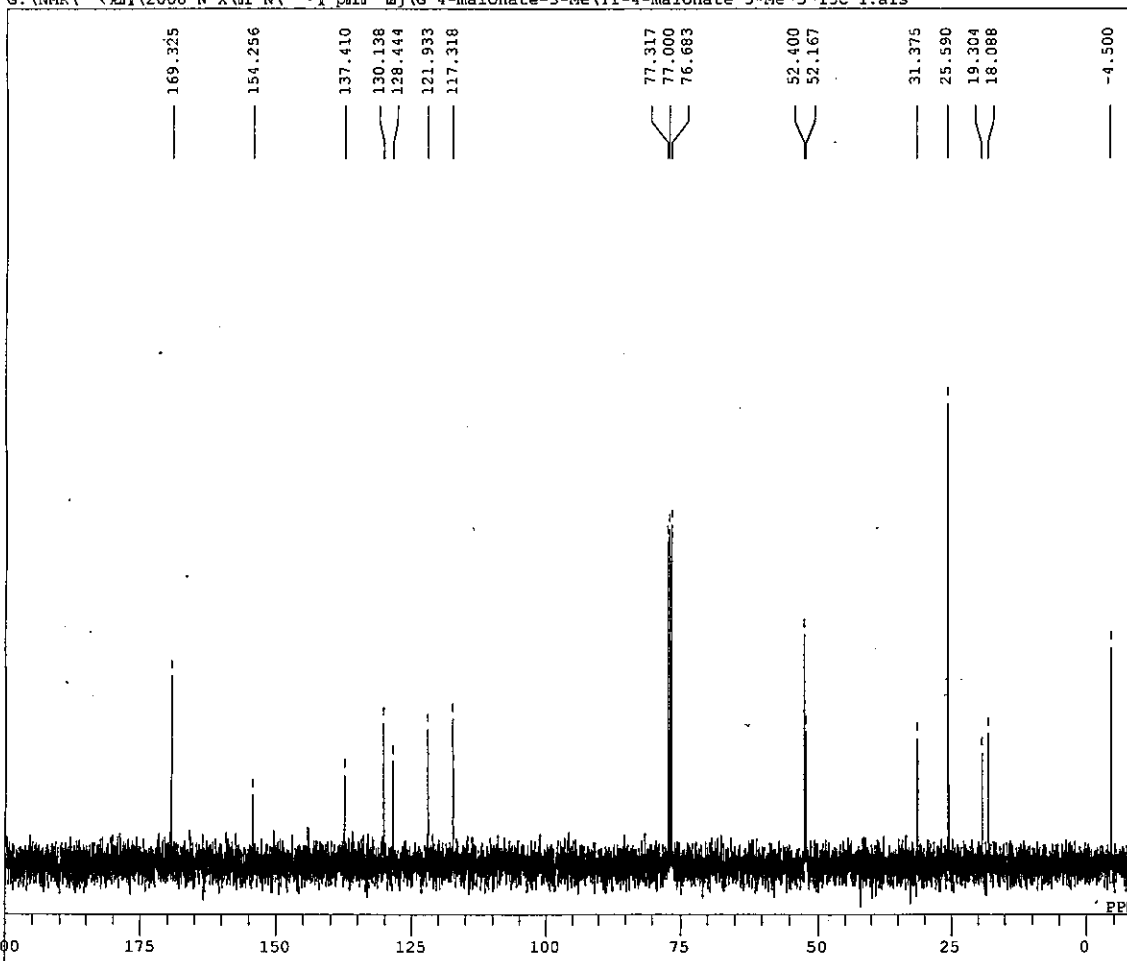

DFILE YI-4-malonate-3-Me-3-13C\_1.  
COMNT YKYI-08-630-13C  
DATIM 17-DEC-2008 20:22:41  
OBNUC 13C  
EXMOD single\_pulse\_dec  
OBFRQ 100.00 MHz  
OBSET 536.00 KHz  
OBFIN 361.11 Hz  
POINT 65536  
FREQU 25188.92 Hz  
SCANS 35  
ACQTM 2.6018 sec  
PD 1.5000 sec  
FW1 3.50 usec  
IRNUC 1H  
CTEMP 19.7 c  
SLVNT CDCL3  
EXREF 77.00 ppm  
BF 1.20 Hz  
RGAIN 26

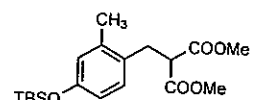

<sup>13</sup>C NMR: S-3

## YKYI-08-632-1H

G:\NMR\12&lt; 2008\N\X\01-N\ -f-plif-0j\G 4-malonate-3-Me\YI-4-malonate-3-Me-2-1H 1.als

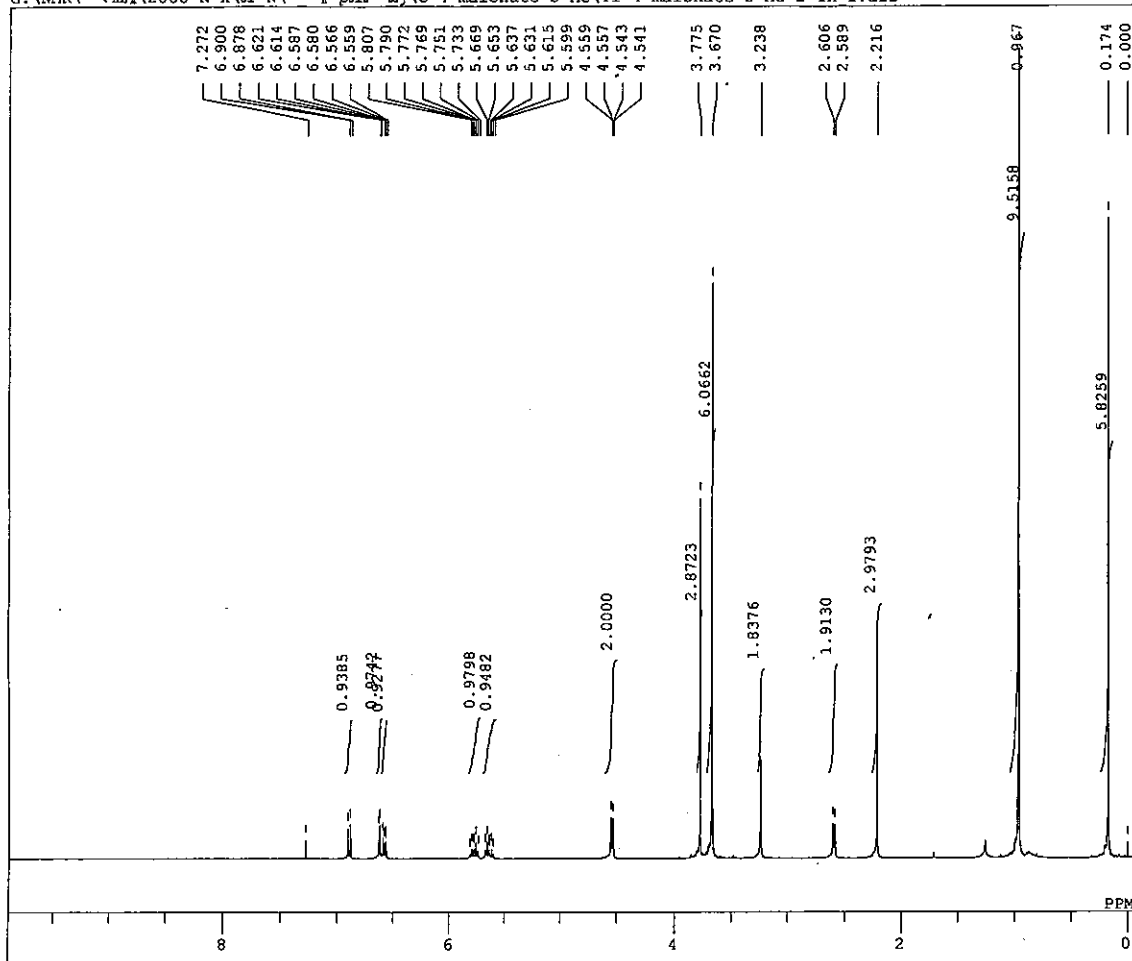

DFILE YI-4-malonate-3-Me-2-1H\_1.als  
 COMNT YKYI-08-632-1H  
 DATIM 18-DEC-2008 17:52:56  
 OBNUC 1H  
 EXMOD single pulse.exp  
 OBFRQ 399.00 MHz  
 OBSET 784.00 KHz  
 OBFIN 597.07 Hz  
 POINT 32768  
 FREQU 5998.80 Hz  
 SCANS 8  
 ACQTM 5.4624 sec  
 PD 2.0000 sec  
 PW1 6.70 usec  
 IRNUC 1H  
 CTEMP 18.3 c  
 SLVNT CDCL3  
 EXREF 0.00 ppm  
 BF 0.12 Hz  
 RGAIN 10

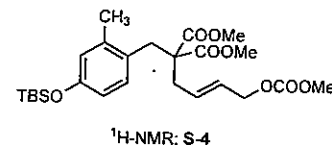

## YKYI-08-632-13C

G:\NMR\12&lt; 2008\N\X\01-N\ -f-plif-0j\G 4-malonate-3-Me\YI-4-malonate-3-Me-2-13C 1.als

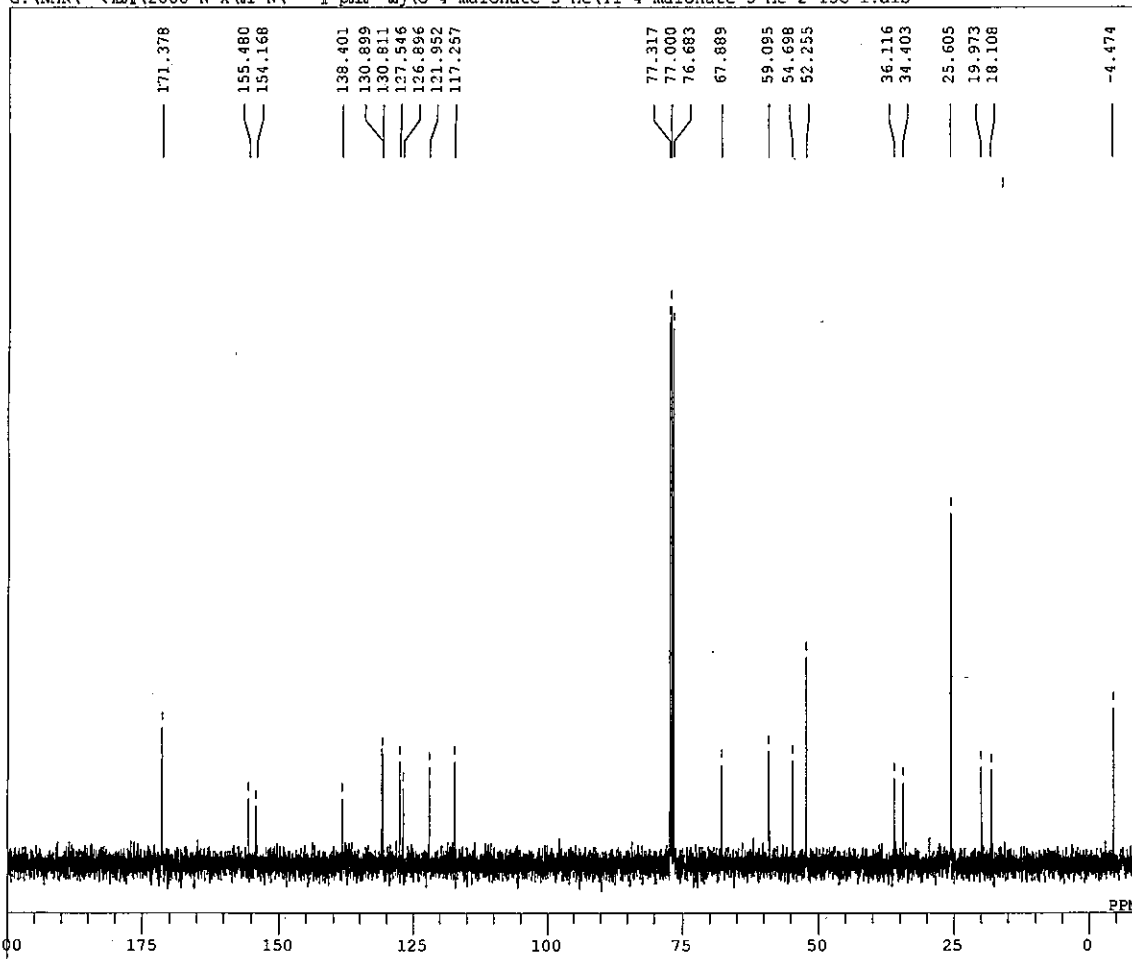

DFILE YI-4-malonate-3-Me-2-13C\_1.als  
 COMNT YKYI-08-632-13C  
 DATIM 18-DEC-2008 18:02:22  
 OBNUC 13C  
 EXMOD single pulse dec  
 OBFRQ 100.00 MHz  
 OBSET 536.00 KHz  
 OBFIN 361.11 Hz  
 POINT 65536  
 FREQU 25188.92 Hz  
 SCANS 102  
 ACQTM 2.6018 sec  
 PD 1.5000 sec  
 PW1 3.50 usec  
 IRNUC 1H  
 CTEMP 19.5 c  
 SLVNT CDCL3  
 EXREF 77.00 ppm  
 BF 1.20 Hz  
 RGAIN 26

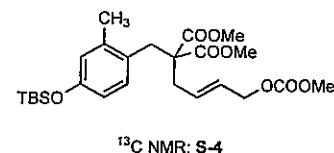

## YKYI-08-634-1H

G:\NMR\12&lt;2008\N\X\I\N\` \*g-p0i0-0j\G 4-malonate-3-Me\YI-4-malonate-3-Me-1-1H 1.als

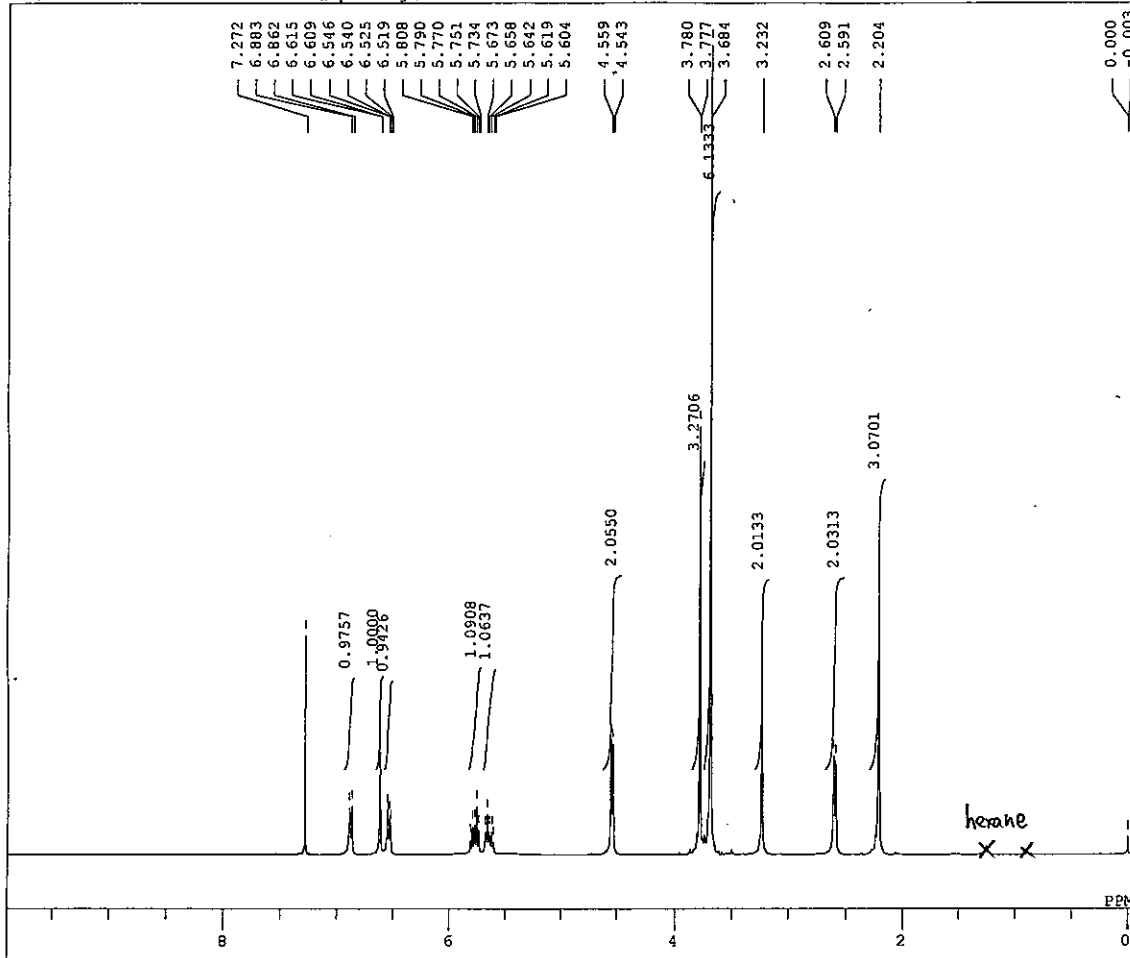

DFILE YI-4-malonate-3-Me-1-1H\_1.a.  
 COMNT YKYI-08-634-1H  
 DATIM 18-DEC-2008 18:05:41  
 OBNUC 1H  
 EXMOD single pulse.exp  
 OBFRQ 399.00 MHz  
 OBSET 784.00 KHz  
 OBFIN 597.07 Hz  
 POINT 32768  
 FREQU 5998.80 Hz  
 SCANS 8  
 ACQTM 5.4624 sec  
 PD 2.0000 sec  
 PW1 6.70 usec  
 IRNUC 1H  
 CTEMP 18.6 c  
 SLVNT CDCL3  
 EXREF 0.00 ppm  
 BF 0.12 Hz  
 RGAIN 13

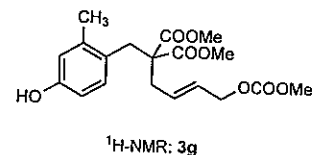

## YKYI-08-634-13C

G:\NMR\12&lt;2008\N\X\I\N\` \*g-p0i0-0j\G 4-malonate-3-Me\YI-4-malonate-3-Me-1-13C 1.als

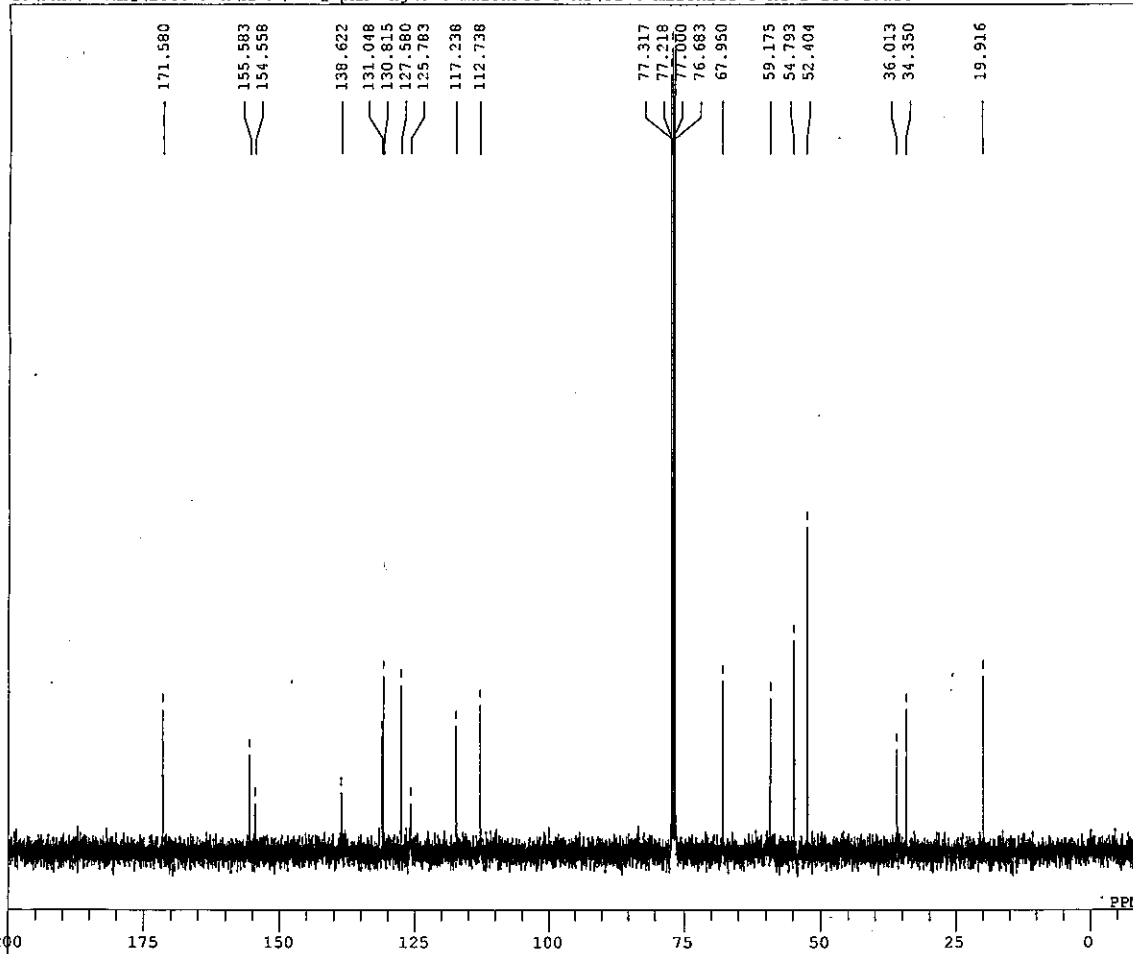

DFILE YI-4-malonate-3-Me-1-13C\_1.a.  
 COMNT YKYI-08-634-13C  
 DATIM 18-DEC-2008 18:25:13  
 OBNUC 13C  
 EXMOD single pulse dec  
 OBFRQ 100.00 MHz  
 OBSET 536.00 KHz  
 OBFIN 361.11 Hz  
 POINT 65536  
 FREQU 25188.92 Hz  
 SCANS 268  
 ACQTM 2.6018 sec  
 PD 1.5000 sec  
 PW1 3.50 usec  
 IRNUC 1H  
 CTEMP 19.6 c  
 SLVNT CDCL3  
 EXREF 77.00 ppm  
 BF 1.20 Hz  
 RGAIN 26

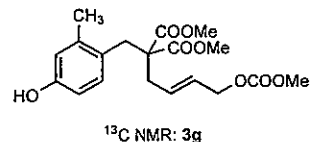

## YK-TN-26-21-1H

G:\NMR\nemoto\DATA-IPSO-FC\YK-TN-26-21-1H 1.als

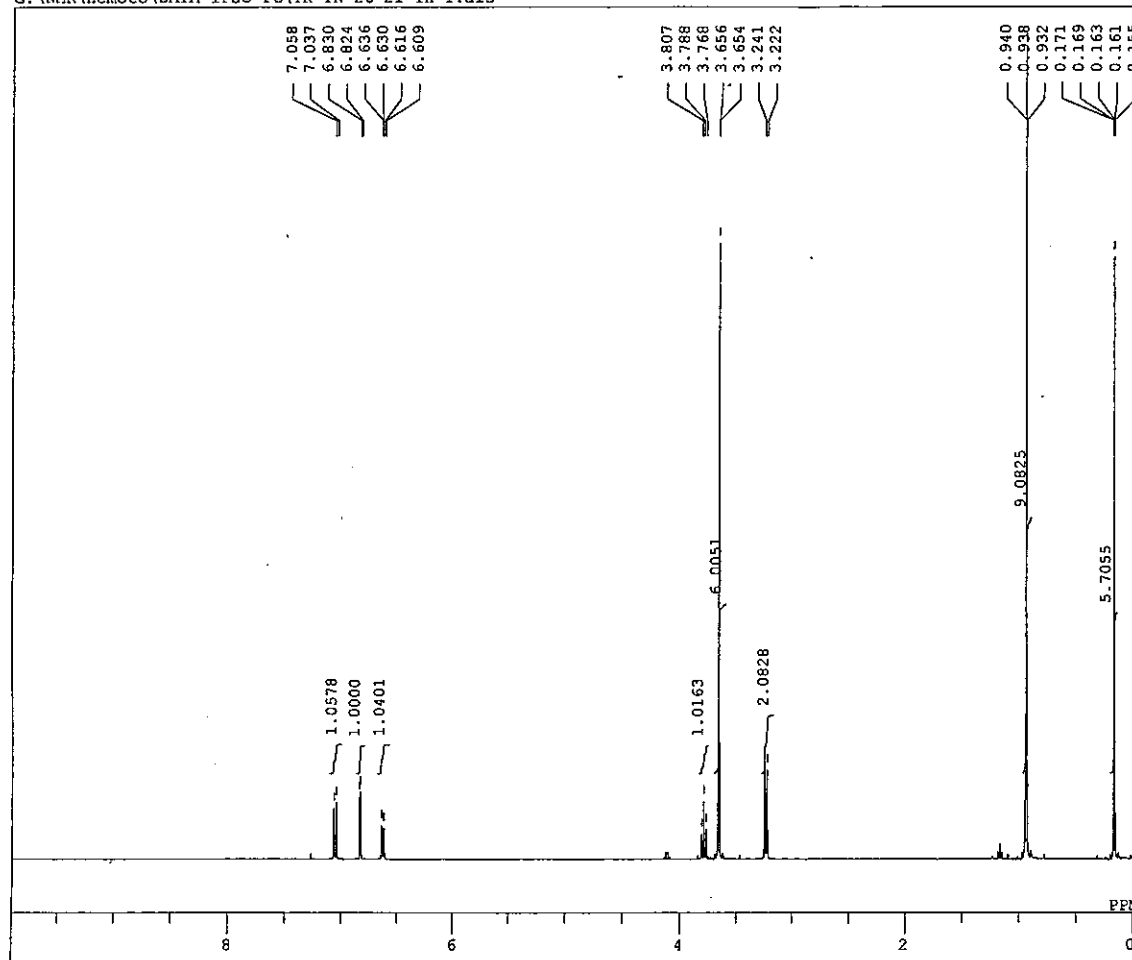

DFILE YK-TN-26-21-1H 1.als  
 COMNT YK-TN-26-21-1H  
 DATIM 16-APR-2010 05:11:25  
 OBNUC 1H  
 EXMOD single\_pulse.exp  
 OBFRQ 399.00 MHz  
 OBSET 784.00 KHz  
 OBFIN 597.07 Hz  
 POINT 32768  
 FREQU 5998.80 Hz  
 SCANS 4  
 ACQTM 5.4624 sec  
 PD 2.0000 sec  
 PW1 6.85 usec  
 IRNUC 1H  
 CTEMP 20.7 c  
 SLVNT CDCL3  
 EXREF 7.26 ppm  
 BF 0.12 Hz  
 RGAIN 5

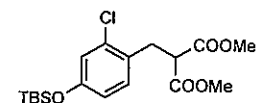<sup>1</sup>H-NMR: S-5

## YK-TN-26-21-13C2

G:\NMR\nemoto\DATA-IPSO-FC\YK-TN-26-21-13C2 1.als

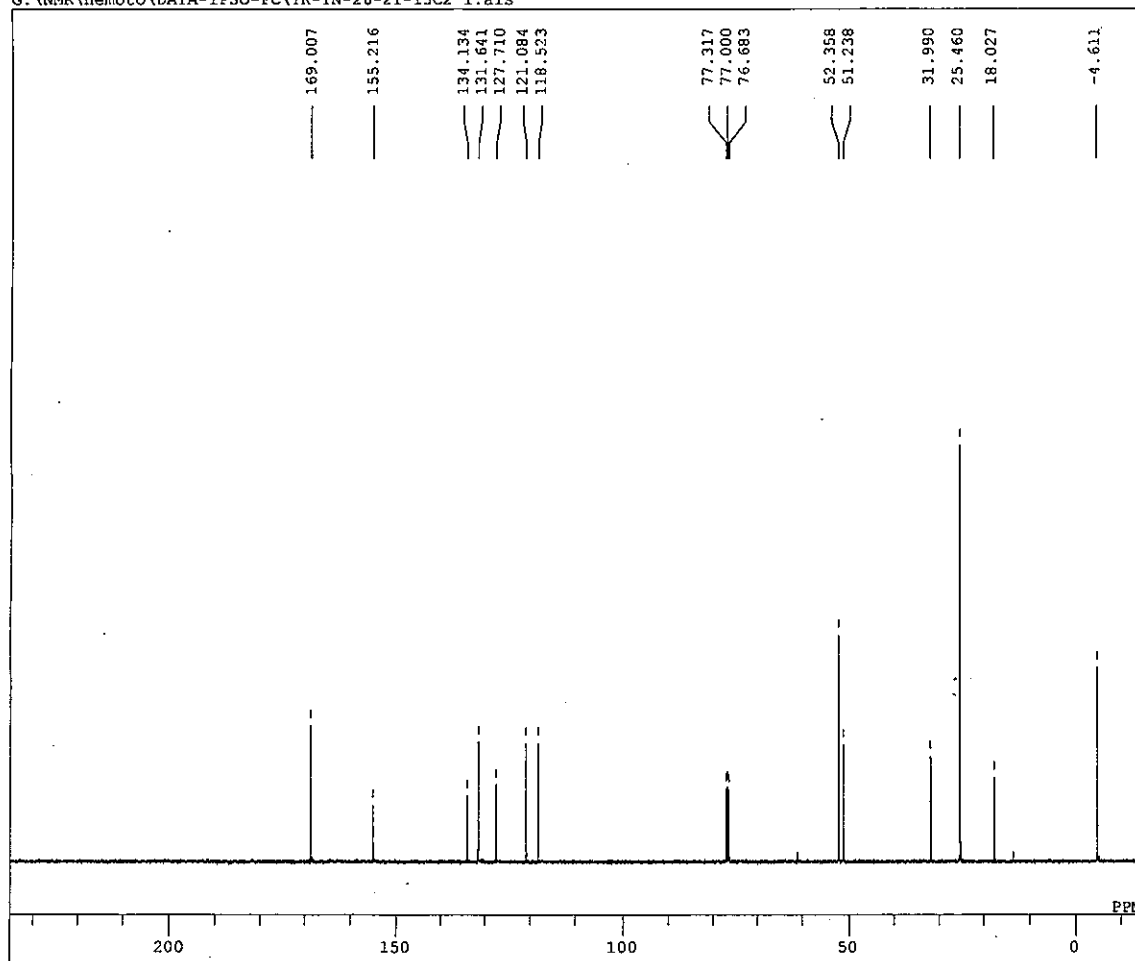

DFILE YK-TN-26-21-13C2\_1.als  
 COMNT YK-TN-26-21-13C2  
 DATIM 16-APR-2010 05:09:39  
 OBNUC 13C  
 EXMOD single\_pulse\_dec  
 OBFRQ 100.00 MHz  
 OBSET 536.00 KHz  
 OBFIN 361.11 Hz  
 POINT 65536  
 FREQU 25188.92 Hz  
 SCANS 32  
 ACQTM 2.6018 sec  
 PD 1.5000 sec  
 PW1 3.50 usec  
 IRNUC 1H  
 CTEMP 21.4 c  
 SLVNT CDCL3  
 EXREF 77.00 ppm  
 BF 1.20 Hz  
 RGAIN 23

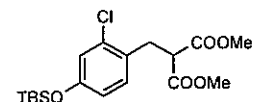<sup>13</sup>C NMR: S-5

## YK-TN-26-23-1H

G:\NMR\nemoto\DATA-IPSO-FC\YK-TN-26-23-1H 1.als

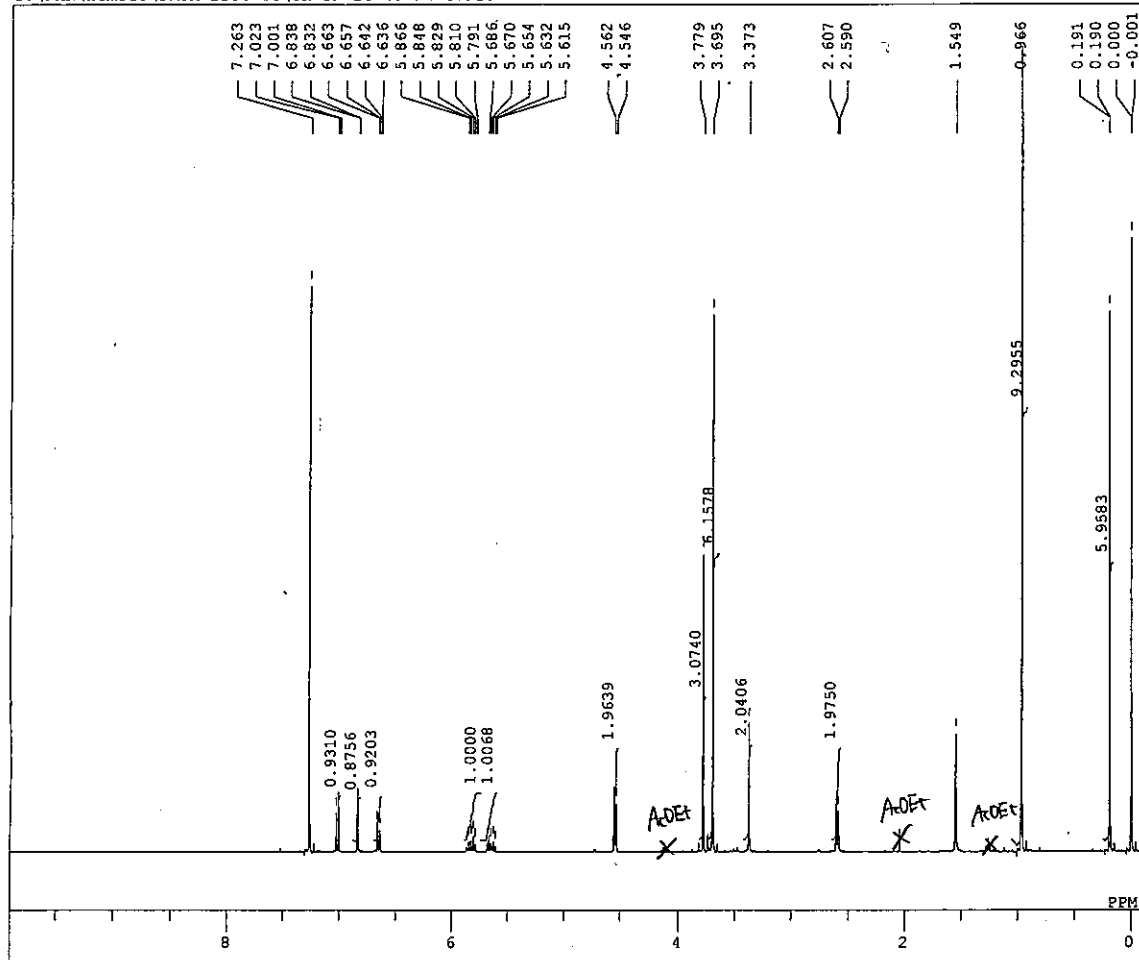

DFILE YK-TN-26-23-1H 1.als  
 COMNT YK-TN-26-23-1H  
 DATIM 18-APR-2010 00:35:53  
 OBNUC 1H  
 EXMOD single\_pulse.exp  
 OBFRQ 399.00 MHz  
 OBSET 784.00 KHz  
 OBFIN 597.07 Hz  
 POINT 32768  
 FREQU 5998.80 Hz  
 SCANS 16  
 ACQTM 5.4624 sec  
 PD 2.0000 sec  
 PW1 6.85 usec  
 IRNUC 1H  
 CTEMP 21.1 c  
 SLVNT CDCL3  
 EXREF 0.00 ppm  
 BF 0.12 Hz  
 RGAIN 20

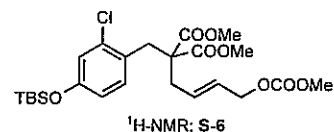

## YK-TN-26-23-13C

G:\NMR\nemoto\DATA-IPSO-FC\YK-TN-26-23-13C 1.als

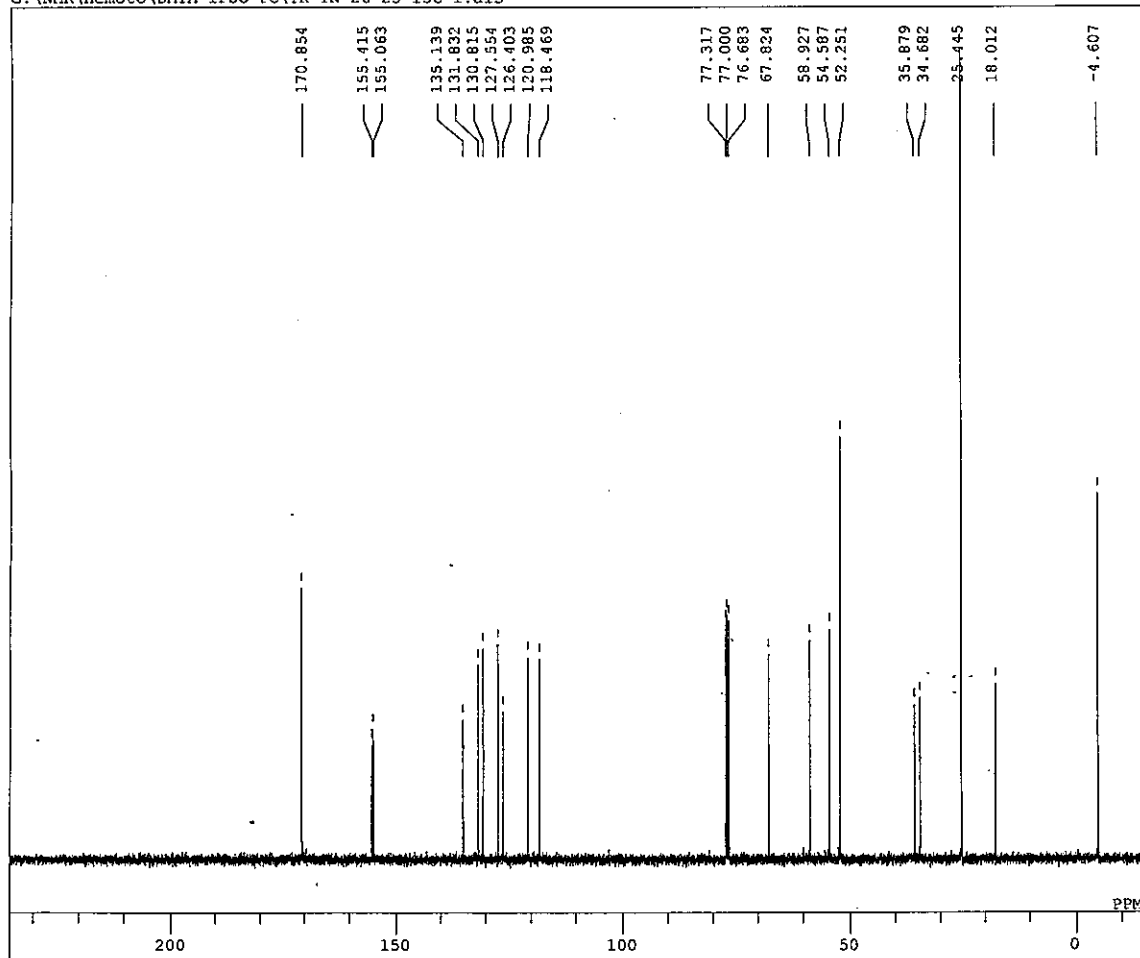

DFILE YK-TN-26-23-13C 1.als  
 COMNT YK-TN-26-23-13C  
 DATIM 18-APR-2010 00:43:22  
 OBNUC 13C  
 EXMOD single\_pulse\_dec  
 OBFRQ 100.00 MHz  
 OBSET 536.00 KHz  
 OBFIN 361.11 Hz  
 POINT 65536  
 FREQU 25188.92 Hz  
 SCANS 37  
 ACQTM 2.6018 sec  
 PD 1.5000 sec  
 PW1 3.50 usec  
 IRNUC 1H  
 CTEMP 22.2 c  
 SLVNT CDCL3  
 EXREF 77.00 ppm  
 BF 1.20 Hz  
 RGAIN 24

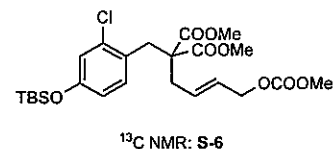

## YK-TN-26-27-1H

G:\NMR\nemoto\DATA-IPSO-FC\YK-TN-26-27-1H 1.als

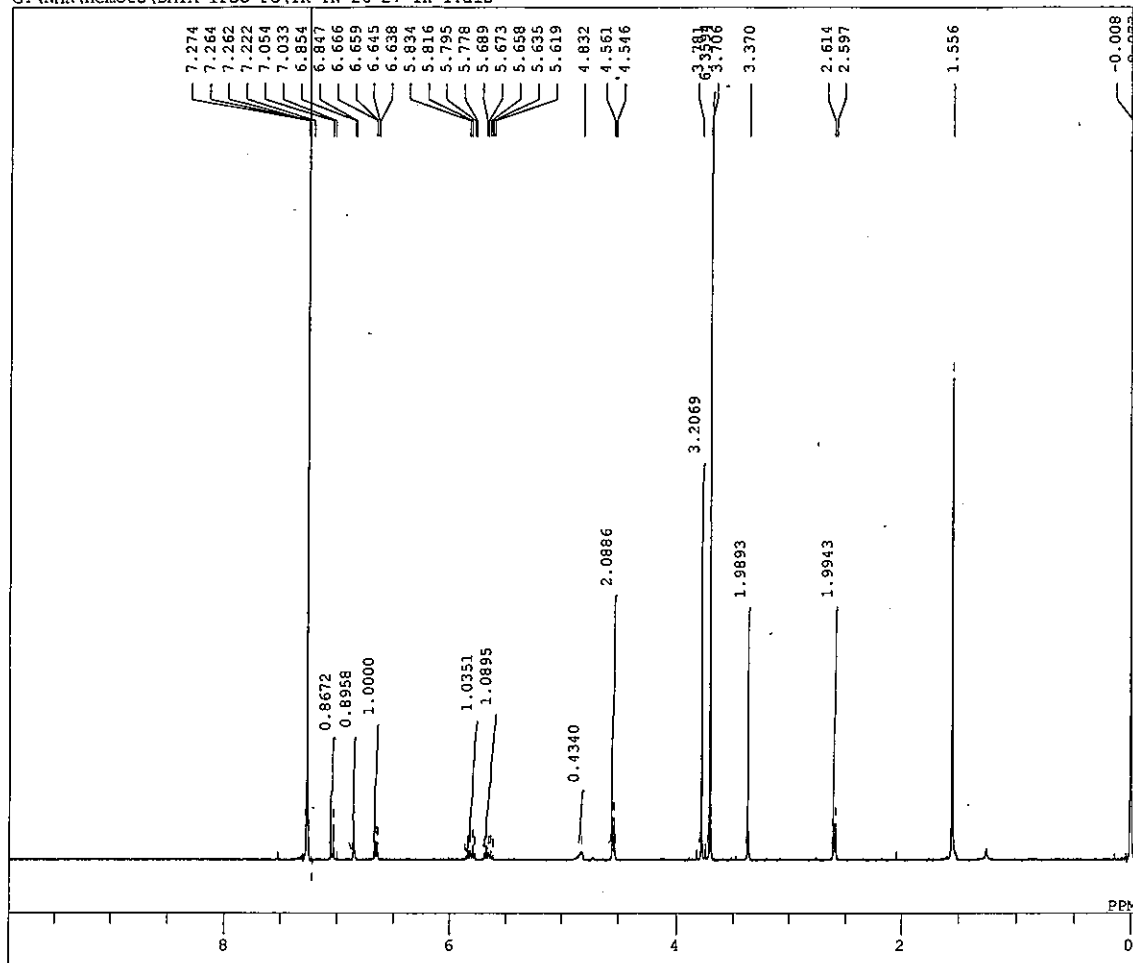

DFILE YK-TN-26-27-1H 1.als  
 COMNT YK-TN-26-27-1H  
 DATIM 21-APR-2010 19:14:51  
 OBNUC 1H  
 EXMOD single\_pulse.exp  
 OBFRQ 399.00 MHz  
 OBSET 784.00 KHz  
 OBFIN 597.07 Hz  
 POINT 32768  
 FREQU 5998.80 Hz  
 SCANS 16  
 ACQTM 5.4624 sec  
 PD 2.0000 sec  
 PW1 6.85 usec  
 IRNUC 1H  
 CTEMP 21.0 c  
 SLVNT CDCL3  
 EXREF 0.00 ppm  
 BF 0.12 Hz  
 RGAIN 22

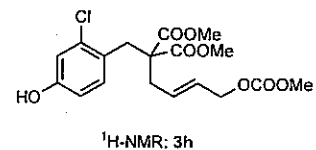

## YK-TN-26-27-13C2

G:\NMR\nemoto\DATA-IPSO-FC\YK-TN-26-27-13C2 1.als

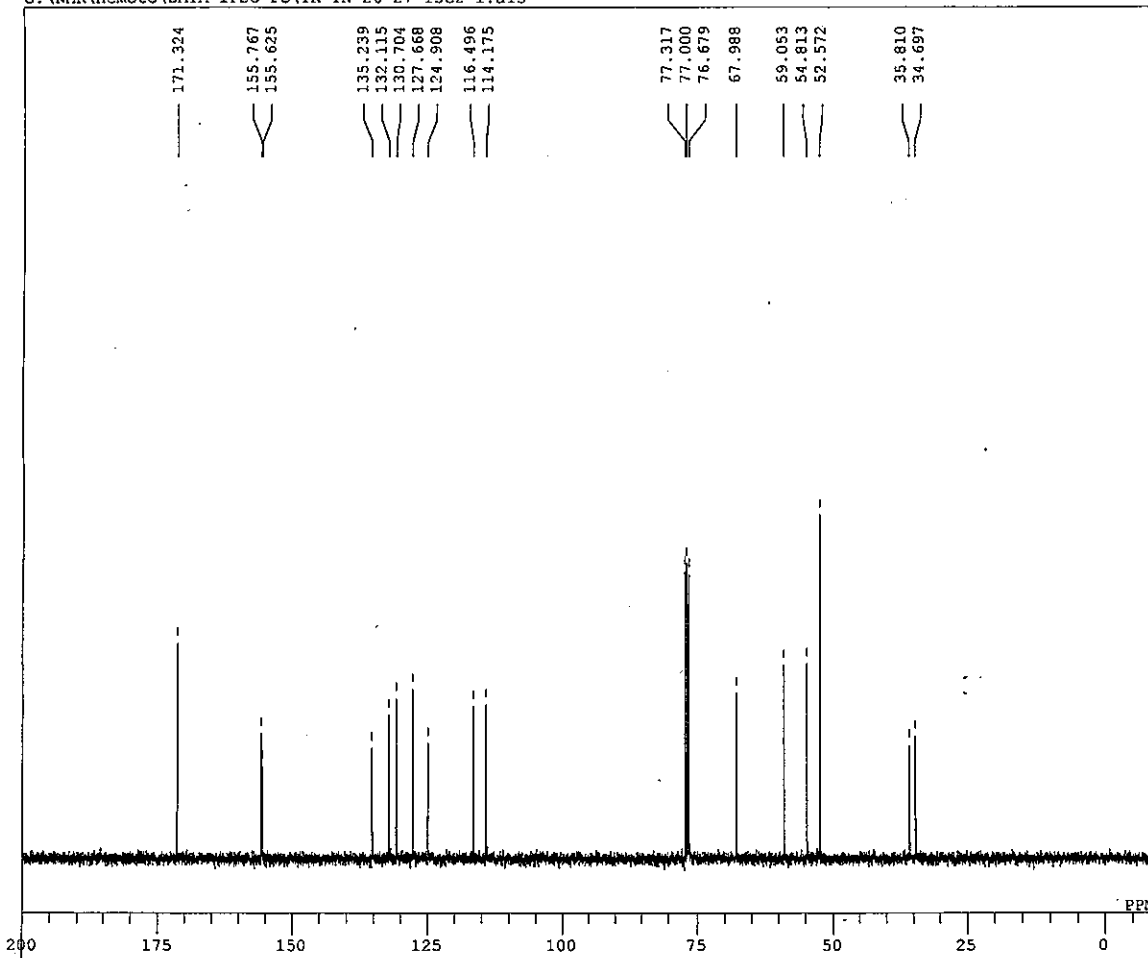

DFILE YK-TN-26-27-13C2 1.als  
 COMNT YK-TN-26-27-13C2  
 DATIM 21-APR-2010 19:09:14  
 OBNUC 13C  
 EXMOD single\_pulse\_dec  
 OBFRQ 100.00 MHz  
 OBSET 536.00 KHz  
 OBFIN 361.11 Hz  
 POINT 65536  
 FREQU 25188.92 Hz  
 SCANS 45  
 ACQTM 2.6018 sec  
 PD 1.5000 sec  
 PW1 3.50 usec  
 IRNUC 1H  
 CTEMP 22.2 c  
 SLVNT CDCL3  
 EXREF 77.00 ppm  
 BF 1.20 Hz  
 RGAIN 24

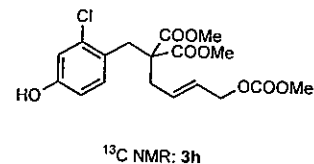

G:\NMR\cgc\spiro data\YKMY-09-363-PRODUCT-1H 1.als

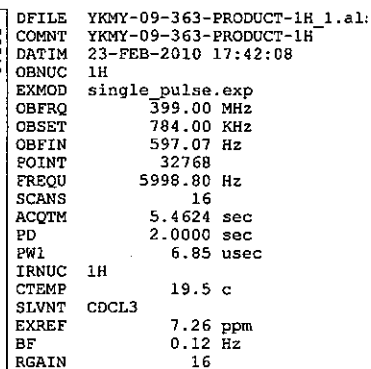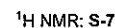

G:\NMR\cgc\spiro data\YKMY-09-363-PRODUCT-13C 1.als

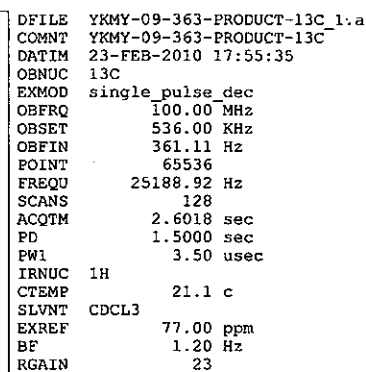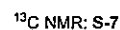



# YKMY-09-364-PRODUCT-1H

G:\NMR\g" c\spiro data\YKMY-09-364-PRODUCT-1H 1.als

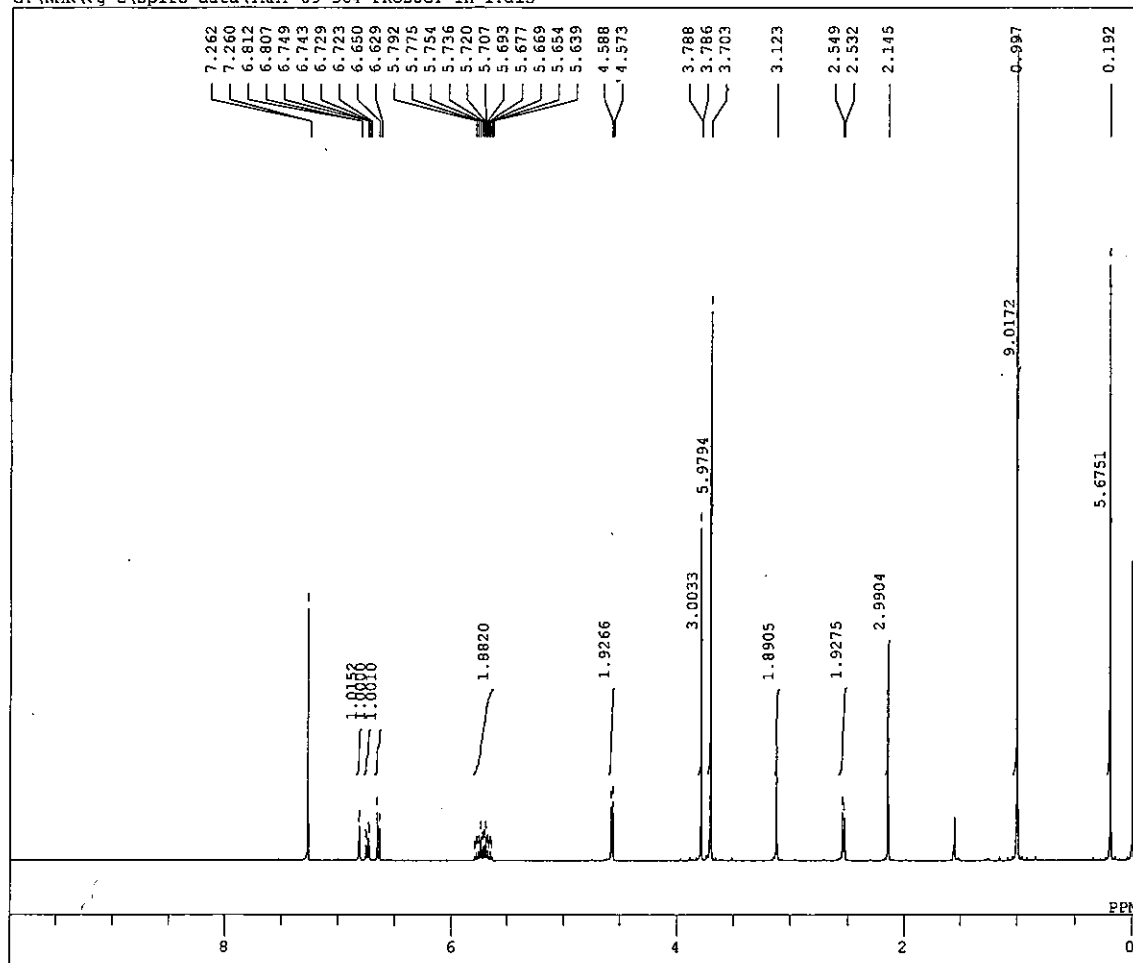

DFILE YKMY-09-364-PRODUCT-1H 1.als  
COMNT YKMY-09-364-PRODUCT-1H  
DATIM 23-FEB-2010 18:01:56  
OBNUC 1H  
EXMOD single pulse.exp  
OBFRQ 399.00 MHz  
OBSET 784.00 KHz  
OBFIN 597.07 Hz  
POINT 32768  
FREQU 5998.80 Hz  
SCANS 16  
ACQTM 5.4624 sec  
PD 2.0000 sec  
PW1 6.85 usec  
IRNUC 1H  
CTEMP 20.0 c  
SLVNT CDCL3  
EXREF 7.26 ppm  
BF 0.12 Hz  
RGAIN 17

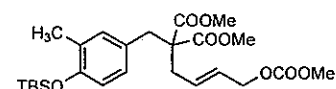

<sup>1</sup>H NMR: S-8

# YKMY-09-364-PRODUCT-13C

G:\NMR\g" c\spiro data\YKMY-09-364-PRODUCT-13C 1.als

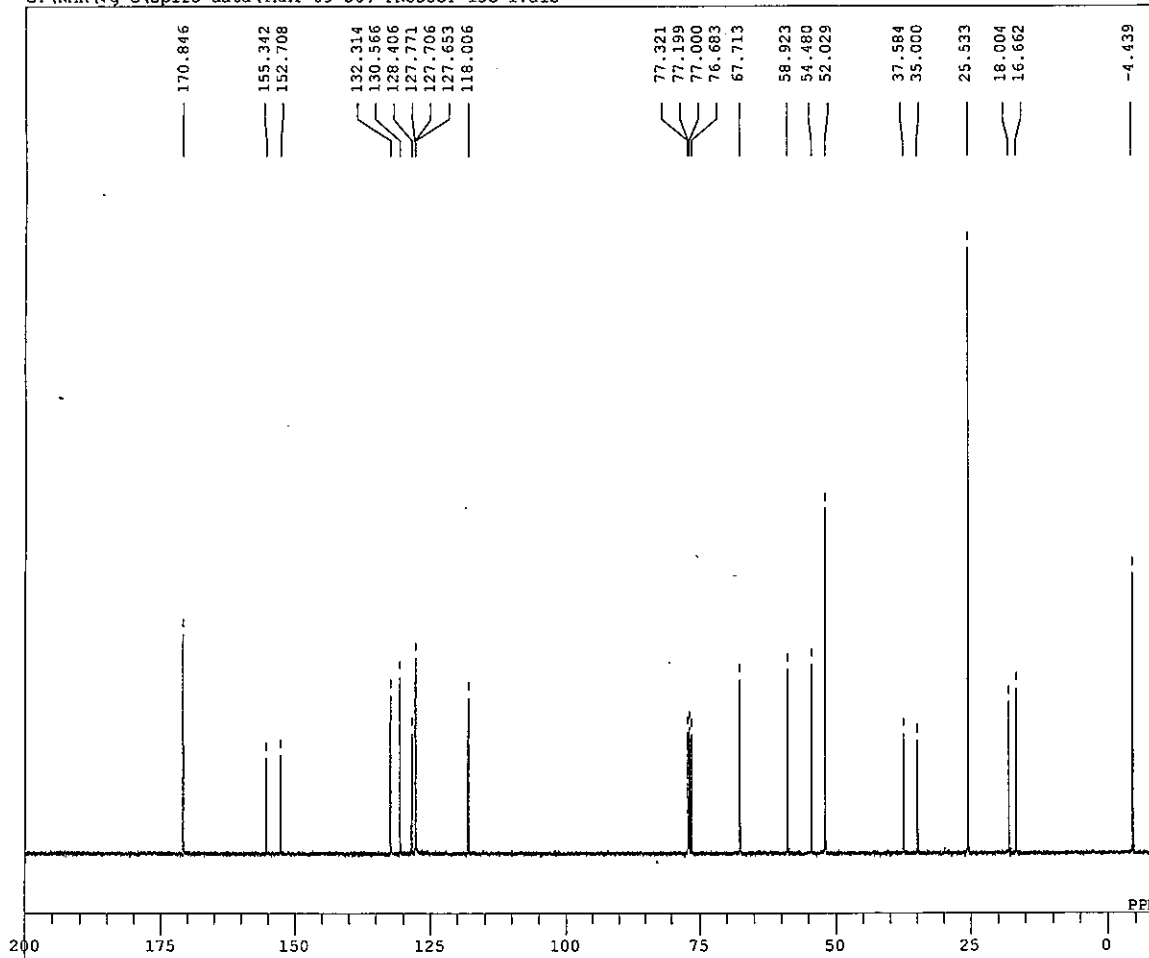

DFILE YKMY-09-364-PRODUCT-13C 1.a.  
COMNT YKMY-09-364-PRODUCT-13C  
DATIM 23-FEB-2010 18:09:53  
OBNUC 13C  
EXMOD single pulse dec  
OBFRQ 100.00 MHz  
OBSET 536.00 KHz  
OBFIN 361.11 Hz  
POINT 65536  
FREQU 25188.92 Hz  
SCANS 53  
ACQTM 2.6018 sec  
PD 1.5000 sec  
PW1 3.50 usec  
IRNUC 1H  
CTEMP 21.1 c  
SLVNT CDCL3  
EXREF 77.00 ppm  
BF 1.20 Hz  
RGAIN 23

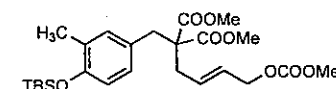

<sup>13</sup>C NMR: S-8

# YKMY-10-368-PRODUCT-1H

G:\NMR\c\g"spiro data\YKMY-10-368-PRODUCT-1H 1.als

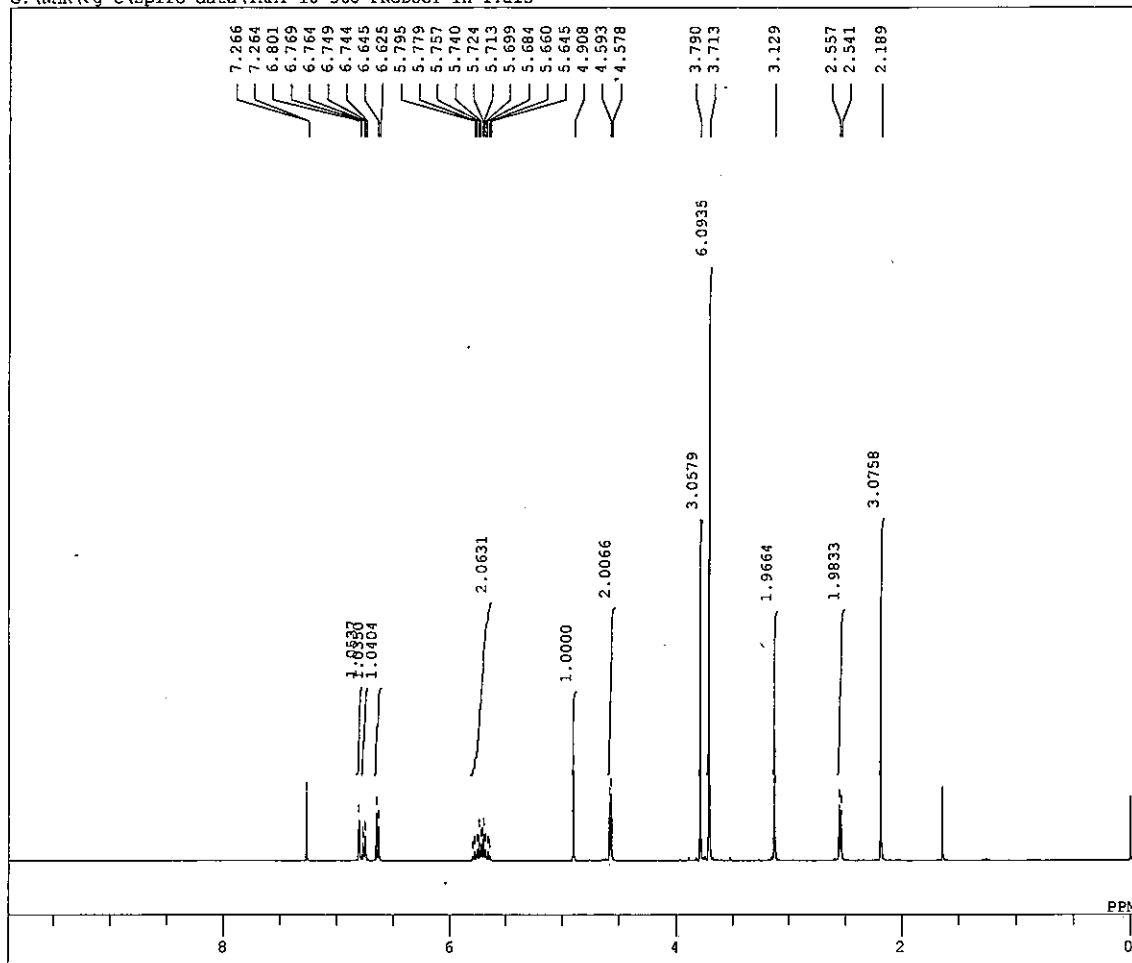

DFILE YKMY-10-368-PRODUCT-1H 1.als  
COMNT YKMY-10-368-PRODUCT-1H  
DATIM 27-FEB-2010 05:10:43  
OBNUC 1H  
EXMOD single\_pulse.exp  
OBFREQ 399.00 MHz  
OBSET 784.00 KHz  
OBFIN 597.07 Hz  
POINT 32768  
FREQU 5998.80 Hz  
SCANS 16  
ACQTM 5.4624 sec  
PD 2.0000 sec  
FWL 6.85 usec  
IRNUC 1H  
CTEMP 21.3 c  
SLVNT CDCL3  
EXREF 0.00 ppm  
BF 0.12 Hz  
RGAIN 13

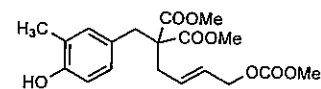

<sup>1</sup>H NMR: 3k

# YKMY-10-368-PRODUCT-13C

G:\NMR\c\g"spiro data\YKMY-10-368-PRODUCT-13C 1.als

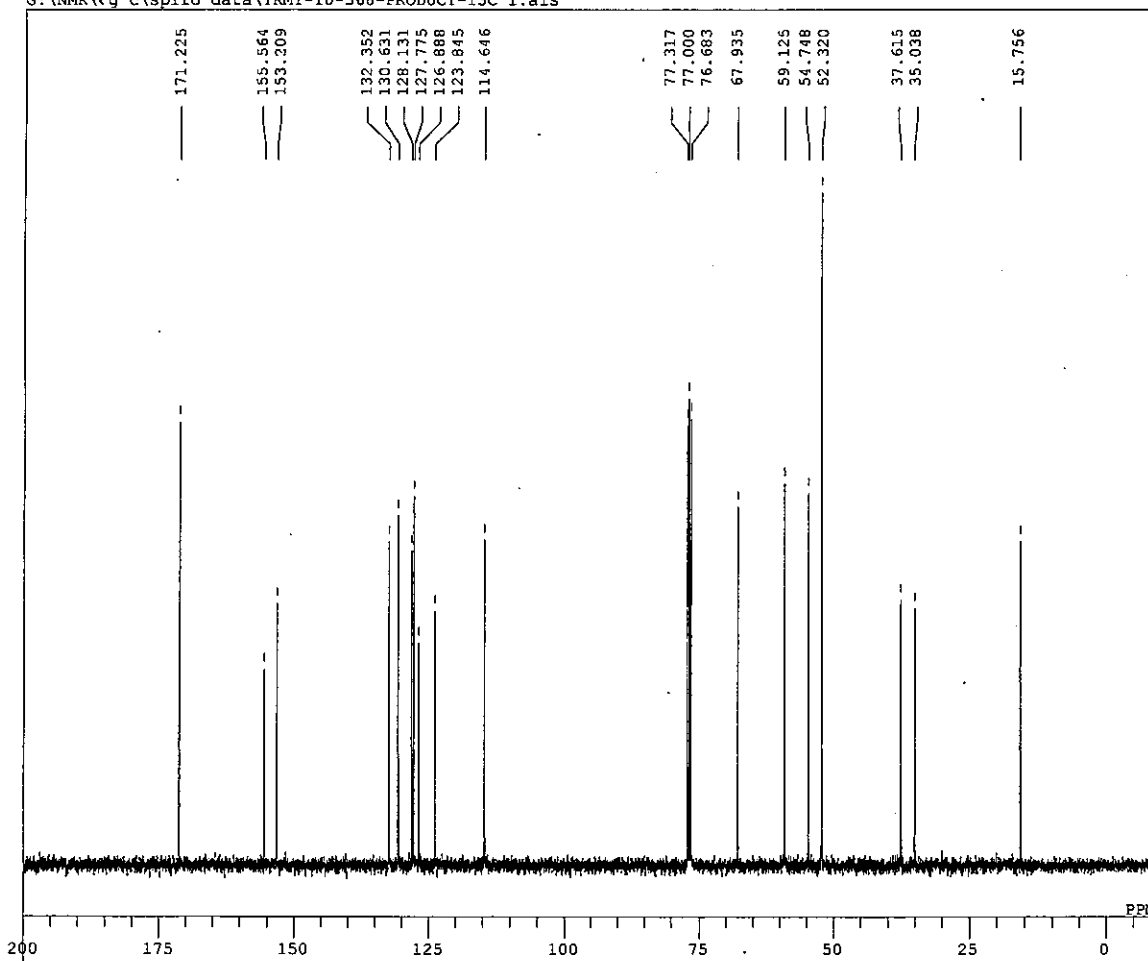

DFILE YKMY-10-368-PRODUCT-13C 1.a  
COMNT YKMY-10-368-PRODUCT-13C  
DATIM 27-FEB-2010 05:20:00  
OBNUC 13C  
EXMOD single\_pulse\_dec  
OBFREQ 100.00 MHz  
OBSET 536.00 KHz  
OBFIN 361.11 Hz  
POINT 65536  
FREQU 25188.92 Hz  
SCANS 72  
ACQTM 2.6018 sec  
PD 1.5000 sec  
FWL 3.50 usec  
IRNUC 1H  
CTEMP 22.2 c  
SLVNT CDCL3  
EXREF 77.00 ppm  
BF 1.20 Hz  
RGAIN 24

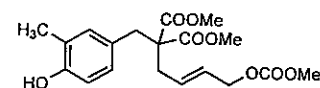

<sup>13</sup>C NMR: 3k

# YKYI-m-mal-3-1H

G:\NMR\12<2008\N\X\01-N\~ \*q-pdij-uj\D m-malonate\YI-m-malonate-3-1H 1.als

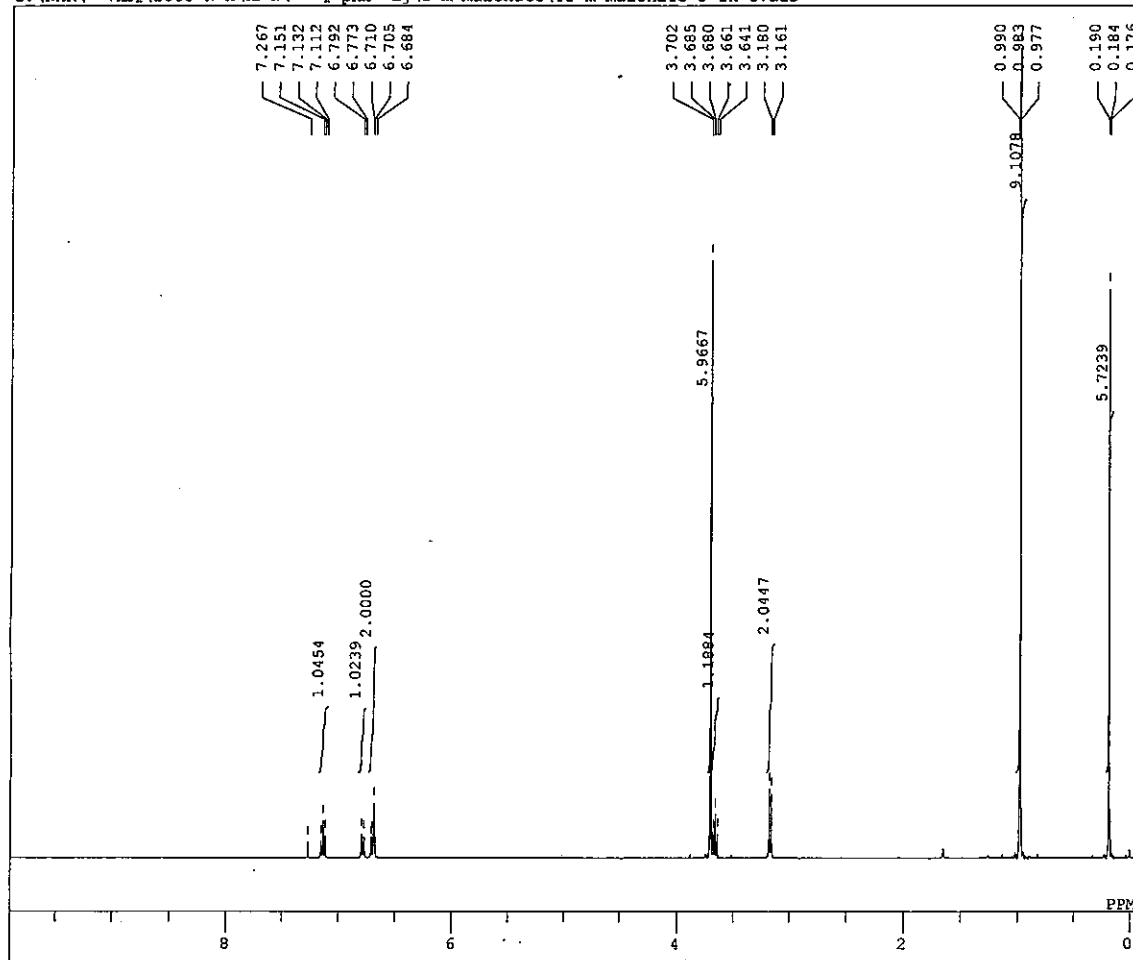

DFILE YI-m-malonate-3-1H\_1.als  
COMNT YKYI-m-mal-3-1H  
DATIM 25-NOV-2008 18:48:29  
OBNUC 1H  
EXMOD single\_pulse.exp  
OBFRQ 399.00 MHz  
OBSET 784.00 KHz  
OBFIN 597.07 Hz  
POINT 32768  
FREQU 5998.80 Hz  
SCANS 8  
ACQTM 5.4624 sec  
PD 2.0000 sec  
PW1 6.70 usec  
IRNUC 1H  
CTEMP 18.7 c  
SLVNT CDCL3  
EXREF 0.00 ppm  
BF 0.12 Hz  
RGAIN 11

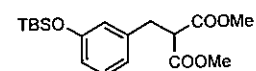

<sup>1</sup>H-NMR: S-9

# YKYI-m-mal-3-13C

G:\NMR\12<2008\N\X\01-N\~ \*q-pdij-uj\D m-malonate\YI-m-malonate-3-13C 1.als

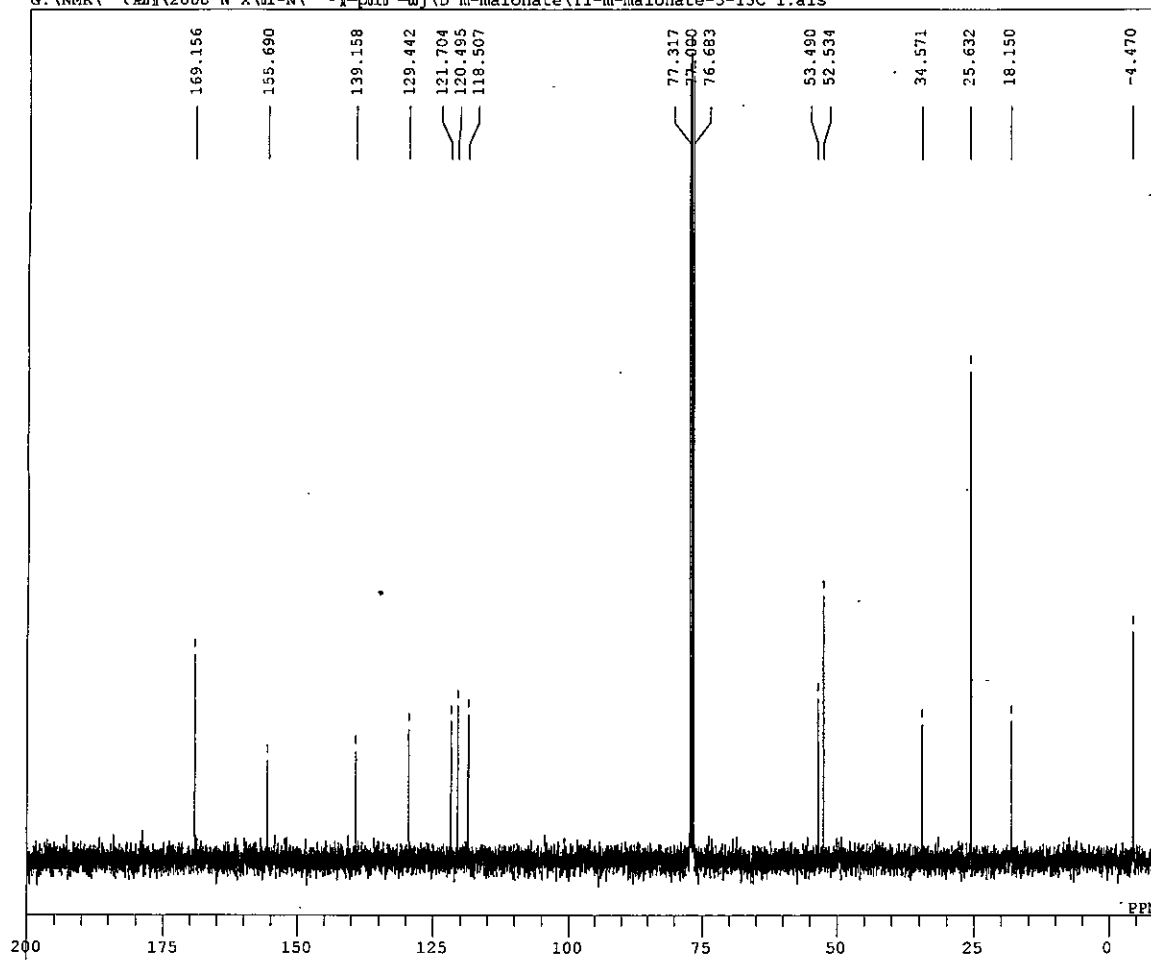

DFILE YI-m-malonate-3-13C\_1.als  
COMNT YKYI-m-mal-3-13C  
DATIM 25-NOV-2008 19:02:24  
OBNUC 13C  
EXMOD single\_pulse\_dec  
OBFRQ 100.00 MHz  
OBSET 536.00 KHz  
OBFIN 361.11 Hz  
POINT 65536  
FREQU 25188.92 Hz  
SCANS 156  
ACQTM 2.6018 sec  
PD 1.5000 sec  
PW1 3.50 usec  
IRNUC 1H  
CTEMP 20.1 c  
SLVNT CDCL3  
EXREF 77.00 ppm  
BF 1.20 Hz  
RGAIN 26

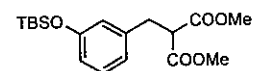

<sup>13</sup>C NMR: S-9

# YKYI-m-mal-2-1H

G:\NMR\12<2008\N\X\Uf-N\ - 9-plil-Uj\D m-malonate\YI-m-malonate-2-1H 1.als

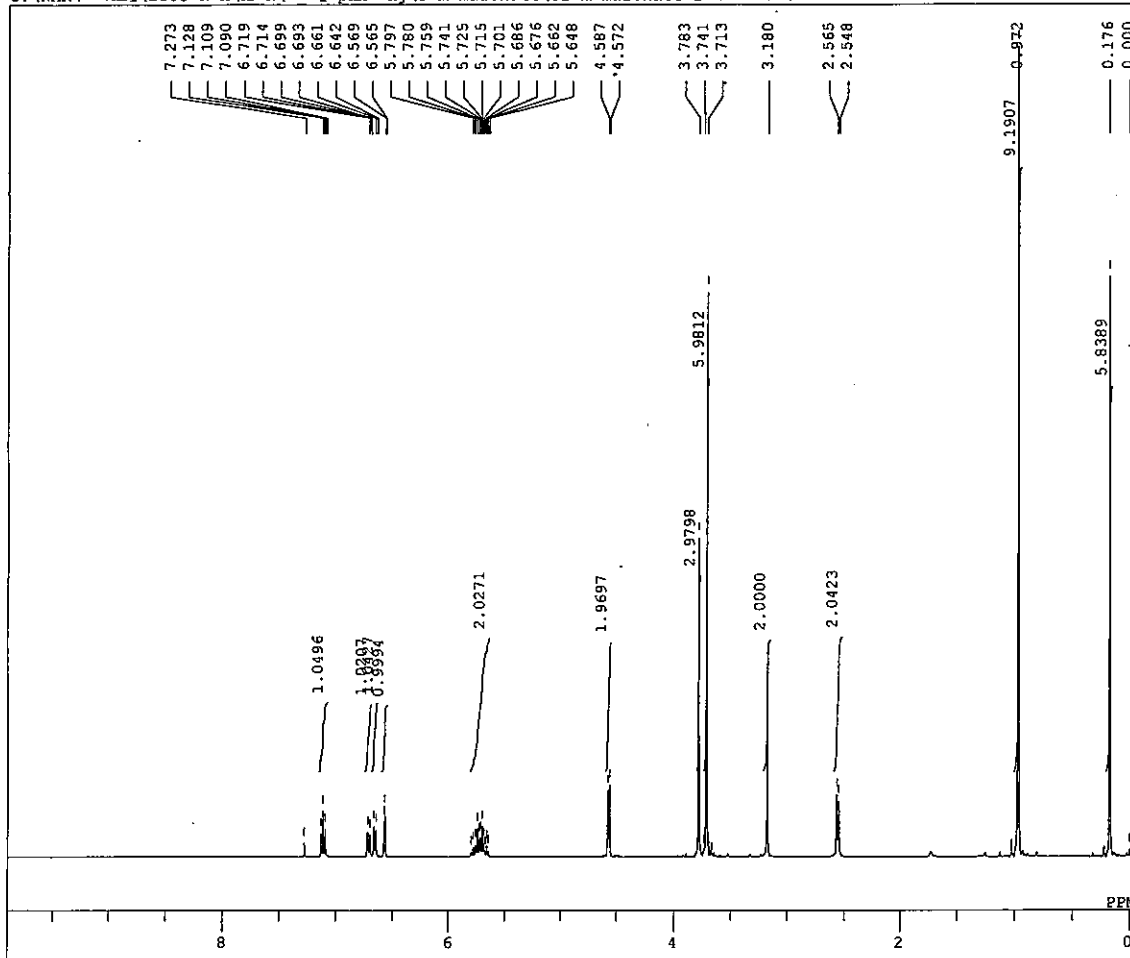

DFILE YI-m-malonate-2-1H\_1.als  
COMNT YKYI-m-mal-2-1H  
DATIM 26-NOV-2008 18:57:52  
OBNUC 1H  
EXMOD single\_pulse.exp  
OBFRQ 399.00 MHz  
OBSET 784.00 KHz  
OBFIN 597.07 Hz  
POINT 32768  
FREQU 5998.80 Hz  
SCANS 8  
ACQTM 5.4624 sec  
PD 2.0000 sec  
PWL 6.70 usec  
IRNUC 1H  
CTEMP 18.5 c  
SLVNT CDCL3  
EXREF 0.00 ppm  
BF 0.12 Hz  
RGAIN 9

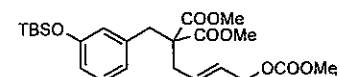

<sup>1</sup>H-NMR: S-10

# YKYI-m-mal-2-13C

G:\NMR\12<2008\N\X\Uf-N\ - 9-plil-Uj\D m-malonate\YI-m-malonate-2-13C 1.als

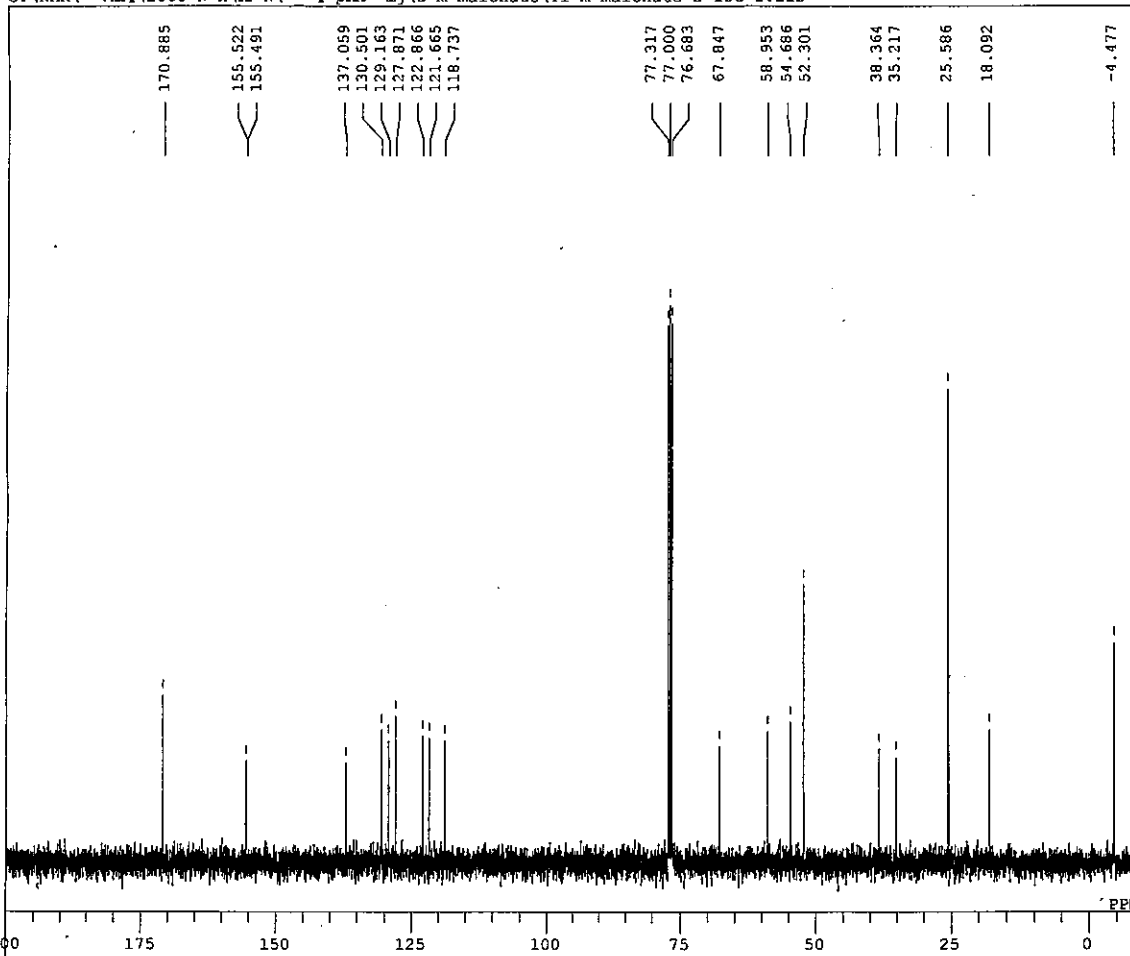

DFILE YI-m-malonate-2-13C\_1.als  
COMNT YKYI-m-mal-2-13C  
DATIM 28-NOV-2008 18:30:07  
OBNUC 13C  
EXMOD single\_pulse\_dec  
OBFRQ 100.00 MHz  
OBSET 536.00 KHz  
OBFIN 361.11 Hz  
POINT 65536  
FREQU 25188.92 Hz  
SCANS 99  
ACQTM 2.6018 sec  
PD 1.5000 sec  
PWL 3.50 usec  
IRNUC 1H  
CTEMP 25.0 c  
SLVNT CDCL3  
EXREF 77.00 ppm  
BF 1.20 Hz  
RGAIN 26

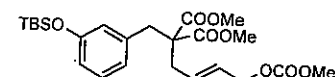

<sup>13</sup>C NMR: S-10

# YKYI-m-mal-1

G:\NMR\12<2008"N"x\02-N\~\*q-p0if-0j\D m-malonate\YI-m-malonate-1-1H 1.als

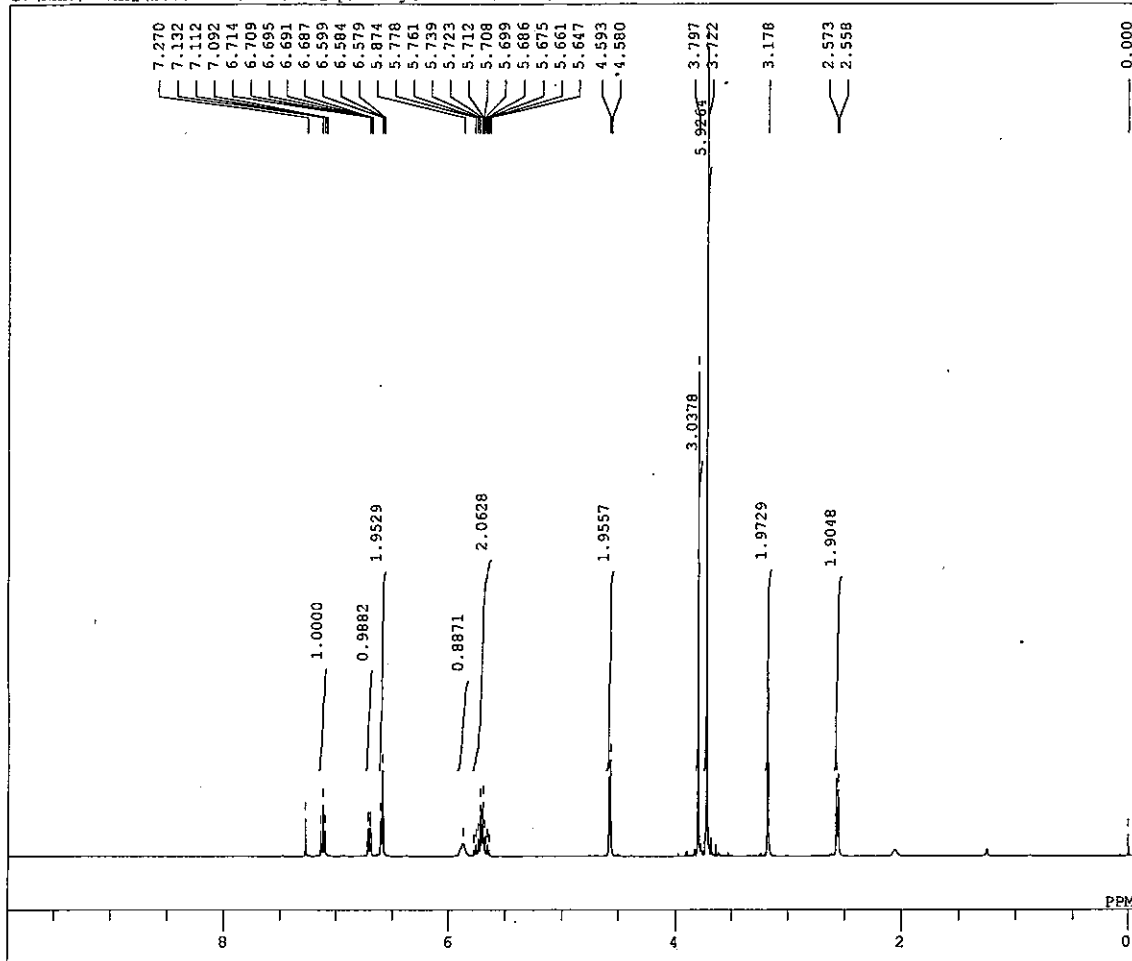

DFILE YI-m-malonate-1-1H\_1.als  
COMNT YKYI-m-mal-1  
DATIM 27-NOV-2008 13:45:30  
OBNUC 1H  
EXMOD single pulse.exp  
OBFRQ 399.00 MHz  
OBSET 784.00 KHz  
OBFIN 597.07 Hz  
POINT 32768  
FREQU 5998.80 Hz  
SCANS 8  
ACQTM 5.4624 sec  
PD 2.0000 sec  
PW1 6.70 usec  
IRNUC 1H  
CTEMP 18.6 c  
SLVNT CDCL3  
EXREF 0.00 ppm  
BF 0.12 Hz  
RGAIN 13

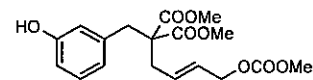

<sup>1</sup>H-NMR: 1

# YKYI-m-mal-1-13C

G:\NMR\12<2008"N"x\02-N\~\*q-p0if-0j\D m-malonate\YI-m-malonate-1-13C 1.als

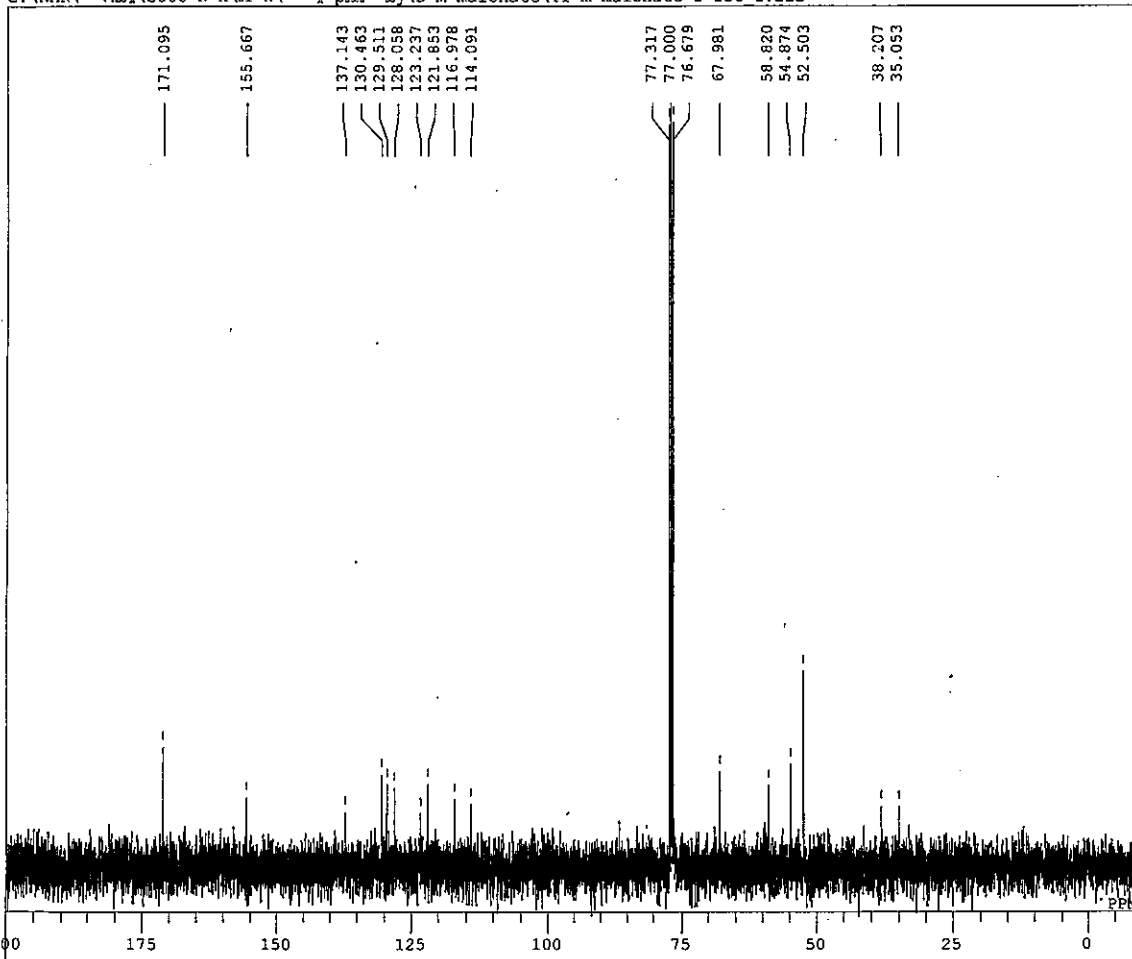

DFILE YI-m-malonate-1-13C\_1.als  
COMNT YKYI-m-mal-1-13C  
DATIM 27-NOV-2008 13:48:58  
OBNUC 13C  
EXMOD single pulse dec  
OBFRQ 100.00 MHz  
OBSET 536.00 KHz  
OBFIN 361.11 Hz  
POINT 65536  
FREQU 25188.92 Hz  
SCANS 32  
ACQTM 2.6018 sec  
PD 1.5000 sec  
PW1 3.50 usec  
IRNUC 1H  
CTEMP 19.4 c  
SLVNT CDCL3  
EXREF 77.00 ppm  
BF 1.20 Hz  
RGAIN 26

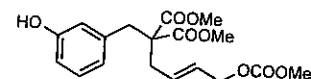

<sup>13</sup>C NMR: 1

# YKYI-p-NTs-3-1H

G:\NMR\12<81\2008\N\X\11-N\ - 1-p-NTs\YI-p-NTs-3-1H 1.als

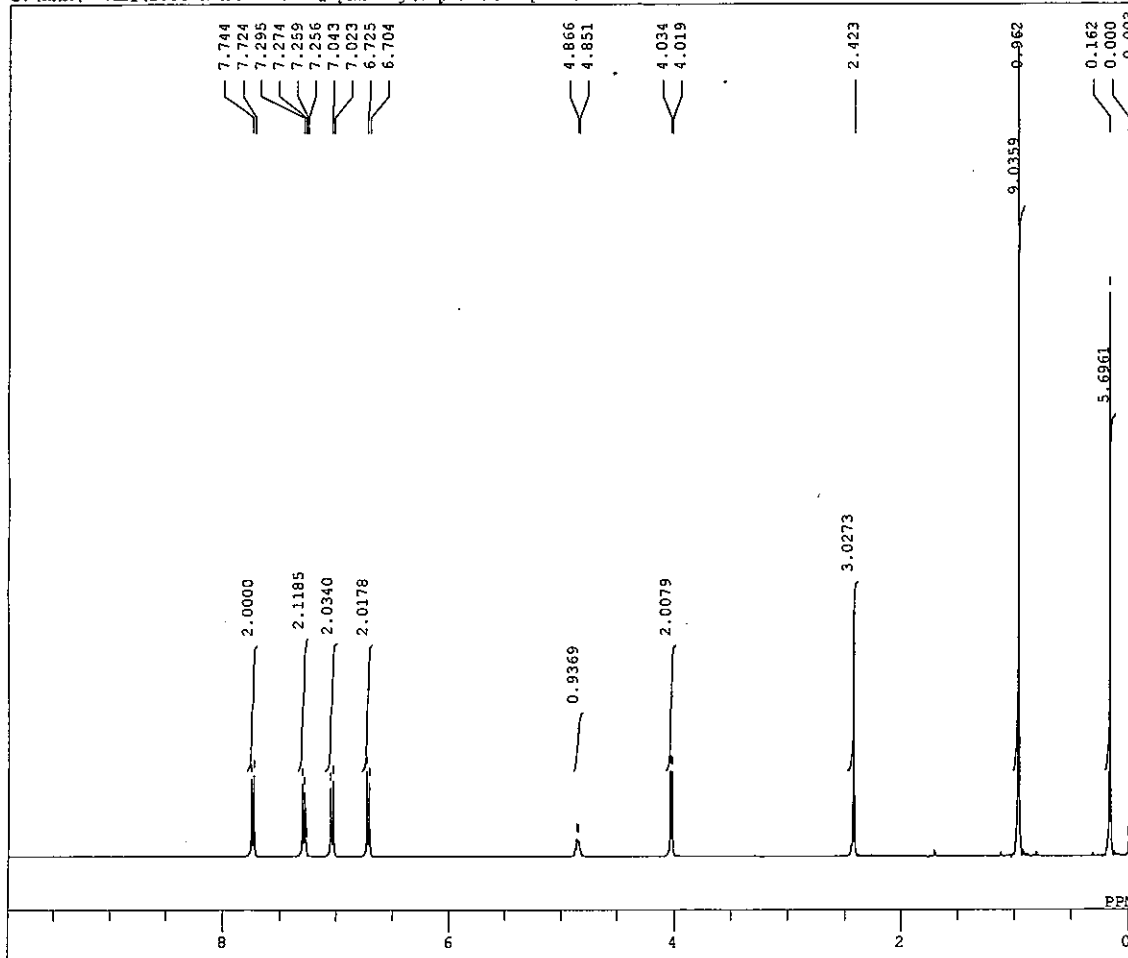

DFILE YI-p-NTs-3-1H 1.als  
COMNT KYKI-p-NTs-3-1H  
DATIM 8-DEC-2008 12:52:58  
OBNUC 1H  
EXMOD single\_pulse.exp  
OBFRQ 399.00 MHz  
OBSET 784.00 KHz  
OBFIN 597.07 Hz  
POINT 32768  
FREQU 5998.80 Hz  
SCANS 8  
ACQTM 5.4624 sec  
PD 2.0000 sec  
FW1 6.70 usec  
IRNUC 1H  
CTEMP 18.5 c  
SLVNT CDCL3  
EXREF 0.00 ppm  
BF 0.12 Hz  
RGAIN 11

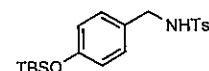

<sup>1</sup>H-NMR: S-11

# YKYI-p-NTs-3-13C

G:\NMR\12<81\2008\N\X\11-N\ - 1-p-NTs\YI-p-NTs-3-13C 1.als

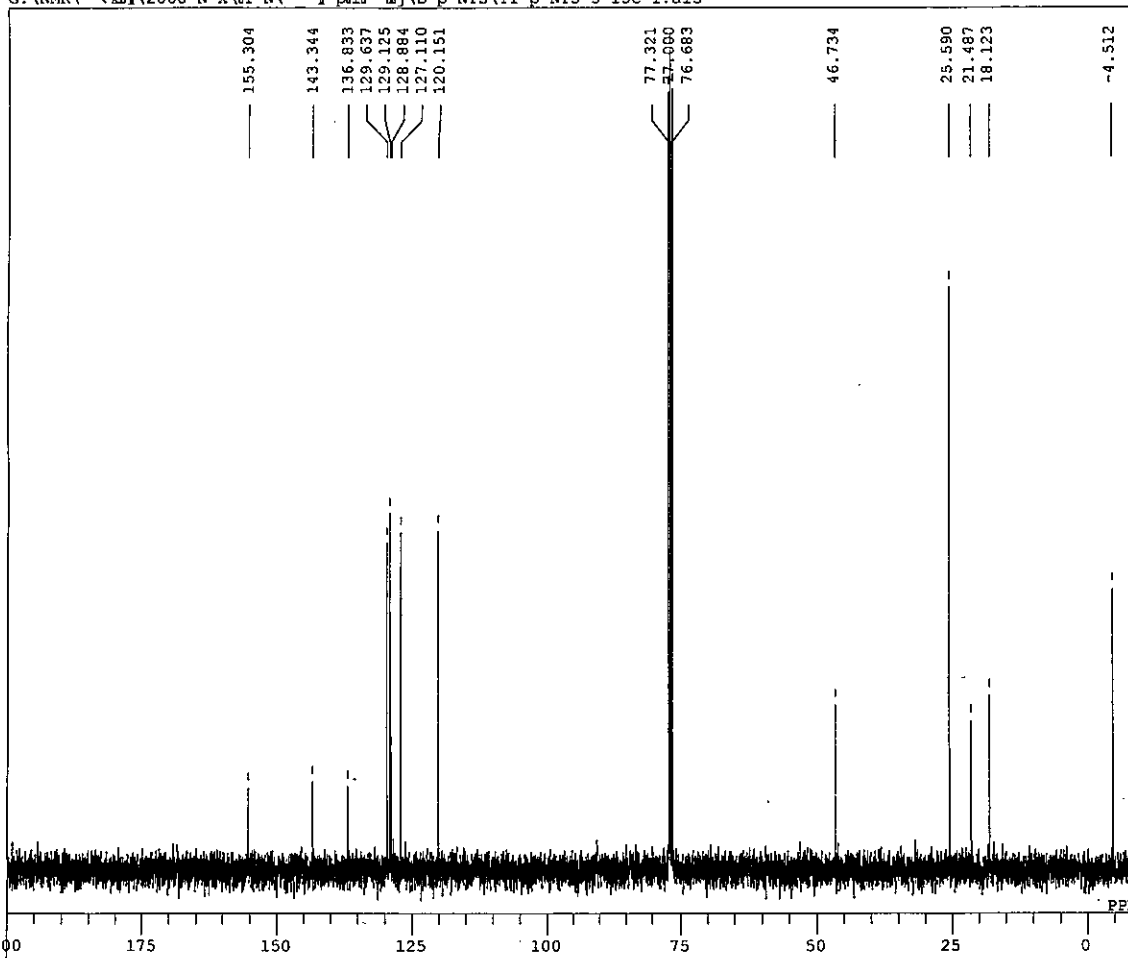

DFILE YI-p-NTs-3-13C 1.als  
COMNT KYKI-p-NTs-3-13C  
DATIM 8-DEC-2008 13:08:29  
OBNUC 13C  
EXMOD single\_pulse\_dec  
OBFRQ 100.00 MHz  
OBSET 536.00 KHz  
OBFIN 361.11 Hz  
POINT 65536  
FREQU 25188.92 Hz  
SCANS 184  
ACQTM 2.6018 sec  
PD 1.5000 sec  
FW1 3.50 usec  
IRNUC 1H  
CTEMP 19.8 c  
SLVNT CDCL3  
EXREF 77.00 ppm  
BF 1.20 Hz  
RGAIN 26

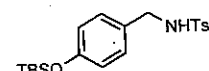

<sup>13</sup>C NMR: S-11

# YKYI-p-NTs-2-1H

G:\NMR\12<2008\N\X\YI-N\YI-p-NTs-2-1H 1.als

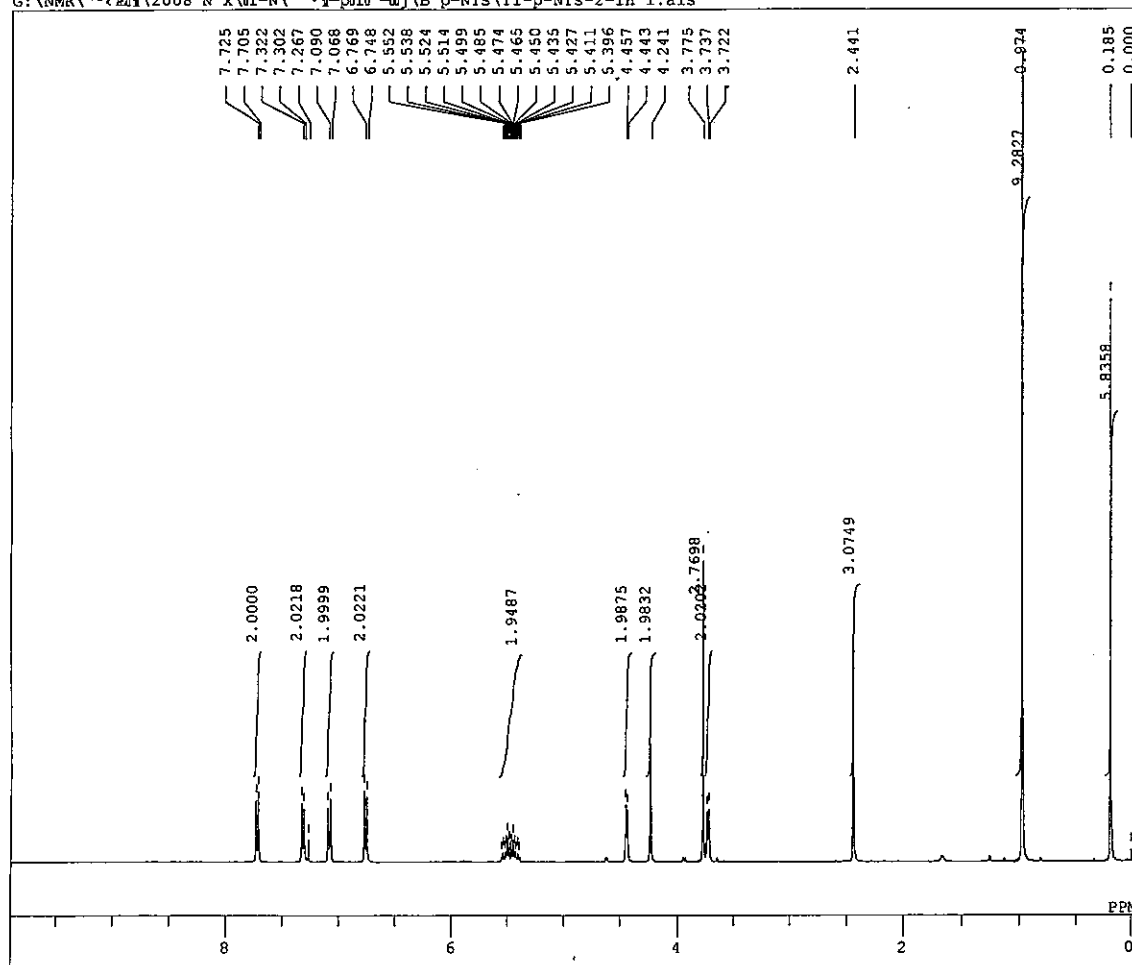

FILE YI-p-NTs-2-1H 1.als  
 COMNT YKYI-p-NTs-2-1H  
 DATIM 10-DEC-2008 12:40:48  
 OBNUC 1H  
 EXMOD single\_pulse.exp  
 OBFRQ 399.00 MHz  
 OBSET 784.00 KHz  
 OBFIN 597.07 Hz  
 POINT 32768  
 FREQU 5998.80 Hz  
 SCANS 8  
 ACQTM 5.4624 sec  
 PD 2.0000 sec  
 PW1 6.70 usec  
 IRNUC 1H  
 CTEMP 18.8 c  
 SLVNT CDCL3  
 EXREF 0.00 ppm  
 BF 0.12 Hz  
 RGAIN 12

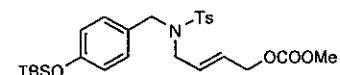

<sup>1</sup>H-NMR: S-12

# YKYI-NTs-2-13C

G:\NMR\12<2008\N\X\YI-N\YI-p-NTs-2-13C 1.als

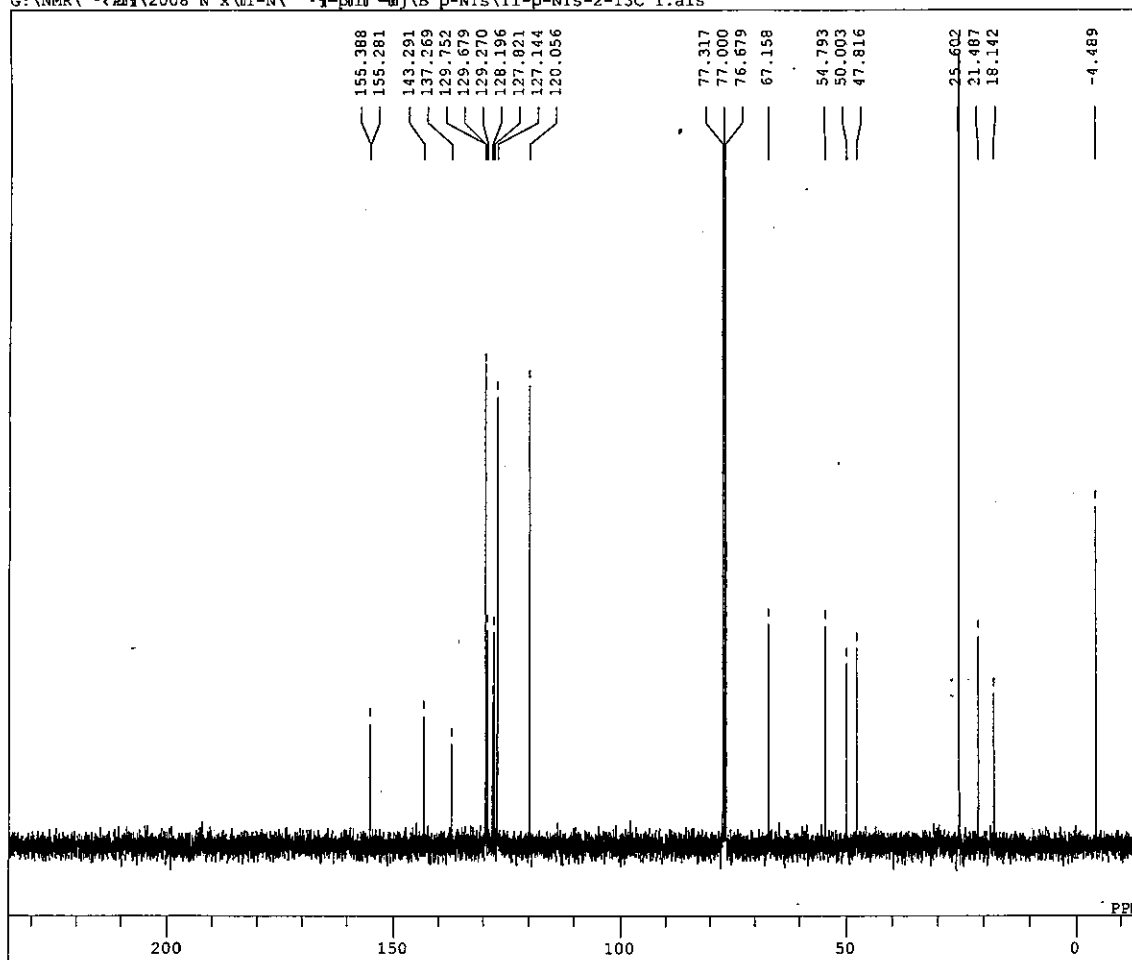

FILE YI-p-NTs-2-13C 1.als  
 COMNT YKYI-NTs-2-13C  
 DATIM 10-DEC-2008 12:47:57  
 OBNUC 13C  
 EXMOD single\_pulse\_dec  
 OBFRQ 100.00 MHz  
 OBSET 536.00 KHz  
 OBFIN 361.11 Hz  
 POINT 65536  
 FREQU 25188.92 Hz  
 SCANS 55  
 ACQTM 2.6018 sec  
 PD 1.5000 sec  
 PW1 3.50 usec  
 IRNUC 13C  
 CTEMP 19.8 c  
 SLVNT CDCL3  
 EXREF 77.00 ppm  
 BF 1.20 Hz  
 RGAIN 25

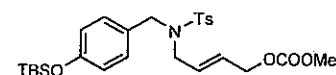

<sup>13</sup>C NMR: S-12

## YKYI-p-NTs-1-1H

G:\NMR\12&lt;04\2008"N"x\01-N\ -q-pli0-Uj\B p-NTs\YI-p-NTs-1-1H 1.als

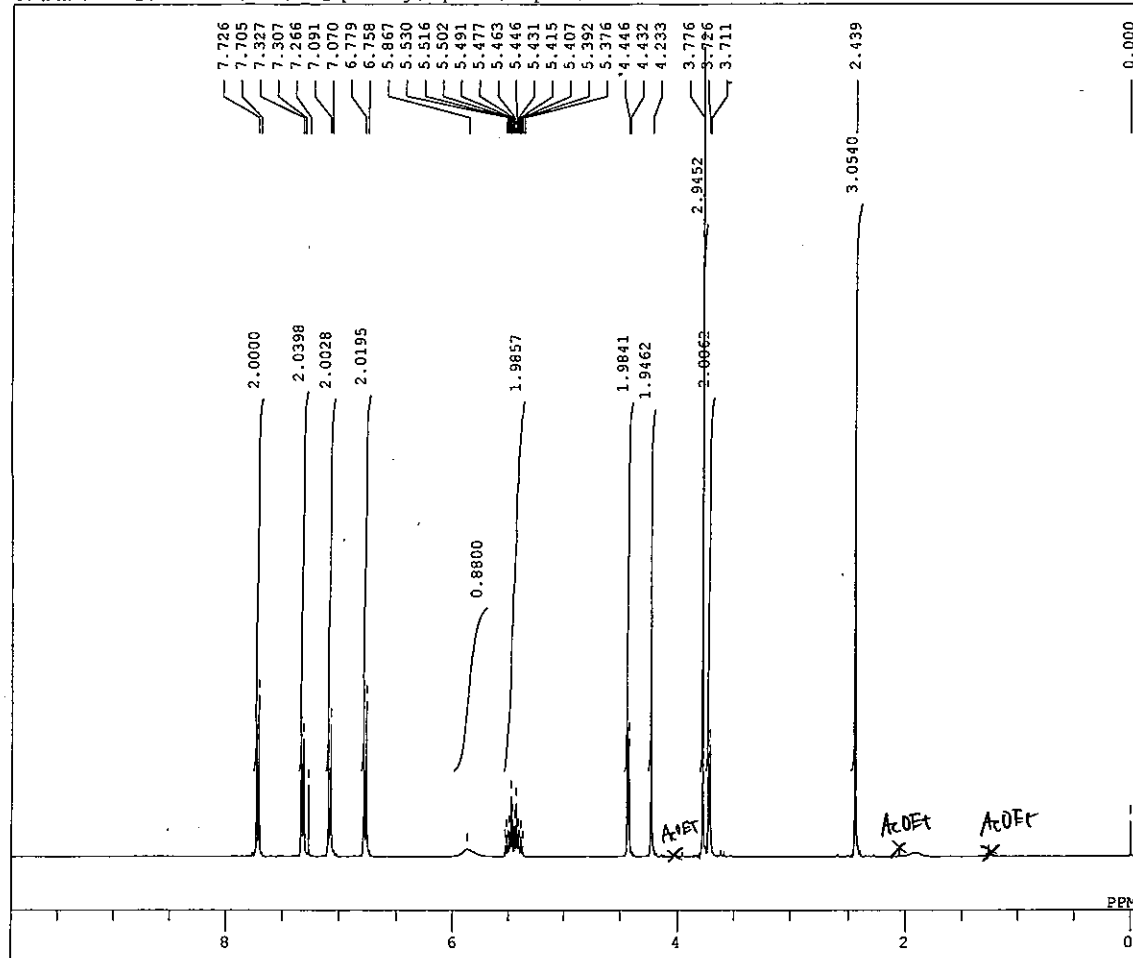

DFILE YI-p-NTs-1-1H 1.als  
 COMNT YKYI-p-NTs-1-1H  
 DATIM 17-NOV-2008 15:45:52  
 OBNUC 1H  
 EXMOD single pulse.exp  
 OBFRQ 399.00 MHz  
 OBSET 784.00 KHz  
 OBFIN 597.07 Hz  
 POINT 32768  
 FREQU 5998.80 Hz  
 SCANS 8  
 ACQTM 5.4624 sec  
 PD 2.0000 sec  
 PW1 6.70 usec  
 IRNUC 1H  
 CTEMP 25.0 c  
 SLVNT CDCL3  
 EXREF 0.00 ppm  
 BF 0.12 Hz  
 RGAIN 13

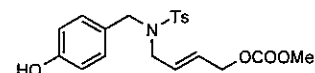<sup>1</sup>H-NMR: 3e

## YKYI-p-NTs-1-13C

G:\NMR\12&lt;04\2008"N"x\01-N\ -q-pli0-Uj\B p-NTs\YI-p-NTs-1-13C 1.als

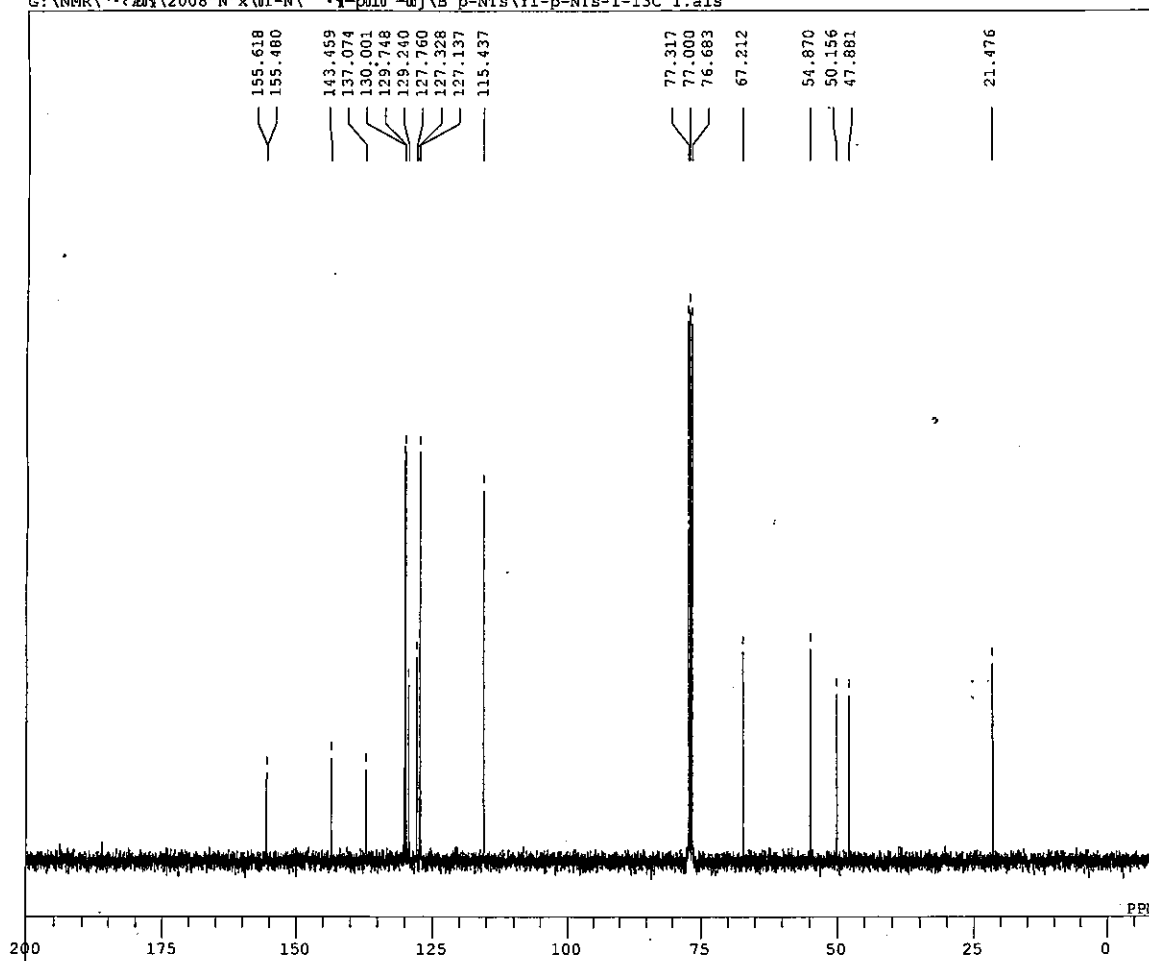

DFILE YI-p-NTs-1-13C 1.als  
 COMNT YKYI-p-NTs-1-13C  
 DATIM 17-NOV-2008 15:52:26  
 OBNUC 13C  
 EXMOD single pulse\_dec  
 OBFRQ 100.00 MHz  
 OBSET 536.00 KHz  
 OBFIN 361.11 Hz  
 POINT 65536  
 FREQU 25188.92 Hz  
 SCANS 77  
 ACQTM 2.6018 sec  
 PD 1.5000 sec  
 PW1 3.50 usec  
 IRNUC 1H  
 CTEMP 25.0 c  
 SLVNT CDCL3  
 EXREF 77.00 ppm  
 BF 1.20 Hz  
 RGAIN 26

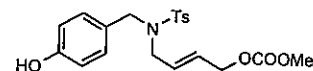<sup>13</sup>C NMR: 3e



G:\NMR\12<EJ\2008"N"x\0f-N\~ •q-p0i0~-0j\H 4-NTs-3-Me\YI-4-NTs-3-Me-3-1H 1.als

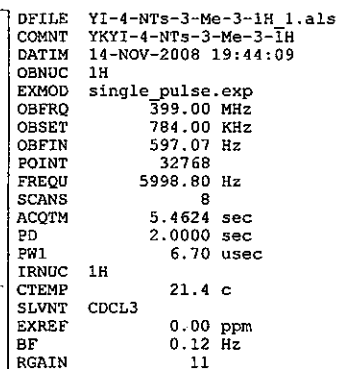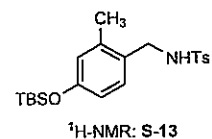

G:\NMR\''~~2008~~\2008"N"x\01-N\~ ·q-p0i11~-0j\H 4-NTs-3-Me\YI-4-NTs-3-Me-3-13C 1.als

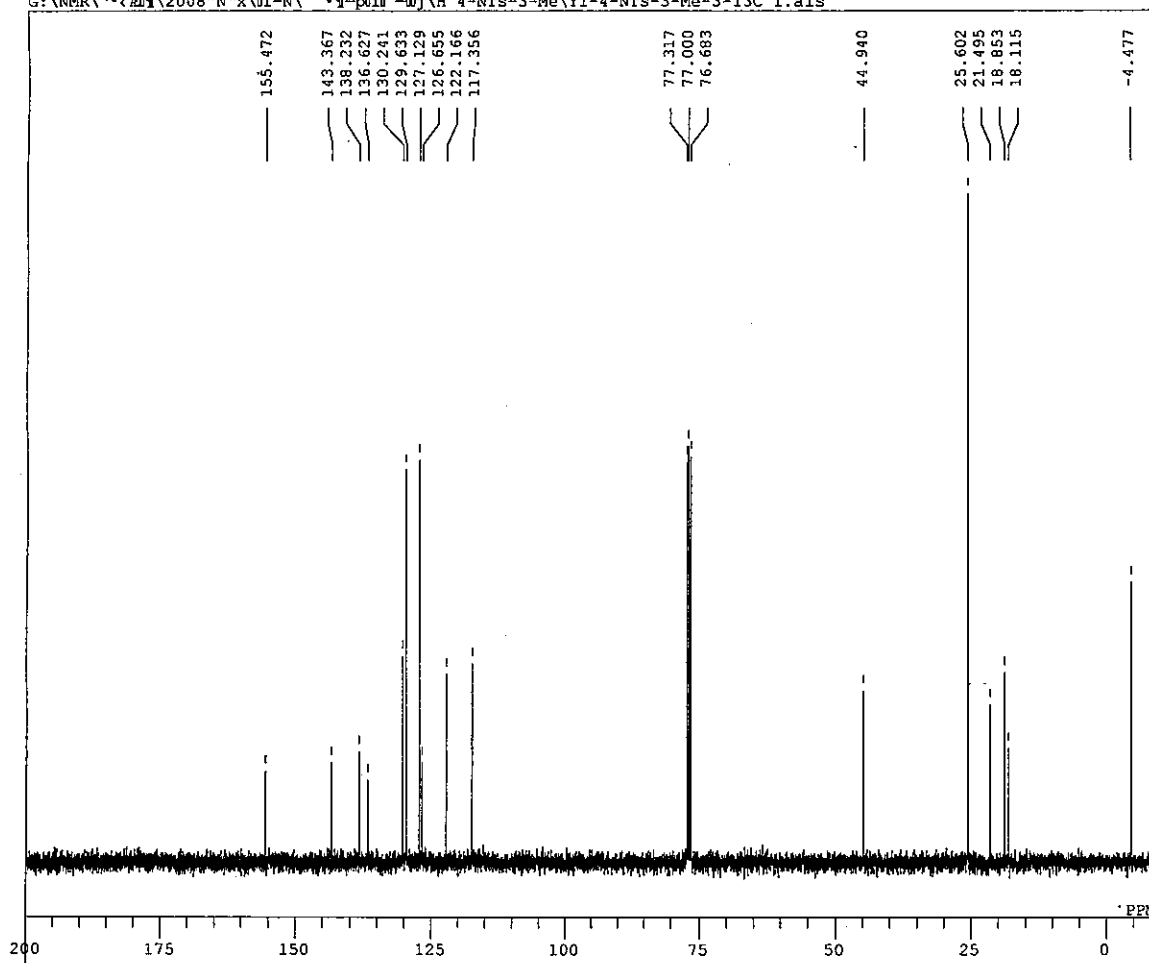

|       |                           |
|-------|---------------------------|
| DFILE | YI-4-NTs-3-Me-3-13C_1.als |
| COMMT | YKYI-4-NTs-3-Me-3-13C     |
| DATIM | 14-NOV-2008 19:47:50      |
| OBNUC | 13C                       |
| EXMOD | single_pulse_dec          |
| OBFRQ | 100.00 MHz                |
| OBSET | 536.00 KHz                |
| OBFIN | 361.11 Hz                 |
| POINT | 65536                     |
| FREQU | 25188.92 Hz               |
| SCANS | 34                        |
| ACQTM | 2.6018 sec                |
| PD    | 1.5000 sec                |
| PWL   | 3.50 usec                 |
| IRNUC | 1H                        |
| CTEMP | 22.5 c                    |
| SLVNT | CDCL3                     |
| EXREF | 77.00 ppm                 |
| BF    | 1.20 Hz                   |
| RGAIN | 26                        |

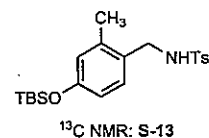

## YK-TN-27-04-SM

G:\NMR\nemoto\DATA-IPSO-FC\YK-TN-27-04-SM 1.als

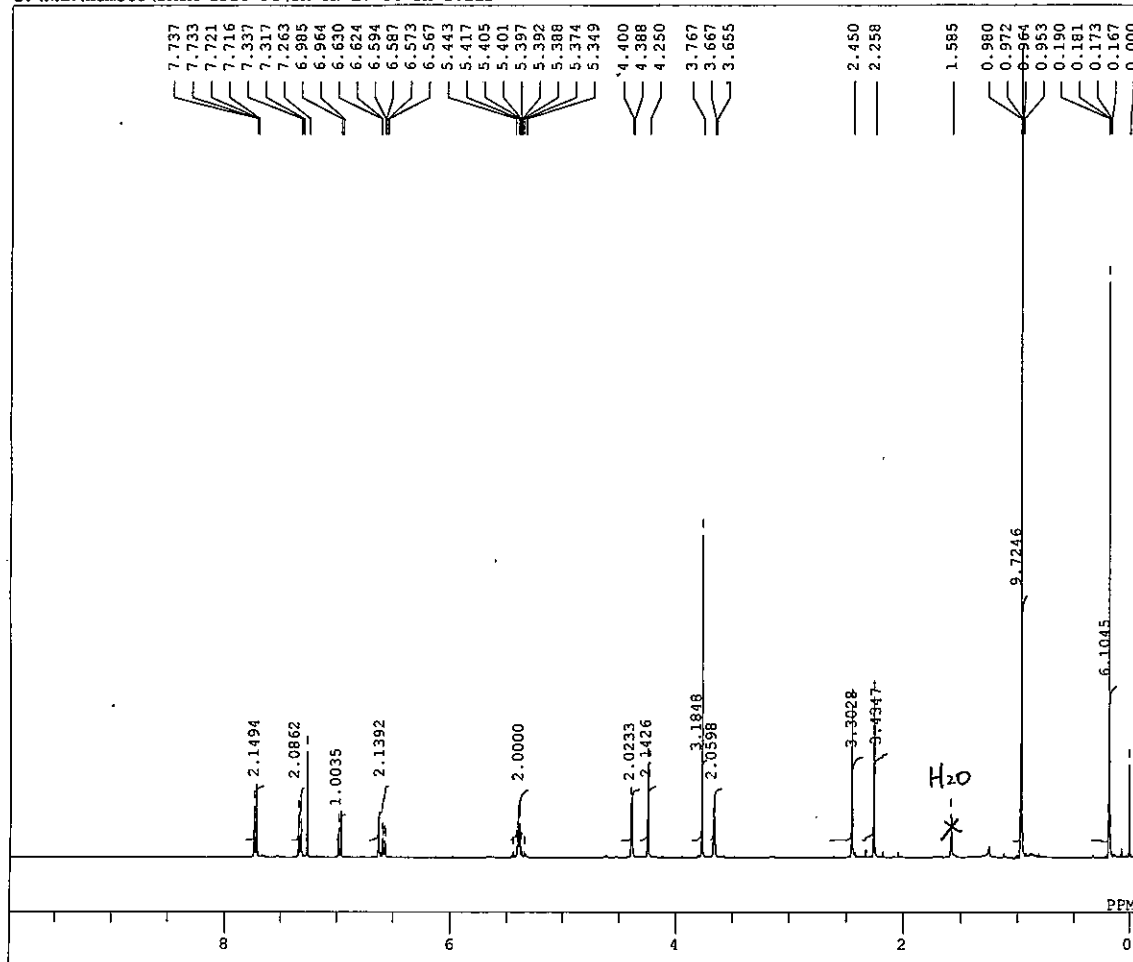

DFILE YK-TN-27-04-SM 1.als  
 COMNT YK-TN-27-04-SM  
 DATIM 13-JUN-2010 03:32:13  
 OBNUC 1H  
 EXMOD single\_pulse.exp  
 OBFRQ 399.00 MHz  
 OBSET 784.00 KHz  
 OBFIN 597.07 Hz  
 POINT 32768  
 FREQU 5998.80 Hz  
 SCANS 7  
 ACQTM 5.4624 sec  
 PD 2.0000 sec  
 PWL 6.85 usec  
 IRNUC 1H  
 CTEMP 21.6 c  
 SLVNT CDCL3  
 EXREF 0.00 ppm  
 BF 0.12 Hz  
 RGAIN 14

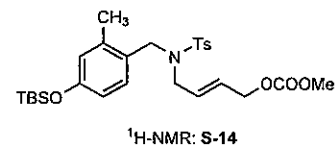

## YKYI-4-NTs-3-Me-2-13C

G:\NMR\2008\N\X\01-N\T-pdi-0-Tj\YKYI-4-NTs-3-Me-2-13C 1.als

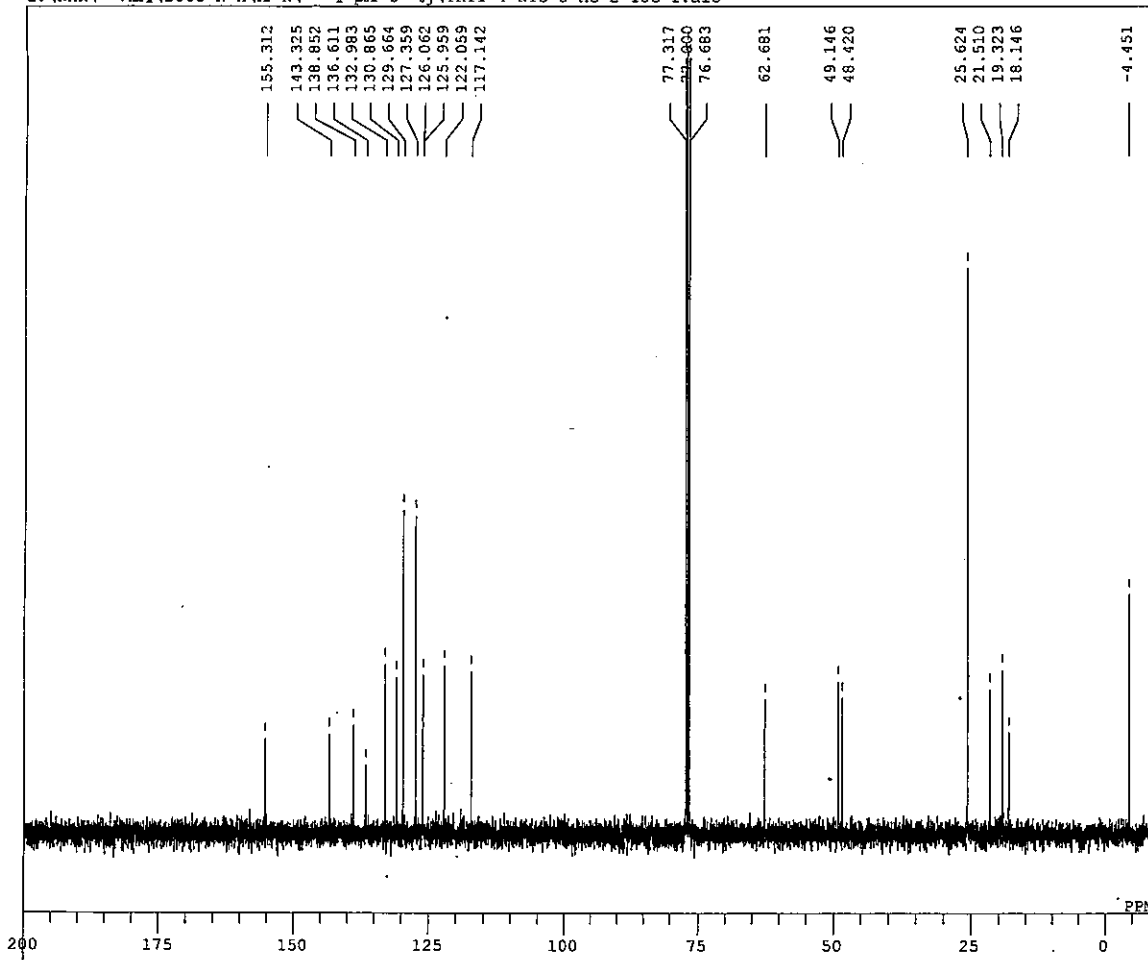

DFILE YKYI-4-NTs-3-Me-2-13C 1.als  
 COMNT YKYI-4-NTs-3-Me-2-13C  
 DATIM 18-NOV-2008 17:50:14  
 OBNUC 13C  
 EXMOD single\_pulse\_dec  
 OBFRQ 100.00 MHz  
 OBSET 536.00 KHz  
 OBFIN 361.11 Hz  
 POINT 65536  
 FREQU 25188.92 Hz  
 SCANS 63  
 ACQTM 2.6018 sec  
 PD 1.5000 sec  
 PWL 3.50 usec  
 IRNUC 13C  
 CTEMP 22.6 c  
 SLVNT CDCL3  
 EXREF 77.00 ppm  
 BF 1.20 Hz  
 RGAIN 26

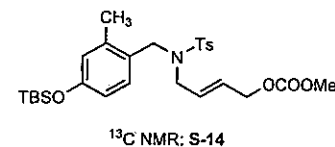

# YKYI-4-NTs-3-Me-1-1H

G:\NMR\12<2008\N"x\01-N\ - 4-pil\H 4-NTs-3-Me\YI-4-NTs-3-Me-1-1H 1.als

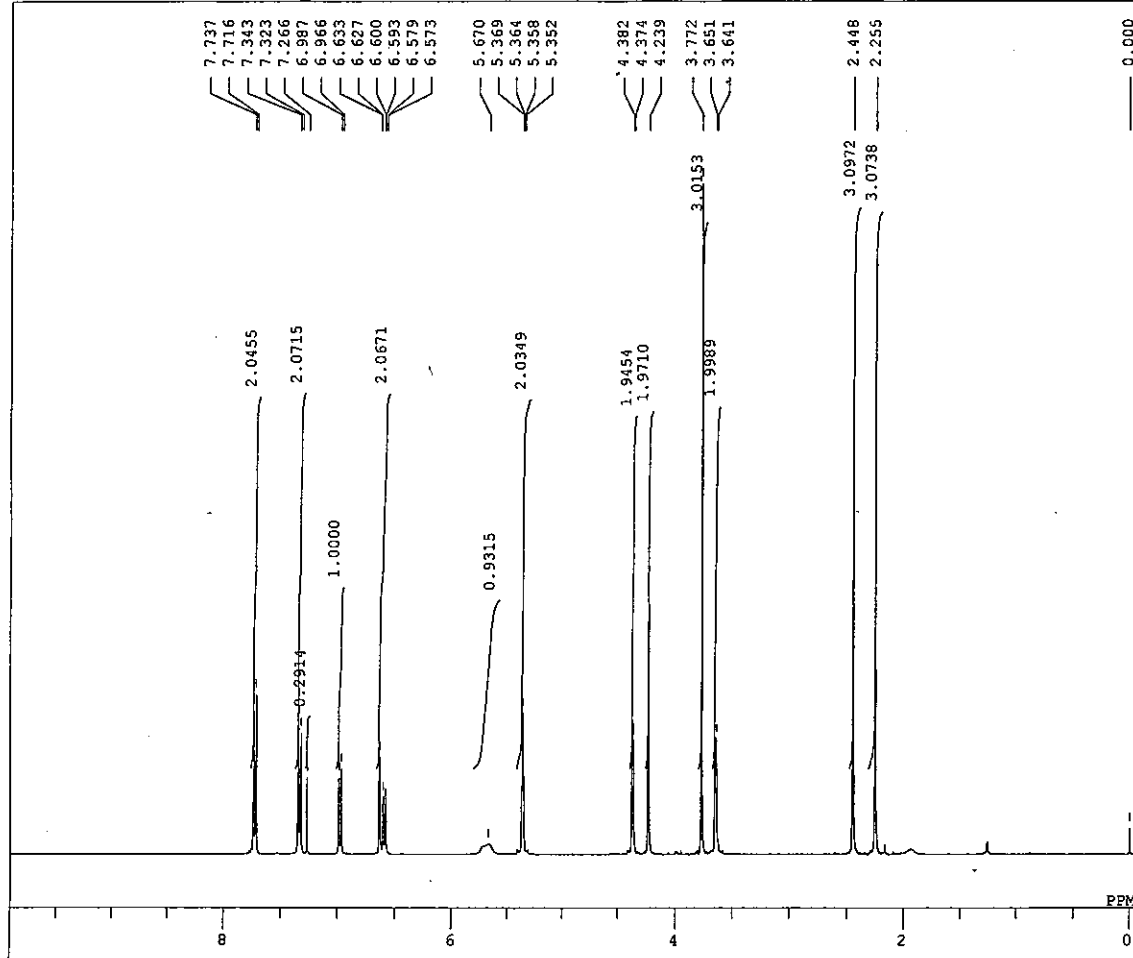

DFILE YI-4-NTs-3-Me-1-1H 1.als  
COMNT YKYI-4-NTs-3-Me-1-1H  
DATIM 18-NOV-2008 17:33:49  
OBNUC 1H  
EXMOD single pulse.exp  
OBFRQ 399.00 MHz  
OBSET 784.00 KHz  
OBFIN 597.07 Hz  
POINT 32768  
FREQU 5998.80 Hz  
SCANS 8  
ACQTM 5.4624 sec  
PD 2.0000 sec  
PWL 6.70 usec  
IRNUC 1H  
CTEMP 20.9 c  
SLVNT CDCL3  
EXREF 0.00 ppm  
BF 0.12 Hz  
RGAIN 13

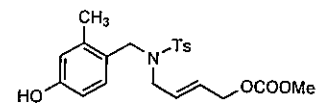

<sup>1</sup>H-NMR: 3i

# YKYI-4-NTs-3-Me-1-13C

G:\NMR\12<2008\N"x\01-N\ - 4-pil\H 4-NTs-3-Me\YI-4-NTs-3-Me-1-13C 1.als

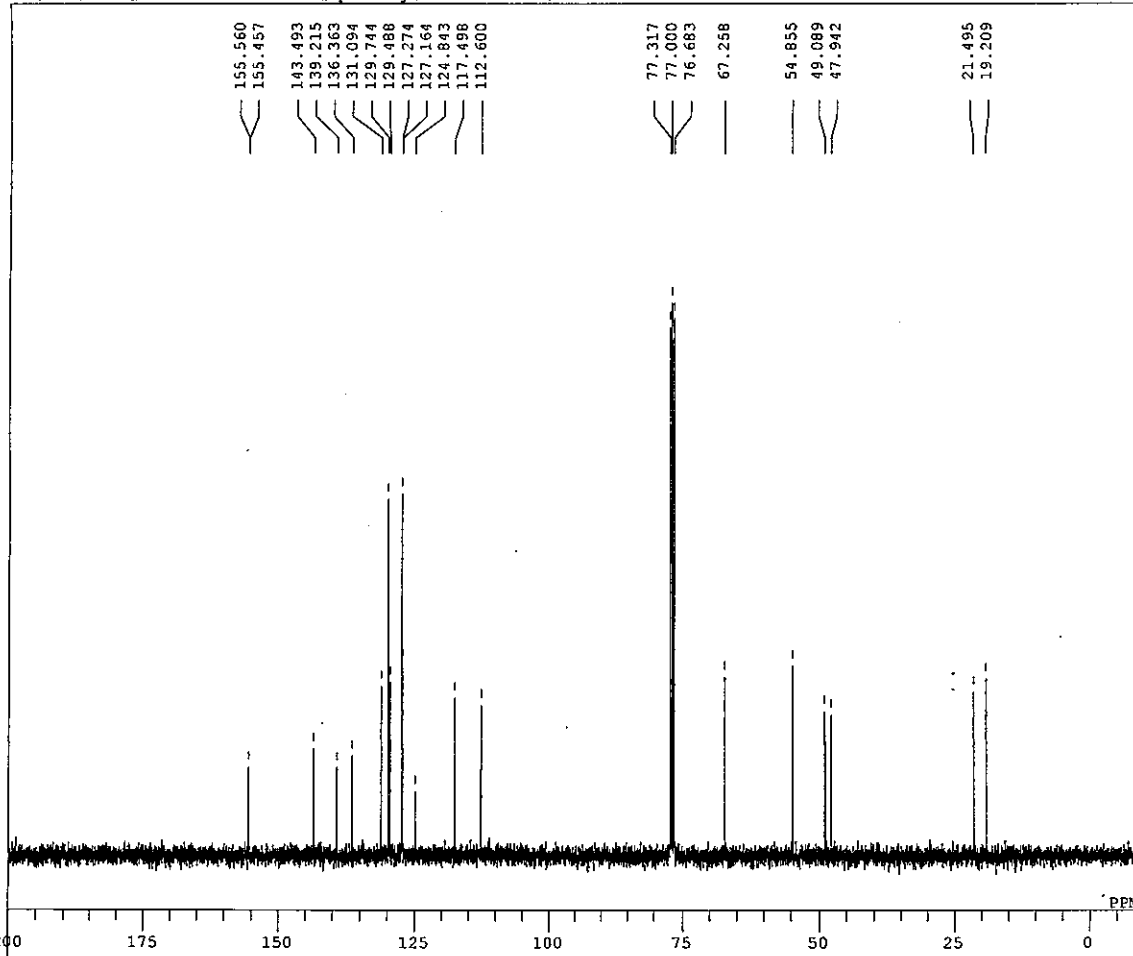

DFILE YI-4-NTs-3-Me-1-13C 1.als  
COMNT YKYI-4-NTs-3-Me-1-13C  
DATIM 18-NOV-2008 17:40:43  
OBNUC 13C  
EXMOD single pulse dec  
OBFRQ 100.00 MHz  
OBSET 536.00 KHz  
OBFIN 361.11 Hz  
POINT 65536  
FREQU 25188.92 Hz  
SCANS 58  
ACQTM 2.6018 sec  
PD 1.5000 sec  
PWL 3.50 usec  
IRNUC 1H  
CTEMP 22.4 c  
SLVNT CDCL3  
EXREF 77.00 ppm  
BF 1.20 Hz  
RGAIN 26

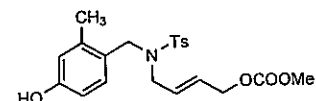

<sup>13</sup>C NMR: 3i

# YKYI-1-NTs-4-nap-3-1H

G:\NMR\2008\N\X\I-N\ -q-pil-Mj\I 4-NTs-1-naphthol\YI-4-NTs-1-naphthol-3-1H 1.als

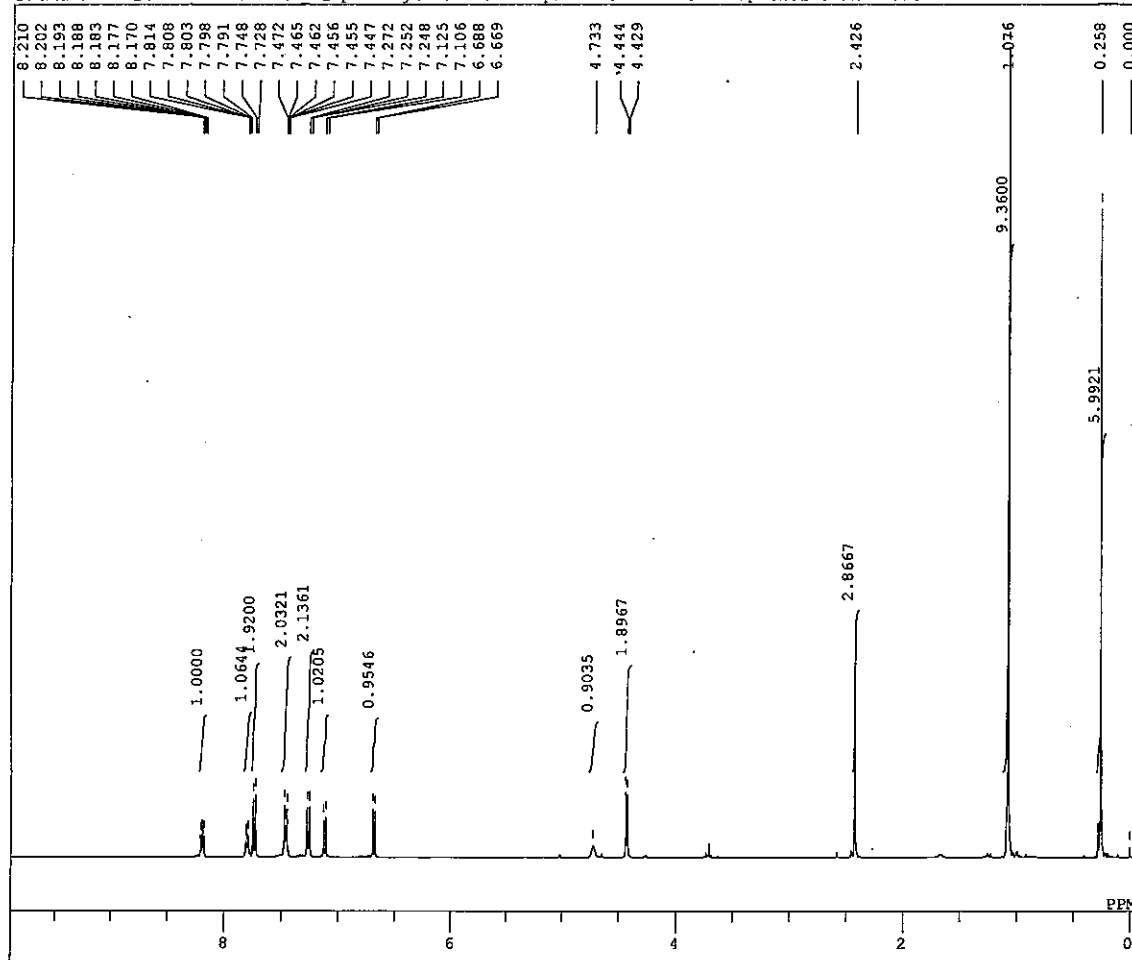

DFILE YI-4-NTs-1-naphthol-3-1H\_1.  
COMNT YKYI-1-NTs-4-nap-3-1H  
DATIM 3-DEC-2008 18:57:26  
OBNUC 1H  
EXMOD single pulse.exp  
OBFRQ 399.00 MHz  
OBSET 784.00 KHz  
OBFIN 597.07 Hz  
POINT 32768  
FREQU 5998.80 Hz  
SCANS 8  
ACQTM 5.4624 sec  
PD 2.0000 sec  
PWL 6.70 usec  
IRNUC 1H  
CTEMP 18.5 c  
SLVNT CDCL3  
EXREF 0.00 ppm  
BF 0.12 Hz  
RGAIN 11

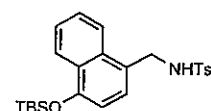

<sup>1</sup>H-NMR: S-15

# YKYI-1-NTs-4-nap-3-13C

G:\NMR\2008\N\X\I-N\ -q-pil-Mj\I 4-NTs-1-naphthol\YI-4-NTs-1-naphthol-3-13C 1.als

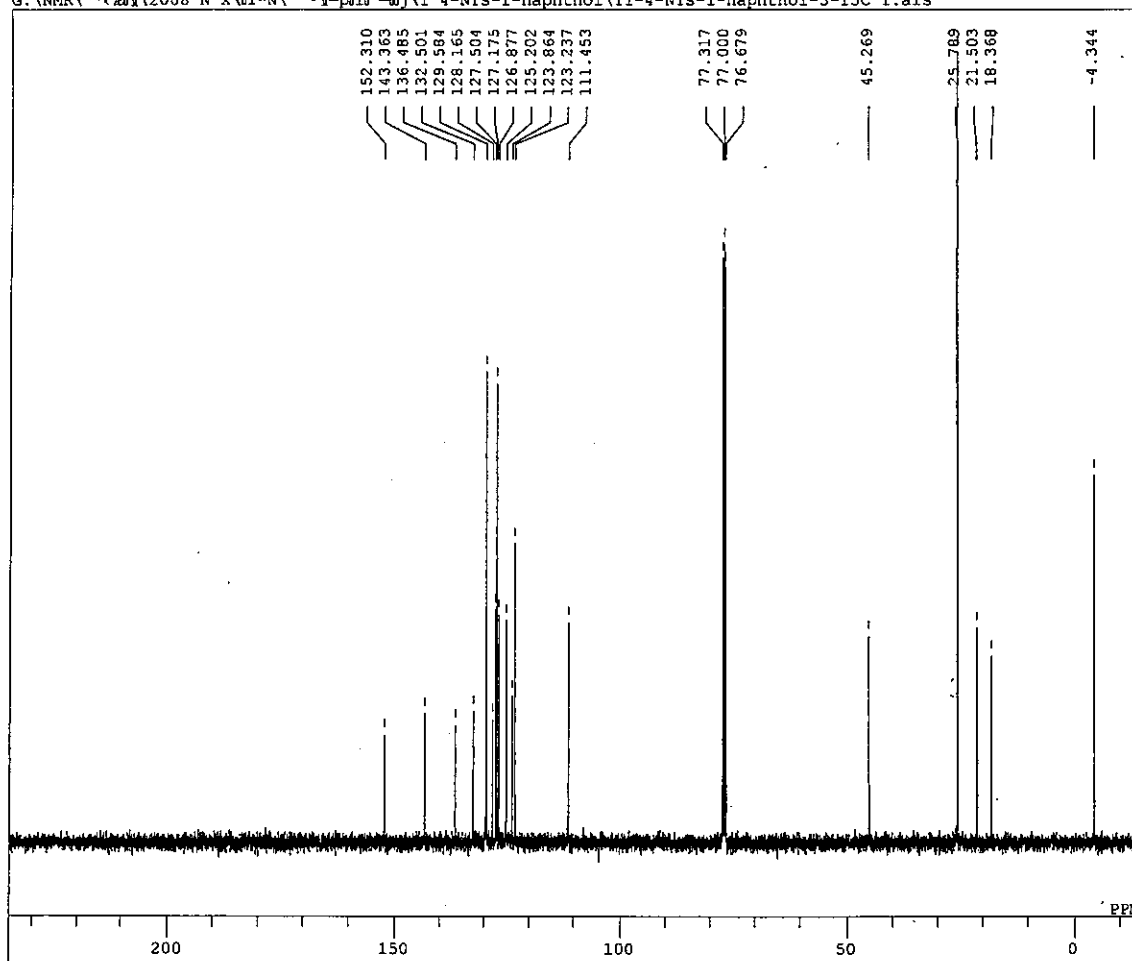

DFILE YI-4-NTs-1-naphthol-3-13C\_1  
COMNT YKYI-1-NTs-4-nap-3-13C  
DATIM 5-DEC-2008 19:08:41  
OBNUC 13C  
EXMOD single pulse\_dec  
OBFRQ 100.00 MHz  
OBSET 536.00 KHz  
OBFIN 361.11 Hz  
POINT 65536  
FREQU 25188.92 Hz  
SCANS 98  
ACQTM 2.6018 sec  
PD 1.5000 sec  
PWL 3.50 usec  
IRNUC 1H  
CTEMP 19.9 c  
SLVNT CDCL3  
EXREF 77.00 ppm  
BF 1.20 Hz  
RGAIN 26

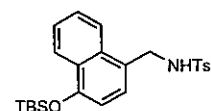

<sup>13</sup>C NMR: S-15

# YKYI-1-NTs-4-nap-2-1H

G:\NMR\2008\N\X\YI-NTs-4-nap-2-1H\YI-4-NTs-1-naphthol\YI-4-NTs-1-naphthol-2-1H 1.als

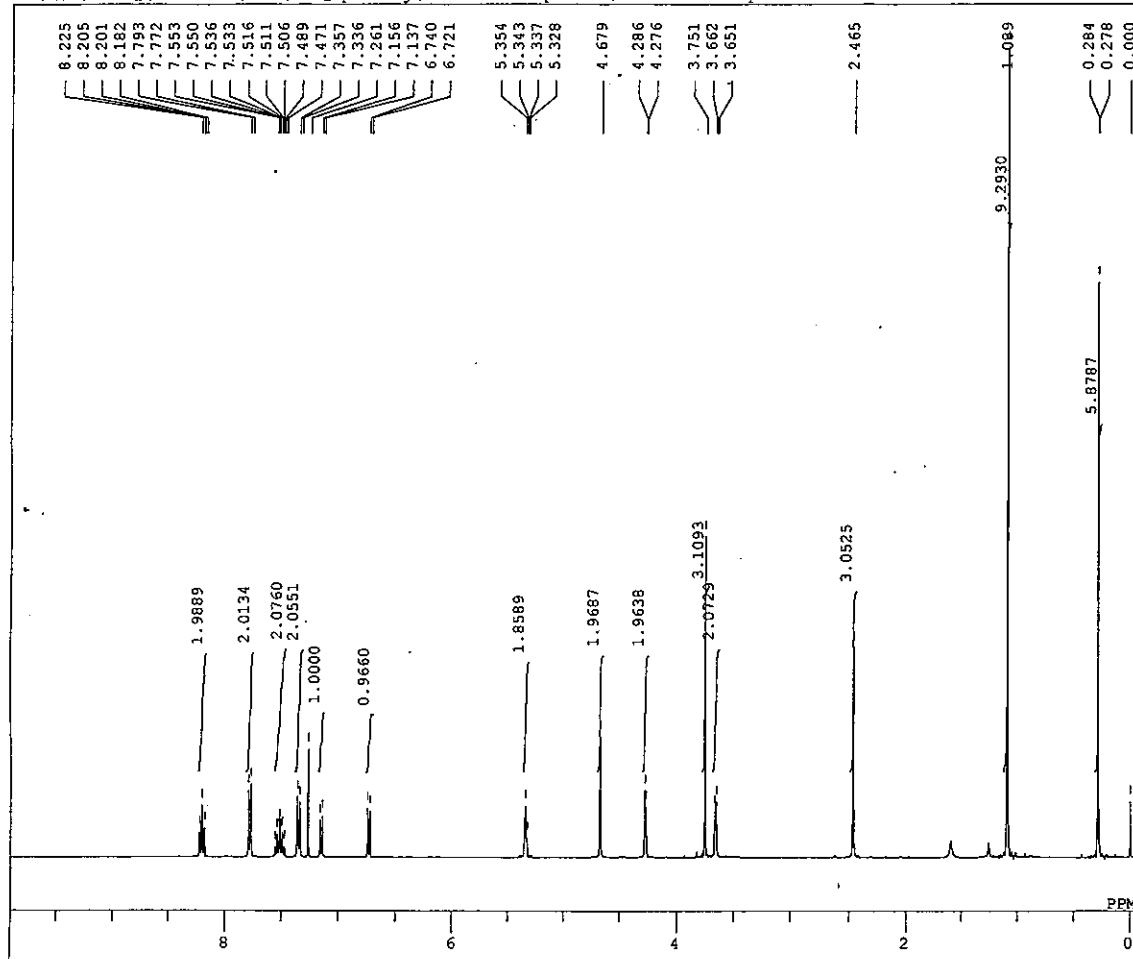

DFILE YI-4-NTs-1-naphthol-2-1H\_1.als  
COMNT YKYI-1-NTs-4-nap-2-1H  
DATIM 3-DEC-2008 19:22:45  
OBNUC 1H  
EXMOD single pulse.exp  
OBFRQ 399.00 MHz  
OBSET 784.00 KHz  
OBFIN 597.07 Hz  
POINT 32768  
FREQU 5998.80 Hz  
SCANS 8  
ACQTM 5.4624 sec  
PD 2.0000 sec  
PW1 6.70 usec  
IRNUC 1H  
CTEMP 18.4 c  
SLVNT CDCL3  
EXREF 0.00 ppm  
BF 0.12 Hz  
RGAIN 16

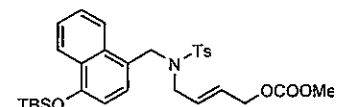

<sup>1</sup>H-NMR: S-16

# YKYI-1-NTs-4-nap-2-13C

G:\NMR\2008\N\X\YI-NTs-4-nap-2-13C\YI-4-NTs-1-naphthol\YI-4-NTs-1-naphthol-2-13C 1.als

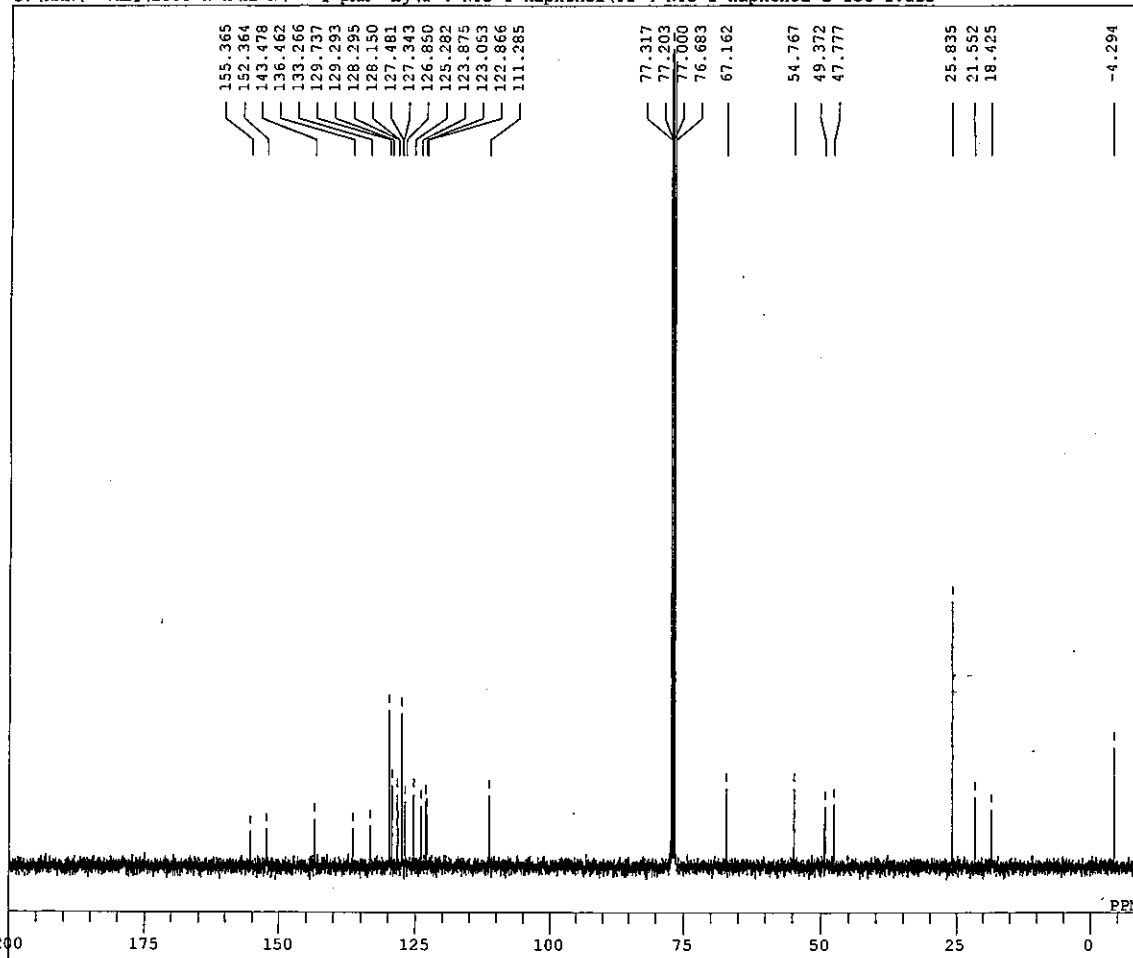

DFILE YI-4-NTs-1-naphthol-2-13C\_1  
COMNT YKYI-1-NTs-4-nap-2-13C  
DATIM 5-DEC-2008 19:30:01  
OBNUC 13C  
EXMOD single pulse dec  
OBFRQ 100.00 MHz  
OBSET 536.00 KHz  
OBFIN 361.11 Hz  
POINT 65536  
FREQU 25188.92 Hz  
SCANS 200  
ACQTM 2.6018 sec  
PD 1.5000 sec  
PW1 3.50 usec  
IRNUC 1H  
CTEMP 19.9 c  
SLVNT CDCL3  
EXREF 77.00 ppm  
BF 1.20 Hz  
RGAIN 26

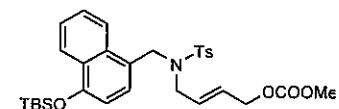

<sup>13</sup>C NMR: S-16

# YKYI-1-NTs-4-nap-1-1H

G:\NMR\12.01\2008\N\X\1-NTs-4-nap-1-1H\YKYI-1-NTs-4-nap-1-1H 1.als

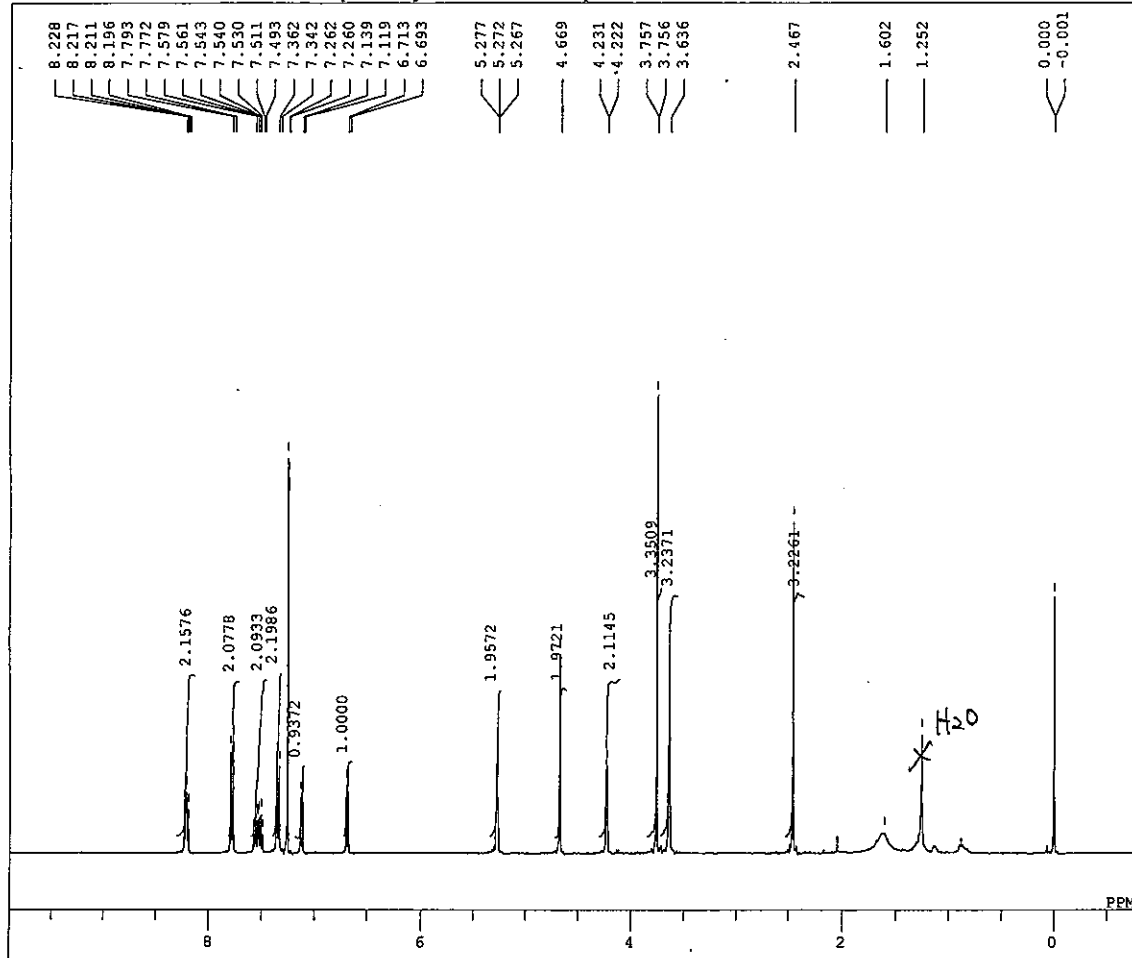

DFILE YKYI-1-NTs-4-nap-1-1H 1.als  
COMNT YKYI-1-NTs-4-nap-1-1H  
DATIM 18-NOV-2008 17:54:45  
OBNUC 1H  
EXMOD single\_pulse.exp  
OBFRQ 399.00 MHz  
OBSET 784.00 KHz  
OBFIN 597.07 Hz  
POINT 32768  
FREQU 5998.80 Hz  
SCANS 8  
ACQTM 5.4624 sec  
PD 2.0000 sec  
PW1 6.70 usec  
IRNUC 1H  
CTEMP 21.0 c  
SLVNT CDCL3  
EXREF 0.00 ppm  
BF 0.12 Hz  
RGAIN 21

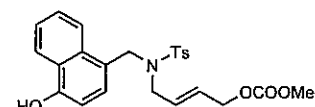

<sup>1</sup>H-NMR: 3j

# YKYI-10-751-13C

G:\NMR\12.01\2008\N\X\1-NTs-4-nap-1-1H\YKYI-10-751-13C 1.als

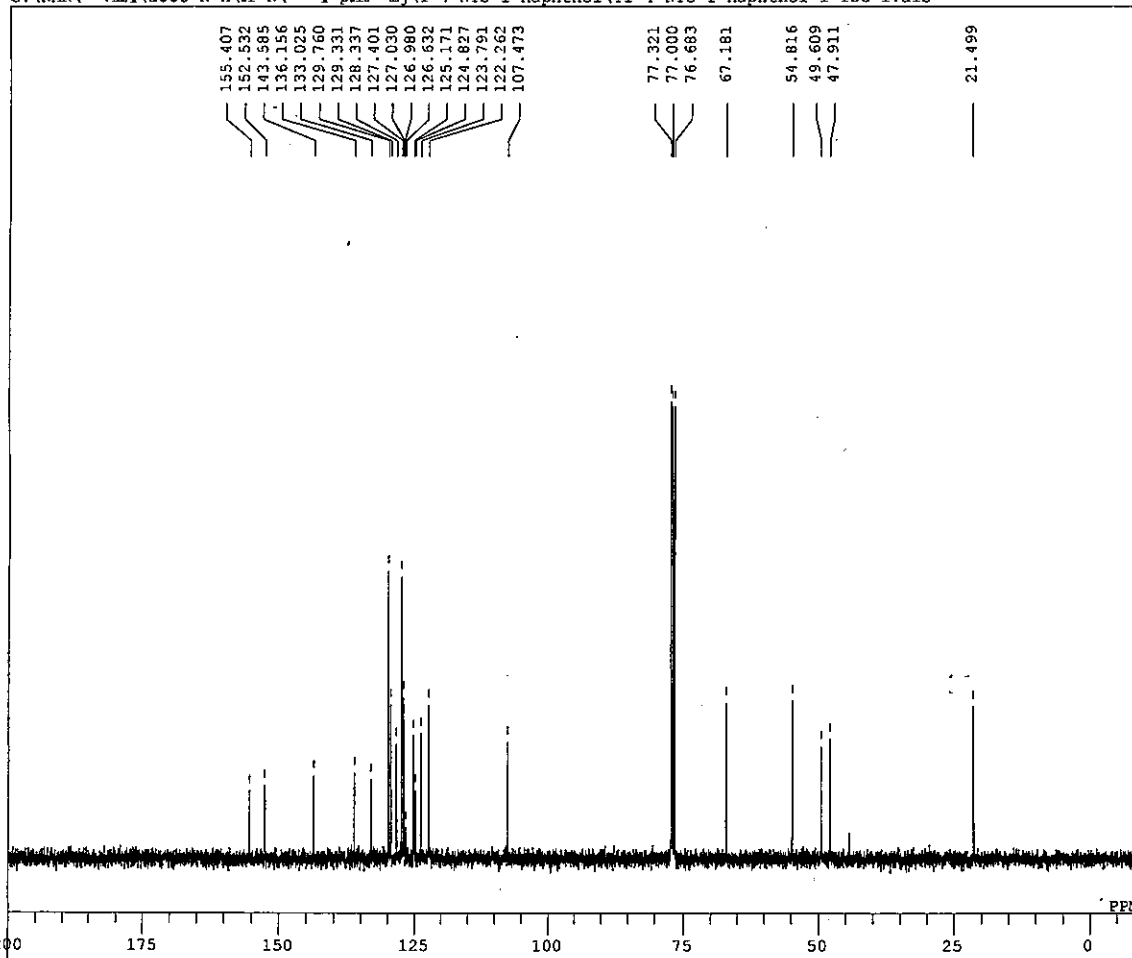

DFILE YI-4-NTs-1-naphthol-1-13C\_1  
COMNT YKYI-10-751-13C  
DATIM 24-MAR-2009 10:41:33  
OBNUC 13C  
EXMOD single\_pulse\_dec  
OBFRQ 100.00 MHz  
OBSET 536.00 KHz  
OBFIN 361.11 Hz  
POINT 65536  
FREQU 25188.92 Hz  
SCANS 95  
ACQTM 2.6018 sec  
PD 1.5000 sec  
PW1 3.50 usec  
IRNUC 1H  
CTEMP 23.2 c  
SLVNT CDCL3  
EXREF 77.00 ppm  
BF 1.20 Hz  
RGAIN 27

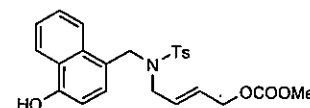

<sup>13</sup>C NMR: 3j

## YKYI-06-478-3

G:\NMR\2008\N\X\YI-S\1-p-0\YI-p-O-3-1H.als

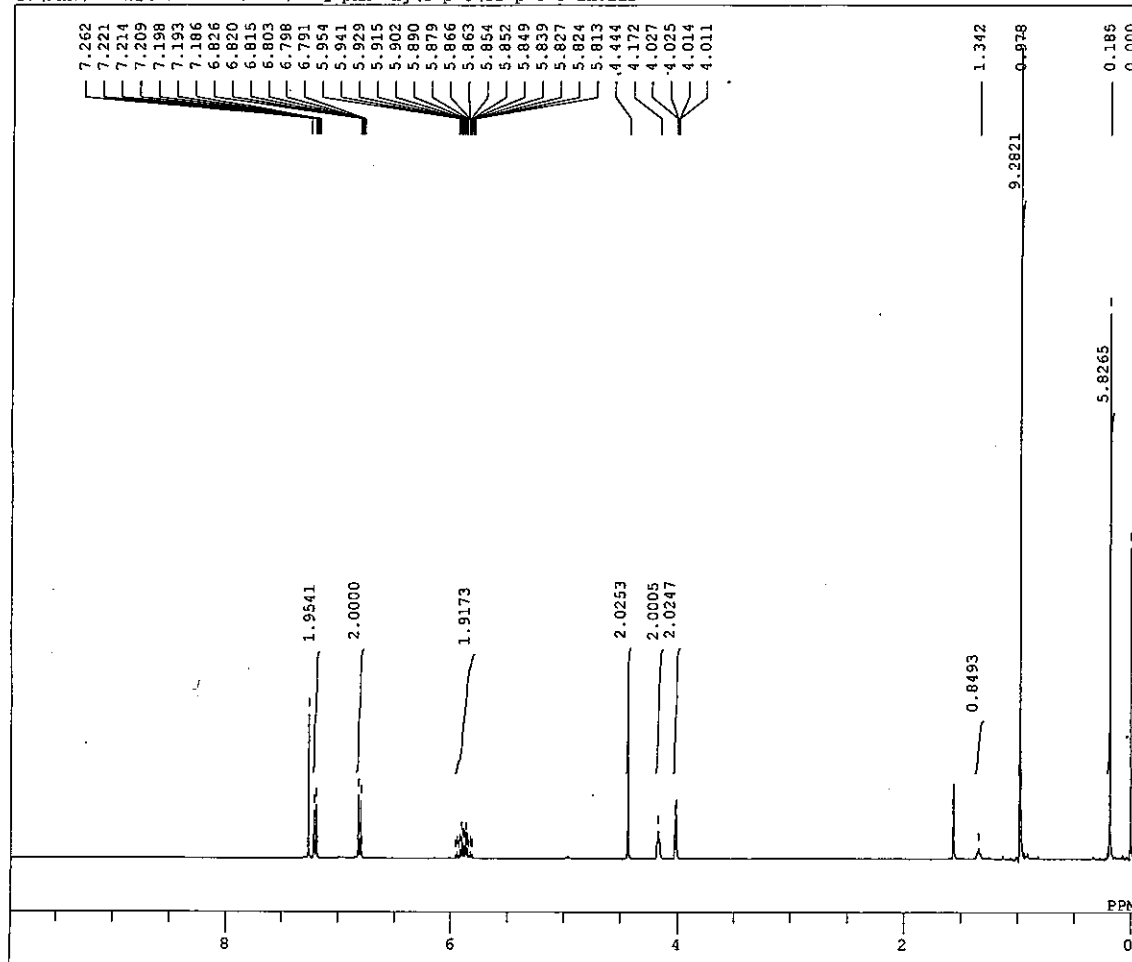

DFILE YI-p-O-3-1H.als  
 COMNT YKYI-06-478-3  
 DATIM 5-AUG-2008 14:07:02  
 OBNUC 1H  
 EXMOD single\_pulse.exp  
 OBFRQ 399.00 MHz  
 OBSET 784.00 KHz  
 OBFIN 597.07 Hz  
 POINT 32768  
 FREQU 5998.80 Hz  
 SCANS 8  
 ACQTM 5.4624 sec  
 PD 2.0000 sec  
 PW1 6.70 usec  
 IRNUC 1H  
 CTEMP 20.8 c  
 SLVNT CDCL3  
 EXREF 0.00 ppm  
 BF 0.12 Hz  
 RGAIN 22

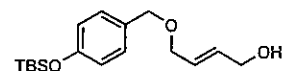<sup>1</sup>H-NMR: S-17

## YK-TN-26-100530-13C

G:\NMR\nemoto\26\YK-TN-26-100530-13C 1.als

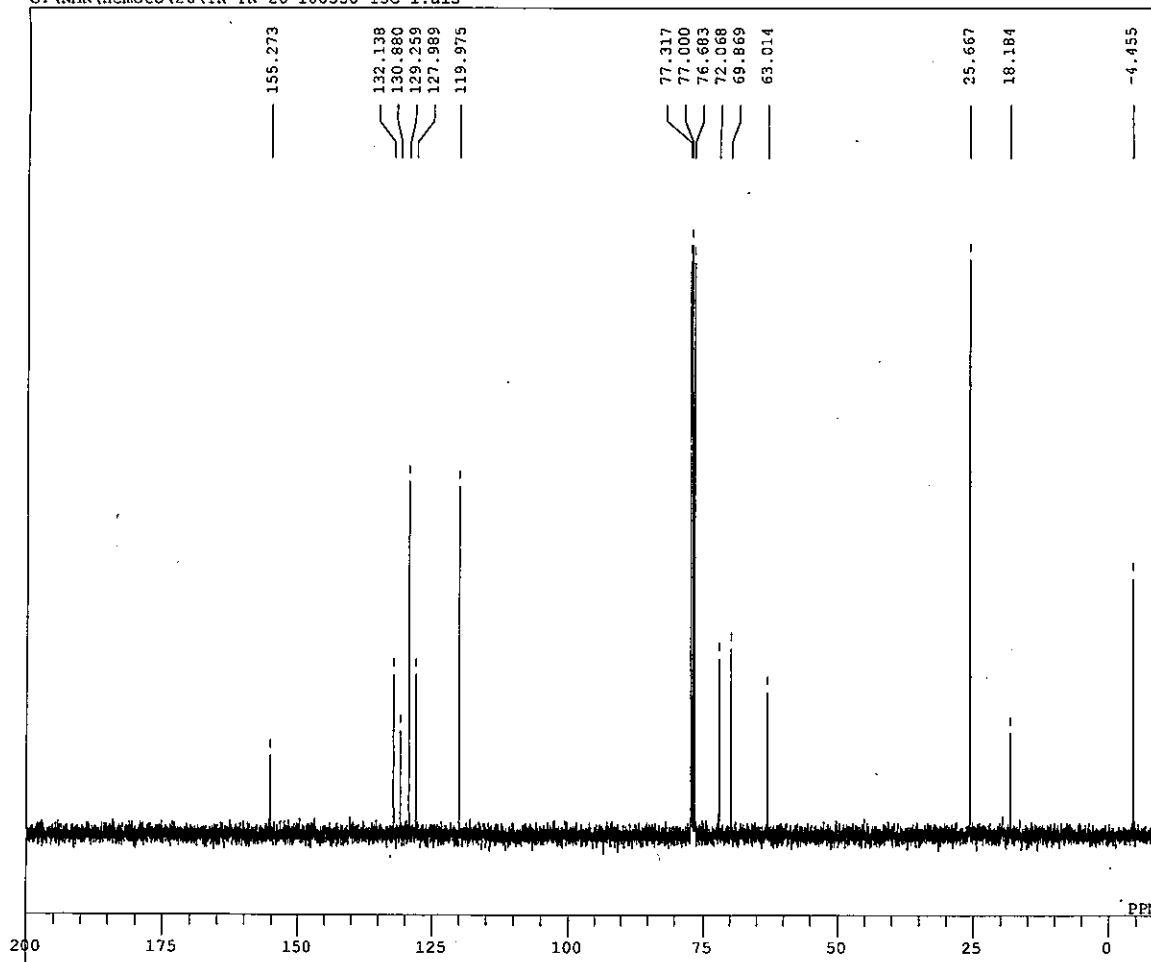

DFILE YK-TN-26-100530-13C 1.als  
 COMNT YK-TN-26-100530-13C  
 DATIM 31-MAY-2010 04:12:31  
 OBNUC 13C  
 EXMOD single\_pulse\_dec  
 OBFRQ 100.00 MHz  
 OBSET 536.00 KHz  
 OBFIN 361.11 Hz  
 POINT 65536  
 FREQU 25188.92 Hz  
 SCANS 69  
 ACQTM 2.6018 sec  
 PD 1.5000 sec  
 PW1 3.50 usec  
 IRNUC 13C  
 CTEMP 28.5 c  
 SLVNT CDCL3  
 EXREF 77.00 ppm  
 BF 1.20 Hz  
 RGAIN 25

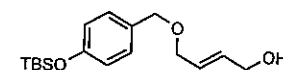<sup>13</sup>C NMR: S-17

## YKYI-07-486

G:\NMR\12&lt;81\2008"N"x\01-N\~ \*q-pd11~0j\C p-O\YI-p-O-2-1H.als

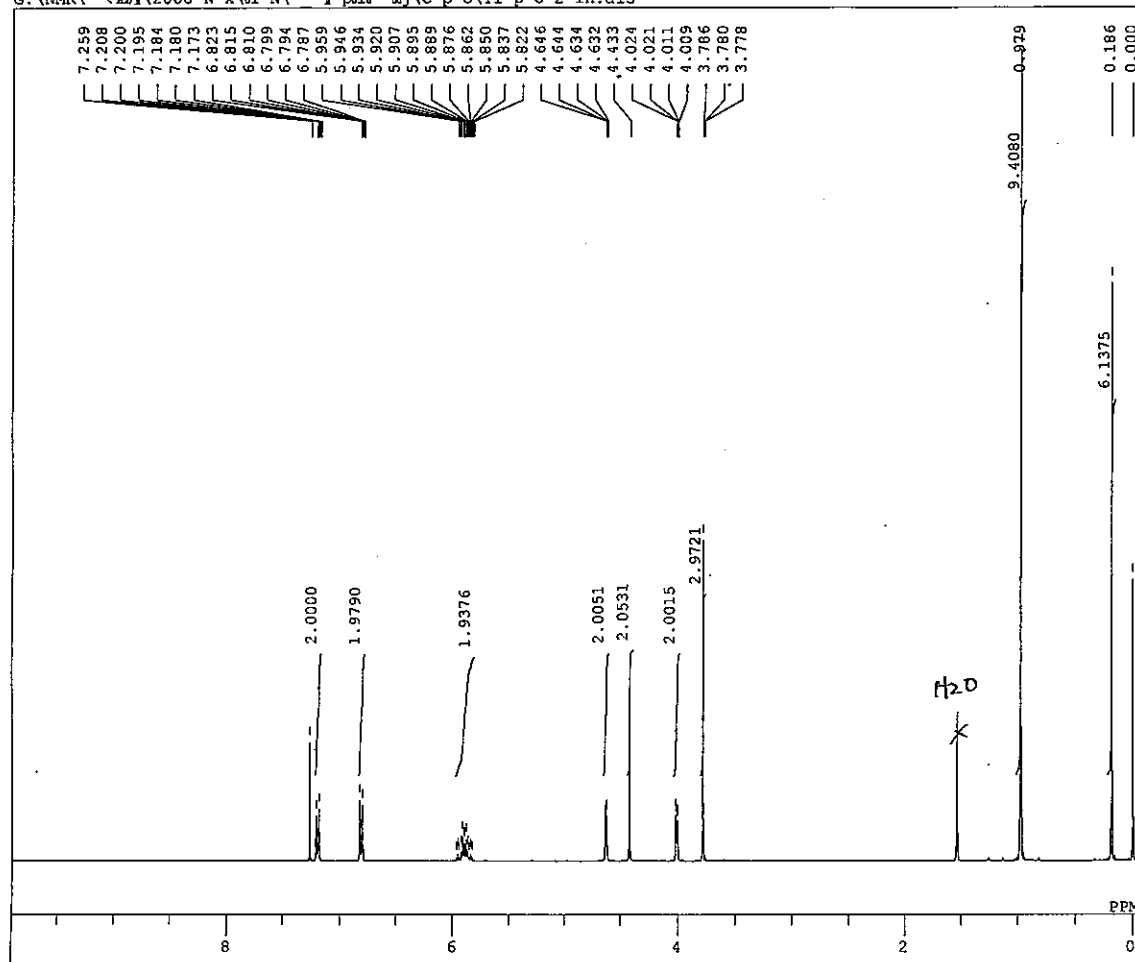

DFILE YI-p-O-2-1H.als  
 COMNT KYKI-07-486  
 DATIM 1H  
 OBNUC SINGL-NON  
 EXMOD 399.65 MHz  
 OBFRQ 130.00 KHz  
 OBSET 4500.00 Hz  
 OBFIN 32768  
 POINT 7993.60 Hz  
 FREQU 8  
 SCANS 4.0993 sec  
 ACQTM 2.5000 sec  
 PD 4.00 usec  
 PW1 1H  
 IRNUC 28.4 c  
 CTEMP CDCL3  
 SLVNT 0.00 ppm  
 EXREF 0.12 Hz  
 BF 23  
 RGAIN

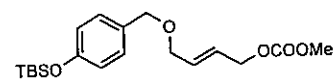<sup>1</sup>H-NMR: S-18

## YKYI-07-486-13C

G:\NMR\12&lt;81\2008"N"x\01-N\~ \*q-pd11~0j\C p-O\YI-p-O-2-13C.als

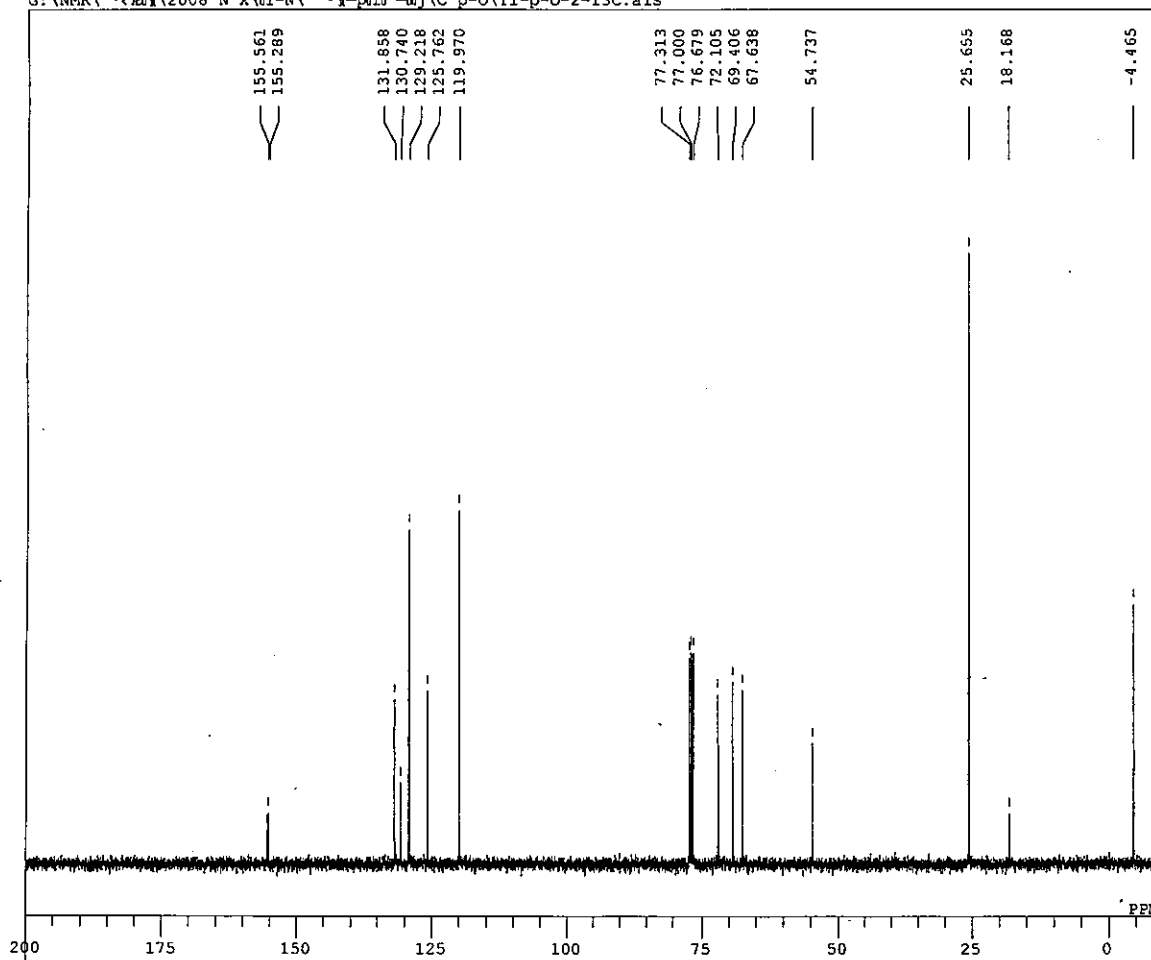

DFILE YI-p-O-2-13C.als  
 COMNT KYKI-07-486-13C  
 DATIM 13C  
 OBNUC SINGL-BCM  
 EXMOD 100.40 MHz  
 OBFRQ 130.00 KHz  
 OBSET 5500.00 Hz  
 OBFIN 32768  
 POINT 27100.27 Hz  
 FREQU 65  
 SCANS 1.2091 sec  
 ACQTM 2.0000 sec  
 PD 4.90 usec  
 PW1 1H  
 IRNUC 29.0 c  
 CTEMP CDCL3  
 SLVNT 77.00 ppm  
 EXREF 1.20 Hz  
 BF 23  
 RGAIN

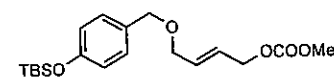<sup>13</sup>C NMR: S-18



# YKYI-p-O-1-1H

G:\NMR\12<EY\2008"N"x\01-N\~ .q-pli0~0j\C p-O\YI-p-O-1-1H 1.als

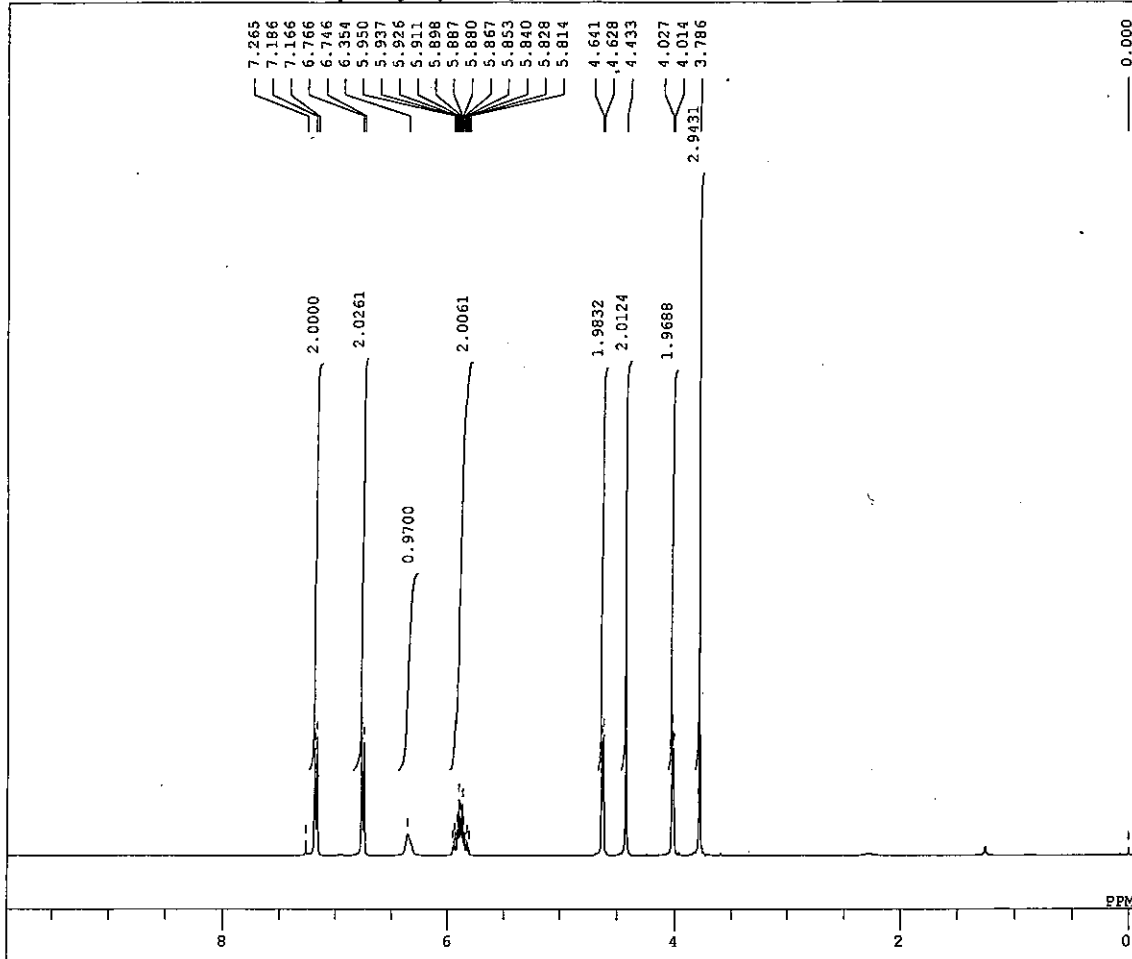

DFILE YI-p-O-1-1H 1.als  
COMNT KYKI-p-O-1-1H  
DATIM 5-MAR-2009 16:13:07  
OBNUC 1H  
EXMOD single\_pulse.exp  
OBFRQ 399.00 MHz  
OBSET 784.00 KHz  
OBFIN 597.07 Hz  
POINT 32768  
FREQU 5998.80 Hz  
SCANS 8  
ACQTM 5.4624 sec  
PD 2.0000 sec  
PWL 6.70 usec  
IRNUC 1H  
CTEMP 18.2 c  
SLVNT CDCL3  
EXREF 0.00 ppm  
BF 0.12 Hz  
RGAIN 9

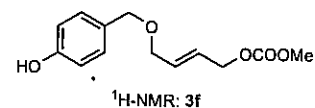

# YKYI-p-O-1-13C

G:\NMR\12<EY\2008"N"x\01-N\~ .q-pli0~0j\C p-O\YI-p-O-1-13C 1.als

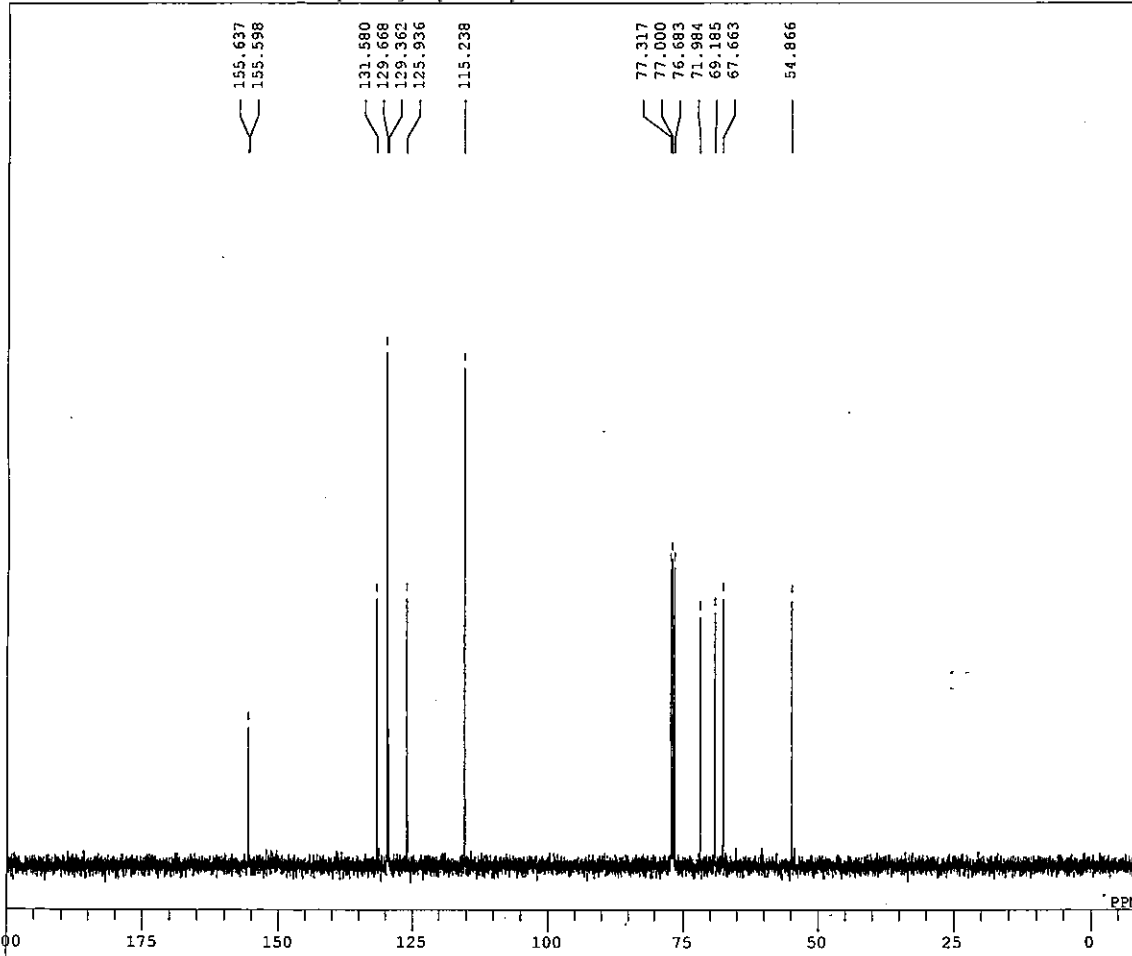

DFILE YI-p-O-1-13C 1.als  
COMNT KYKI-p-O-1-13C  
DATIM 5-MAR-2009 16:16:21  
OBNUC 13C  
EXMOD single\_pulse\_dec  
OBFRQ 100.00 MHz  
OBSET 536.00 KHz  
OBFIN 361.11 Hz  
POINT 65536  
FREQU 25188.92 Hz  
SCANS 19  
ACQTM 2.6018 sec  
PD 1.5000 sec  
PWL 3.50 usec  
IRNUC 1H  
CTEMP 18.7 c  
SLVNT CDCL3  
EXREF 77.00 ppm  
BF 1.20 Hz  
RGAIN 25

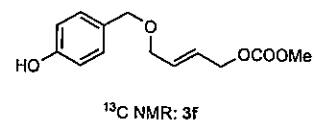

ykyk-data-f2-1h

G:\NMR\%i-1\ykyk-data-f2-1h 1.als

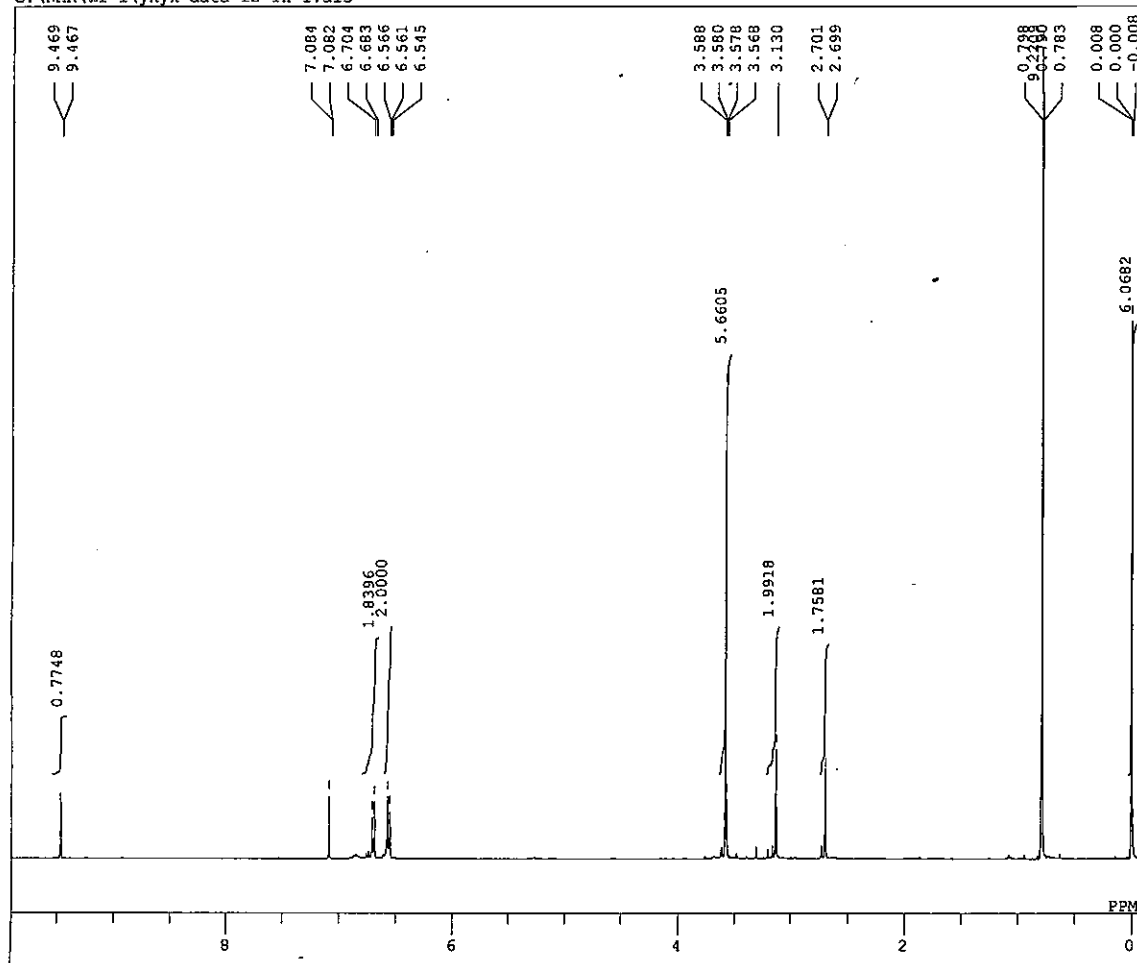

DFILE ykyk-data-f2-1h 1.als  
COMNT ykyk-data-f2-1h  
DATIM 20-MAR-2010 03:19:08  
OBNUC 1H  
EXMOD single\_pulse.exp  
OBFRQ 399.00 MHz  
OBSET 784.00 KHz  
OBFIN 597.07 Hz  
POINT 32768  
FREQU 5998.80 Hz  
SCANS 16  
ACQTM 5.4624 sec  
PD 2.0000 sec  
FWI 6.85 usec  
IRNUC 1H  
CTEMP 25.0 c  
SLVNT CDCL3  
EXREF 0.00 ppm  
BF 0.12 Hz  
RGAIN 13

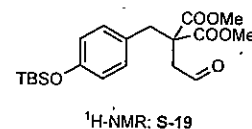

ykyk05-f2-13c

G:\NMR\%i-1\ykyk05-f2-13c 1.als

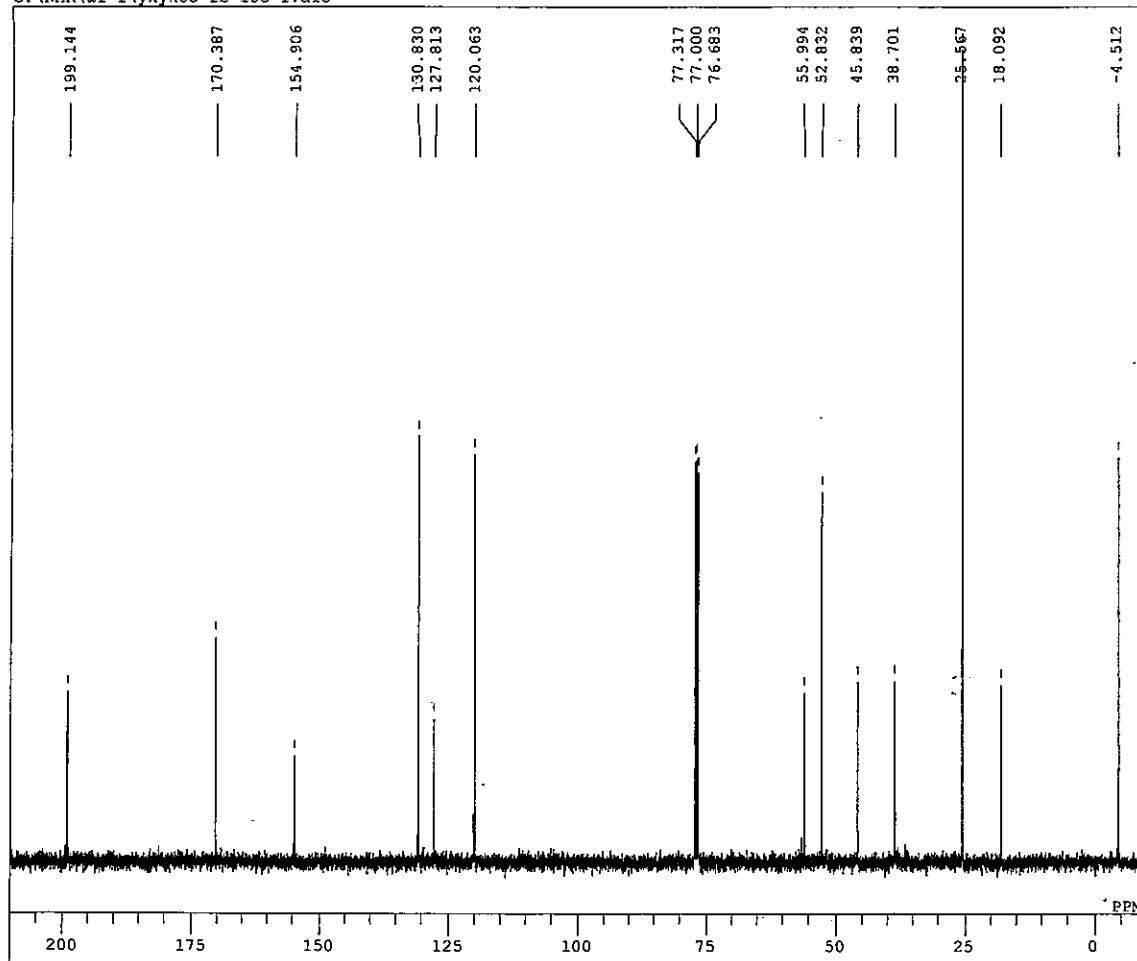

DFILE ykyk05-f2-13c 1.als  
COMNT ykyk05-f2-13c  
DATIM 30-MAR-2010 05:01:10  
OBNUC 13C  
EXMOD single\_pulse\_dec  
OBFRQ 100.00 MHz  
OBSET 536.00 KHz  
OBFIN 361.11 Hz  
POINT 65536  
FREQU 25188.92 Hz  
SCANS 44  
ACQTM 2.6018 sec  
PD 1.5000 sec  
FWI 3.50 usec  
IRNUC 1H  
CTEMP 21.5 c  
SLVNT CDCL3  
EXREF 77.00 ppm  
BF 1.20 Hz  
RGAIN 24

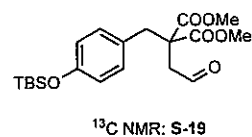

# YK-TN-27-methylketone-1H

G:\NMR\nemoto\DATA-IPSO-FC\YK-TN-27-methylketone-1H 1.als

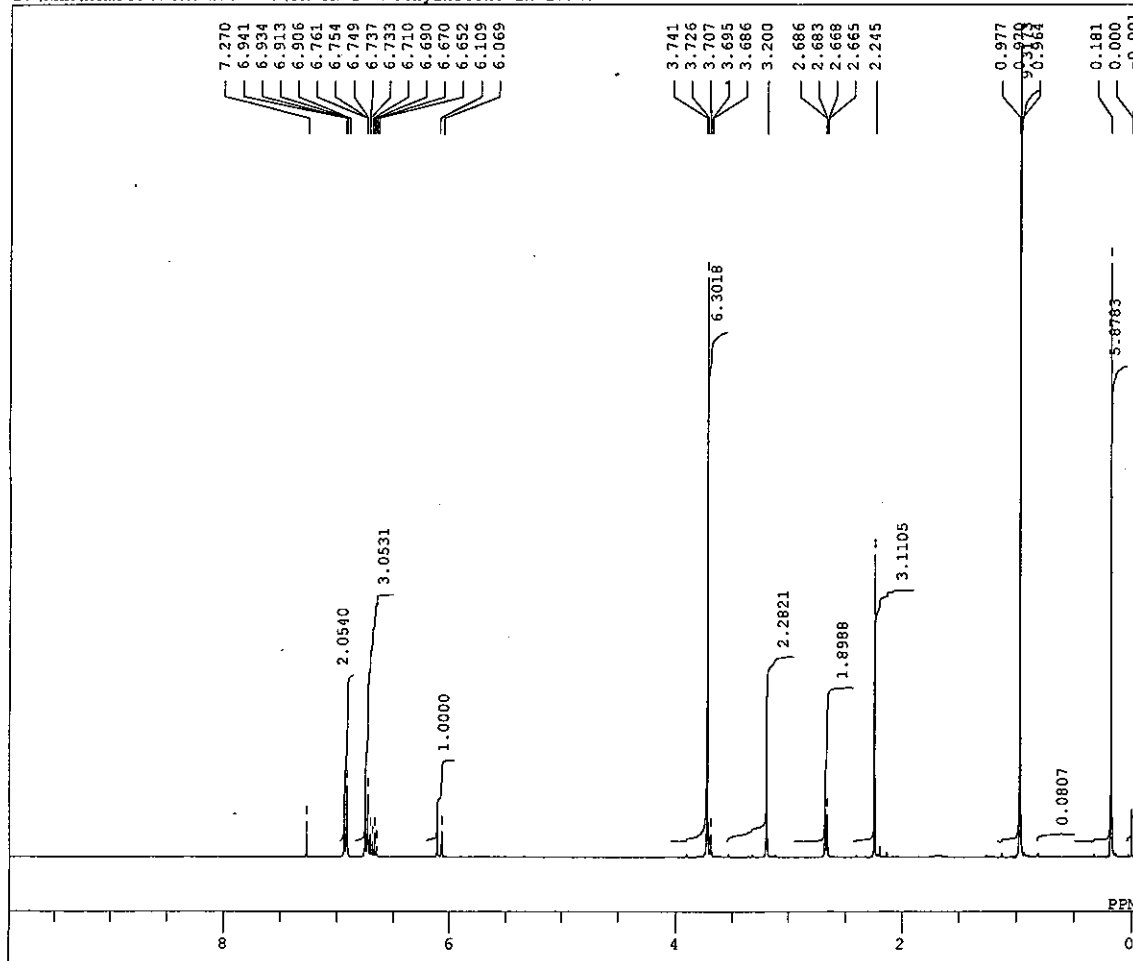

DFILE YK-TN-27-methylketone-1H 1.als  
COMNT YK-TN-27-methylketone-1H  
DATIM 15-JUN-2010 22:40:38  
OBNUC 1H  
EXMOD single\_pulse.exp  
OBFRQ 399.00 MHz  
OBSET 784.00 KHz  
OBFIN 597.07 Hz  
POINT 32768  
FREQU 5998.80 Hz  
SCANS 16  
ACQTM 5.4624 sec  
PD 2.0000 sec  
PWL 6.85 usec  
IRNUC 1H  
CTEMP 21.4 c  
SLVNT CDCL3  
EXREF 0.00 ppm  
BF 0.12 Hz  
RGAIN 11

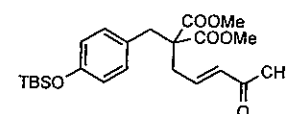

<sup>1</sup>H-NMR: S-20

## ykyk05-f3-13c

G:\NMR\bi-1\ykyk05-f3-13c 1.als

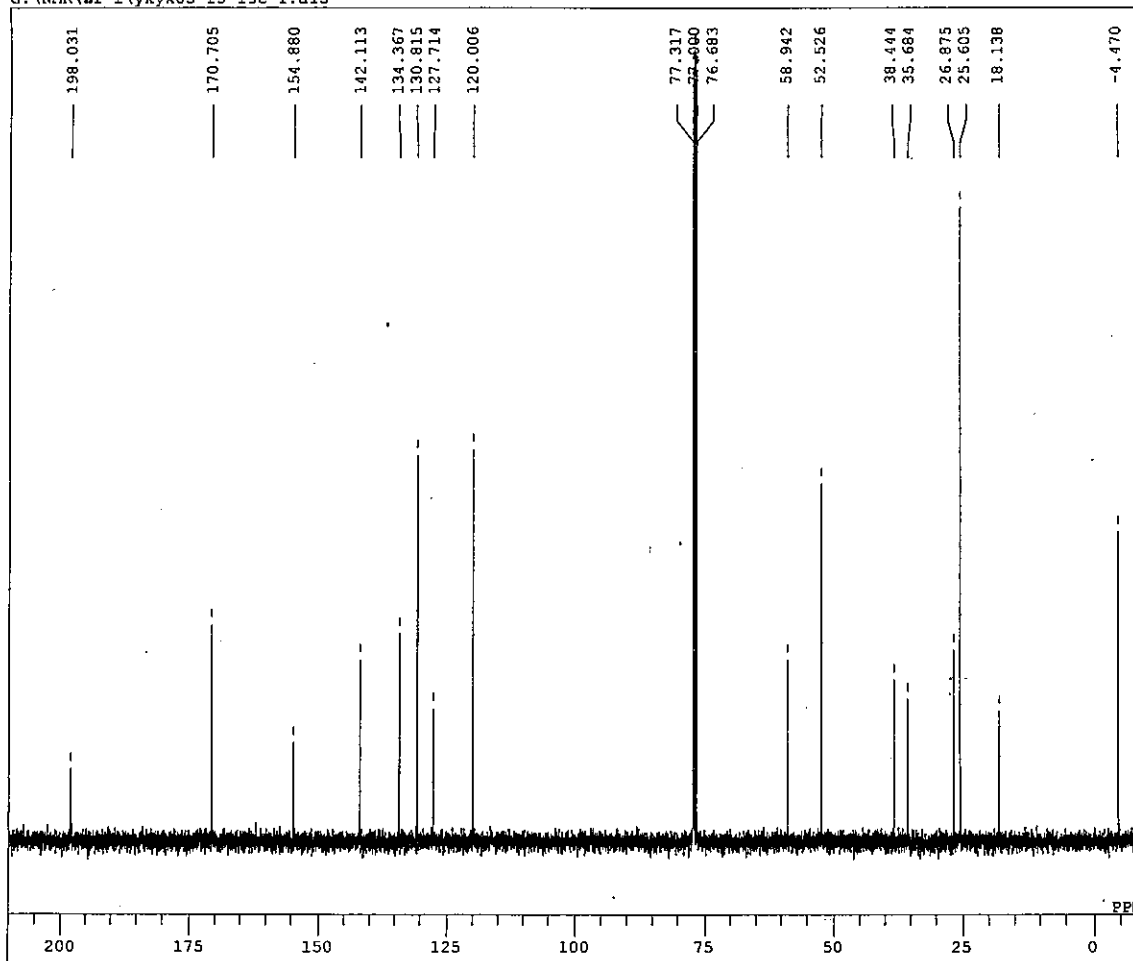

DFILE ykyk05-f3-13c 1.als  
COMNT ykyk05-f3-13c  
DATIM 30-MAR-2010 05:13:44  
OBNUC 13C  
EXMOD single\_pulse\_dec  
OBFRQ 100.00 MHz  
OBSET 536.00 KHz  
OBFIN 361.11 Hz  
POINT 65536  
FREQU 25188.92 Hz  
SCANS 137  
ACQTM 2.6018 sec  
PD 1.5000 sec  
PWL 3.50 usec  
IRNUC 1H  
CTEMP 21.6 c  
SLVNT CDCL3  
EXREF 77.00 ppm  
BF 1.20 Hz  
RGAIN 23

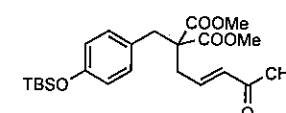

<sup>13</sup>C NMR: S-20

ykyk-data-f4-1h

G:\NMR\h1\ykyk-data-f4-1h 1.als

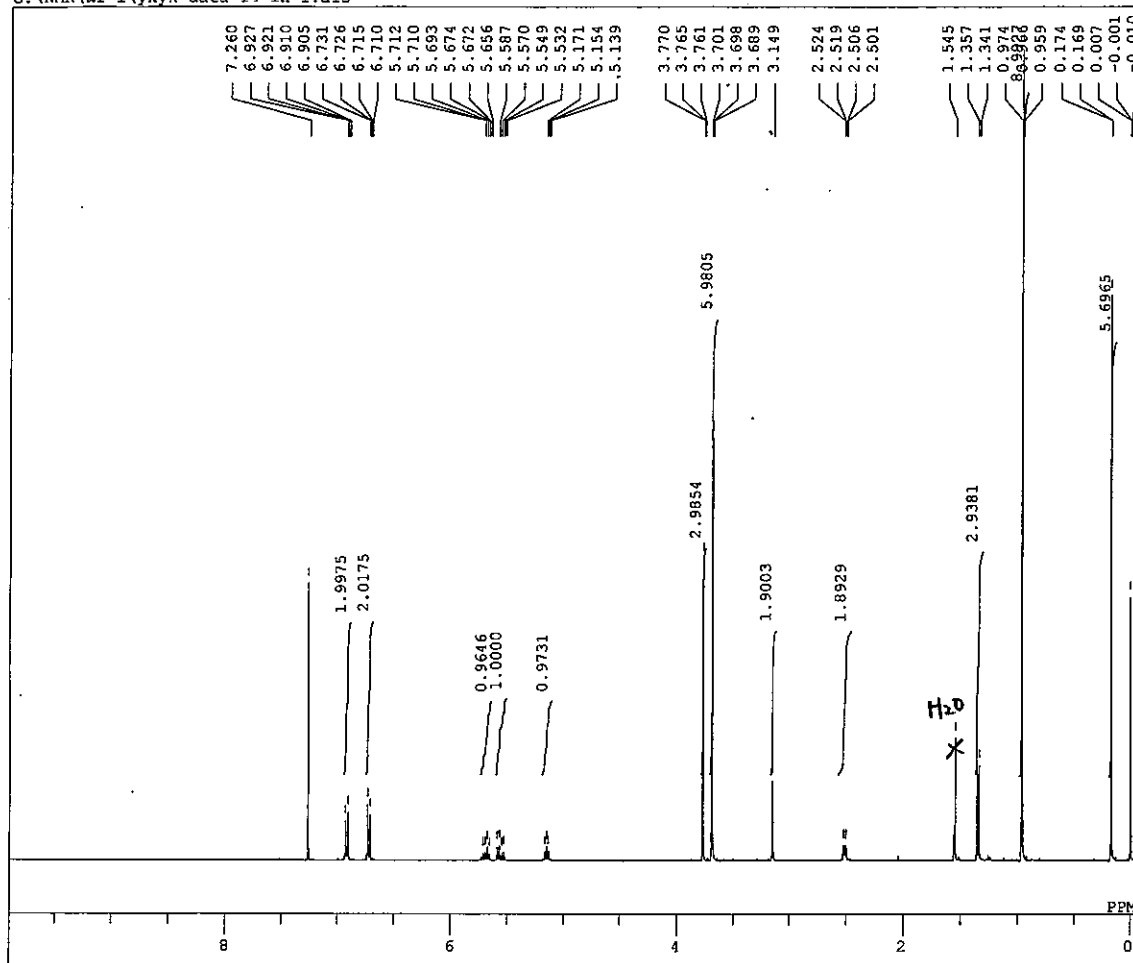

DFILE ykyk-data-f4-1h 1.als  
COMNT ykyk-data-f4-1h  
DATIM 20-MAR-2010 03:31:24  
OBNUC 1H  
EXMOD single pulse.exp  
OBFRQ 399.00 MHz  
OBSET 784.00 KHz  
OBFIN 597.07 Hz  
POINT 32768  
FREQU 5998.80 Hz  
SCANS 16  
ACQTM 5.4624 sec  
PD 2.0000 sec  
PWL 6.85 usec  
IRNUC 1H  
CTEMP 25.0 c  
SLVNT CDCL3  
EXREF 7.26 ppm  
BF 0.12 Hz  
RGAIN 17

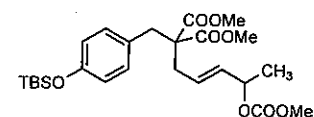

<sup>1</sup>H-NMR: S-21

ykyk05-f4-13c

G:\NMR\h1\ykyk05-f4-13c 1.als

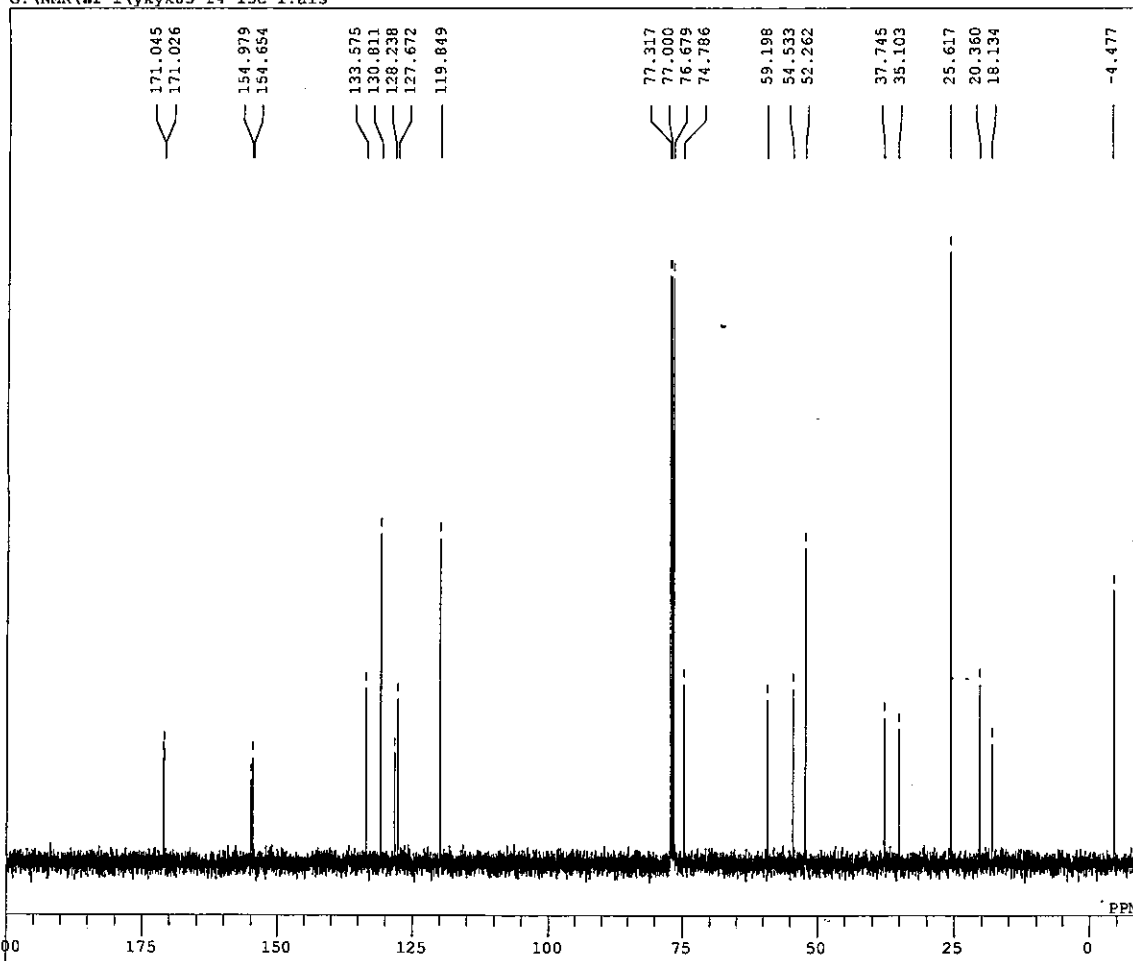

DFILE ykyk05-f4-13c 1.als  
COMNT ykyk05-f4-13c  
DATIM 30-MAR-2010 05:20:36  
OBNUC 13C  
EXMOD single pulse dec  
OBFRQ 100.00 MHz  
OBSET 536.00 KHz  
OBFIN 361.11 Hz  
POINT 65536  
FREQU 25188.92 Hz  
SCANS 53  
ACQTM 2.6018 sec  
PD 1.5000 sec  
PWL 3.50 usec  
IRNUC 1H  
CTEMP 21.5 c  
SLVNT CDCL3  
EXREF 77.00 ppm  
BF 1.20 Hz  
RGAIN 24

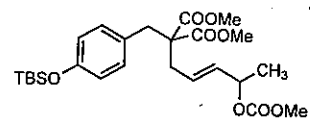

<sup>13</sup>C NMR: S-21

## YK-TN-27-sec-Me-SM-1H

G:\NMR\nemoto\27\YK-TN-27-sec-Me-SM-1H 1.als

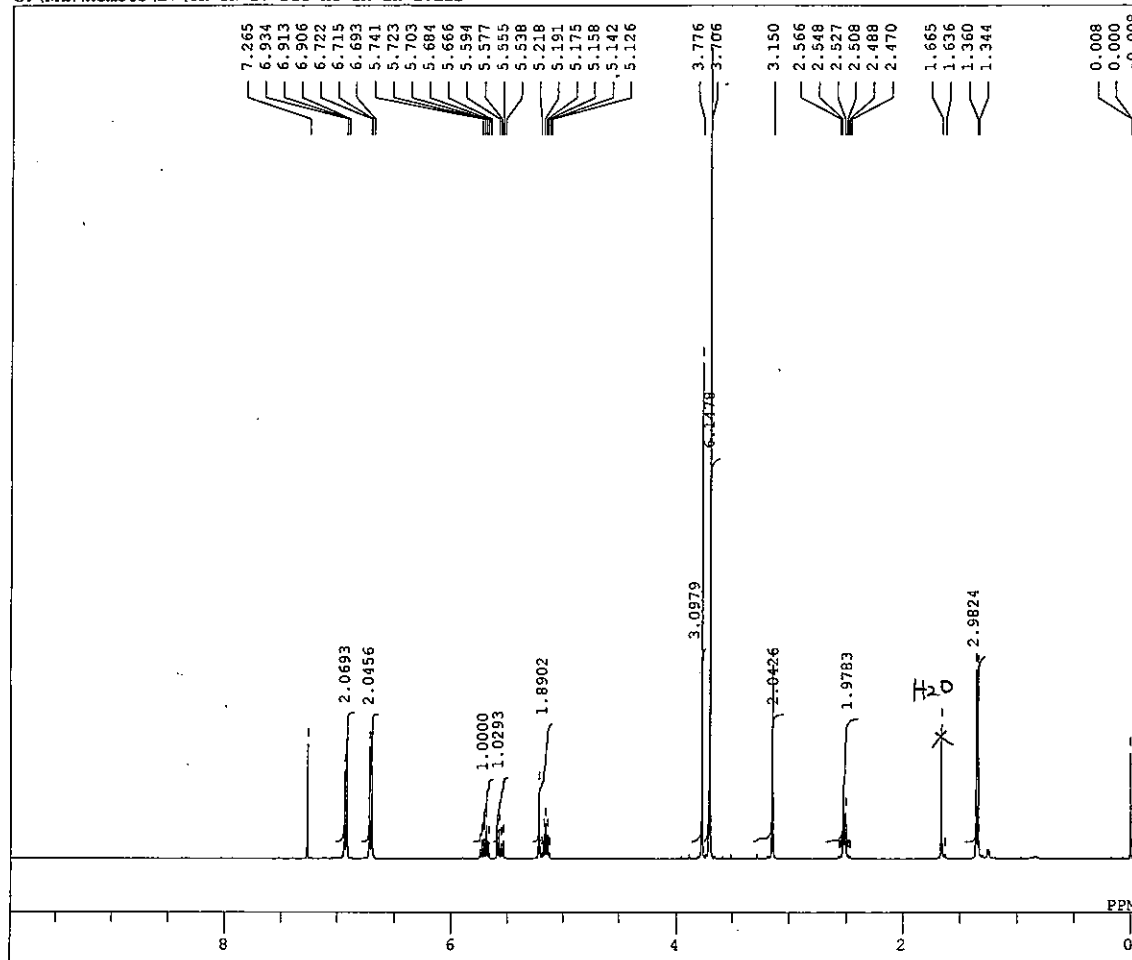

DFILE YK-TN-27-sec-Me-SM-1H 1.als  
 COMNT YK-TN-27-sec-Me-SM-1H  
 DATIM 15-JUN-2010 22:34:53  
 OBNUC 1H  
 EXMOD single\_pulse.exp  
 OBFRQ 399.00 MHz  
 OBSET 784.00 KHz  
 OBFIN 597.07 Hz  
 POINT 32768  
 FREQU 5998.80 Hz  
 SCANS 16  
 ACQTM 5.4624 sec  
 PD 2.0000 sec  
 PW1 6.85 usec  
 IRNUC 1H  
 CTEMP 21.7 c  
 SLVNT CDCL3  
 EXREF 0.00 ppm  
 BF 0.12 Hz  
 RGAIN 14

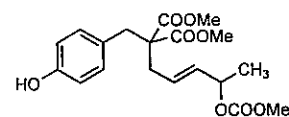<sup>1</sup>H-NMR: 3b

## ykyk05-f5-13c2

G:\NMR\kf-i\ykyk05-f5-13c2 1.als

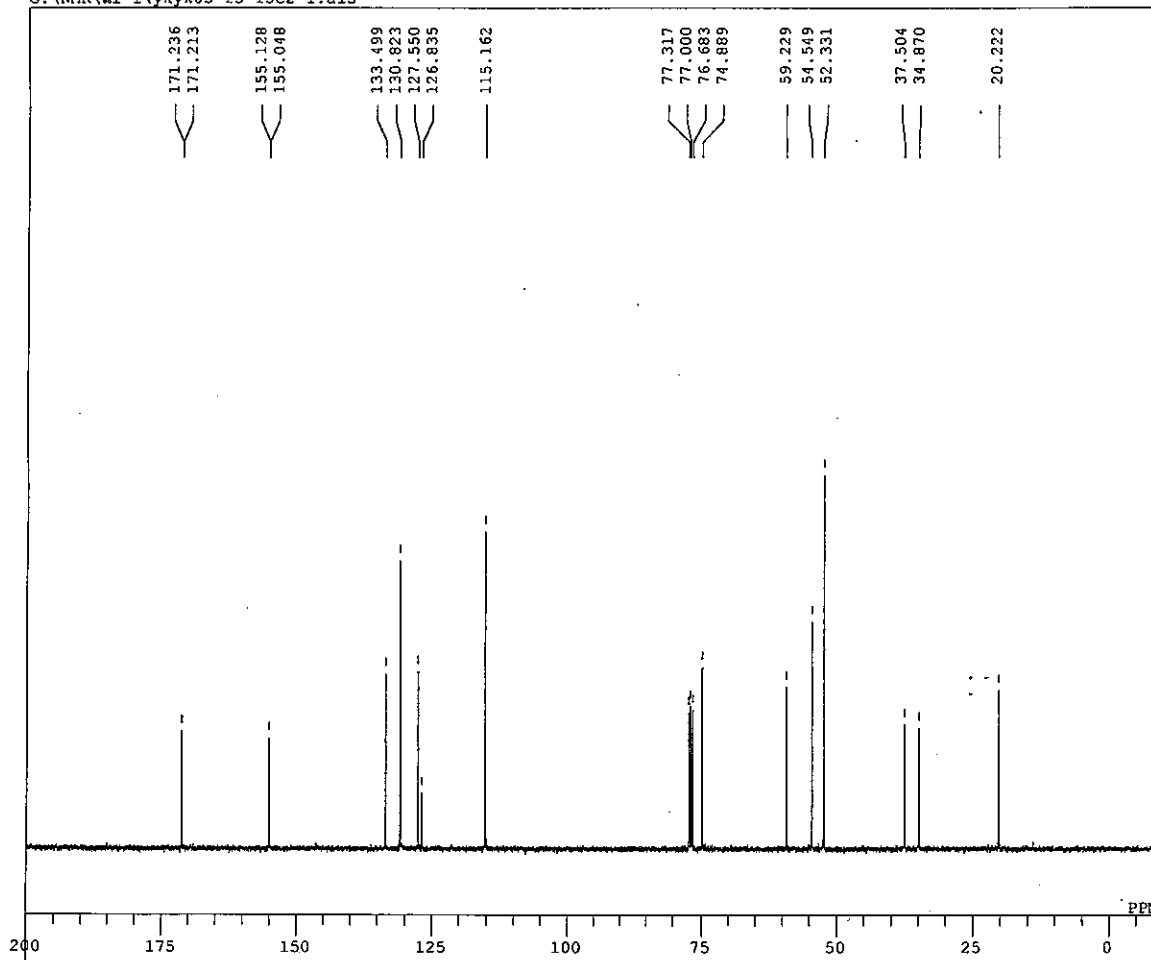

DFILE ykyk05-f5-13c2 1.als  
 COMNT ykyk05-f5-13c2  
 DATIM 31-MAR-2010 21:31:12  
 OBNUC 13C  
 EXMOD single\_pulse\_dec  
 OBFRQ 100.00 MHz  
 OBSET 536.00 KHz  
 OBFIN 361.11 Hz  
 POINT 65536  
 FREQU 25188.92 Hz  
 SCANS 119  
 ACQTM 2.6018 sec  
 PD 1.5000 sec  
 PW1 3.50 usec  
 IRNUC 1H  
 CTEMP 22.2 c  
 SLVNT CDCL3  
 EXREF 77.00 ppm  
 BF 1.20 Hz  
 RGAIN 24

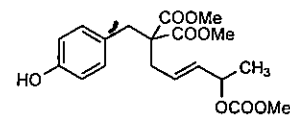<sup>13</sup>C-NMR: 3b

## YK-TN-27-05-SM-1H

G:\NMR\nemoto\27\YK-TN-27-05-SM-1H 1.als

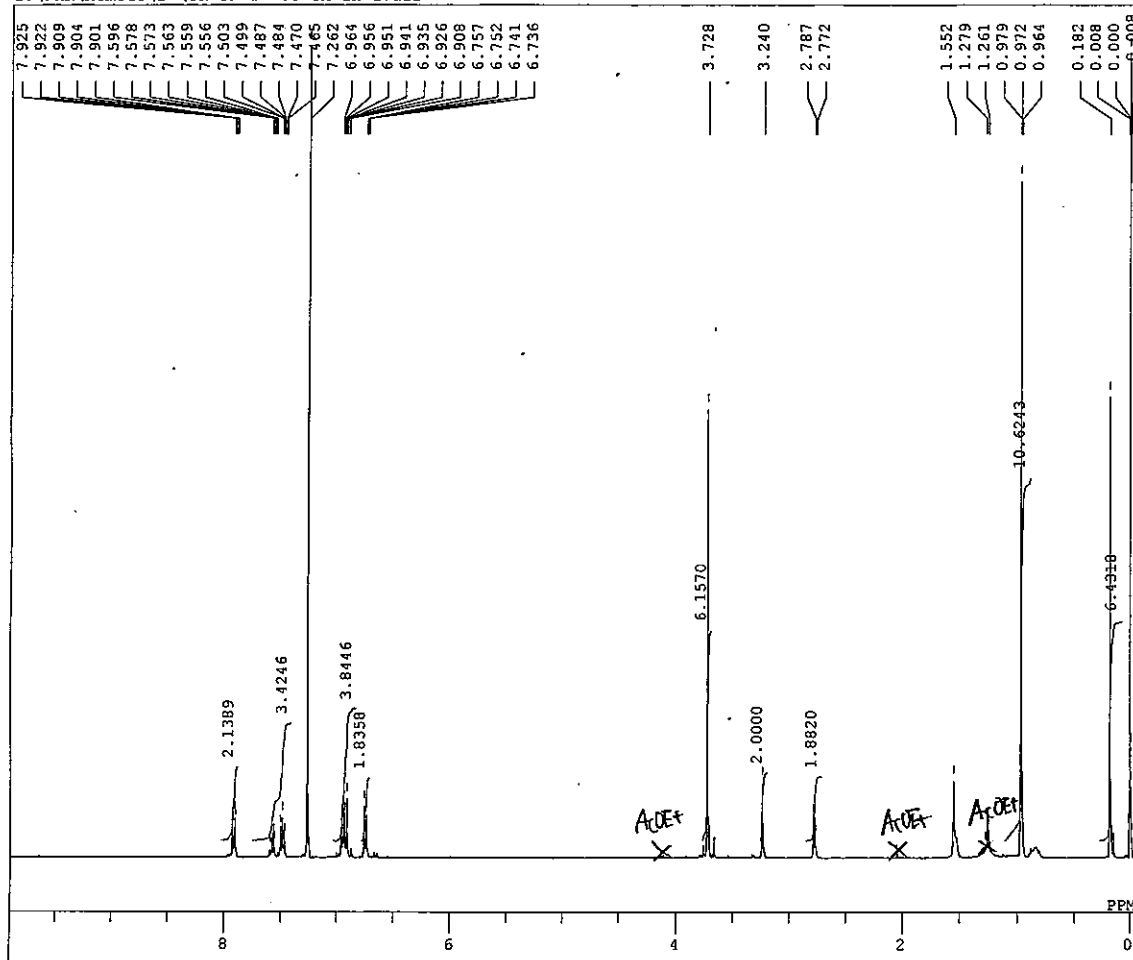

DFILE YK-TN-27-05-SM-1H 1.als  
 COMNT YK-TN-27-05-SM-1H  
 DATIM 15-JUN-2010 00:34:06  
 OBNUC 1H  
 EXMOD single\_pulse.exp  
 OBFRQ 399.00 MHz  
 OBSET 784.00 KHz  
 OBFIN 597.07 Hz  
 POINT 32768  
 FREQU 5998.80 Hz  
 SCANS 16  
 ACQTM 5.4624 sec  
 PD 2.0000 sec  
 PW1 6.85 usec  
 IRNUC 1H  
 CTEMP 21.7 c  
 SLVNT CDCL3  
 EXREF 0.00 ppm  
 BF 0.12 Hz  
 RGAIN 20

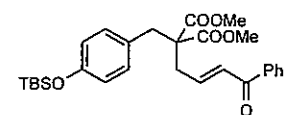<sup>1</sup>H-NMR: S-22

## YK-TN-27-05-SM-13C

G:\NMR\nemoto\27\YK-TN-27-05-SM-13C 1.als

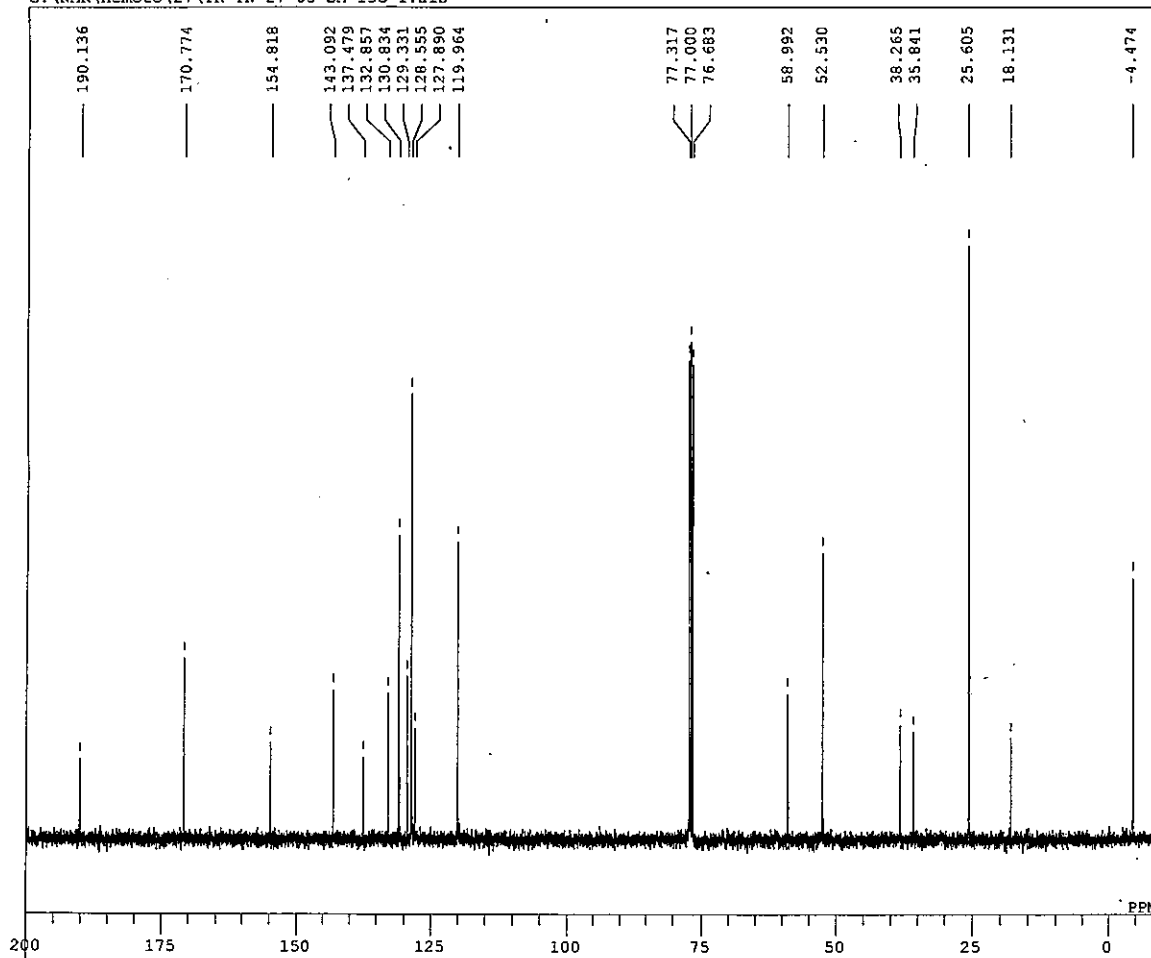

DFILE YK-TN-27-05-SM-13C 1.als  
 COMNT YK-TN-27-05-SM-13C  
 DATIM 15-JUN-2010 00:45:00  
 OBNUC 13C  
 EXMOD single\_pulse\_dec  
 OBFRQ 100.00 MHz  
 OBSET 536.00 KHz  
 OBFIN 361.11 Hz  
 POINT 65536  
 FREQU 25188.92 Hz  
 SCANS 93  
 ACQTM 2.6018 sec  
 PD 1.5000 sec  
 PW1 3.50 usec  
 IRNUC 1H  
 CTEMP 23.1 c  
 SLVNT CDCL3  
 EXREF 77.00 ppm  
 BF 1.20 Hz  
 RGAIN 23

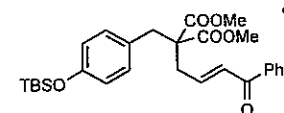<sup>13</sup>C NMR: S-22

ykyk05-e2-1h2

G:\NMR\af-i\ykyk05-e2-1h2 1.als

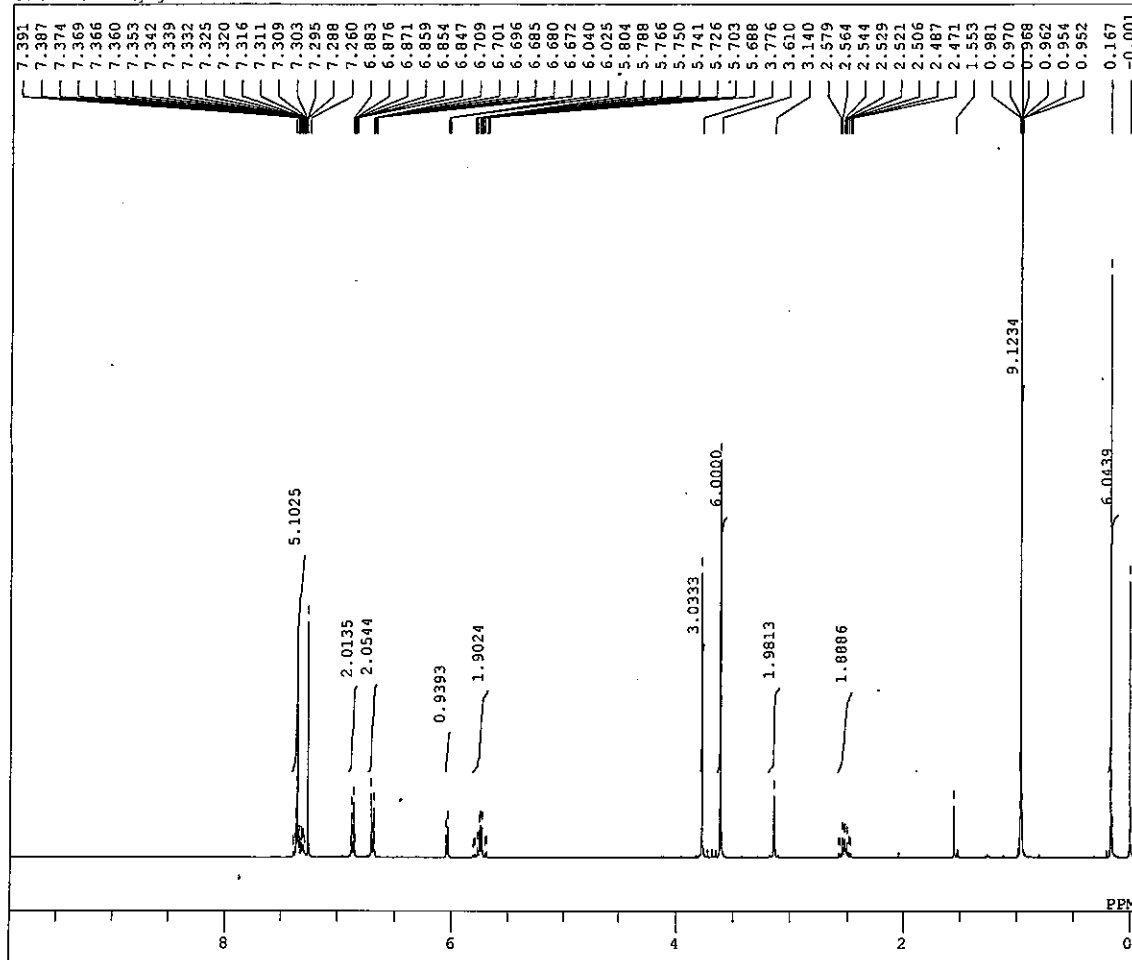

DFILE ykyk05-e2-1h2\_1.als  
 COMNT ykyk05-e2-1h2\_1  
 DATIM 31-MAR-2010 21:14:11  
 OBNUC 1H  
 EXMOD single\_pulse.exp  
 OBFRQ 399.00 MHz  
 OBSET 784.00 KHz  
 OBFIN 597.07 Hz  
 POINT 32768  
 FREQU 5998.80 Hz  
 SCANS 16  
 ACQTM 5.4624 sec  
 PD 2.0000 sec  
 PW1 6.85 usec  
 IRNUC 1H  
 CTEMP 21.3 c  
 SLVNT CDCL3  
 EXREF 7.26 ppm  
 BF 0.12 Hz  
 RGAIN 17

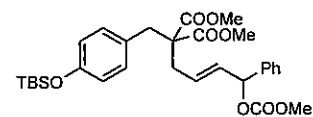<sup>1</sup>H-NMR: S-23

ykyk05-e2-13c2

G:\NMR\af-i\ykyk05-e2-13c2 1.als

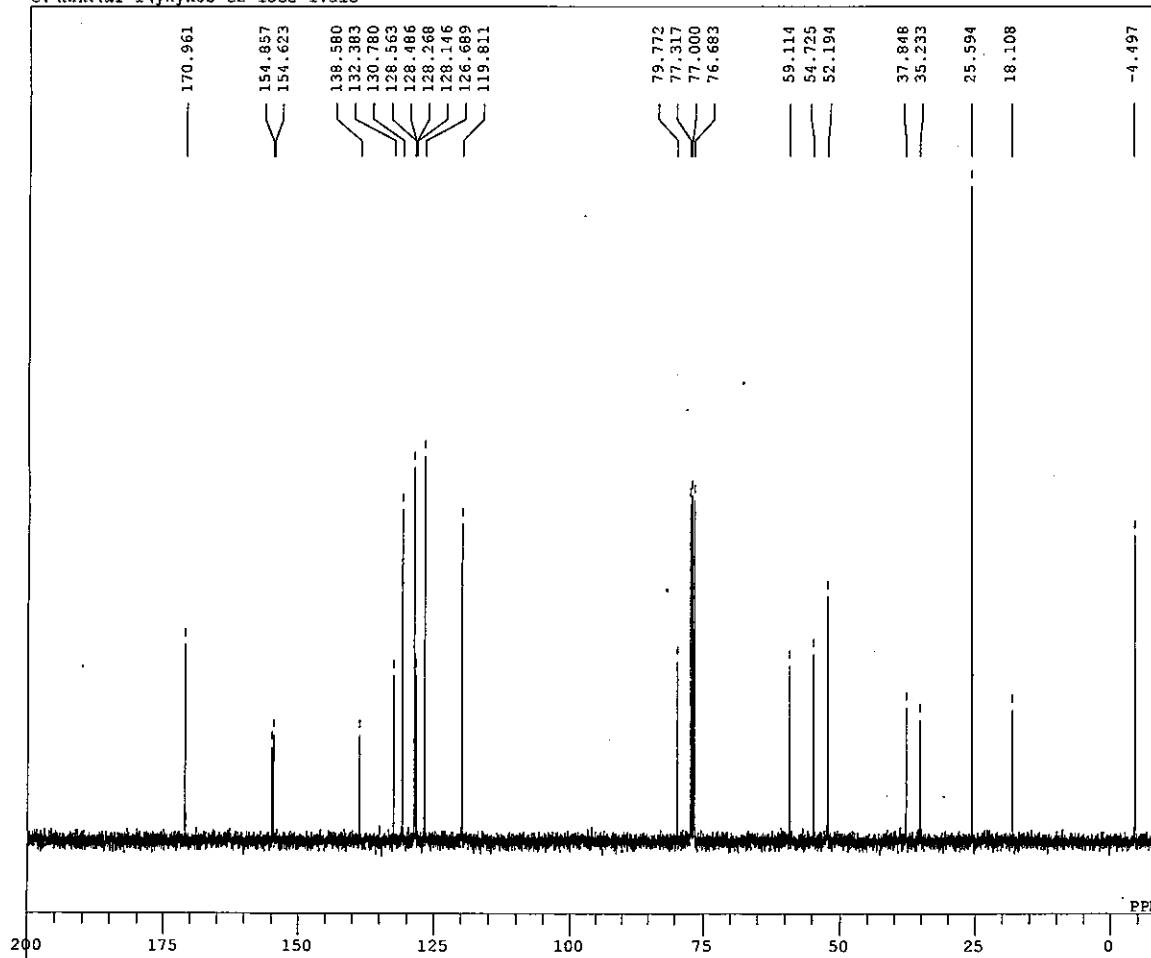

DFILE ykyk05-e2-13c2\_1.als  
 COMNT ykyk05-e2-13c2\_1  
 DATIM 31-MAR-2010 21:20:43  
 OBNUC 13C  
 EXMOD single\_pulse\_dec  
 OBFRQ 100.00 MHz  
 OBSET 536.00 KHz  
 OBFIN 361.11 Hz  
 POINT 65536  
 FREQU 25188.92 Hz  
 SCANS 52  
 ACQTM 2.6018 sec  
 PD 1.5000 sec  
 PW1 3.50 usec  
 IRNUC 13C  
 CTEMP 22.4 c  
 SLVNT CDCL3  
 EXREF 77.00 ppm  
 BF 1.20 Hz  
 RGAIN 24

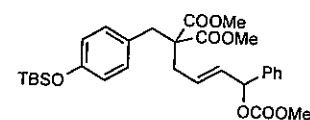<sup>13</sup>C NMR: S-23

ykyk05-343c-1h2

6: ANMRA 1-1-ykyk05-343c-1h2\_1.als

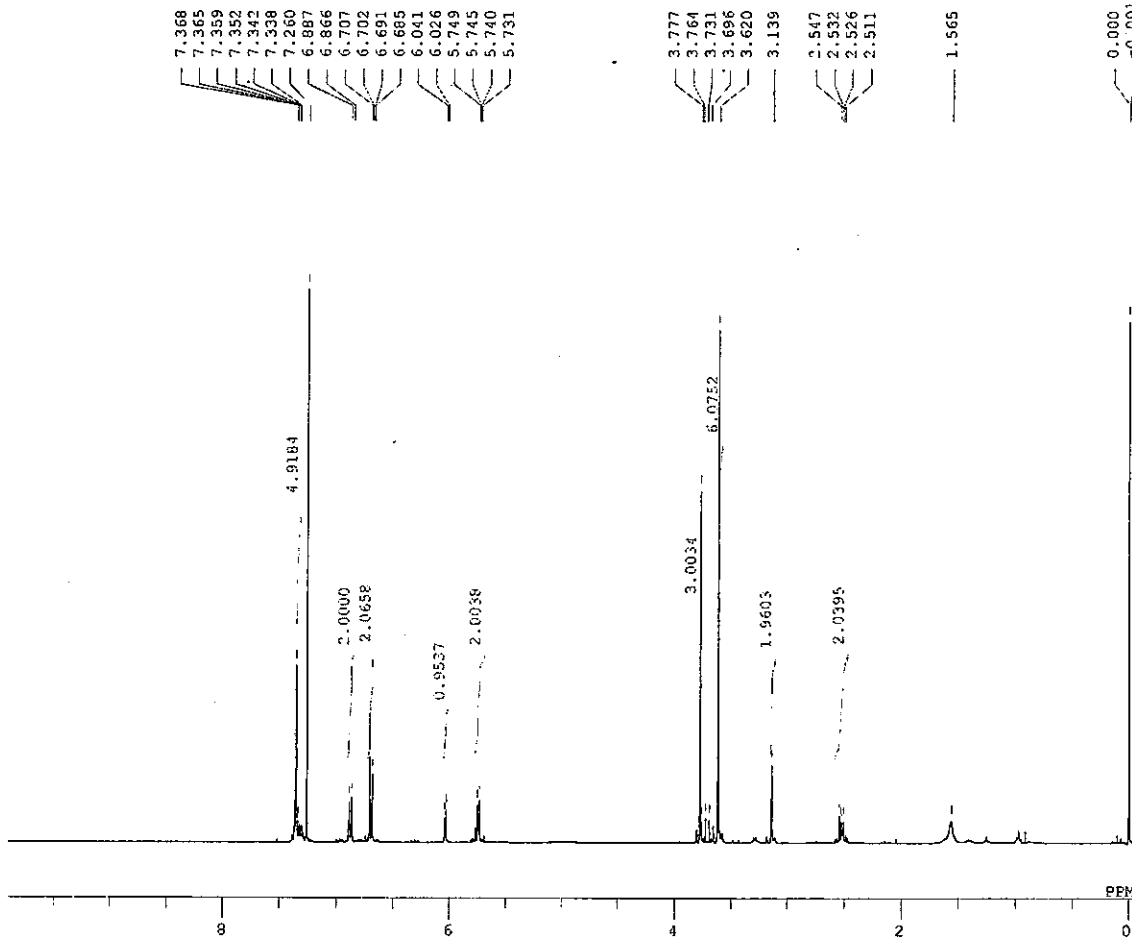

DFILE ykyk05-343c-1h2\_1.als  
COMNT ykyk05-343c-1h2  
DATIM 14-JUL-2010 20:01:20  
OBNUC 1H  
EXMOD single\_pulse.exp  
OBFRQ 399.00 MHz  
OBSET 784.00 KHz  
OBFIN 597.07 Hz  
POINT 32768  
FREQU 5998.80 Hz  
SCANS 16  
ACQTM 5.4624 sec  
PD 2.0000 sec  
PW1 6.85 usec  
IRNUC 1H  
CTEMP 22.8 c  
SLVNT CDCL3  
EXREF 7.26 ppm  
BF 0.12 Hz  
RGAIN 19

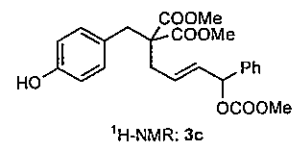

ykyk05-343-13c3

6: ANMRA 1-1-ykyk05-343-13c3\_1.als

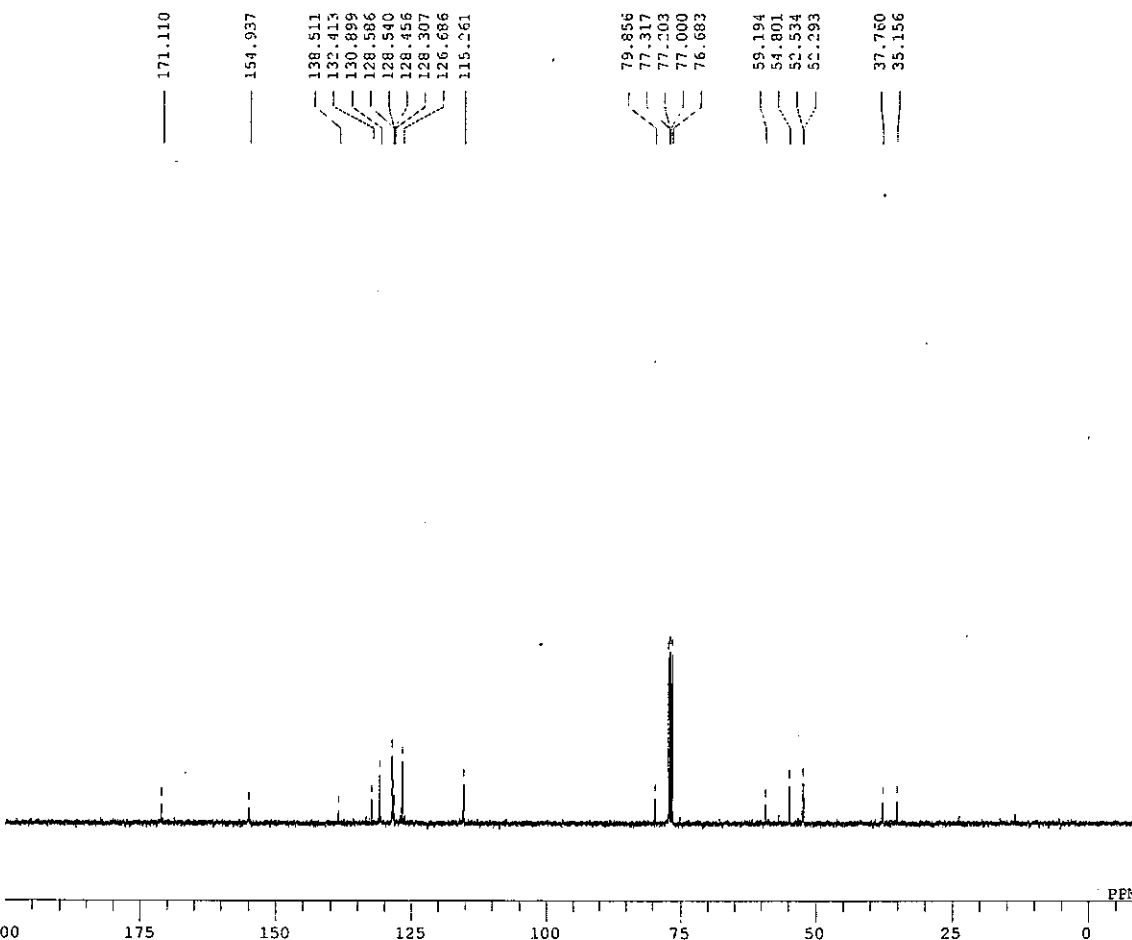

DFILE ykyk05-343-13c3\_1.als  
COMNT ykyk05-343-13c3  
DATIM 15-JUL-2010 20:18:41  
OBNUC 13C  
EXMOD single\_pulse\_dec  
OBFRQ 100.00 MHz  
OBSET 536.00 KHz  
OBFIN 361.11 Hz  
POINT 65536  
FREQU 25188.92 Hz  
SCANS 112  
ACQTM 2.6018 sec  
PD 1.5000 sec  
PW1 3.50 usec  
IRNUC 1H  
CTEMP 23.4 c  
SLVNT CDCL3  
EXREF 77.00 ppm  
BF 1.20 Hz  
RGAIN 24

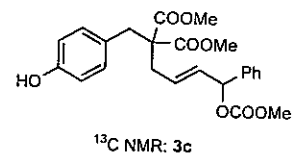



ykyk05-324-1h

G:\NMR\1h-1\ykyk05-324-1h 1.als

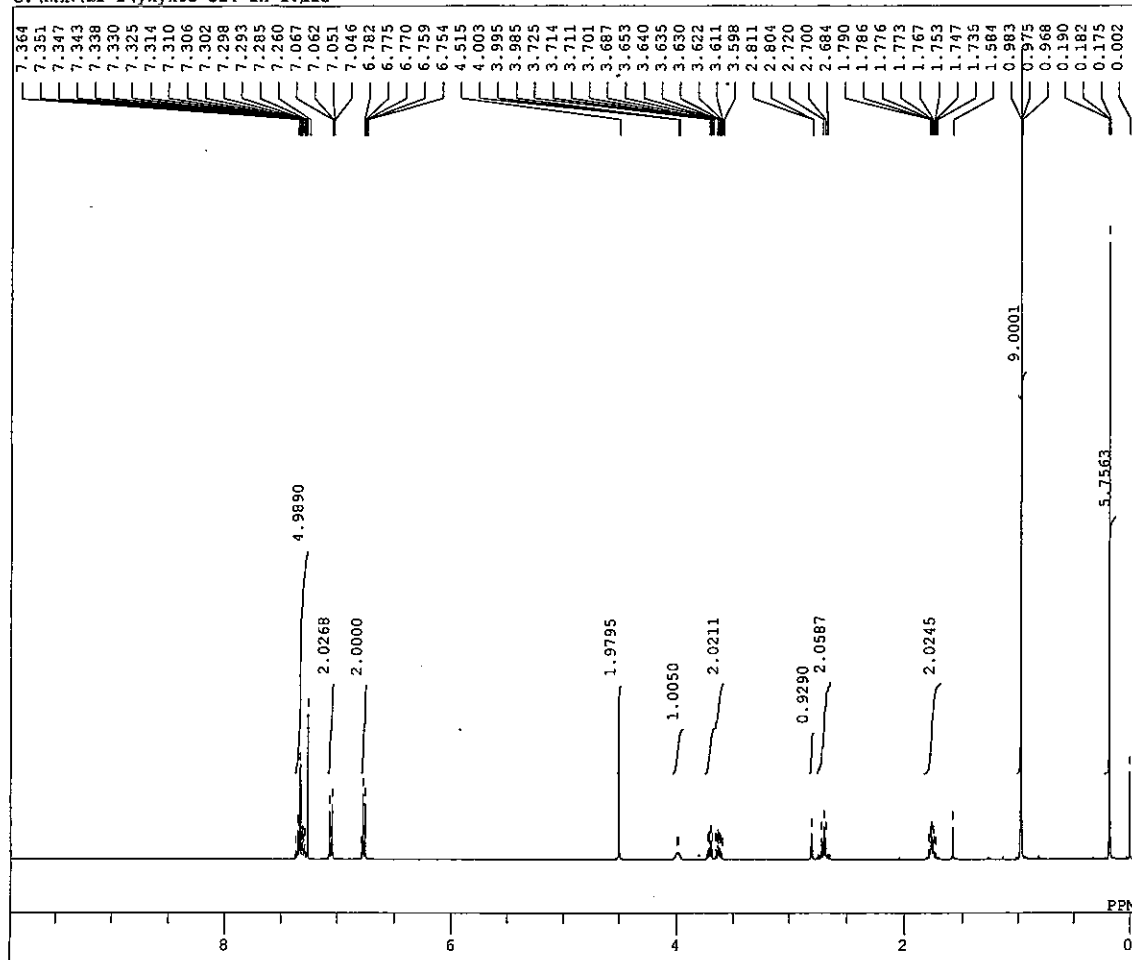

DFILE ykyk05-324-1h 1.als  
 COMNT ykyk05-324-1h  
 DATIM 18-MAR-2010 04:00:53  
 OBNUC 1H  
 EXMOD single\_pulse.exp  
 OBFRQ 399.00 MHz  
 OBSET 784.00 KHz  
 OBFIN 597.07 Hz  
 POINT 32768  
 FREQU 5998.80 Hz  
 SCANS 16  
 ACQTM 5.4624 sec  
 PD 2.0000 sec  
 PW1 6.85 usec  
 IRNUC 1H  
 CTEMP 20.1 c  
 SLVNT CDCL3  
 EXREF 7.26 ppm  
 BF 0.12 Hz  
 RGAIN 14

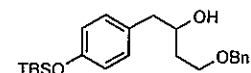<sup>1</sup>H-NMR: S-24

ykyk05-324-13c

G:\NMR\13c-1\ykyk05-324-13c 1.als

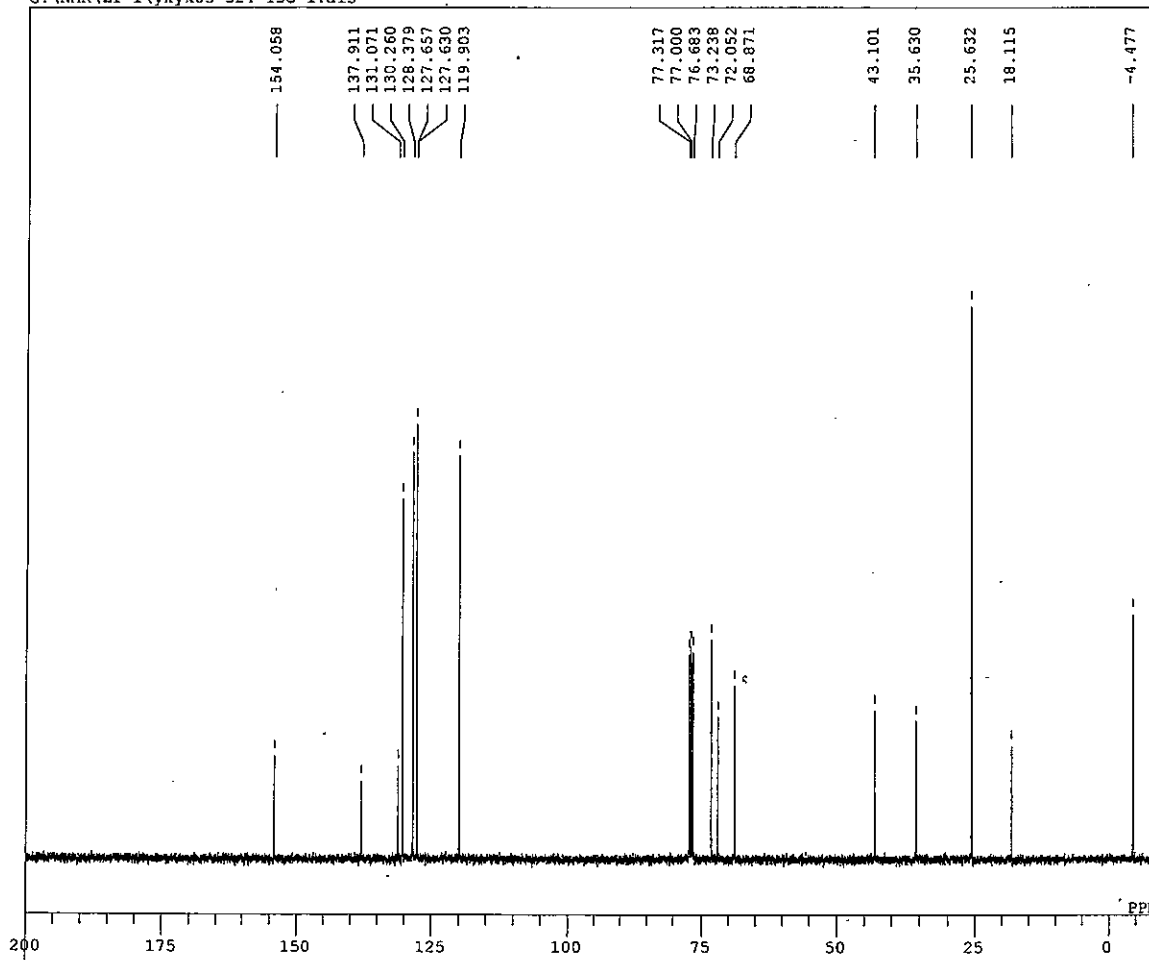

DFILE ykyk05-324-13c 1.als  
 COMNT ykyk05-324-13c  
 DATIM 18-MAR-2010 04:09:51  
 OBNUC 13C  
 EXMOD single\_pulse\_dec  
 OBFRQ 100.00 MHz  
 OBSET 536.00 KHz  
 OBFIN 361.11 Hz  
 POINT 65536  
 FREQU 25188.92 Hz  
 SCANS 78  
 ACQTM 2.6018 sec  
 PD 1.5000 sec  
 PW1 3.50 usec  
 IRNUC 13C  
 CTEMP 21.8 c  
 SLVNT CDCL3  
 EXREF 77.00 ppm  
 BF 1.20 Hz  
 RGAIN 23

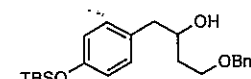<sup>13</sup>C NMR: S-24

ykyk05-331-1h

G:\NMR\kfi-1\ykyk05-331-1h 1.als

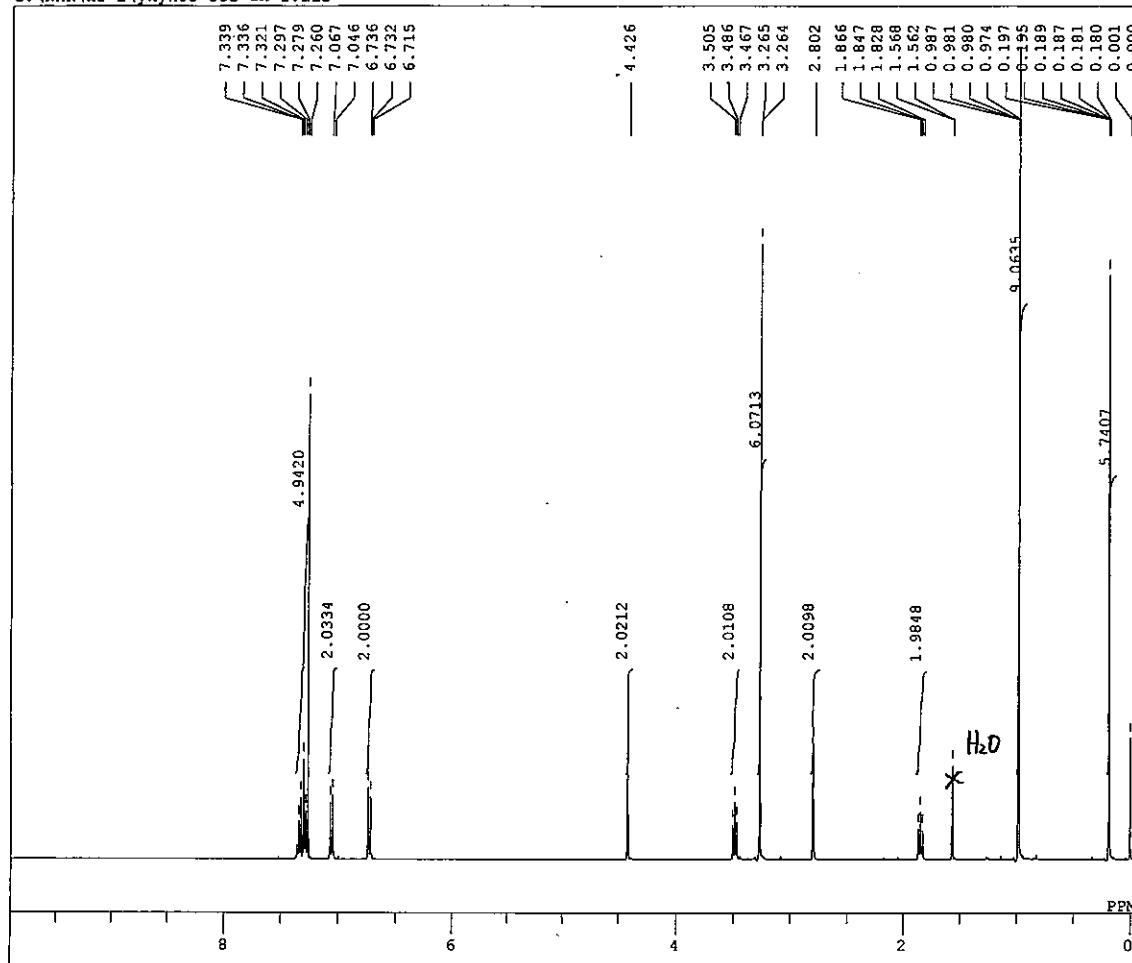

DFILE ykyk05-331-1h 1.als  
 COMNT ykyk05-331-1h  
 DATIM 24-MAR-2010 04:13:37  
 OBNUC 1H  
 EXMOD single\_pulse.exp  
 OBFRQ 399.00 MHz  
 OBSET 784.00 KHz  
 OBFIN 597.07 Hz  
 POINT 32768  
 FREQU 5998.80 Hz  
 SCANS 16  
 ACQTM 5.4624 sec  
 PD 2.0000 sec  
 PW1 6.85 usec  
 IRNUC 1H  
 CTEMP 21.0 c  
 SLVNT CDCL3  
 EXREF 7.26 ppm  
 BF 0.12 Hz  
 RGAIN 15

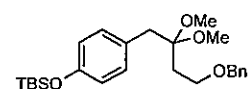<sup>1</sup>H-NMR: S-25

ykyk05-330-13c2

G:\NMR\kfi-1\ykyk05-330-13c2 1.als

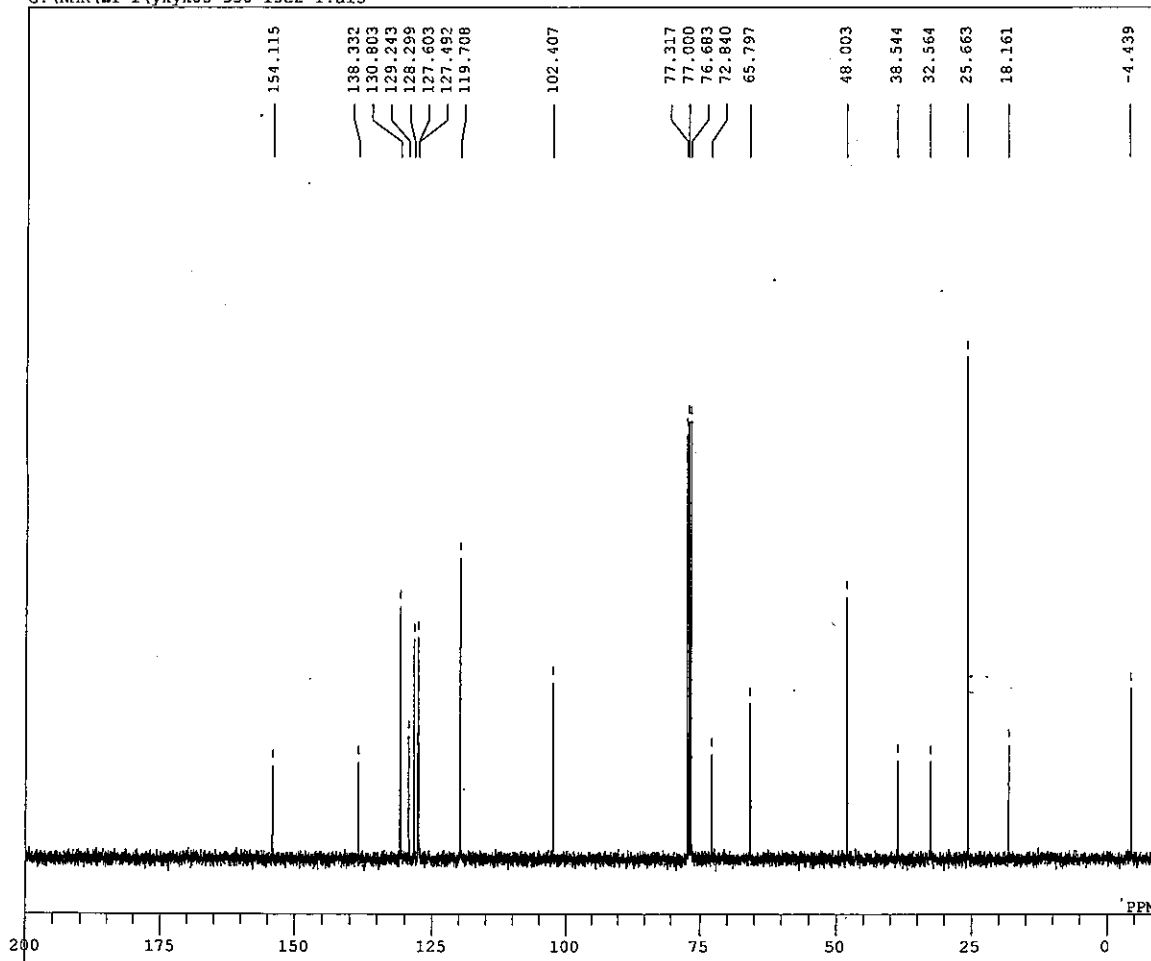

DFILE ykyk05-330-13c2 1.als  
 COMNT ykyk05-330-13c2  
 DATIM 21-MAR-2010 02:39:00  
 OBNUC 13C  
 EXMOD single\_pulse\_dec  
 OBFRQ 100.00 MHz  
 OBSET 536.00 KHz  
 OBFIN 361.11 Hz  
 POINT 65536  
 FREQU 25188.92 Hz  
 SCANS 86  
 ACQTM 2.6018 sec  
 PD 1.5000 sec  
 PW1 3.50 usec  
 IRNUC 13C  
 CTEMP 21.9 c  
 SLVNT CDCL3  
 EXREF 77.00 ppm  
 BF 1.20 Hz  
 RGAIN 24

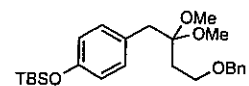<sup>13</sup>C NMR: S-25

page 5-80

ykyk05-333-1h

G:\NMR\1h\ykyk05-333-1h 1.als

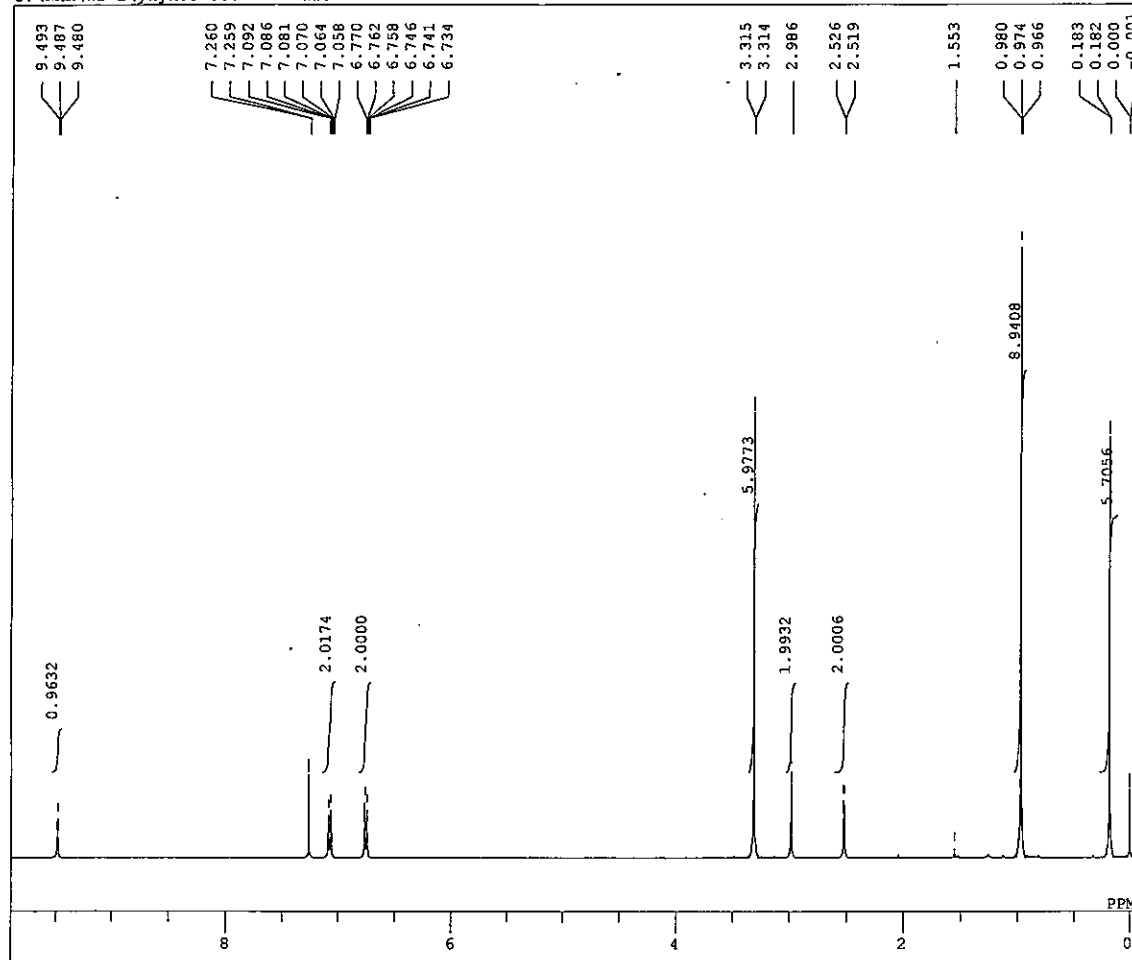

DFILE ykyk05-333-1h 1.als  
 COMNT ykyk05-333-1h  
 DATIM 25-MAR-2010 01:29:44  
 OBNUC 1H  
 EXMOD single\_pulse\_exp  
 OBFRQ 399.00 MHz  
 OBSET 784.00 KHz  
 OBFIN 597.07 Hz  
 POINT 32768  
 FREQU 5998.80 Hz  
 SCANS 16  
 ACQTM 5.4624 sec  
 PD 2.0000 sec  
 PW1 6.85 usec  
 IRNUC 1H  
 CTEMP 25.0 c  
 SLVNT CDCL3  
 EXREF 7.26 ppm  
 BF 0.12 Hz  
 RGAIN 14

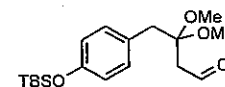<sup>1</sup>H-NMR: S-26

ykyk05-333-13c

G:\NMR\13c\ykyk05-333-13c 1.als

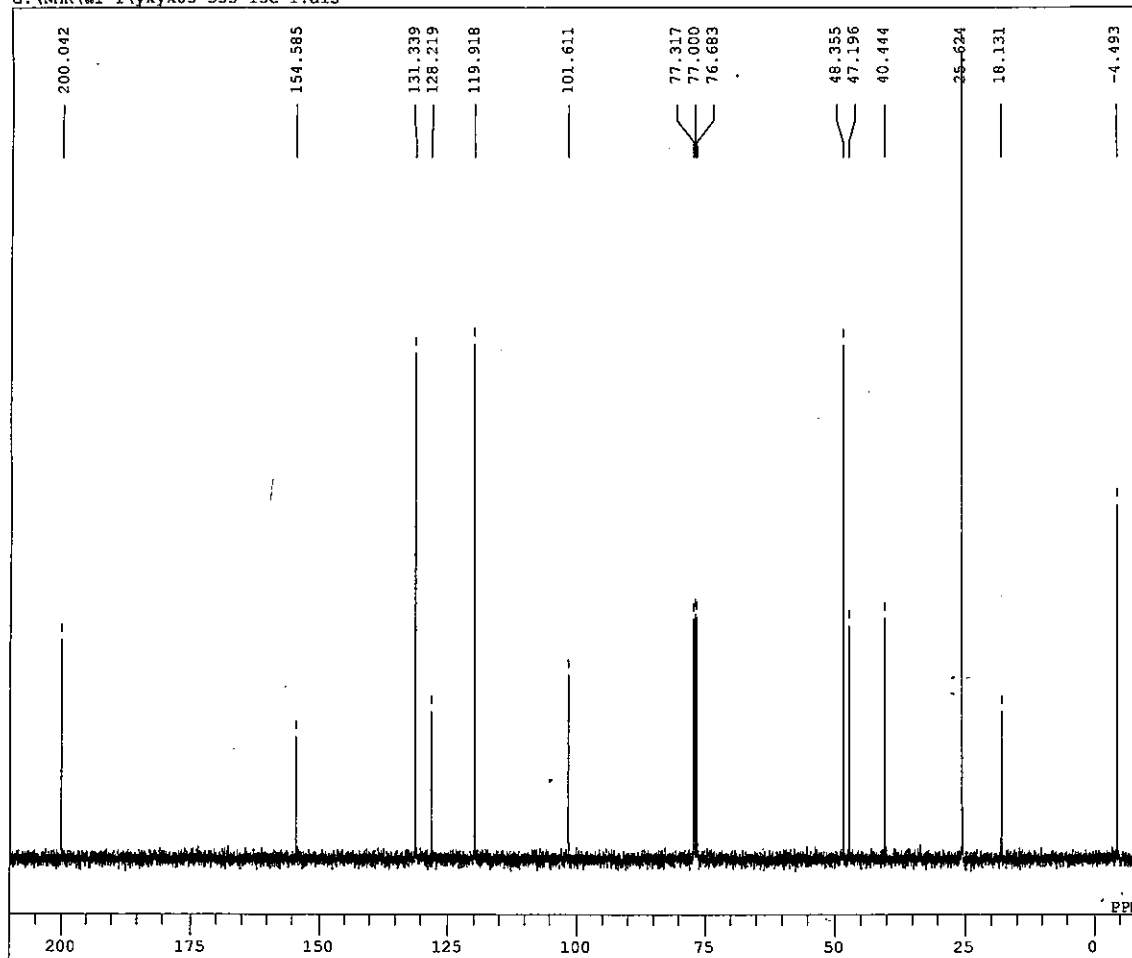

DFILE ykyk05-333-13c\_1.als  
 COMNT ykyk05-333-13c  
 DATIM 25-MAR-2010 01:35:40  
 OBNUC 13C  
 EXMOD single\_pulse\_dec  
 OBFRQ 100.00 MHz  
 OBSET 536.00 KHz  
 OBFIN 361.11 Hz  
 POINT 65536  
 FREQU 25188.92 Hz  
 SCANS 33  
 ACQTM 2.6018 sec  
 PD 1.5000 sec  
 PW1 3.50 usec  
 IRNUC 13C  
 CTEMP 25.0 c  
 SLVNT CDCL3  
 EXREF 77.00 ppm  
 BF 1.20 Hz  
 RGAIN 24

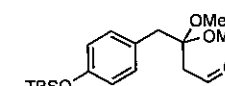<sup>13</sup>C NMR: S-26

page 5-81

ykyk05-336-1h

G:\NMR\af-i\ykyk05-336-1h 1.als

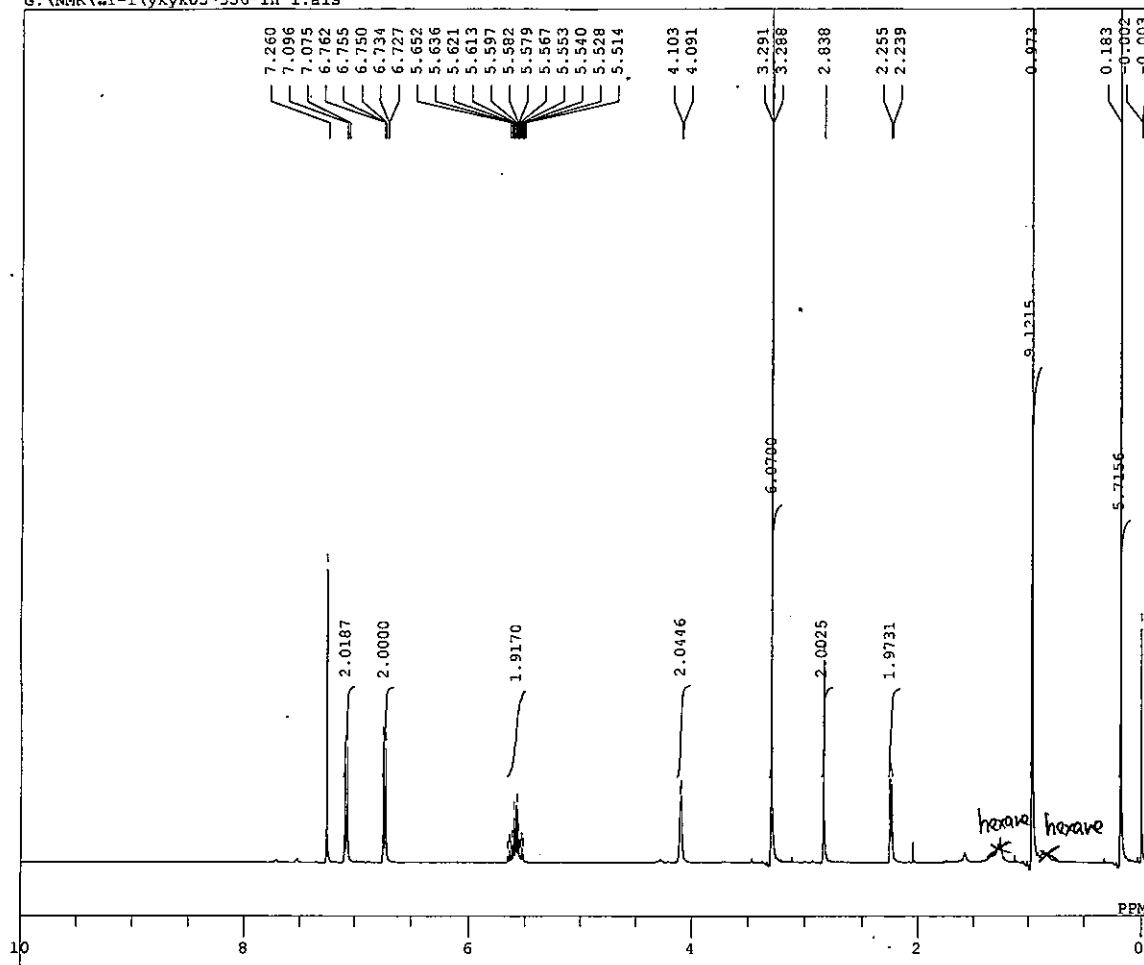

DFILE ykyk05-336-1h 1.als  
 COMNT ykyk05-336-1h  
 DATIM 27-MAR-2010 04:57:57  
 OBNUC 1H  
 EXMOD single\_pulse.exp  
 OBFRQ 399.00 MHz  
 OBSET 784.00 KHz  
 OBFIN 597.07 Hz  
 POINT 32768  
 FREQU 5998.80 Hz  
 SCANS 16  
 ACQTM 5.4624 sec  
 PD 2.0000 sec  
 PW1 6.85 usec  
 IRNUC 1H  
 CTEMP 20.3 c  
 SLVNT CDCL3  
 EXREF 7.26 ppm  
 BF 0.12 Hz  
 RGAIN 14

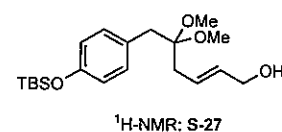

ykyk05-336-13c

G:\NMR\af-i\ykyk05-336-13c 1.als

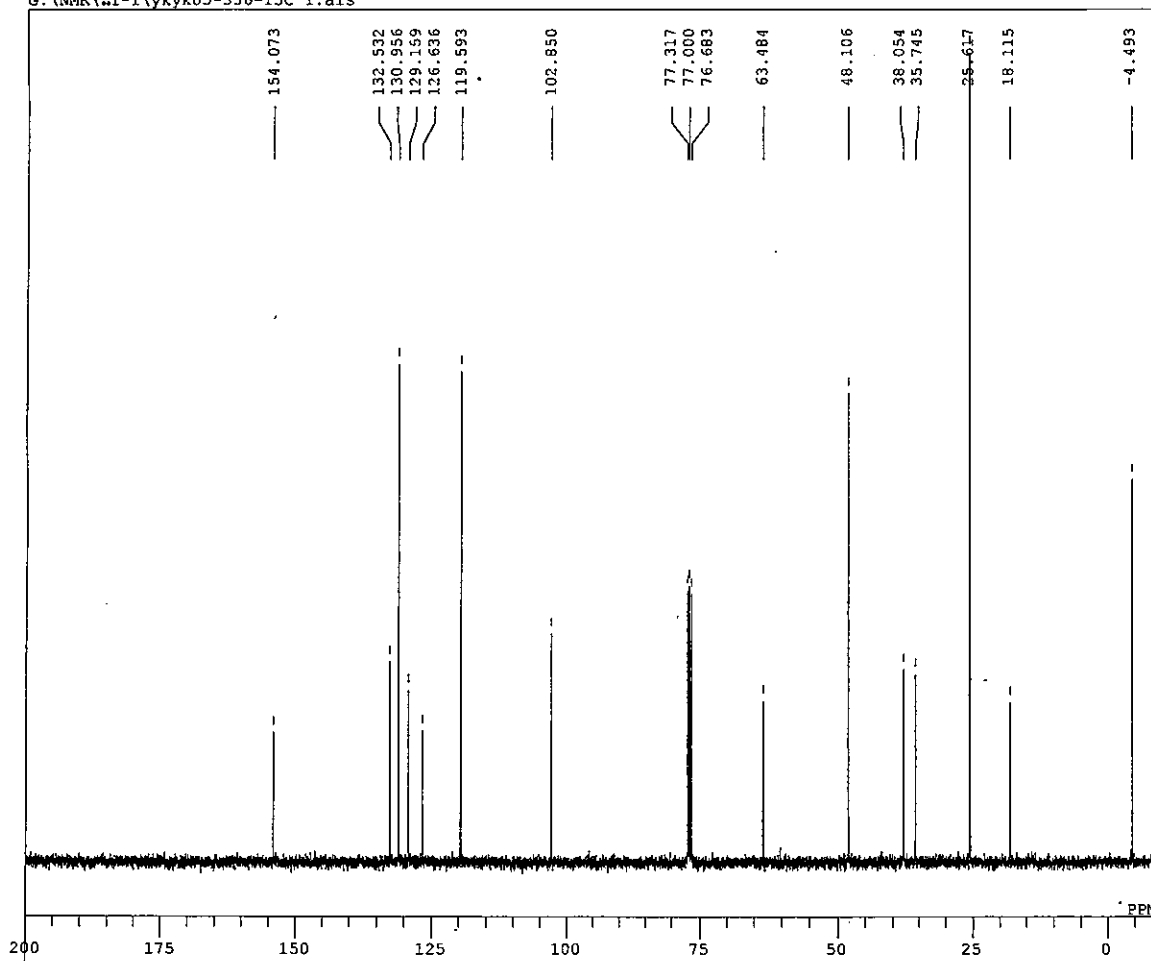

DFILE ykyk05-336-13c 1.als  
 COMNT ykyk05-336-13c  
 DATIM 27-MAR-2010 05:14:05  
 OBNUC 13C  
 EXMOD single\_pulse\_dec  
 OBFRQ 100.00 MHz  
 OBSET 536.00 KHz  
 OBFIN 361.11 Hz  
 POINT 65536  
 FREQU 25188.92 Hz  
 SCANS 47  
 ACQTM 2.6018 sec  
 PD 1.5000 sec  
 PW1 3.50 usec  
 IRNUC 1H  
 CTEMP 22.1 c  
 SLVNT CDCL3  
 EXREF 77.00 ppm  
 BF 1.20 Hz  
 RGAIN 23

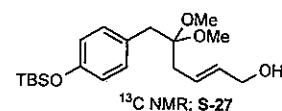

ykyk05-337-1h

G:\NMR\h1-1\ykyk05-337-1h 1.als

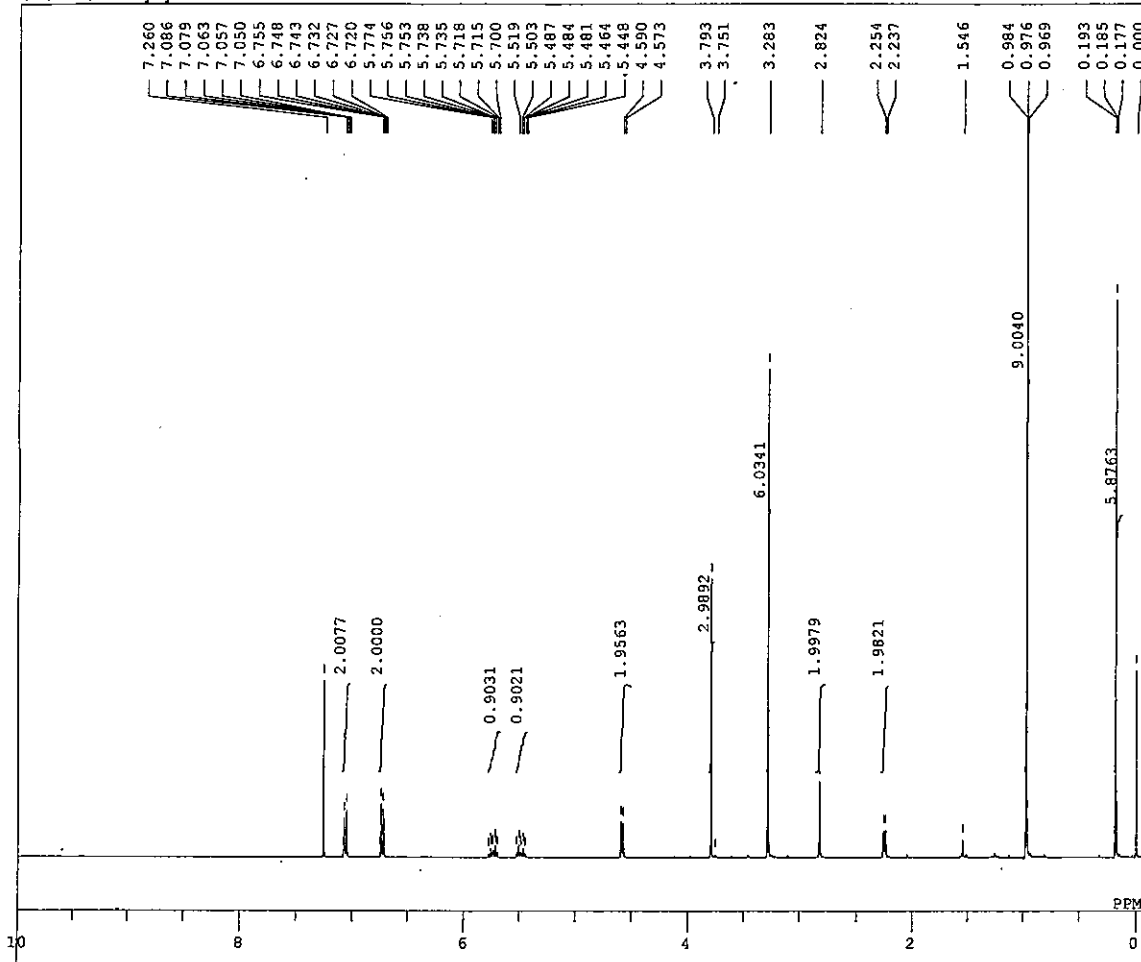

DFILE ykyk05-337-1h 1.als  
COMNT ykyk05-337-1h  
DATIM 28-MAR-2010 02:49:47  
OBNUC 1H  
EXMOD single\_pulse\_exp  
OBFRQ 399.00 MHz  
OBSET 784.00 KHz  
OBFIN 597.07 Hz  
POINT 32768  
FREQU 5998.80 Hz  
SCANS 16  
ACQTM 5.4624 sec  
PD 2.0000 sec  
FW1 6.85 usec  
IRNUC 1H  
CTEMP 25.0 c  
SLVNT CDCL3  
EXREF 7.26 ppm  
BF 0.12 Hz  
RGAIN 16

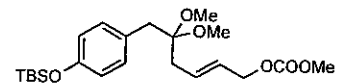

<sup>1</sup>H-NMR: S-28

ykyk05-337-13c

G:\NMR\h1-1\ykyk05-337-13c 1.als

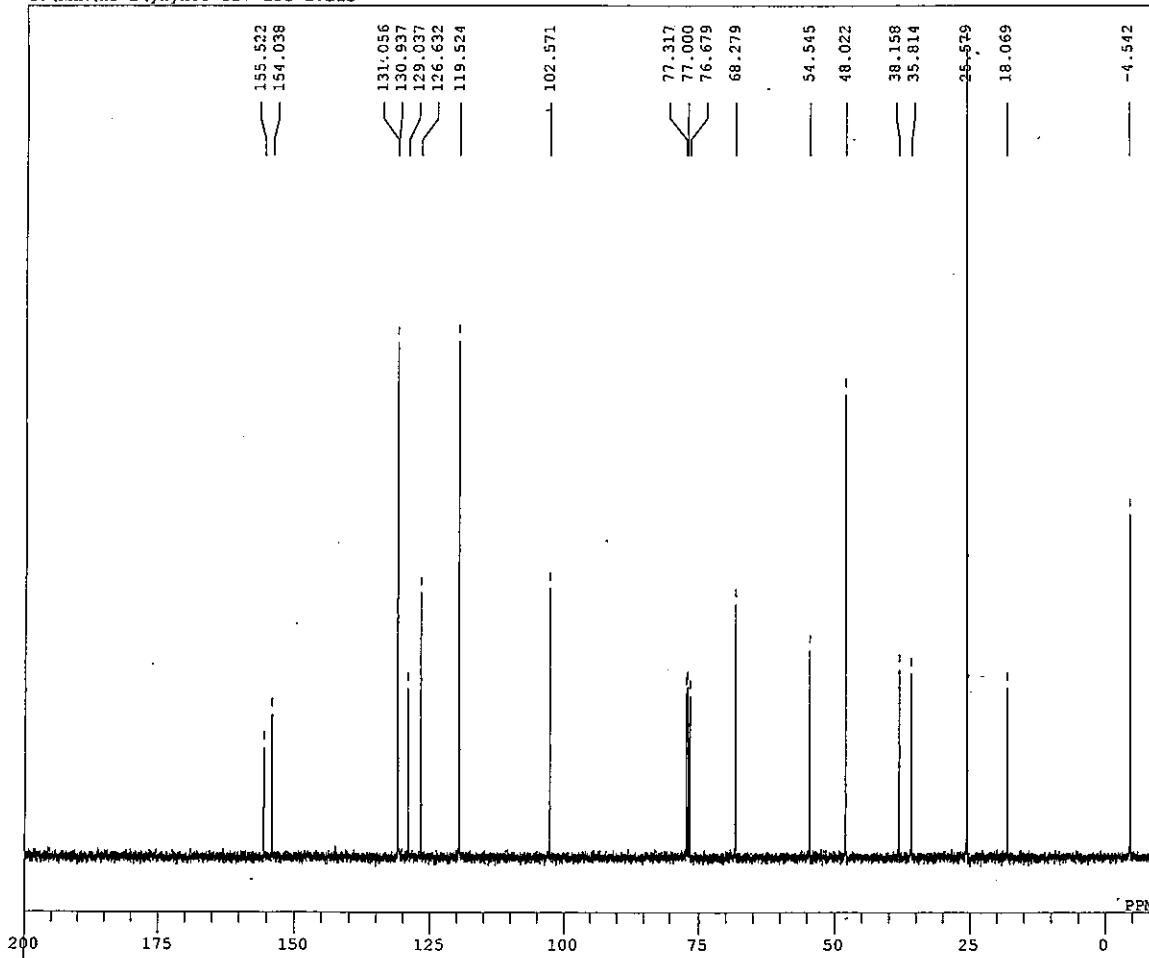

DFILE ykyk05-337-13c 1.als  
COMNT ykyk05-337-13c  
DATIM 28-MAR-2010 02:54:49  
OBNUC 13C  
EXMOD single\_pulse\_dec  
OBFRQ 100.00 MHz  
OBSET 536.00 KHz  
OBFIN 361.11 Hz  
POINT 65536  
FREQU 25188.92 Hz  
SCANS 26  
ACQTM 2.6018 sec  
PD 1.5000 sec  
FW1 3.50 usec  
IRNUC 13C  
CTEMP 25.0 c  
SLVNT CDCL3  
EXREF 77.00 ppm  
BF 1.20 Hz  
RGAIN 23

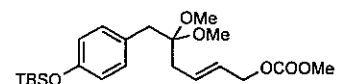

<sup>13</sup>C NMR: S-28

ykyk05-338-1h

G:\NMR\1h-1\ykyk05-338-1h 1.als

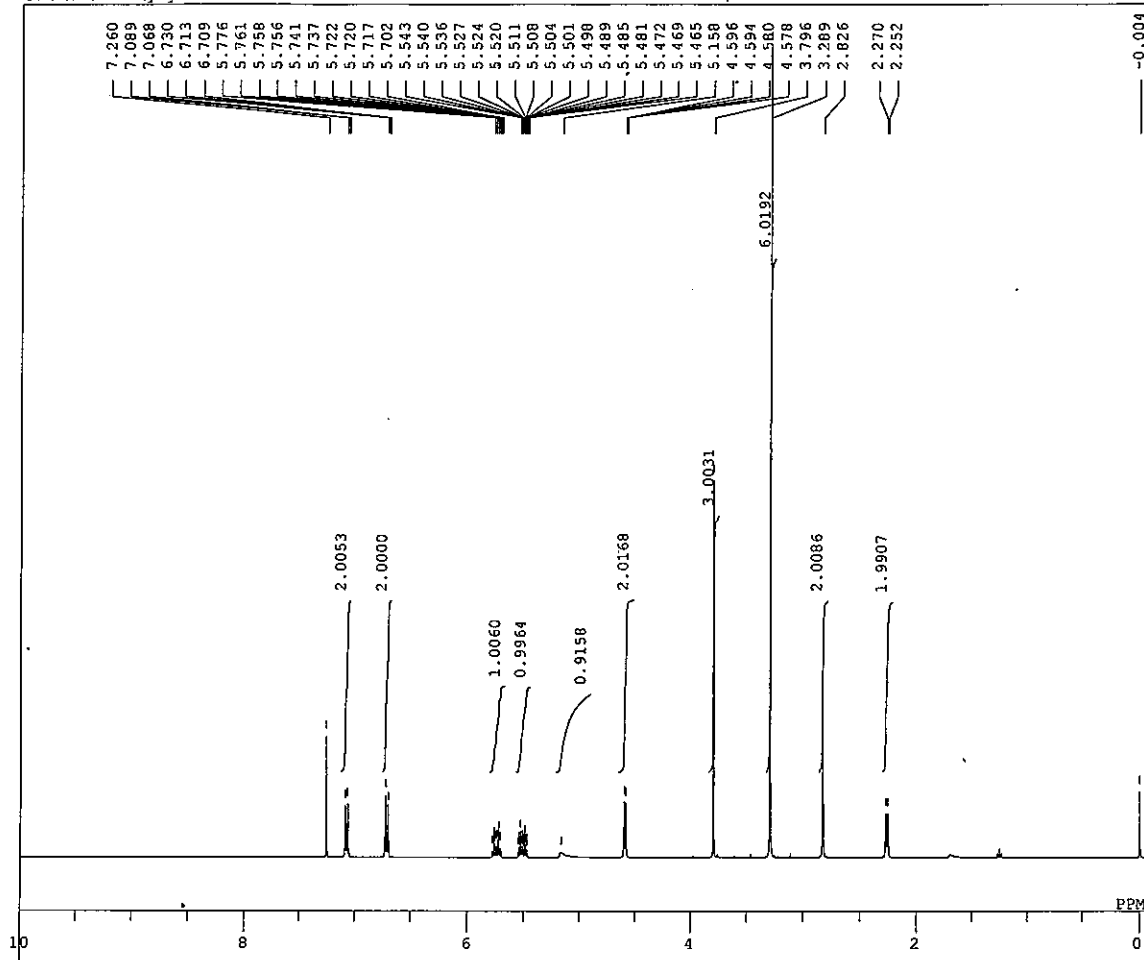

DFILE ykyk05-338-1h 1.als  
 COMNT ykyk05-338-1h  
 DATIM 30-MAR-2010 03:24:35  
 OBNUC 1H  
 EXMOD single\_pulse.exp  
 OBFRQ 399.00 MHz  
 OBSET 784.00 KHz  
 OBFIN 597.07 Hz  
 POINT 32768  
 FREQU 5998.80 Hz  
 SCANS 16  
 ACQTM 5.4624 sec  
 PD 2.0000 sec  
 PW1 6.85 usec  
 IRNUC 1H  
 CTEMP 20.2 c  
 SLVNT CDCL3  
 EXREF 7.26 ppm  
 BF 0.12 Hz  
 RGAIN 14

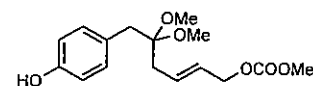<sup>1</sup>H-NMR: 3d

ykyk05-338-13c

G:\NMR\1h-1\ykyk05-338-13c 1.als

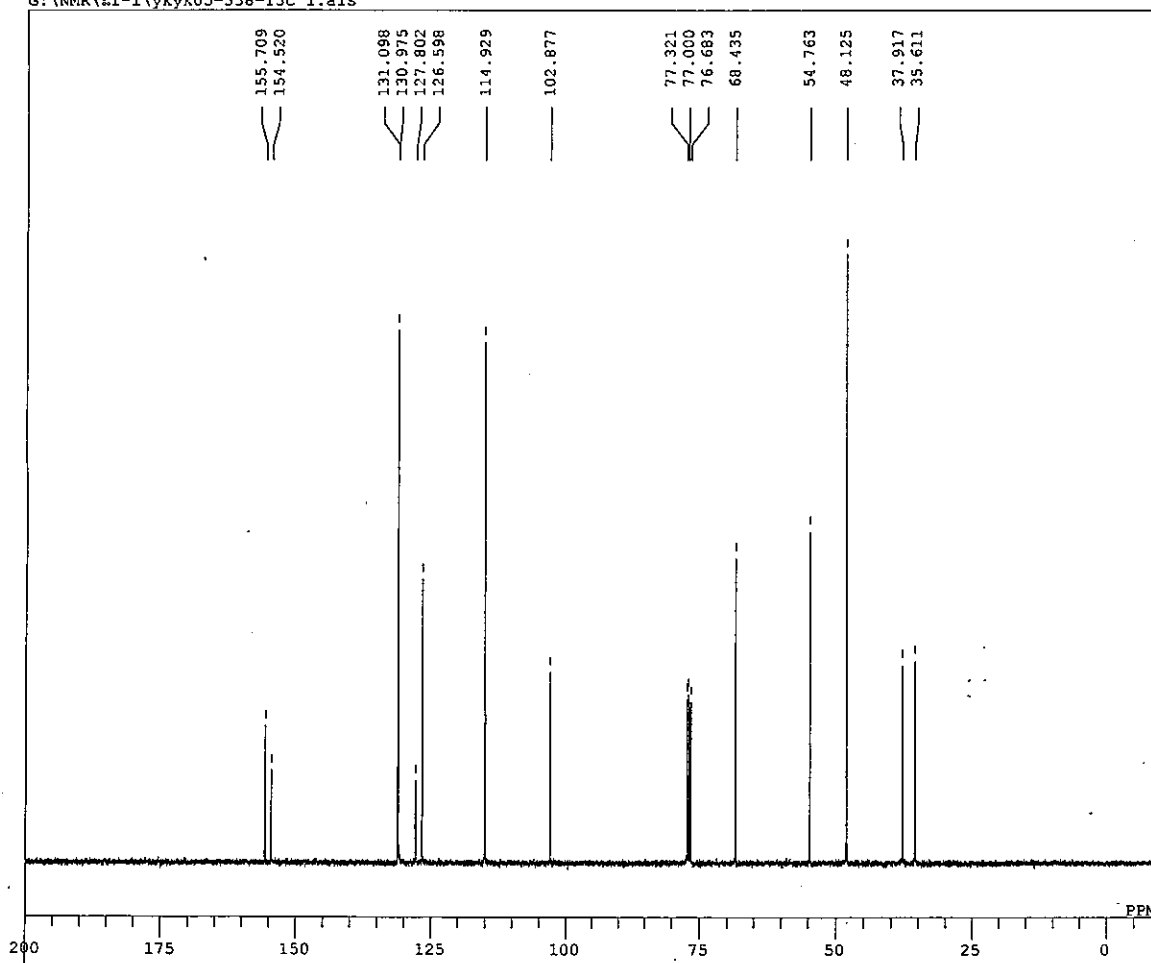

DFILE ykyk05-338-13c 1.als  
 COMNT ykyk05-338-13c  
 DATIM 30-MAR-2010 03:36:33  
 OBNUC 13C  
 EXMOD single\_pulse\_dec  
 OBFRQ 100.00 MHz  
 OBSET 536.00 KHz  
 OBFIN 361.11 Hz  
 POINT 65536  
 FREQU 25188.92 Hz  
 SCANS 121  
 ACQTM 2.6018 sec  
 PD 1.5000 sec  
 PW1 3.50 usec  
 IRNUC 1H  
 CTEMP 21.5 c  
 SLVNT CDCL3  
 EXREF 77.00 ppm  
 BF 1.20 Hz  
 RGAIN 23

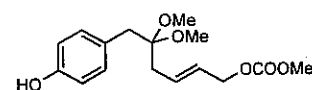<sup>13</sup>C NMR: 3d

# YKYI-p8-mal-3-1H

G:\NMR\12<81\2008"N"x\lf-N\ -q-p8il-Uj\L p8-malonnate\YI-p8-malonnate-3-1H 1.als

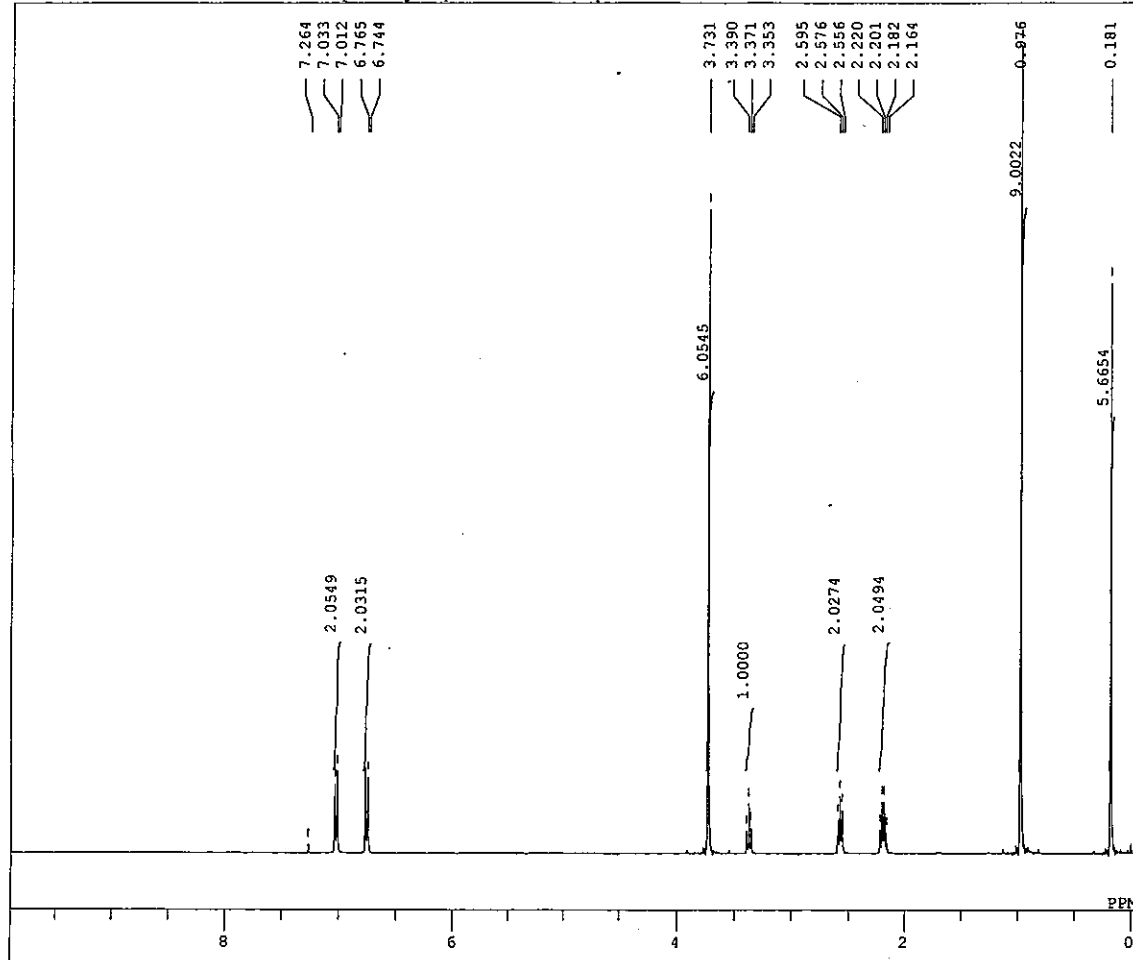

DFILE YI-p8-malonnate-3-1H 1.als  
COMNT YKYI-p8-mal-3-1H  
DATIM 1-DEC-2008 17:34:34  
OBNUC 1H  
EXMOD single\_pulse.exp  
OBFRQ 399.00 MHz  
OBSET 784.00 KHz  
OBFIN 597.07 Hz  
POINT 32768  
FREQU 5998.80 Hz  
SCANS 8  
ACQTM 5.4624 sec  
PD 2.0000 sec  
PW1 6.70 usec  
IRNUC 1H  
CTEMP 18.7 c  
SLVNT CDCL3  
EXREF 0.00 ppm  
BF 0.12 Hz  
RGAIN 9

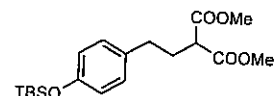

<sup>1</sup>H-NMR: S-29

# YKYI-p8-mal-3-13C

G:\NMR\12<81\2008"N"x\lf-N\ -q-p8il-Uj\L p8-malonnate\YI-p8-malonnate-3-13C 1.als

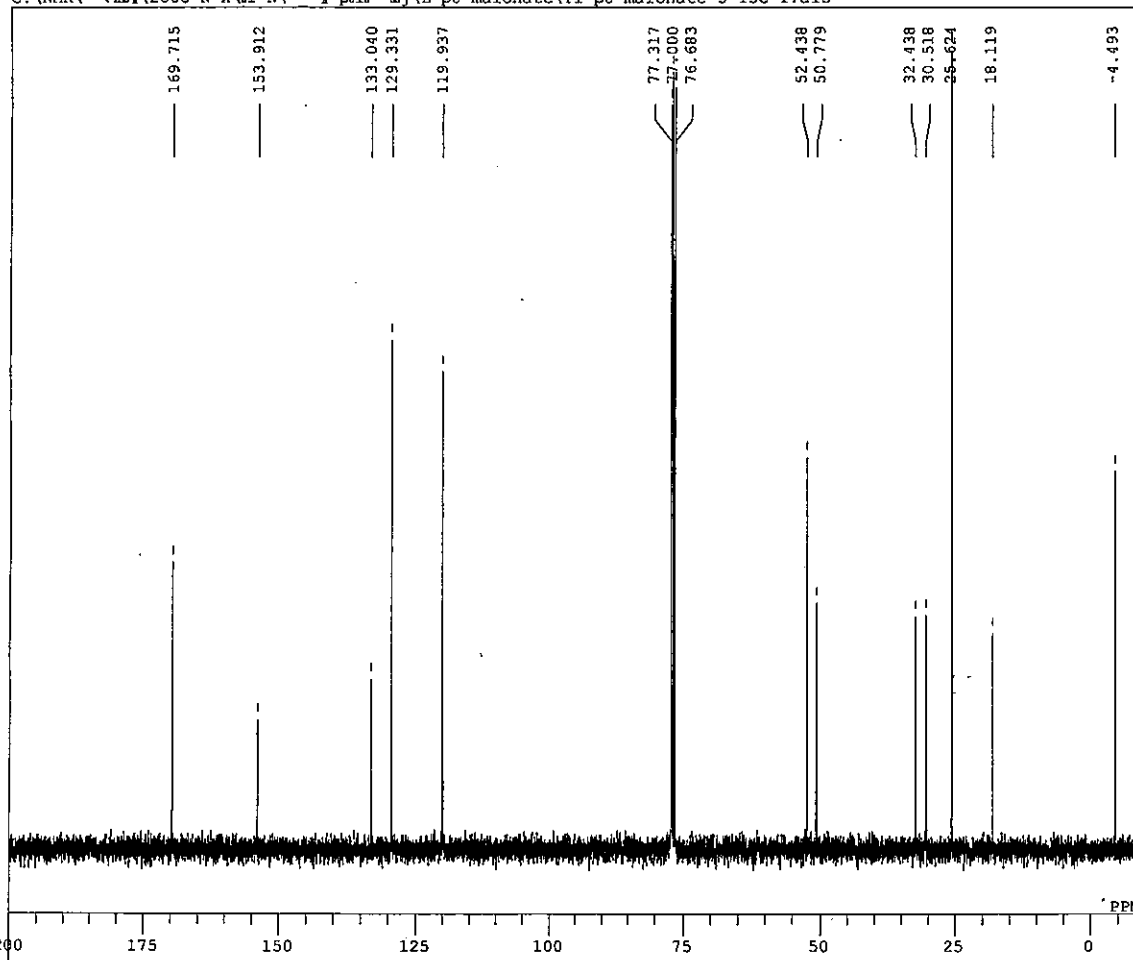

DFILE YI-p8-malonnate-3-13C 1.als  
COMNT YKYI-p8-mal-3-13C  
DATIM 1-DEC-2008 17:48:50  
OBNUC 13C  
EXMOD single\_pulse\_dec  
OBFRQ 100.00 MHz  
OBSET 536.00 KHz  
OBFIN 361.11 Hz  
POINT 65536  
FREQU 25188.92 Hz  
SCANS 164  
ACQTM 2.6018 sec  
PD 1.5000 sec  
PW1 3.50 usec  
IRNUC 13C  
CTEMP 20.1 c  
SLVNT CDCL3  
EXREF 77.00 ppm  
BF 1.20 Hz  
RGAIN 26

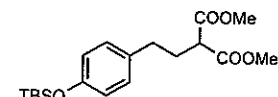

<sup>13</sup>C NMR: S-29

# YKYI-p8-mal-2-1H

G:\NMR\12<2008"N"x\p8-mal-2-1H\p8-mal-2-1H 1.als

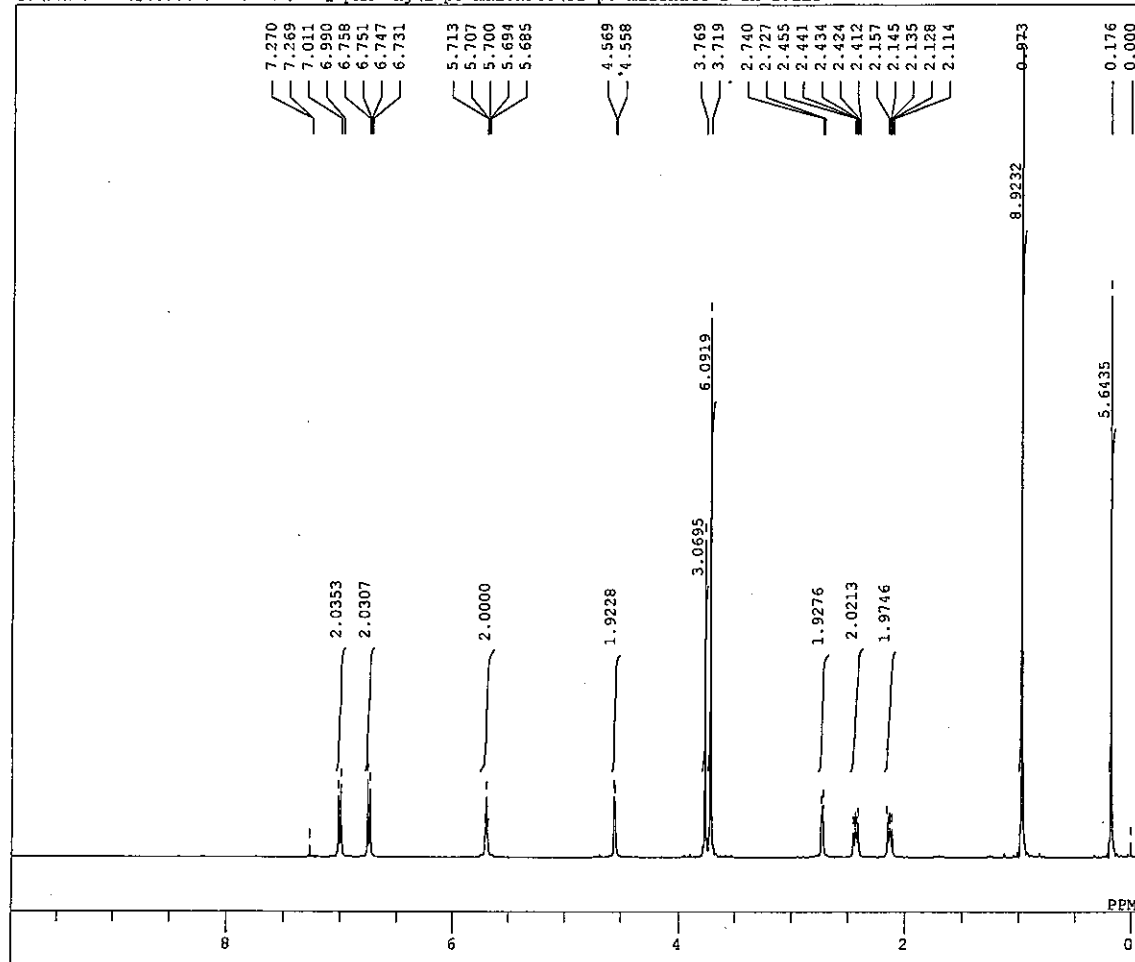

DFILE YI-p8-mal-2-1H\_1.als  
COMNT YKYI-p8-mal-2-1H  
DATIM 4-DEC-2008 18:40:29  
OBNUC 1H  
EXMOD single\_pulse.exp  
OBFRQ 399.00 MHz  
OBSET 784.00 KHz  
OBFIN 597.07 Hz  
POINT 32768  
FREQU 5998.80 Hz  
SCANS 8  
ACQTM 5.4624 sec  
PD 2.0000 sec  
PWL 6.70 usec  
IRNUC 1H  
CTEMP 18.8 c  
SLVNT CDCL3  
EXREF 0.00 ppm  
BF 0.12 Hz  
RGAIN 10

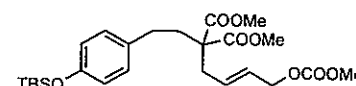

<sup>1</sup>H-NMR: S-30

# YKYI-p8-mal-2-13C

G:\NMR\12<2008"N"x\p8-mal-2-13C\p8-mal-2-13C 1.als

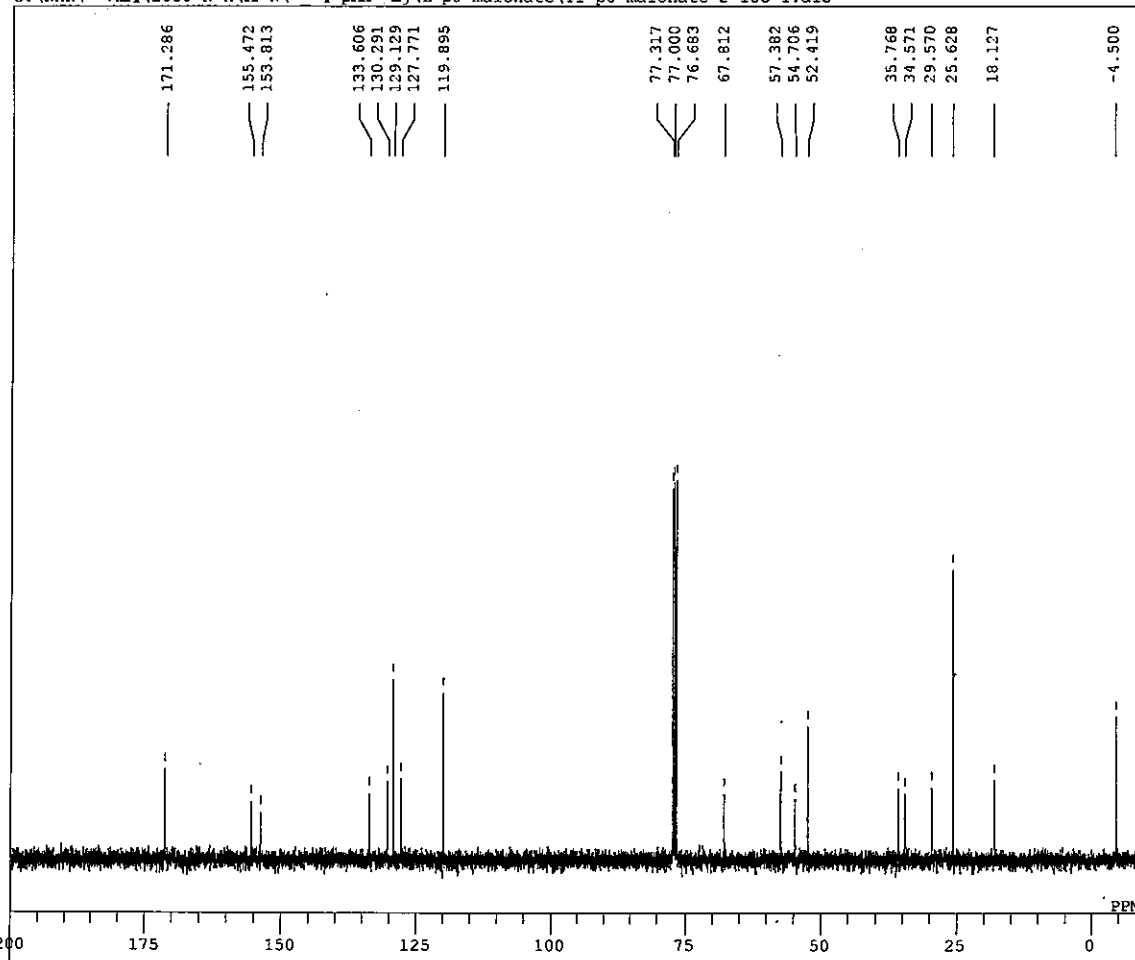

DFILE YI-p8-mal-2-13C\_1.als  
COMNT YKYI-p8-mal-2-13C  
DATIM 4-DEC-2008 18:51:22  
OBNUC 13C  
EXMOD single\_pulse\_dec  
OBFRQ 100.00 MHz  
OBSET 536.00 KHz  
OBFIN 361.11 Hz  
POINT 65536  
FREQU 25188.92 Hz  
SCANS 107  
ACQTM 2.6018 sec  
PD 1.5000 sec  
PWL 3.50 usec  
IRNUC 13C  
CTEMP 20.1 c  
SLVNT CDCL3  
EXREF 77.00 ppm  
BF 1.20 Hz  
RGAIN 26

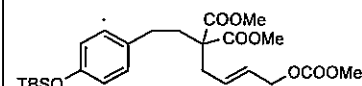

<sup>13</sup>C NMR: S-30



# YKYI-p8-mal-1

G:\NMR\12<2008"N"x\11-N\~ •T-p8ilj~L p8-malonate\YI-p8-malonate-1-1H 1.als

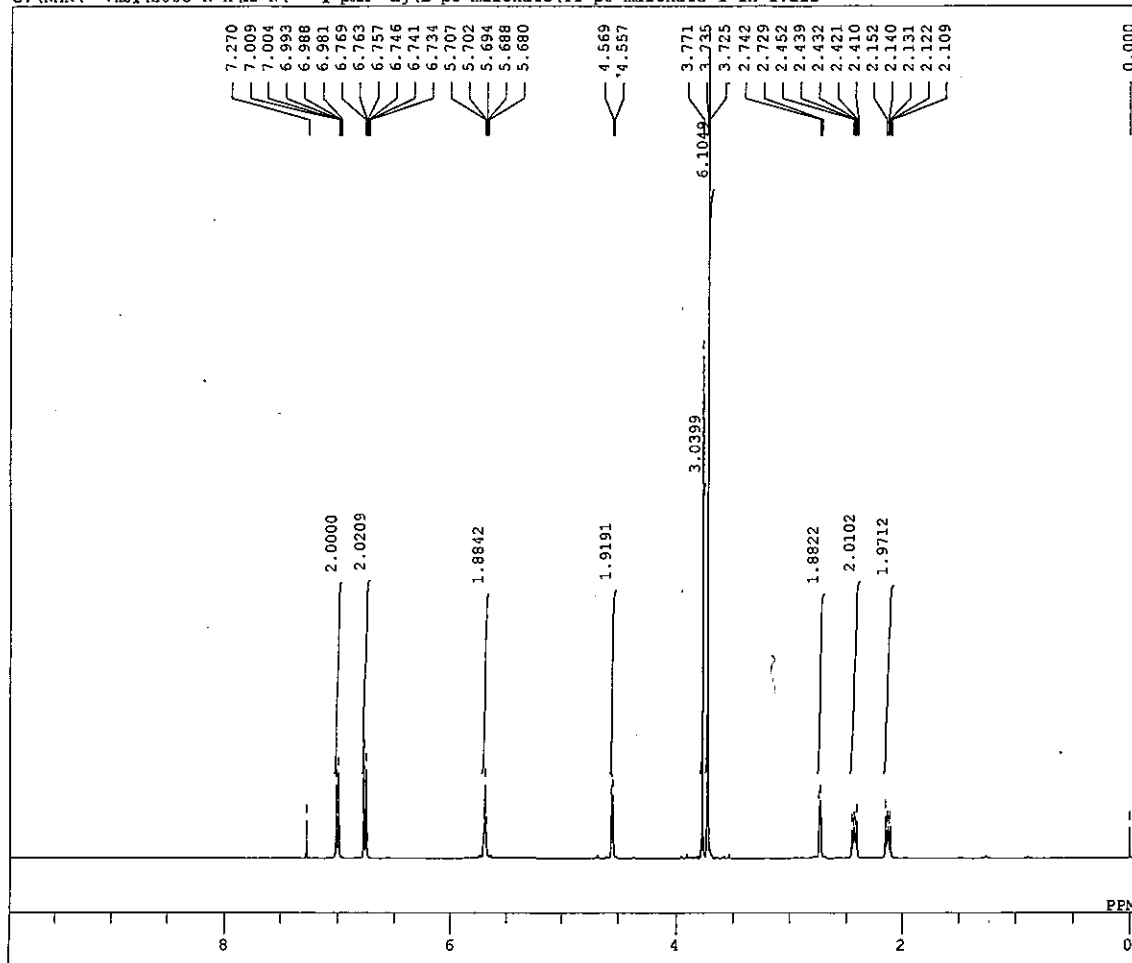

DFILE YI-p8-malonate-1-1H\_1.als  
 COMNT YKYI-p8-mal-1  
 DATIM 5-DEC-2008 18:34:43  
 OBNUC 1H  
 EXMOD single\_pulse.exp  
 OBFRQ 399.00 MHz  
 OBSET 784.00 KHz  
 OBFIN 597.07 Hz  
 POINT 32768  
 FREQU 5998.80 Hz  
 SCANS 8  
 ACQTM 5.4624 sec  
 PD 2.0000 sec  
 PW1 6.70 usec  
 IRNUC 1H  
 CTEMP 18.4 c  
 SLVNT CDCL3  
 EXREF 0.00 ppm  
 BF 0.12 Hz  
 RGAIN 12

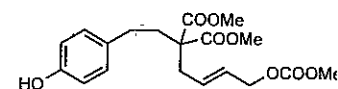

<sup>1</sup>H-NMR: 7

# YKYI-p8-mal-1-13C

G:\NMR\12<2008"N"x\11-N\~ •T-p8ilj~L p8-malonate\YI-p8-malonate-1-13C 1.als

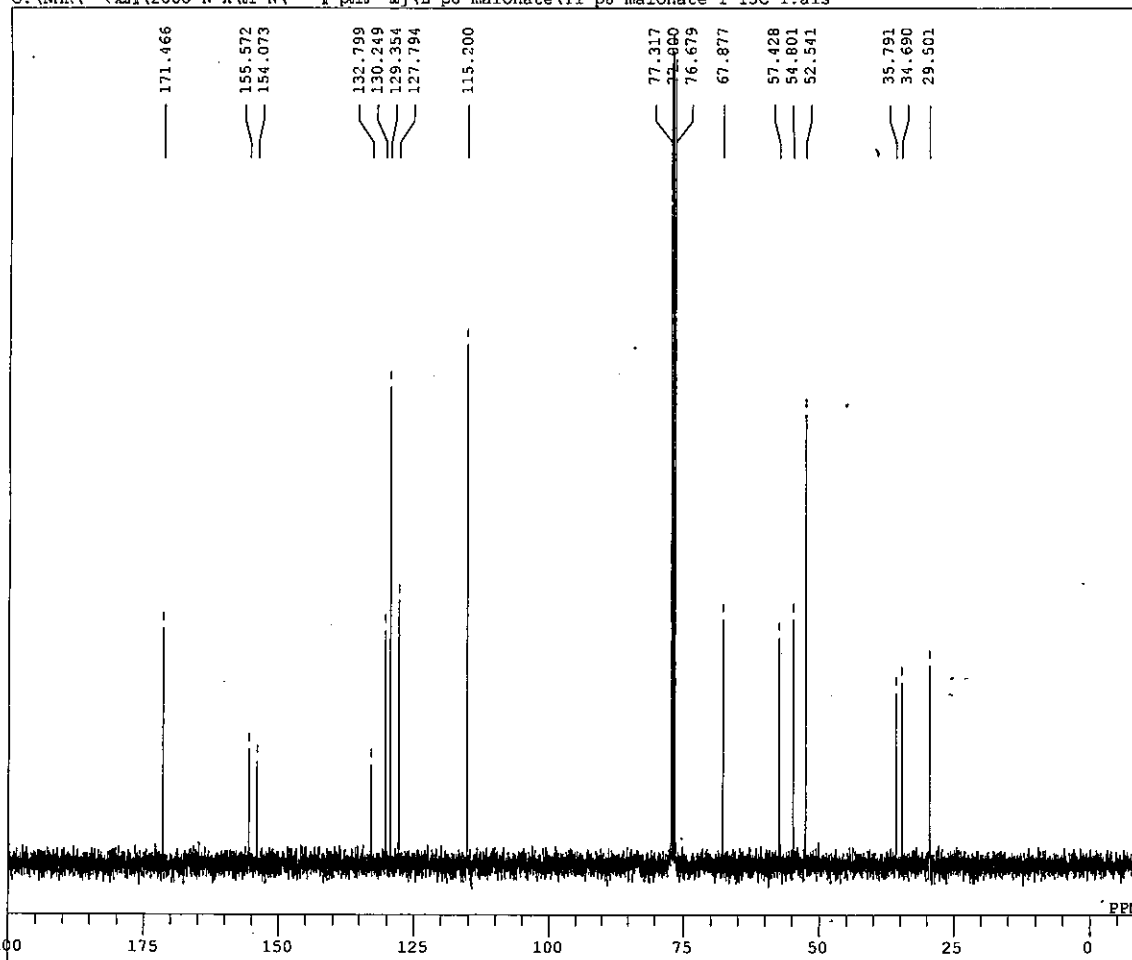

DFILE YI-p8-malonate-1-13C\_1.als  
 COMNT YKYI-p8-mal-1-13C  
 DATIM 5-DEC-2008 18:41:45  
 OBNUC 13C  
 EXMOD single\_pulse\_dec  
 OBFRQ 100.00 MHz  
 OBSET 536.00 KHz  
 OBFIN 361.11 Hz  
 POINT 65536  
 FREQU 25188.92 Hz  
 SCANS 73  
 ACQTM 2.6018 sec  
 PD 1.5000 sec  
 PW1 3.50 usec  
 IRNUC 1H  
 CTEMP 20.1 c  
 SLVNT CDCL3  
 EXREF 77.00 ppm  
 BF 1.20 Hz  
 RGAIN 26

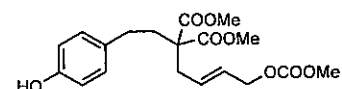

<sup>13</sup>C NMR: 7

page

5-87

## YKYI-09-713

G:\NMR\12&lt;2008"N"x\01-N\ -1-pli-0-Tj\YI-09-713 1.als

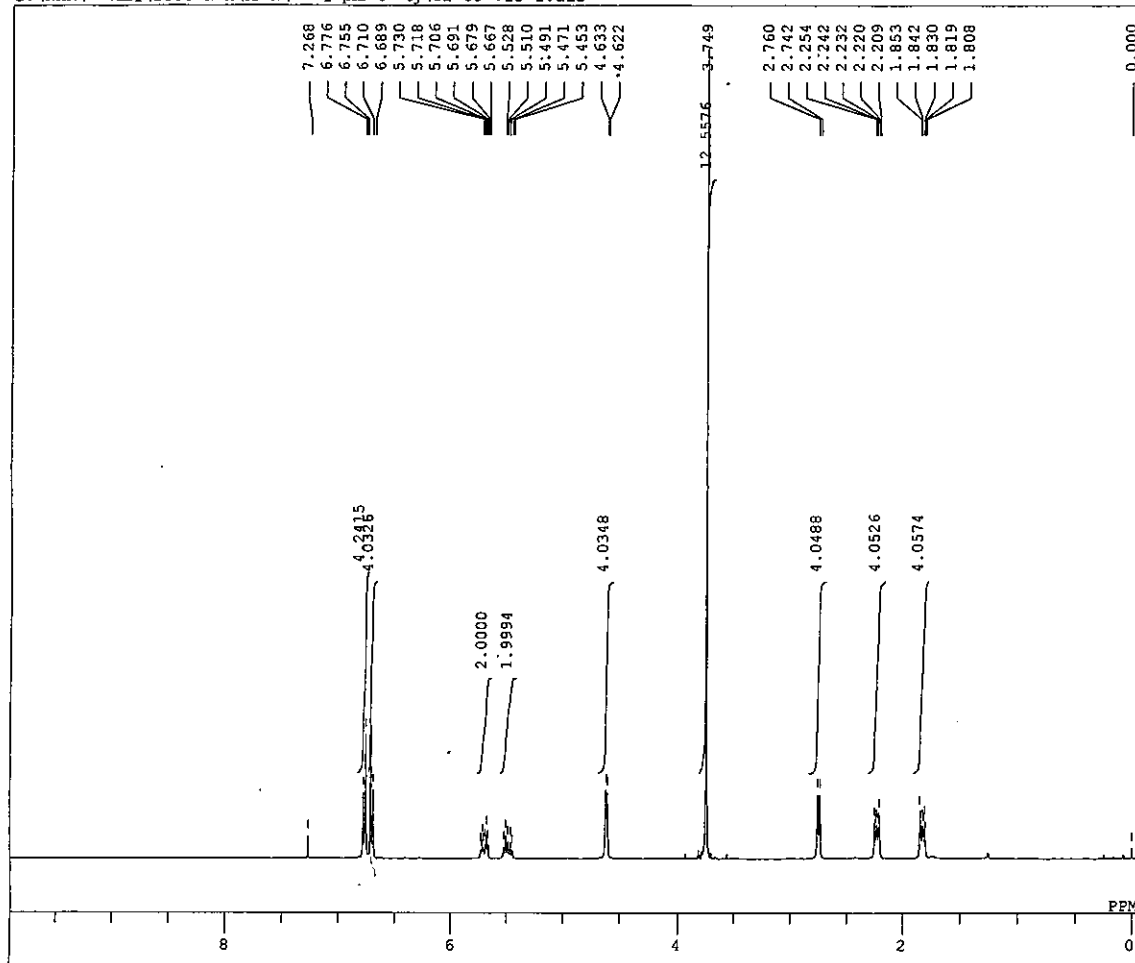

DFILE YI-09-713 1.als  
 COMNT YKYI-09-713  
 DATIM 14-FEB-2009 18:28:36  
 OBNUC 1H  
 EXMOD single\_pulse.exp  
 OBFRQ 399.00 MHz  
 OBSET 784.00 KHz  
 OBFIN 597.07 Hz  
 POINT 32768  
 FREQU 5998.80 Hz  
 SCANS 8  
 ACQTM 5.4624 sec  
 PD 2.0000 sec  
 FW1 6.70 usec  
 IRNUC 1H  
 CTEMP 18.6 c  
 SLVNT CDCL3  
 EXREF 0.00 ppm  
 BF 0.12 Hz  
 RGAIN 12

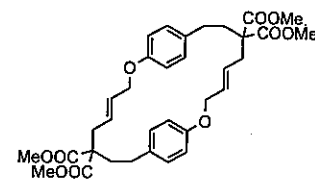<sup>1</sup>H NMR: 8

## YKYI-09-713-13C

G:\NMR\12&lt;2008"N"x\01-N\YKYI-09\YKYI-09-713-13C 2.als

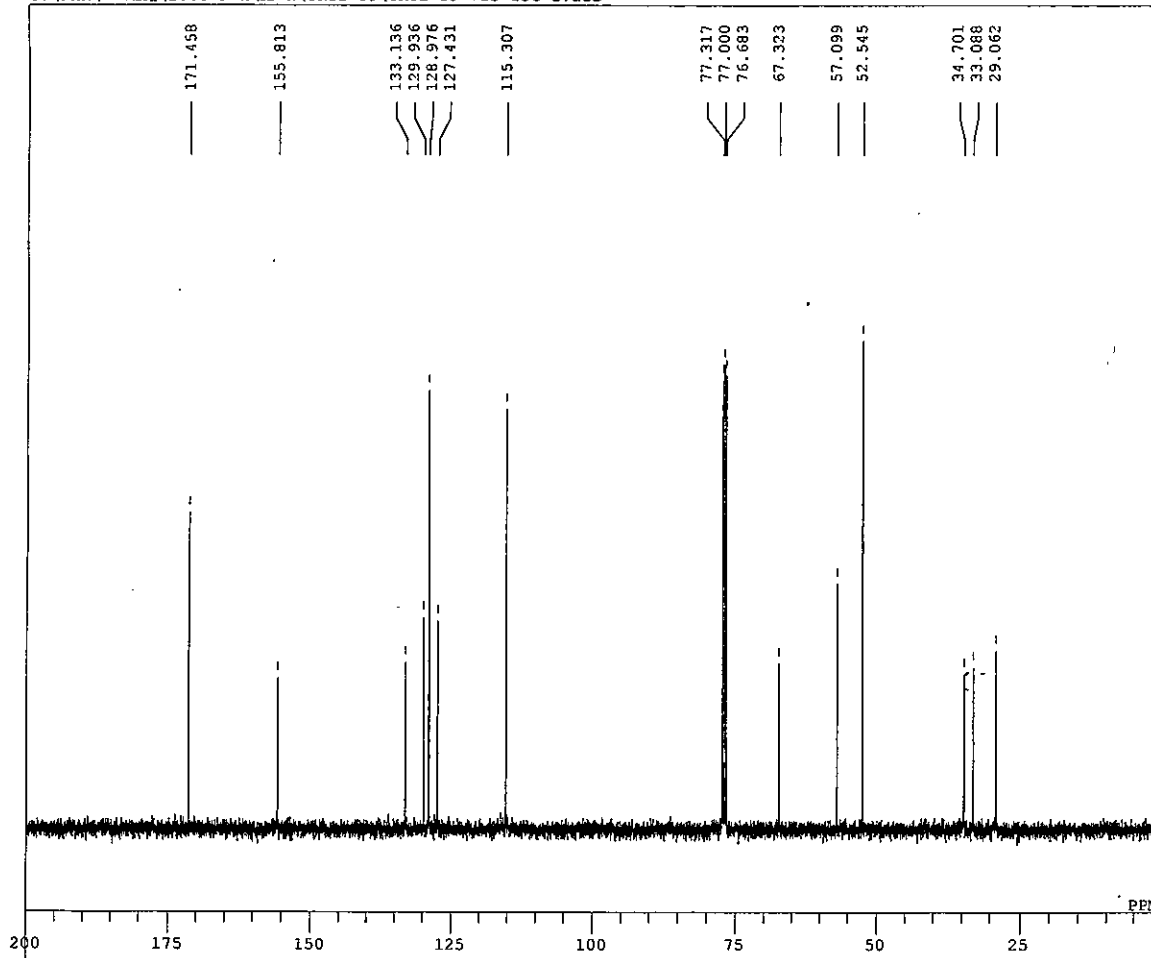

DFILE YKYI-09-713-13C 2.als  
 COMNT YKYI-09-713-13C  
 DATIM 14-FEB-2009 19:03:57  
 OBNUC 13C  
 EXMOD single\_pulse\_dec  
 OBFRQ 100.00 MHz  
 OBSET 536.00 KHz  
 OBFIN 361.11 Hz  
 POINT 65536  
 FREQU 25188.92 Hz  
 SCANS 53  
 ACQTM 2.6018 sec  
 PD 1.5000 sec  
 FW1 3.50 usec  
 IRNUC 1H  
 CTEMP 19.3 c  
 SLVNT CDCL3  
 EXREF 77.00 ppm  
 BF 1.20 Hz  
 RGAIN 26

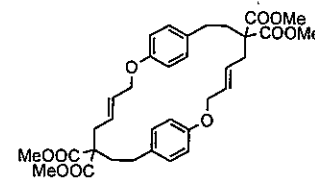<sup>13</sup>C NMR: 8

ykyk05-344p

G:\NMR\1-1\ykyk05-344p\_1.als

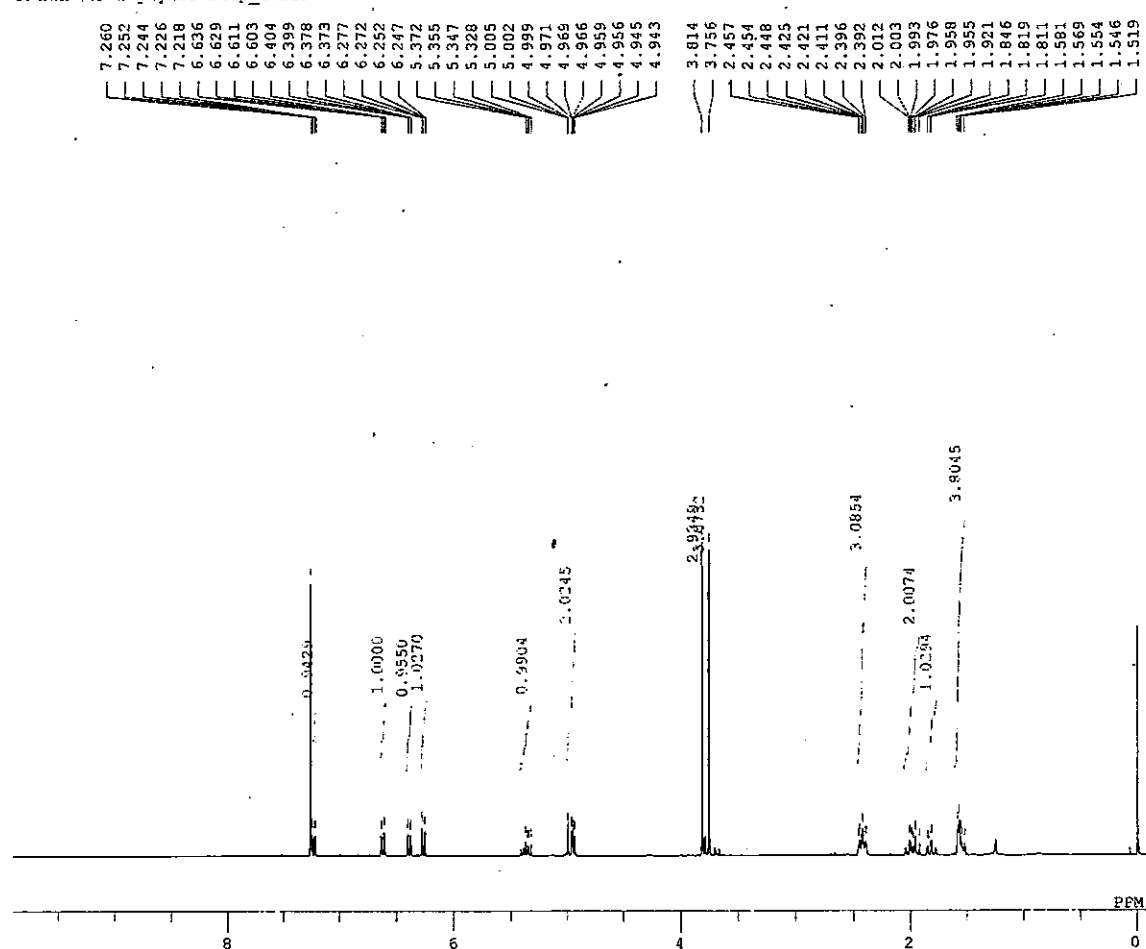

DFILE ykyk05-344p\_1.als  
COMNT ykyk05-344p  
DATIM 16-JUL-2010 03:50:11  
OBNUC 1H  
EXMOD single pulse.exp  
OBFRQ 399.00 MHz  
OBSET 784.00 KHz  
OBFIN 597.07 Hz  
POINT 32768  
FREQU 5998.80 Hz  
SCANS 16  
ACQTM 5.4624 sec  
PD 2.0000 sec  
PW1 6.85 usec  
IRNUC 1H  
CTEMP 22.4 c  
SLVNT CDCL3  
EXREF 7.26 ppm  
BF 0.12 Hz  
RGAIN 18

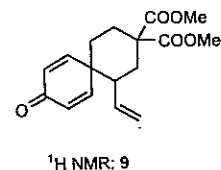

YKYK05-344-13C

G:\NMR\1-1\YKYK05-344-13C.als

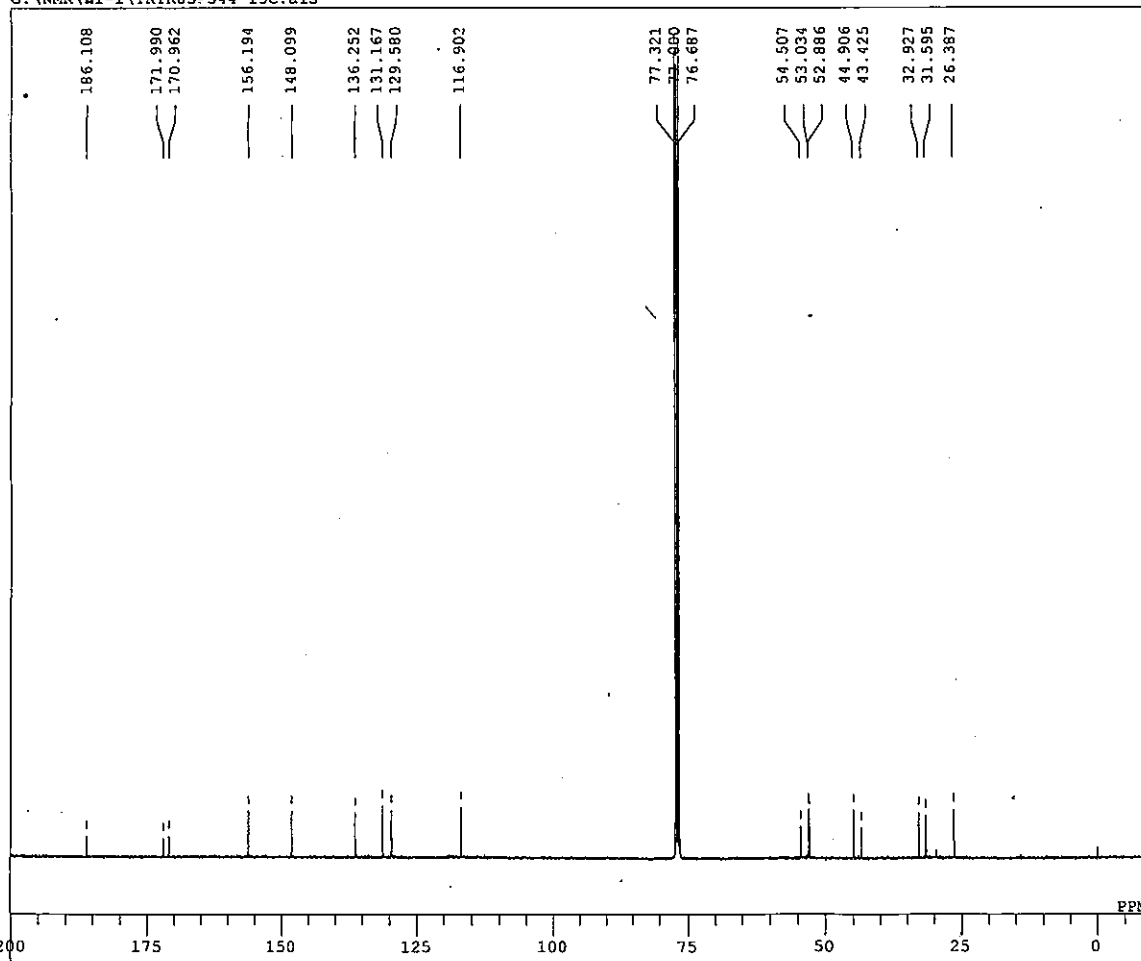

DFILE YKYK05-344-13C.als  
COMNT YKYK05-344-13C  
DATIM 2010-07-16 22:41:04  
OBNUC 13C  
EXMOD SINGL  
OBFRQ 100.40 MHz  
OBSET 130.00 KHz  
OBFIN 5500.00 Hz  
POINT 32768  
FREQU 27100.27 Hz  
SCANS 6802  
ACQTM 1.2091 sec  
PD 3.7000 sec  
PW1 4.90 usec  
IRNUC 1H  
CTEMP 22.0 c  
SLVNT CDCL3  
EXREF 77.00 ppm  
BF 1.20 Hz  
RGAIN 24

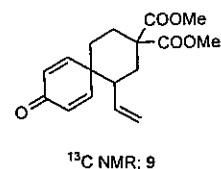

## YK-TN-25-64-1H-mMeO

G:\NMR\nemoto\25\YK-TN-25-64-1H-mMeO 1.als

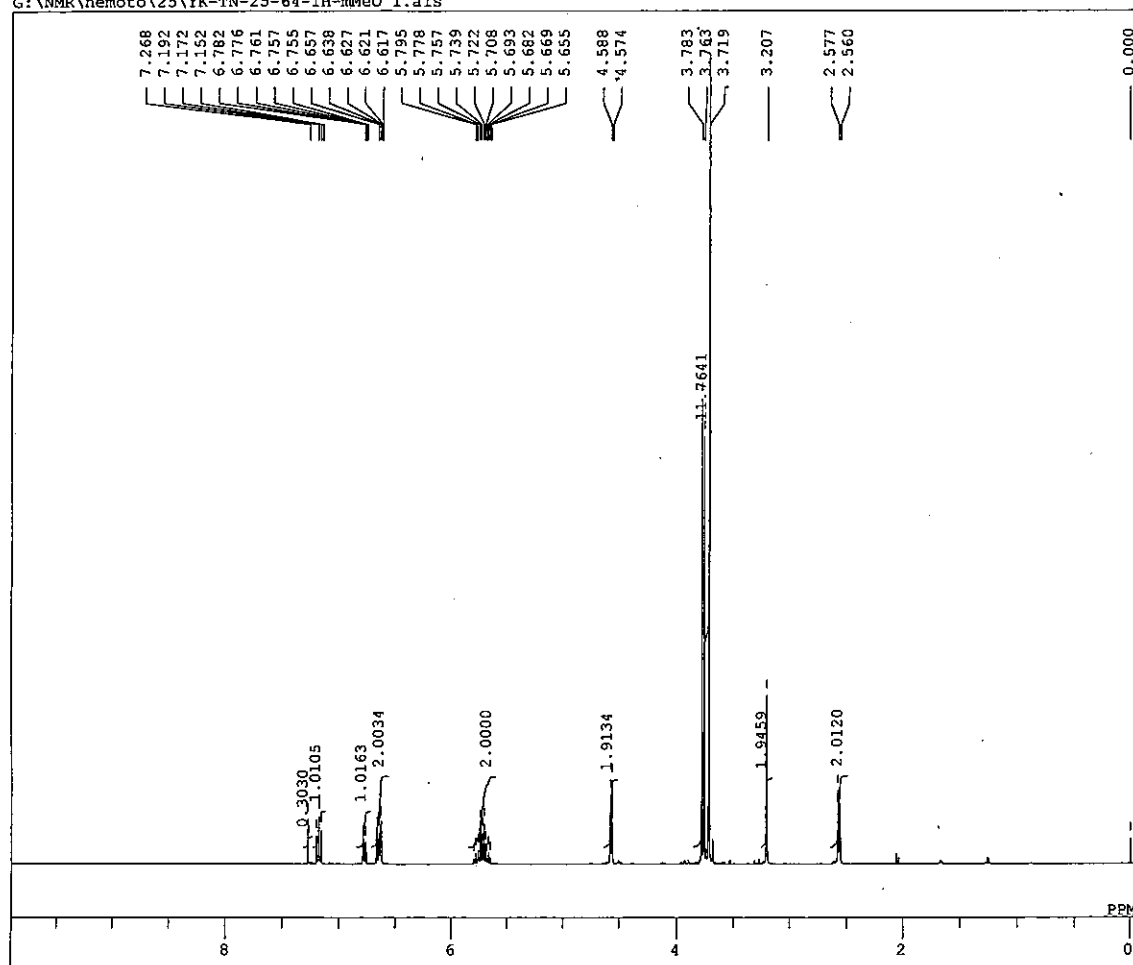

DFILE YK-TN-25-64-1H-mMeO 1.als  
 COMNT YK-TN-25-64-1H-mMeO  
 DATIM 13-FEB-2010 20:47:45  
 OBNUC 1H  
 EXMOD single\_pulse.exp  
 OBFRQ 399.00 MHz  
 OBSET 784.00 KHz  
 OBFIN 597.07 Hz  
 POINT 32768  
 FREQU 5998.80 Hz  
 SCANS 10  
 ACQTM 5.4624 sec  
 PD 2.0000 sec  
 PW1 6.85 usec  
 IRNUC 1H  
 CTEMP 25.0 c  
 SLVNT CDCL3  
 EXREF 0.00 ppm  
 BF 0.12 Hz  
 RGAIN 9

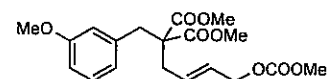<sup>1</sup>H-NMR: 5

## YK-TN-25-64-13C-m-MeO-SM

G:\NMR\nemoto\25\YK-TN-25-64-13C-m-MeO-SM 1.als

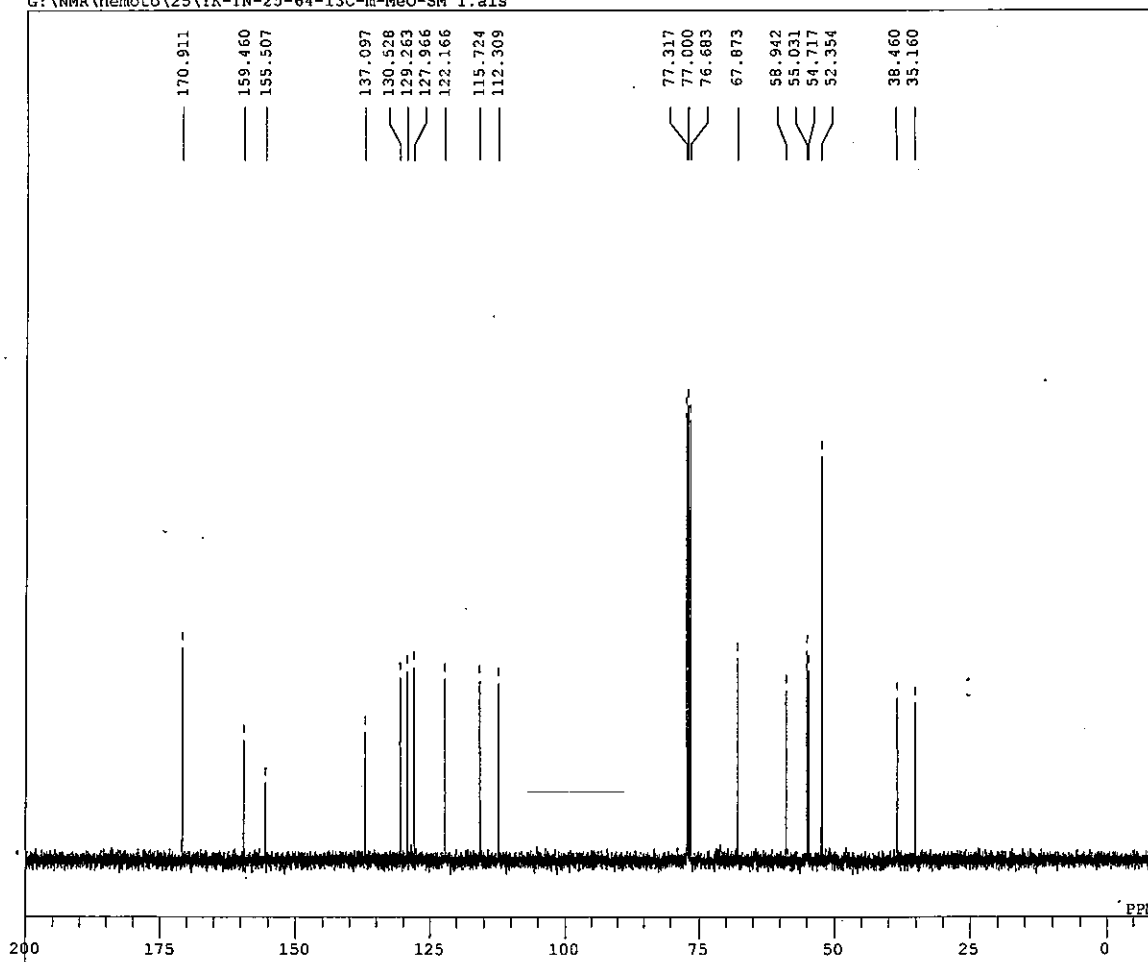

DFILE YK-TN-25-64-13C-m-MeO-SM 1.als  
 COMNT YK-TN-25-64-13C-m-MeO-SM  
 DATIM 13-FEB-2010 20:45:02  
 OBNUC 13C  
 EXMOD single\_pulse\_dec  
 OBFRQ 100.00 MHz  
 OBSET 536.00 KHz  
 OBFIN 361.11 Hz  
 POINT 65536  
 FREQU 25188.92 Hz  
 SCANS 64  
 ACQTM 2.6018 sec  
 PD 1.5000 sec  
 PW1 3.50 usec  
 IRNUC 1H  
 CTEMP 25.0 c  
 SLVNT CDCL3  
 EXREF 77.00 ppm  
 BF 1.20 Hz  
 RGAIN 24

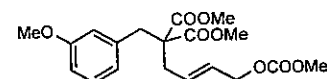<sup>13</sup>C NMR: 5

# YK-TN-25-66-product

G:\NMR\nemoto\25\YK-TN-25-66-product 1.als

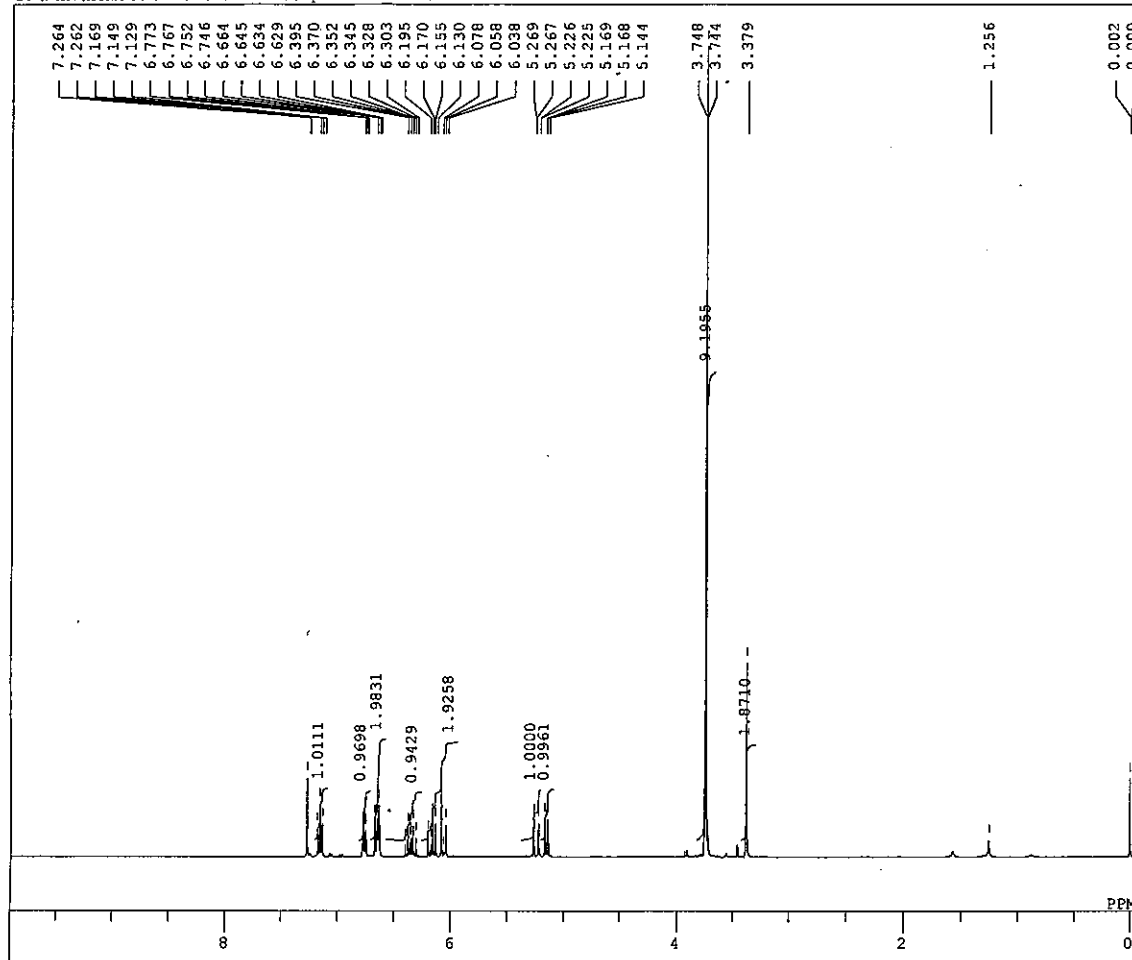

DFILE YK-TN-25-66-product\_1.als  
COMNT YK-TN-25-66-product  
DATIM 7-FEB-2010 02:26:27  
OBNUC 1H  
EXMOD single pulse.exp  
OBFREQ 399.00 MHz  
OBSET 784.00 KHz  
OBFIN 597.07 Hz  
POINT 32768  
FREQU 5998.80 Hz  
SCANS 7  
ACQTM 5.4624 sec  
PD 2.0000 sec  
PWL 6.85 usec  
IRNUC 1H  
CTEMP 19.2 c  
SLVNT CDCL3  
EXREF 0.00 ppm  
BF 0.12 Hz  
RGAIN 14

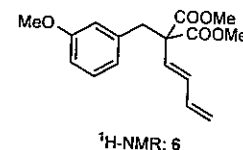

# YK-TN-25-79-13C

G:\NMR\nemoto\25\YK-TN-25-79-13C 1.als

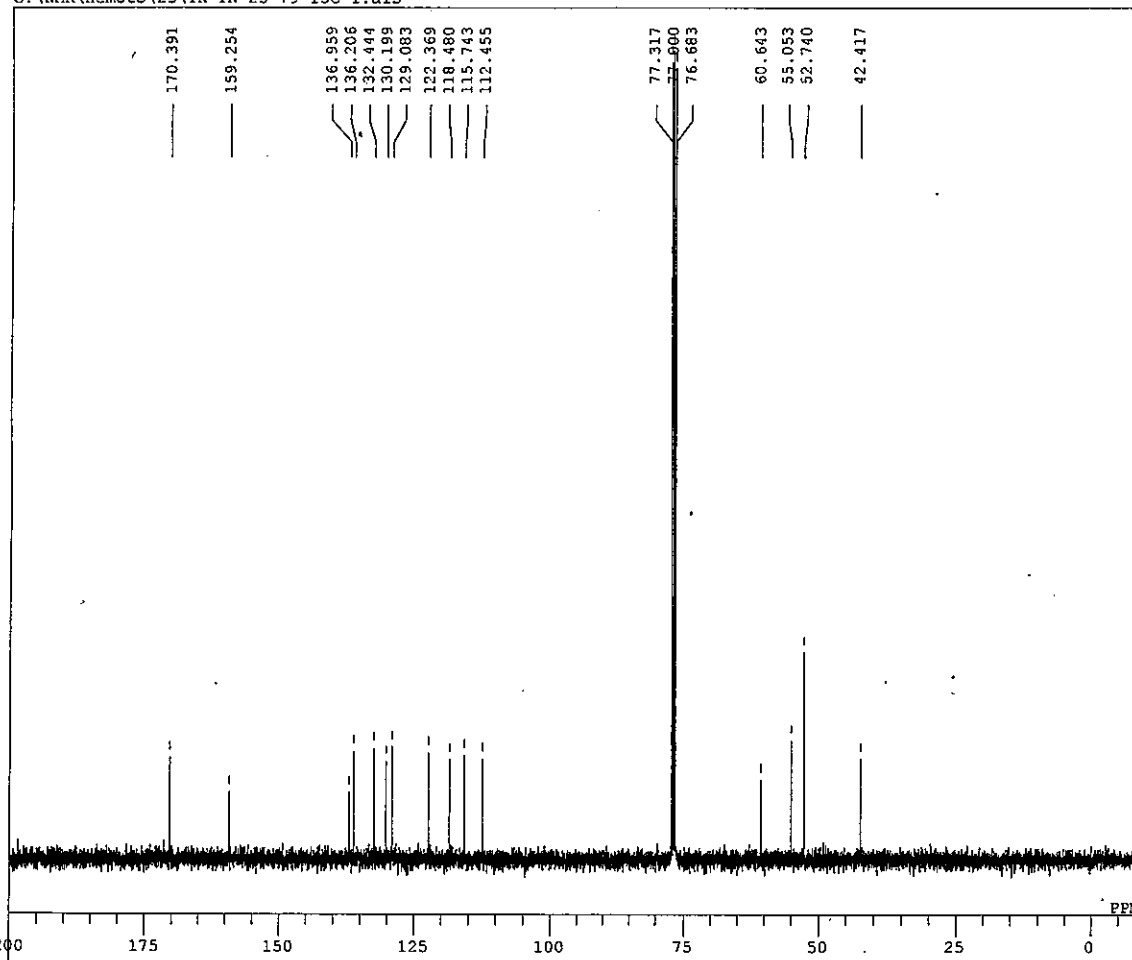

DFILE YK-TN-25-79-13C\_1.als  
COMNT YK-TN-25-79-13C  
DATIM 13-FEB-2010 19:26:51  
OBNUC 13C  
EXMOD single pulse dec  
OBFREQ 100.00 MHz  
OBSET 536.00 KHz  
OBFIN 361.11 Hz  
POINT 65536  
FREQU 25188.92 Hz  
SCANS 126  
ACQTM 2.6018 sec  
PD 1.5000 sec  
PWL 3.50 usec  
IRNUC 1H  
CTEMP 20.5 c  
SLVNT CDCL3  
EXREF 77.00 ppm  
BF 1.20 Hz  
RGAIN 24

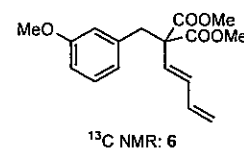

## YK-TN-25-55-SM-1H

G:\NMR\nemoto\25\YK-TN-25-55-SM-1H 1.als

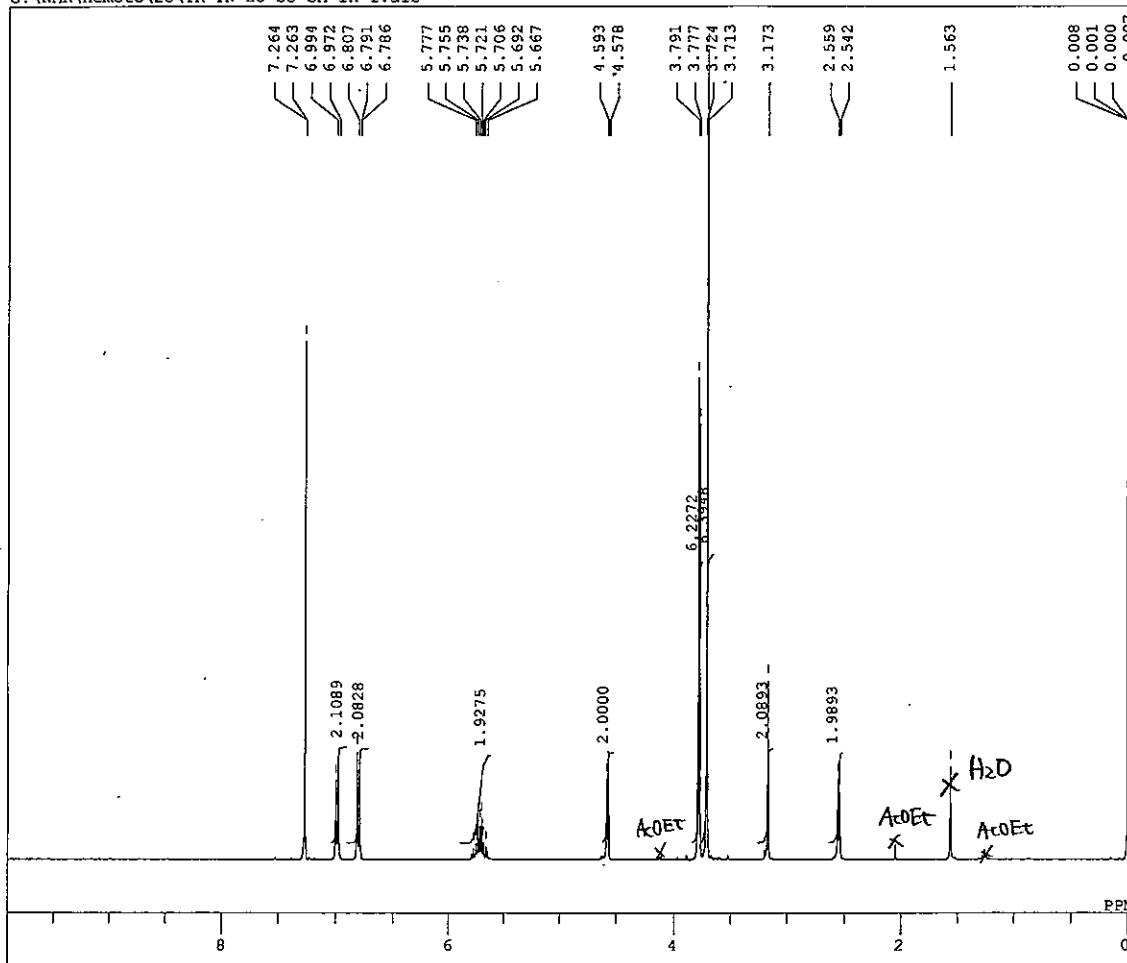

DFILE YK-TN-25-55-SM-1H 1.als  
 COMNT YK-TN-25-55-SM-1H  
 DATIM 14-FEB-2010 23:43:34  
 OBNUC 1H  
 EXMOD single\_pulse.exp  
 OBFRQ 399.00 MHz  
 OBSET 784.00 KHz  
 OBFIN 597.07 Hz  
 POINT 32768  
 FREQU 5998.80 Hz  
 SCANS 7  
 ACQTM 5.4624 sec  
 PD 2.0000 sec  
 PW1 6.85 usec  
 IRNUC 1H  
 CTEMP 19.5 c  
 SLVNT CDCL3  
 EXREF 0.00 ppm  
 BF 0.12 Hz  
 RGAIN 18

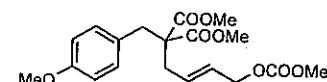<sup>1</sup>H-NMR: S-31

## YK-TN-25-55-SM-13C

G:\NMR\nemoto\25\YK-TN-25-55-SM-13C 1.als

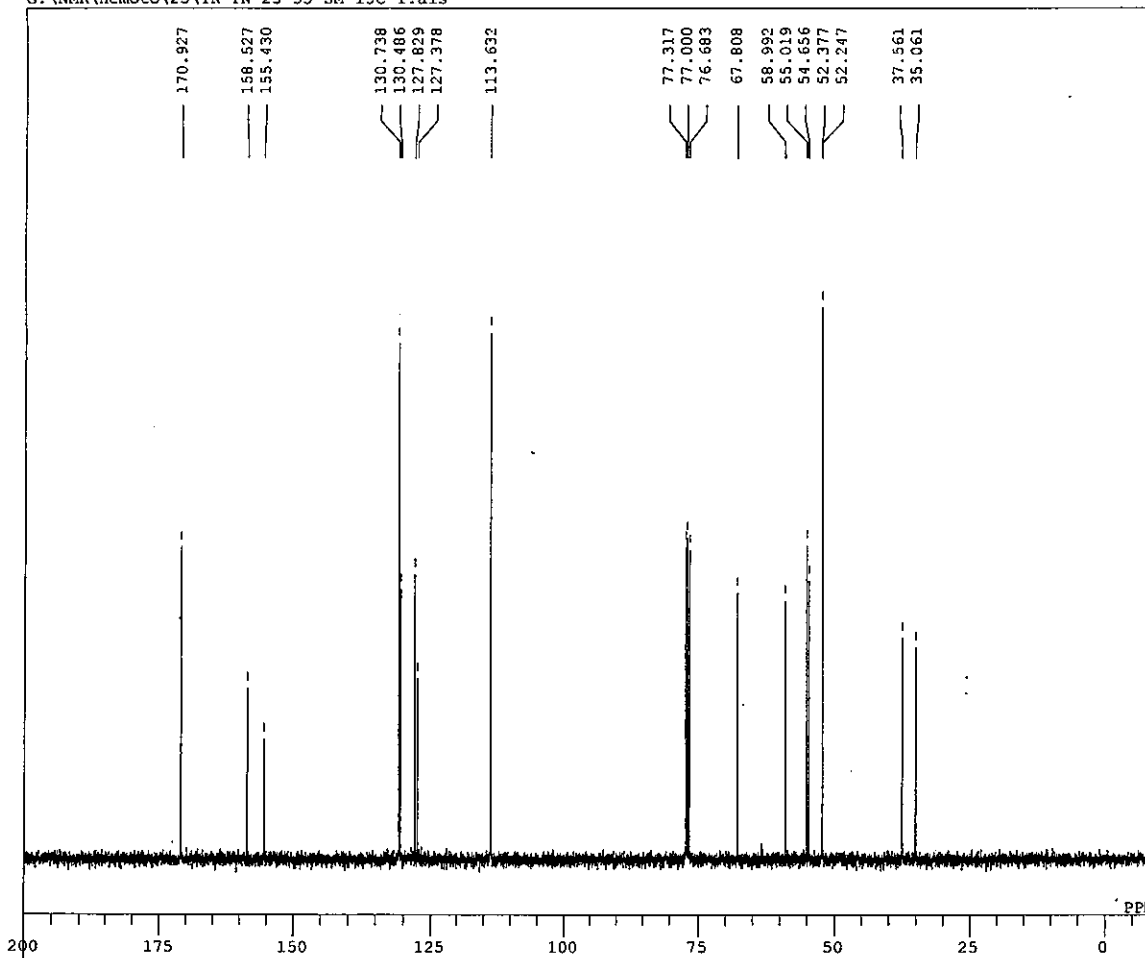

DFILE YK-TN-25-55-SM-13C 1.als  
 COMNT YK-TN-25-55-SM-13C  
 DATIM 14-FEB-2010 23:49:35  
 OBNUC 13C  
 EXMOD single\_pulse\_dec  
 OBFRQ 100.00 MHz  
 OBSET 536.00 KHz  
 OBFIN 361.11 Hz  
 POINT 65536  
 FREQU 25188.92 Hz  
 SCANS 40  
 ACQTM 2.6018 sec  
 PD 1.5000 sec  
 PW1 3.50 usec  
 IRNUC 1H  
 CTEMP 20.6 c  
 SLVNT CDCL3  
 EXREF 77.00 ppm  
 BF 1.20 Hz  
 RGAIN 23

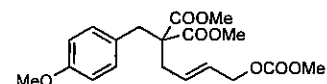<sup>13</sup>C NMR: S-31

# YK-TN-25-55-crude

G:\NMR\nemoto\25\YK-TN-25-55-product 1.als

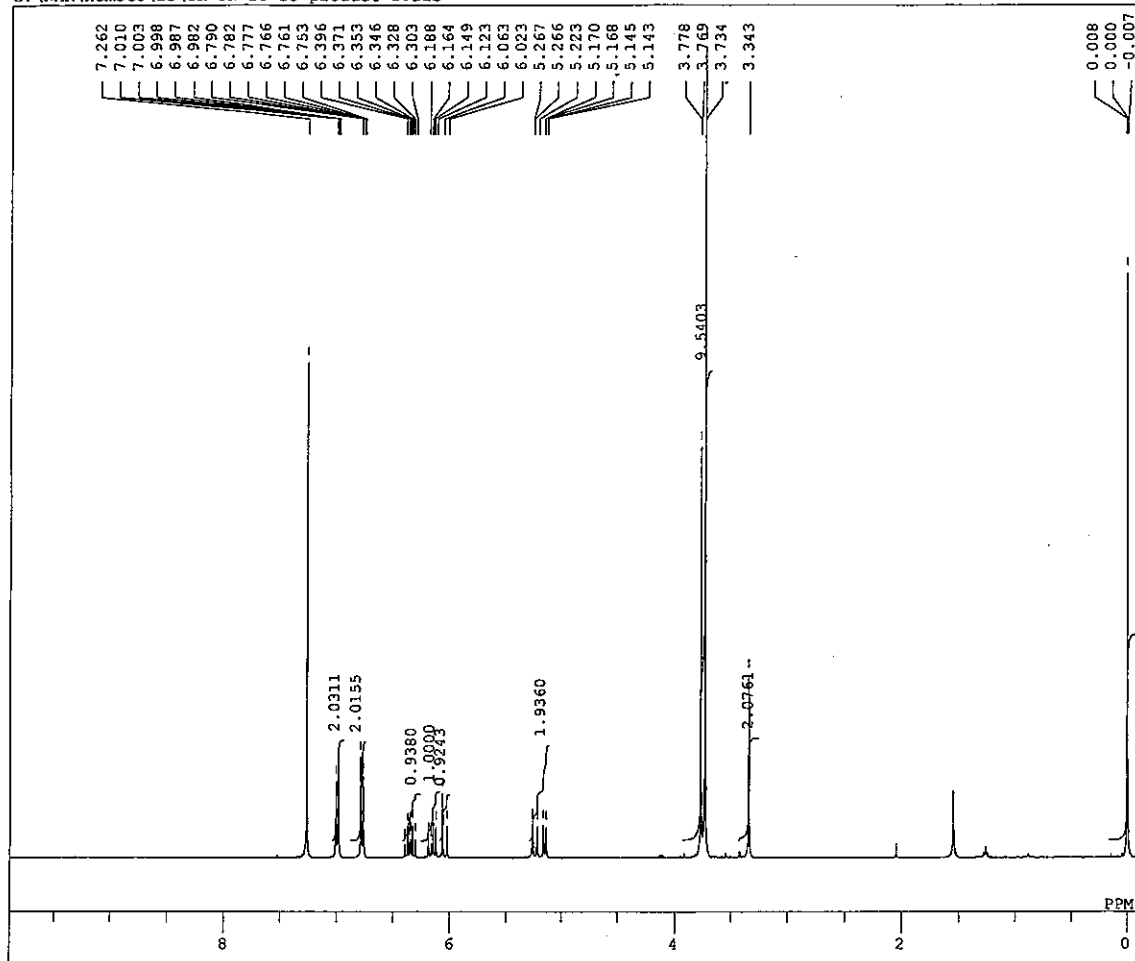

DFILE YK-TN-25-55-product\_1.als  
COMNT YK-TN-25-55-crude  
DATIM 30-JAN-2010 02:11:46  
OBNUC 1H  
EXMOD single\_pulse.exp  
OBFRQ 399.00 MHz  
OBSET 784.00 KHz  
OBFIN 597.07 Hz  
POINT 32768  
FREQU 5998.80 Hz  
SCANS 16  
ACQTM 5.4624 sec  
PD 2.0000 sec  
FW1 6.70 usec  
IRNUC 1H  
CTEMP 20.9 c  
SLVNT CDCL3  
EXREF 0.00 ppm  
BF 0.12 Hz  
RGAIN 20

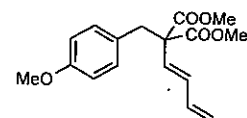

<sup>1</sup>H-NMR: S-32

# YK-TN-25-55-13C-p-MeO-diene

G:\NMR\nemoto\25\YK-TN-25-55-13C-p-MeO-diene 1.als

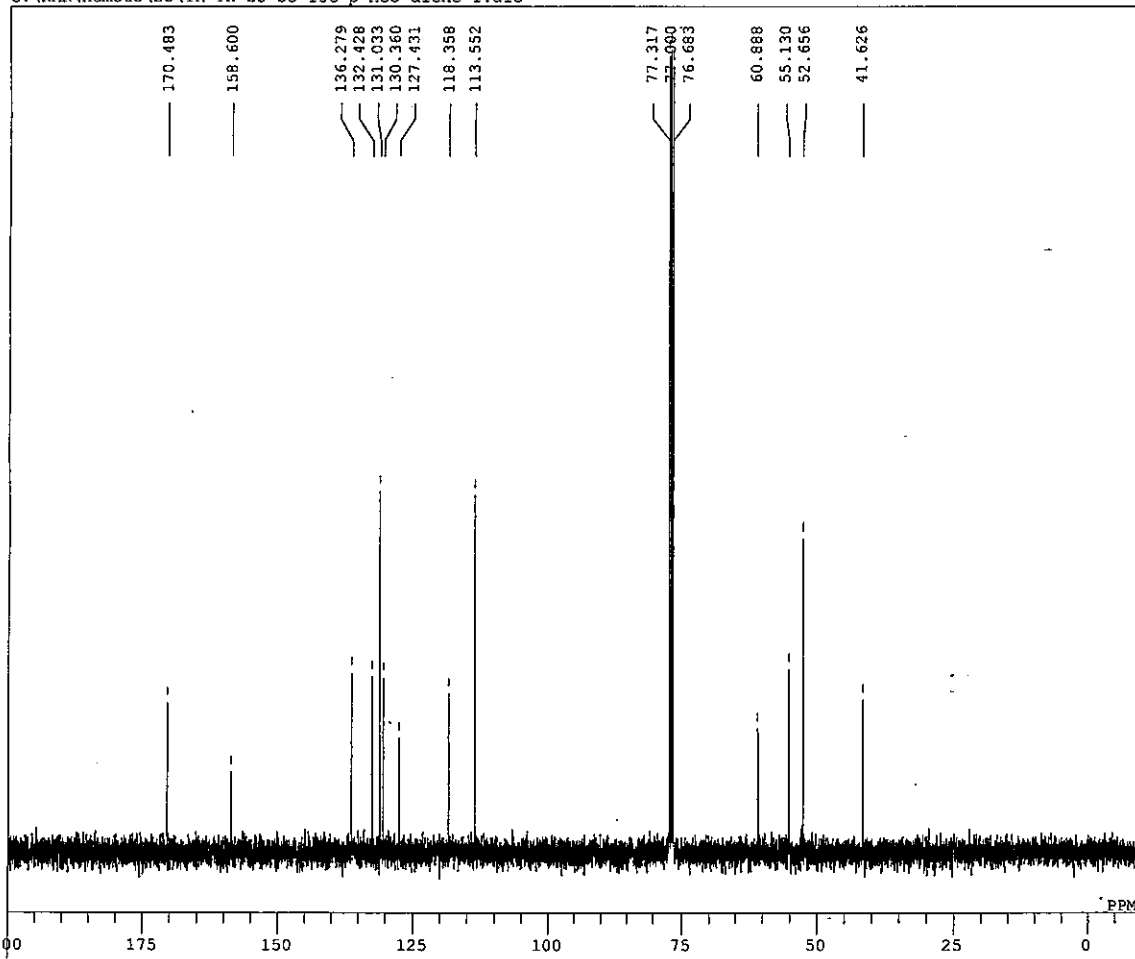

DFILE YK-TN-25-55-13C-p-MeO-diene  
COMNT YK-TN-25-55-13C-p-MeO-diene  
DATIM 13-FEB-2010 20:37:21  
OBNUC 13C  
EXMOD single\_pulse\_dec  
OBFRQ 100.00 MHz  
OBSET 536.00 KHz  
OBFIN 361.11 Hz  
POINT 65536  
FREQU 25188.92 Hz  
SCANS 71  
ACQTM 2.6018 sec  
PD 1.5000 sec  
FW1 3.50 usec  
IRNUC 1H  
CTEMP 25.0 c  
SLVNT CDCL3  
EXREF 77.00 ppm  
BF 1.20 Hz  
RGAIN 23

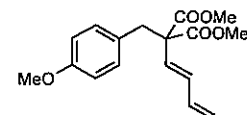

<sup>13</sup>C NMR: S-32

## YK-TN-27-71-1H

G:\NMR\nemoto\27\YK-TN-27-71-1H 1.als

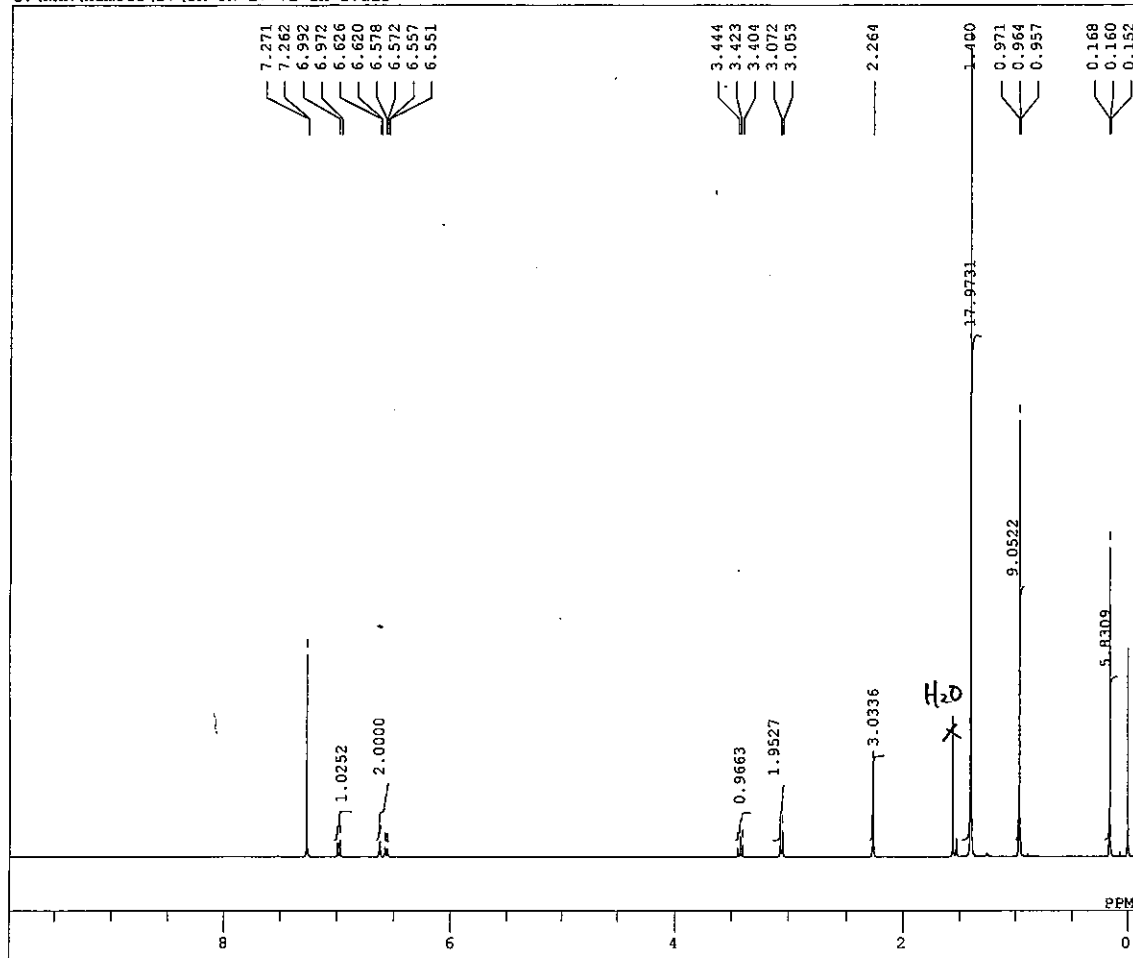

DFILE YK-TN-27-71-1H 1.als  
 COMNT YK-TN-27-71-1H  
 DATIM 18-AUG-2010 22:25:23  
 OBNUC 1H  
 EXMOD single pulse.exp  
 OBFRQ 399.00 MHz  
 OBSET 784.00 KHz  
 OBFIN 597.07 Hz  
 POINT 32768  
 FREQU 5998.80 Hz  
 SCANS 16  
 ACQTM 5.4624 sec  
 PD 2.0000 sec  
 PW1 6.85 usec  
 IRNUC 1H  
 CTEMP 21.7 c  
 SLVNT CDCL3  
 EXREF 0.00 ppm  
 BF 0.12 Hz  
 RGAIN 18

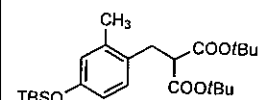<sup>1</sup>H NMR: s-33

## YK-TN-27-71-13C2

G:\NMR\nemoto\27\YK-TN-27-71-13C2 1.als

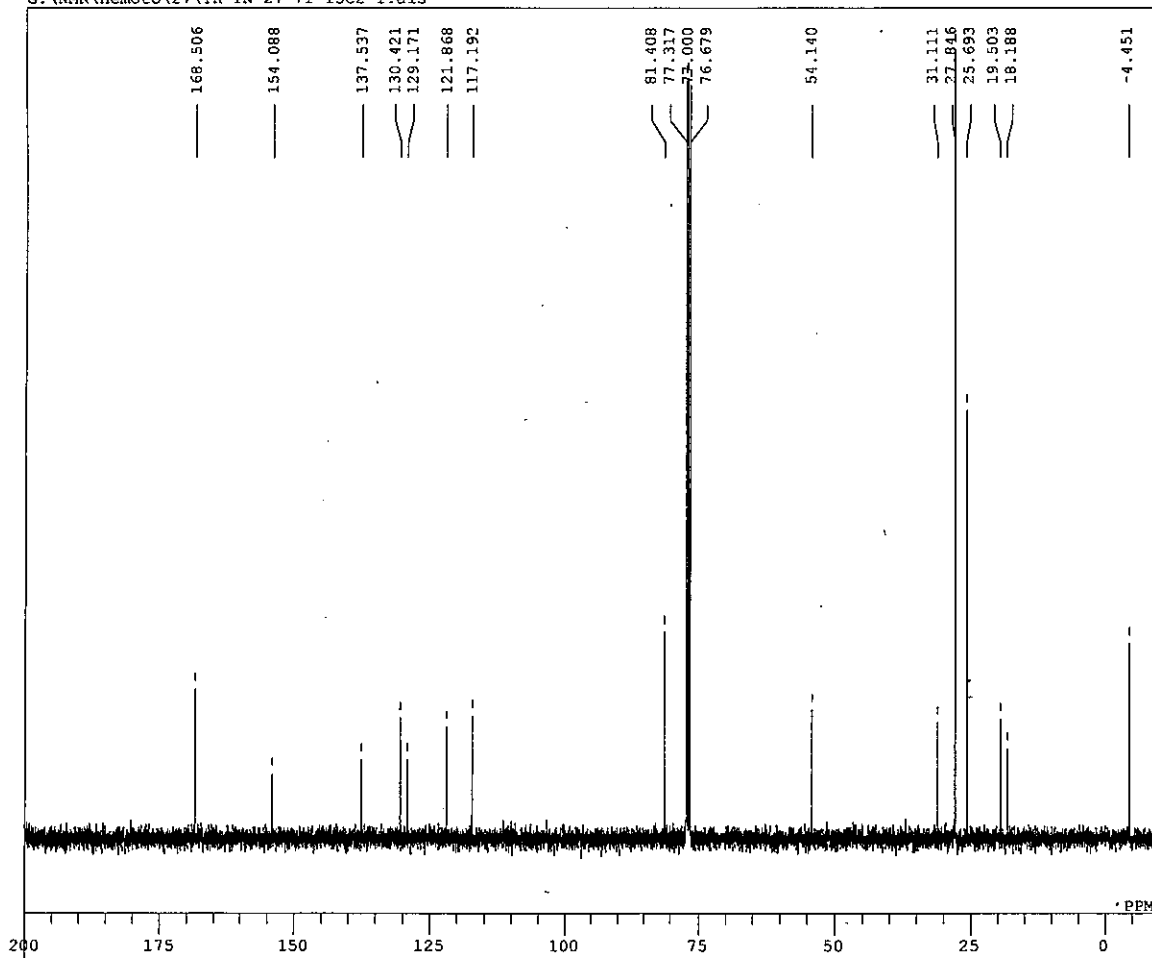

DFILE YK-TN-27-71-13C2 1.als  
 COMNT YK-TN-27-71-13C2  
 DATIM 18-AUG-2010 22:39:19  
 OBNUC 13C  
 EXMOD single pulse dec  
 OBFRQ 100.00 MHz  
 OBSET 536.00 KHz  
 OBFIN 361.11 Hz  
 POINT 65536  
 FREQU 25188.92 Hz  
 SCANS 98  
 ACQTM 2.6018 sec  
 PD 1.5000 sec  
 PW1 3.50 usec  
 IRNUC 1H  
 CTEMP 23.0 c  
 SLVNT CDCL3  
 EXREF 77.00 ppm  
 BF 1.20 Hz  
 RGAIN 24

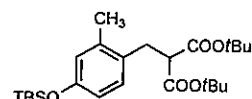<sup>13</sup>C NMR: s-33



## YK-TN-27-75-1H

G:\NMR\nemoto\27\YK-TN-27-75-1H 1.als

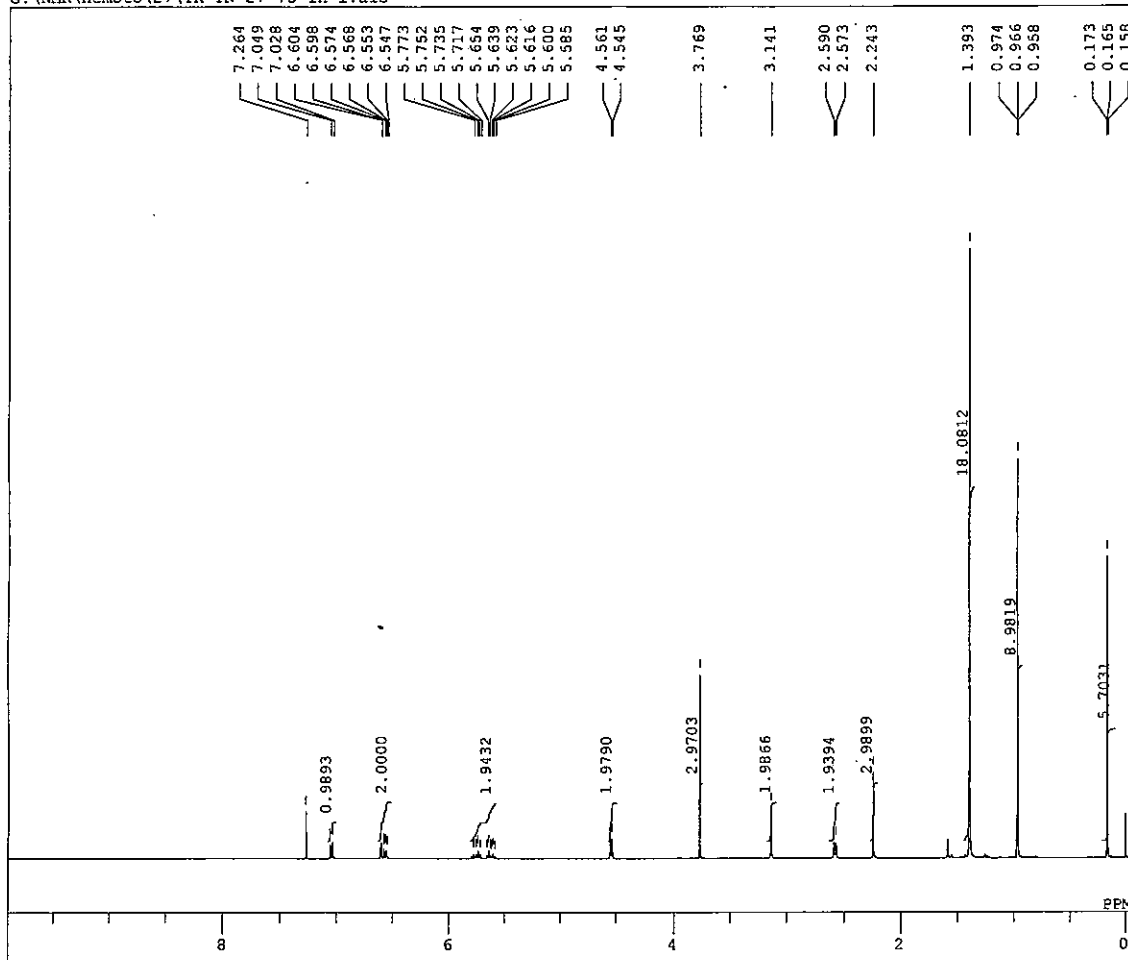

DFILE YK-TN-27-75-1H 1.als  
 COMNT YK-TN-27-75-1H  
 DATIM 19-AUG-2010 23:22:51  
 OBNUC 1H  
 EXMOD single pulse.exp  
 OBFRQ 399.00 MHz  
 OBSET 784.00 KHz  
 OBFIN 597.07 Hz  
 POINT 32768  
 FREQU 5998.80 Hz  
 SCANS 16  
 ACQTM 5.4624 sec  
 PD 2.0000 sec  
 PW1 6.85 usec  
 IRNUC 1H  
 CTEMP 22.2 c  
 SLVNT CDCL3  
 EXREF 0.00 ppm  
 BF 0.12 Hz  
 RGAIN 13

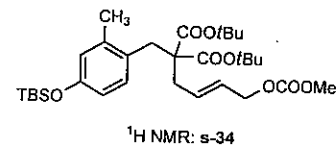

## YK-TN-27-75-13C

G:\NMR\nemoto\27\YK-TN-27-75-13C 1.als

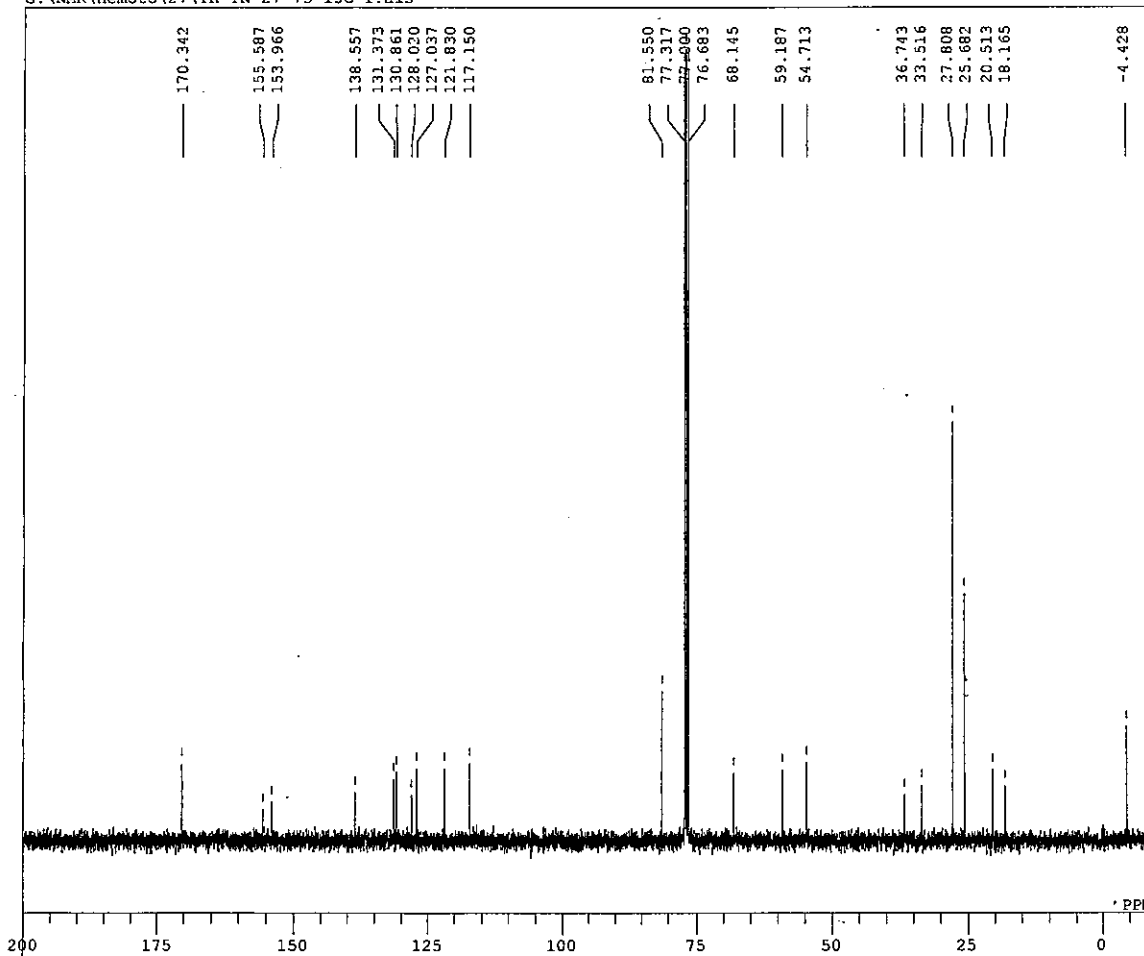

DFILE YK-TN-27-75-13C 1.als  
 COMNT YK-TN-27-75-13C  
 DATIM 19-AUG-2010 23:18:55  
 OBNUC 13C  
 EXMOD single pulse dec  
 OBFRQ 100.00 MHz  
 OBSET 536.00 KHz  
 OBFIN 361.11 Hz  
 POINT 65536  
 FREQU 25188.92 Hz  
 SCANS 161  
 ACQTM 2.6018 sec  
 PD 1.5000 sec  
 PW1 3.50 usec  
 IRNUC 1H  
 CTEMP 23.3 c  
 SLVNT CDCL3  
 EXREF 77.00 ppm  
 BF 1.20 Hz  
 RGAIN 23

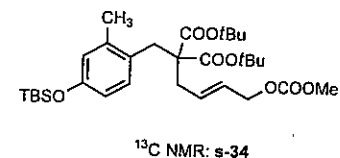

# YKMY-tBu-SM-1H

G:\NMR\g"c\spiro data\YKMY-tBu-SM-1H 1.als

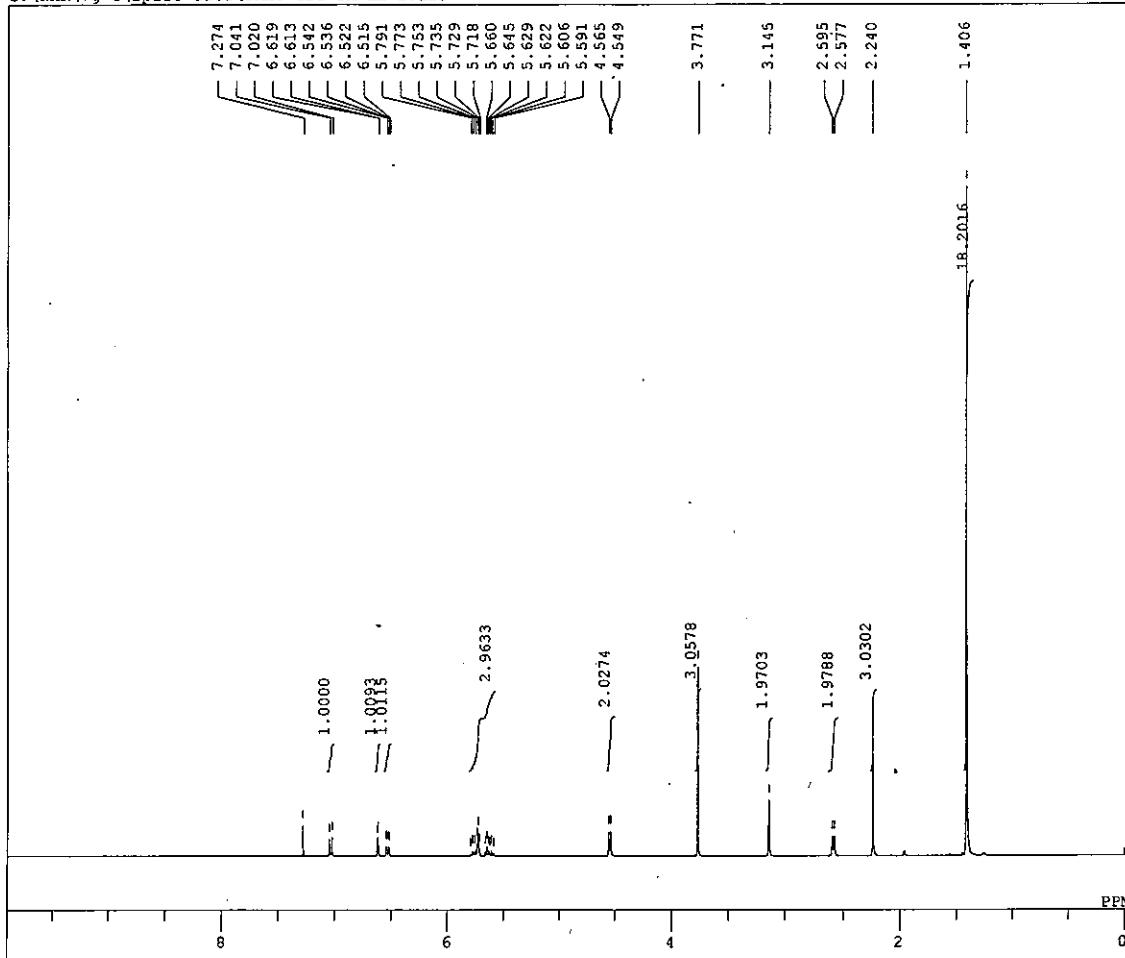

DFILE YKMY-tBu-SM-1H 1.als  
COMNT YKMY-tBu-SM-1H  
DATIM 17-AUG-2010 17:06:24  
OBNUC 1H  
EXMOD single pulse.exp  
OBFRQ 399.00 MHz  
OBSET 784.00 KHz  
OBFIN 597.07 Hz  
POINT 32768  
FREQU 5998.80 Hz  
SCANS 16  
ACQTM 5.4624 sec  
PD 2.0000 sec  
PW1 6.85 usec  
IRNUC 1H  
CTEMP 22.6 c  
SLVNT CDCL3  
EXREF 0.00 ppm  
BF 0.12 Hz  
RGAIN 13

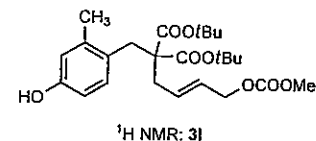

# YKMY-tBu-SM-13C-2

G:\NMR\g"c\spiro data\YKMY-tBu-SM-13C-2 2.als

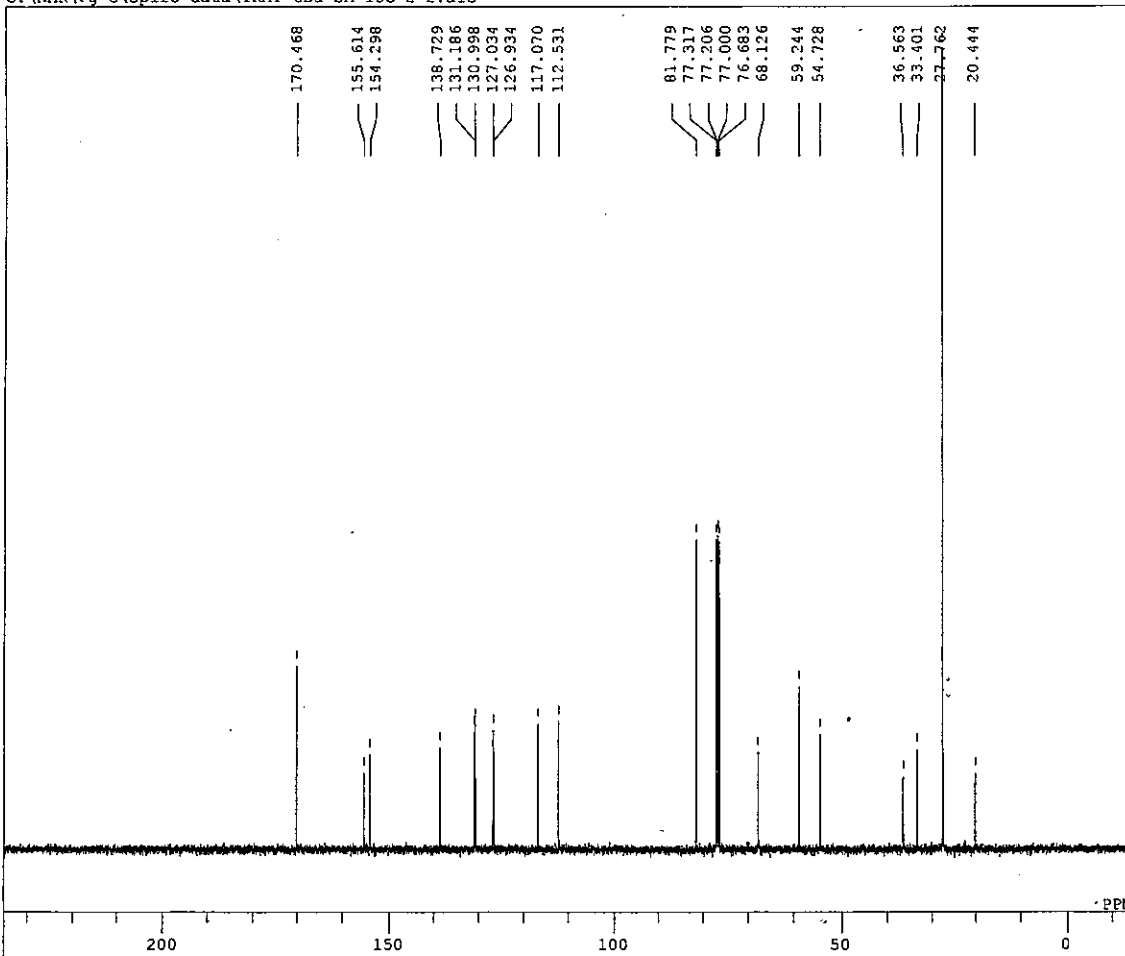

DFILE YKMY-tBu-SM-13C-2 2.als  
COMNT YKMY-tBu-SM-13C-2  
DATIM 17-AUG-2010 17:27:50  
OBNUC 13C  
EXMOD single pulse dec  
OBFRQ 100.00 MHz  
OBSET 536.00 KHz  
OBFIN 361.11 Hz  
POINT 65536  
FREQU 25188.92 Hz  
SCANS 115  
ACQTM 2.6018 sec  
PD 1.5000 sec  
PW1 3.50 usec  
IRNUC 1H  
CTEMP 23.1 c  
SLVNT CDCL3  
EXREF 77.00 ppm  
BF 1.20 Hz  
RGAIN 23

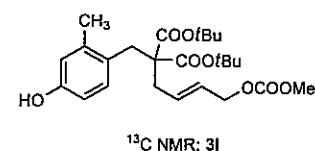

# YKMY-13-518-PRODUCT-1H

G:\NMR\g\c\spiro data\YKMY-13-518-PRODUCT-1H 1.als

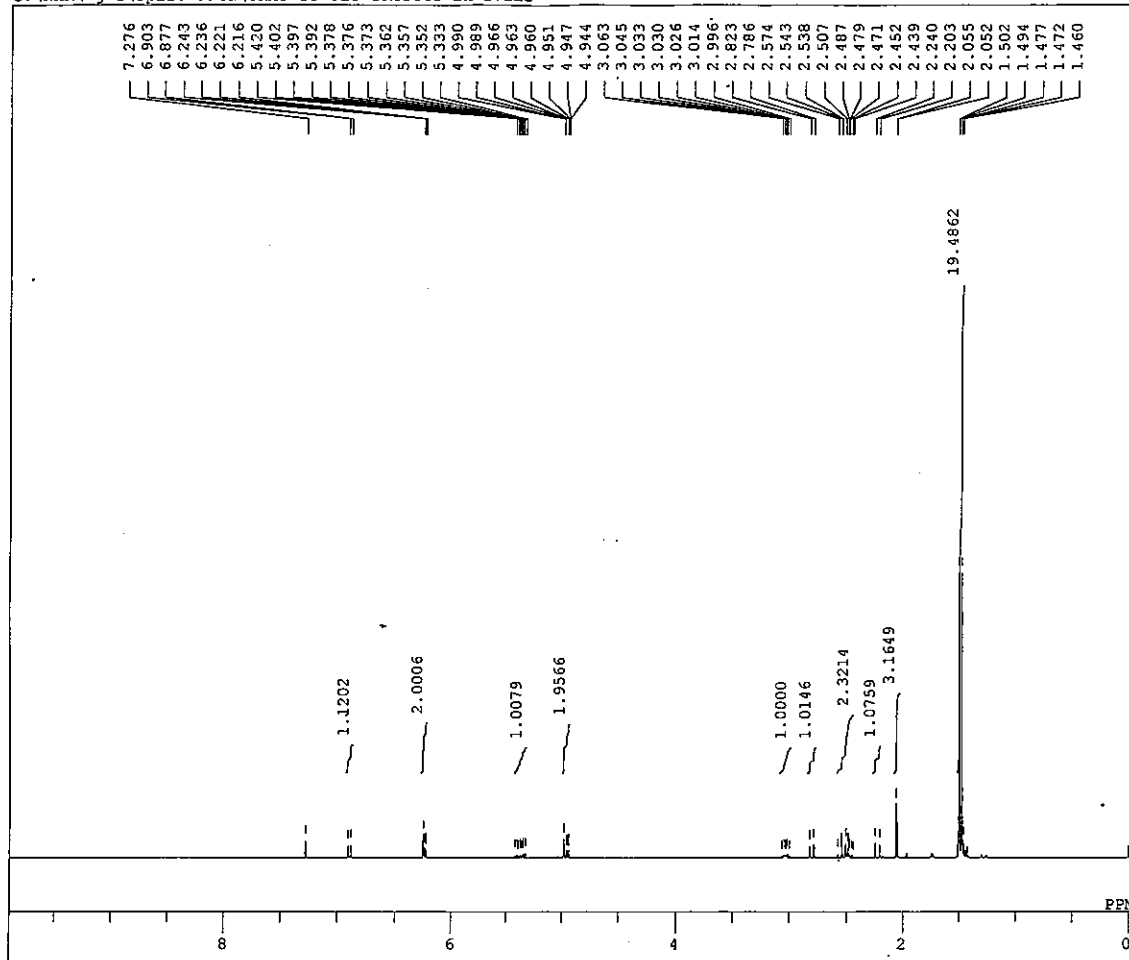

DFILE YKMY-13-518-PRODUCT-1H 1.als  
COMNT YKMY-13-518-PRODUCT-1H  
DATIM 22-AUG-2010 16:42:30  
OBNUC 1H  
EXMOD single pulse.exp  
OBFRQ 399.00 MHz  
OBSET 784.00 KHz  
OBFIN 597.07 Hz  
POINT 32768  
FREQU 5998.80 Hz  
SCANS 16  
ACQTM 5.4624 sec  
PD 2.0000 sec  
PWL 6.85 usec  
IRNUC 1H  
CTEMP 22.2 c  
SLVNT CDCL3  
EXREF 0.00 ppm  
BF 0.12 Hz  
RGAIN 10

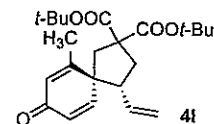

<sup>1</sup>H NMR: 4i

Inseparable  
diastereo-mixture

# YKMY-13-518-PRODUCT-13C

G:\NMR\g\c\spiro data\YKMY-13-518-PRODUCT-13C 1.als

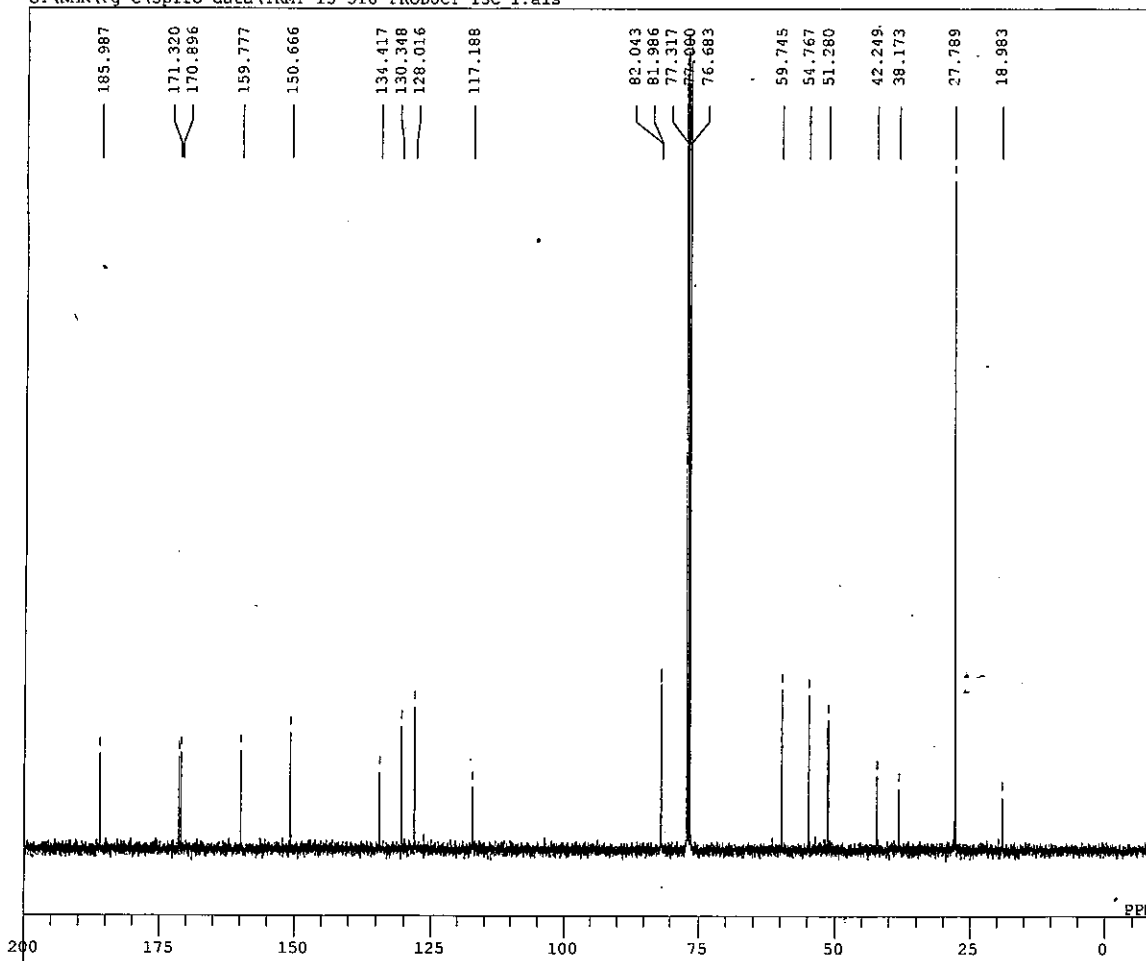

DFILE YKMY-13-518-PRODUCT-13C 1.a  
COMNT YKMY-13-518-PRODUCT-13C  
DATIM 22-AUG-2010 17:06:12  
OBNUC 13C  
EXMOD single pulse dec  
OBFRQ 100.00 MHz  
OBSET 536.00 KHz  
OBFIN 361.11 Hz  
POINT 65536  
FREQU 25188.92 Hz  
SCANS 313  
ACQTM 2.6018 sec  
PD 1.5000 sec  
PWL 3.50 usec  
IRNUC 1H  
CTEMP 22.6 c  
SLVNT CDCL3  
EXREF 77.00 ppm  
BF 1.20 Hz  
RGAIN 24

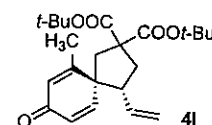

<sup>13</sup>C NMR: 4i
